# Supplementary material for: Targeting colorectal cancer with small-molecule inhibitors of ALDH1B1
Source: Springer Nature journal article supplement (doi:10.1038/s41589-022-01048-w), 2022-07-04
Supplement: MOESM4 [file 41589_2022_1048_MOESM4_ESM.xlsx]

## Sheet: Spot 1
Description	|Log Prob|	Best |Log Prob|	Best score	Total Intensity	# of spectra	# of unique peptides	# of mod peptides	Coverage %	# AA's in protein	Protein DB number
>sp|Q8C196|CPSM_MOUSE Carbamoyl-phosphate synthase [ammonia], mitochondrial OS=Mus musculus GN=Cps1 PE=1 SV=2	192.76	8.94	696.1	6.64338e+06	116	67	21	31.53	1500	4652
>sp|Q9EQ20|MMSA_MOUSE Methylmalonate-semialdehyde dehydrogenase [acylating], mitochondrial OS=Mus musculus GN=Aldh6a1 PE=1 SV=1	110.71	5.3	498	1.4266e+07	99	42	16	43.36	535	12968
>sp|Q03265|ATPA_MOUSE ATP synthase subunit alpha, mitochondrial OS=Mus musculus GN=Atp5a1 PE=1 SV=1	104.88	9.11	654.7	8.75581e+06	76	35	9	39.06	553	1671
>sp|P26443|DHE3_MOUSE Glutamate dehydrogenase 1, mitochondrial OS=Mus musculus GN=Glud1 PE=1 SV=1	104.01	9.77	667.6	1.19738e+07	93	40	15	43.91	558	5628
>sp|P47738|ALDH2_MOUSE Aldehyde dehydrogenase, mitochondrial OS=Mus musculus GN=Aldh2 PE=1 SV=1	92.53	8.11	633.5	1.20197e+07	159	32	4	45.28	519	776
>sp|K2C1_HUMAN|(Common contaminant protein)	91.1	6.48	614.8	3.84497e+06	57	39	10	42.77	643	24165
>sp|K1C9_HUMAN|(Common contaminant protein)	86.37	4.44	520.3	2.2833e+06	41	32	17	25.36	623	24152
>sp|P24270|CATA_MOUSE Catalase OS=Mus musculus GN=Cat PE=1 SV=4	81.78	4.99	403.4	3.93565e+06	48	31	7	41.94	527	2638
>sp|Q9DBF1|AL7A1_MOUSE Alpha-aminoadipic semialdehyde dehydrogenase OS=Mus musculus GN=Aldh7a1 PE=1 SV=4	72.35	5.49	455.7	3.09198e+06	41	24	10	30.06	539	767
>sp|Q9CZS1|AL1B1_MOUSE Aldehyde dehydrogenase X, mitochondrial OS=Mus musculus GN=Aldh1b1 PE=2 SV=1	65.8	7.94	616	4.29298e+06	34	24	5	36.61	519	754
>sp|Q99LB7|SARDH_MOUSE Sarcosine dehydrogenase, mitochondrial OS=Mus musculus GN=Sardh PE=1 SV=1	63.13	5.37	442.1	2.15169e+06	36	28	5	22.96	919	18698
>sp|Q9CPY7|AMPL_MOUSE Cytosol aminopeptidase OS=Mus musculus GN=Lap3 PE=1 SV=3	61.88	6.06	579.8	1.94185e+06	35	23	8	39.5	519	857
>sp|Q8VCT4|CES3_MOUSE Carboxylesterase 3 OS=Mus musculus GN=Ces3 PE=1 SV=1	57.88	5.95	581.2	2.19559e+06	31	19	6	23.89	565	3521
>sp|Q8CAQ8-5|IMMT_MOUSE Isoform 5 of Mitochondrial inner membrane protein OS=Mus musculus GN=Immt	57.47	4.17	375.2	1902202	32	27	6	24.94	790	10080
>sp|P27773|PDIA3_MOUSE Protein disulfide-isomerase A3 OS=Mus musculus GN=Pdia3 PE=1 SV=2	55.34	4.99	438.1	2.01069e+06	30	24	4	36.24	505	15382
>sp|Q8CHT0|AL4A1_MOUSE Delta-1-pyrroline-5-carboxylate dehydrogenase, mitochondrial OS=Mus musculus GN=Aldh4a1 PE=1 SV=3	52.79	4.38	567.6	2.44794e+06	32	21	6	27.4	562	765
>sp|Q9JLJ2|AL9A1_MOUSE 4-trimethylaminobutyraldehyde dehydrogenase OS=Mus musculus GN=Aldh9a1 PE=1 SV=1	52.01	5.22	466.3	1.28474e+06	27	20	8	35.43	494	770
>sp|O08749|DLDH_MOUSE Dihydrolipoyl dehydrogenase, mitochondrial OS=Mus musculus GN=Dld PE=1 SV=2	51.29	9.94	705.5	2143980	28	18	5	24.36	509	5743
>sp|Q99MN9|PCCB_MOUSE Propionyl-CoA carboxylase beta chain, mitochondrial OS=Mus musculus GN=Pccb PE=1 SV=2	45.28	6.26	545.2	886613	23	18	4	30.87	541	15240
>sp|P54869|HMCS2_MOUSE Hydroxymethylglutaryl-CoA synthase, mitochondrial OS=Mus musculus GN=Hmgcs2 PE=1 SV=2	43.21	4.17	344.4	1.25126e+06	24	21	5	27.56	508	9320
>sp|Q91ZA3|PCCA_MOUSE Propionyl-CoA carboxylase alpha chain, mitochondrial OS=Mus musculus GN=Pcca PE=2 SV=2	42.39	5.28	355	540935	17	17	4	21.82	724	15239
>sp|P38647|GRP75_MOUSE Stress-70 protein, mitochondrial OS=Mus musculus GN=Hspa9 PE=1 SV=2	41.3	4.72	384.4	1.91065e+06	30	23	7	23.56	679	8805
>sp|Q3UNX5|ACSM3_MOUSE Acyl-coenzyme A synthetase ACSM3, mitochondrial OS=Mus musculus GN=Acsm3 PE=1 SV=2	40.14	5.28	335.4	681326	15	15	4	23.28	580	391
>sp|Q3UNX5-2|ACSM3_MOUSE Isoform 2 of Acyl-coenzyme A synthetase ACSM3, mitochondrial OS=Mus musculus GN=Acsm3
>sp|P80314|TCPB_MOUSE T-complex protein 1 subunit beta OS=Mus musculus GN=Cct2 PE=1 SV=4	39.32	4.51	454.4	583092	14	12	3	21.5	535	21040
>sp|Q8K2B3|DHSA_MOUSE Succinate dehydrogenase [ubiquinone] flavoprotein subunit, mitochondrial OS=Mus musculus GN=Sdha PE=1 SV=1	38.97	6.06	578	957437	18	14	3	18.98	664	5643
>sp|P07724|ALBU_MOUSE Serum albumin OS=Mus musculus GN=Alb PE=1 SV=3	36.19	4.85	366.1	547072	17	14	2	21.55	608	773
>sp|P32261|ANT3_MOUSE Antithrombin-III OS=Mus musculus GN=Serpinc1 PE=1 SV=1	35.77	5.43	308.1	973715	23	17	2	30.97	465	1054
>sp|P50544|ACADV_MOUSE Very long-chain specific acyl-CoA dehydrogenase, mitochondrial OS=Mus musculus GN=Acadvl PE=1 SV=3	35.22	4.12	455.5	703835	14	14	3	20.12	656	261
>sp|Q9CQN1|TRAP1_MOUSE Heat shock protein 75 kDa, mitochondrial OS=Mus musculus GN=Trap1 PE=1 SV=1	34.93	4.65	508.6	702298	21	17	1	23.94	706	22105
>sp|Q8VCW8|ACSF2_MOUSE Acyl-CoA synthetase family member 2, mitochondrial OS=Mus musculus GN=Acsf2 PE=2 SV=1	33.15	5.6	504.9	718527	13	12	2	18.7	615	373
>sp|Q8BGA8|ACSM5_MOUSE Acyl-coenzyme A synthetase ACSM5, mitochondrial OS=Mus musculus GN=Acsm5 PE=2 SV=1	32.47	5.58	525.3	1.39542e+06	19	14	3	25.95	578	394
>sp|Q99K67|AASS_MOUSE Alpha-aminoadipic semialdehyde synthase, mitochondrial OS=Mus musculus GN=Aass PE=2 SV=1	32.25	4.57	293.4	508602	18	17	6	15.55	926	142
>sp|P34914|HYES_MOUSE Epoxide hydrolase 2 OS=Mus musculus GN=Ephx2 PE=1 SV=2	32.22	5.8	528.5	509064	12	11	4	13.72	554	9668
>sp|P34914-2|HYES_MOUSE Isoform 2 of Epoxide hydrolase 2 OS=Mus musculus GN=Ephx2
>sp|Q91YW3|DNJC3_MOUSE DnaJ homolog subfamily C member 3 OS=Mus musculus GN=Dnajc3 PE=1 SV=1	31.13	3.98	443.1	979258	13	12	1	15.28	504	5885
>sp|P41216|ACSL1_MOUSE Long-chain-fatty-acid--CoA ligase 1 OS=Mus musculus GN=Acsl1 PE=1 SV=2	30.95	4.86	325.6	570763	20	17	4	17.88	699	379
>sp|P63038|CH60_MOUSE 60 kDa heat shock protein, mitochondrial OS=Mus musculus GN=Hspd1 PE=1 SV=1	30.47	4.85	398.3	1.07874e+06	16	14	2	19.02	573	3647
>sp|K1C10_HUMAN|(Common contaminant protein)	30.15	4.4	396.8	1.24354e+06	21	14	1	20.57	593	24150
>sp|P17563|SBP1_MOUSE Selenium-binding protein 1 OS=Mus musculus GN=Selenbp1 PE=1 SV=2	29.98	4.69	552.1	702920	14	12	2	22.88	472	18732
>sp|Q05920|PYC_MOUSE Pyruvate carboxylase, mitochondrial OS=Mus musculus GN=Pc PE=1 SV=1	29.91	4.47	423.8	749448	20	16	2	13.24	1178	16878
>sp|P50285|FMO1_MOUSE Dimethylaniline monooxygenase [N-oxide-forming] 1 OS=Mus musculus GN=Fmo1 PE=1 SV=1	29.47	4.06	431.6	515496	15	14	2	20.49	532	7689
>sp|Q01339|APOH_MOUSE Beta-2-glycoprotein 1 OS=Mus musculus GN=Apoh PE=1 SV=1	29.38	4.65	375.5	986734	17	12	1	32.17	345	1178
>sp|Q9Z0X1|AIFM1_MOUSE Apoptosis-inducing factor 1, mitochondrial OS=Mus musculus GN=Aifm1 PE=1 SV=1	28.87	5.3	370.1	644494	16	12	2	18.95	612	672
>sp|Q921G7|ETFD_MOUSE Electron transfer flavoprotein-ubiquinone oxidoreductase, mitochondrial OS=Mus musculus GN=Etfdh PE=1 SV=1	28.43	4.48	404.3	520317	15	13	3	19.16	616	6821
>sp|Q921I1|TRFE_MOUSE Serotransferrin OS=Mus musculus GN=Tf PE=1 SV=1	27.87	4.09	432.6	482943	14	13	1	18.08	697	22124
>sp|Q3ULD5|MCCB_MOUSE Methylcrotonoyl-CoA carboxylase beta chain, mitochondrial OS=Mus musculus GN=Mccc2 PE=2 SV=1	27.86	3.81	332.4	503616	13	12	3	23.8	563	12446
>sp|Q8JZN5|ACAD9_MOUSE Acyl-CoA dehydrogenase family member 9, mitochondrial OS=Mus musculus GN=Acad9 PE=2 SV=2	27.51	4.8	465.2	565776	16	14	4	17.12	625	257
>sp|Q9QXX4|CMC2_MOUSE Calcium-binding mitochondrial carrier protein Aralar2 OS=Mus musculus GN=Slc25a13 PE=1 SV=1	27.34	4.75	424.5	331660	9	8	1	12.28	676	4135
>sp|Q9QXE0|HACL1_MOUSE 2-hydroxyacyl-CoA lyase 1 OS=Mus musculus GN=Hacl1 PE=1 SV=2	27.3	4.42	427.8	825834	13	11	3	16.52	581	9039
>sp|Q61781|K1C14_MOUSE Keratin, type I cytoskeletal 14 OS=Mus musculus GN=Krt14 PE=1 SV=2	27.09	4.67	414.8	428729	11	11	2	14.67	484	10667
>sp|P08113|ENPL_MOUSE Endoplasmin OS=Mus musculus GN=Hsp90b1 PE=1 SV=2	27.03	4.69	346	995790	15	14	2	14.09	802	6598
>sp|P56480|ATPB_MOUSE ATP synthase subunit beta, mitochondrial OS=Mus musculus GN=Atp5b PE=1 SV=2	25.91	4.84	348.3	153528	7	7	3	11.91	529	1672
>sp|K22E_HUMAN|(Common contaminant protein)	25.64	3.84	332.6	987281	17	15	1	22.17	645	24164
>sp|P16332|MUTA_MOUSE Methylmalonyl-CoA mutase, mitochondrial OS=Mus musculus GN=Mut PE=2 SV=2	25.14	3.59	457.8	533060	14	12	2	15.11	748	13389
>sp|P32020|NLTP_MOUSE Non-specific lipid-transfer protein OS=Mus musculus GN=Scp2 PE=1 SV=3	24.98	3.9	351.7	565290	14	12	3	19.38	547	14127
>sp|Q9DC61|MPPA_MOUSE Mitochondrial-processing peptidase subunit alpha OS=Mus musculus GN=Pmpca PE=1 SV=1	24.16	4.57	382.6	594169	15	12	3	18.89	524	13110
>sp|P11725|OTC_MOUSE Ornithine carbamoyltransferase, mitochondrial OS=Mus musculus GN=Otc PE=1 SV=1	23.6	4.96	308.9	332176	12	8	1	18.08	354	14875
>sp|Q05421|CP2E1_MOUSE Cytochrome P450 2E1 OS=Mus musculus GN=Cyp2e1 PE=1 SV=1	22.46	3.62	388.1	802698	13	11	2	18.66	493	4580
>sp|Q8R086|SUOX_MOUSE Sulfite oxidase, mitochondrial OS=Mus musculus GN=Suox PE=1 SV=2	22.31	3.97	343.5	576553	8	7	0	13.55	546	20483
>sp|Q8R180|ERO1A_MOUSE ERO1-like protein alpha OS=Mus musculus GN=Ero1l PE=1 SV=2	22.3	8.49	651	725872	11	10	1	21.77	464	6752
>sp|Q8BWF0|SSDH_MOUSE Succinate-semialdehyde dehydrogenase, mitochondrial OS=Mus musculus GN=Aldh5a1 PE=1 SV=1	22.17	4.51	432.9	355495	8	8	1	18.16	523	20216
>sp|Q921X9|PDIA5_MOUSE Protein disulfide-isomerase A5 OS=Mus musculus GN=Pdia5 PE=2 SV=1	21.14	4.06	301.1	531005	11	10	1	18.38	517	15384
>sp|Q99KI0|ACON_MOUSE Aconitate hydratase, mitochondrial OS=Mus musculus GN=Aco2 PE=1 SV=1	20.91	4.64	372.6	257759	11	10	1	13.72	780	350
>sp|Q91X77|CY250_MOUSE Cytochrome P450 2C50 OS=Mus musculus GN=Cyp2c50 PE=1 SV=2	20.1	4.22	368.8	463681	12	12	3	21.43	490	5194
>sp|Q91X77-2|CY250_MOUSE Isoform 2 of Cytochrome P450 2C50 OS=Mus musculus GN=Cyp2c50
>sp|Q8BH86|CN159_MOUSE UPF0317 protein C14orf159 homolog, mitochondrial OS=Mus musculus PE=2 SV=1	20.03	4.78	308.1	219545	8	7	2	9.24	617	4178
>sp|Q8BH86-2|CN159_MOUSE Isoform 2 of UPF0317 protein C14orf159 homolog, mitochondrial OS=Mus musculus
>sp|Q60597-2|ODO1_MOUSE Isoform 2 of 2-oxoglutarate dehydrogenase, mitochondrial OS=Mus musculus GN=Ogdh	19.94	4.59	329.3	425856	11	11	1	9.28	1013	14671
>sp|Q60597-3|ODO1_MOUSE Isoform 3 of 2-oxoglutarate dehydrogenase, mitochondrial OS=Mus musculus GN=Ogdh
>sp|Q60597-4|ODO1_MOUSE Isoform 4 of 2-oxoglutarate dehydrogenase, mitochondrial OS=Mus musculus GN=Ogdh
>sp|Q64176|EST22_MOUSE Liver carboxylesterase 22 OS=Mus musculus GN=Es22 PE=1 SV=1	19.36	4.16	535.6	389209	8	7	1	12.28	562	6802
>sp|Q8K0E8|FIBB_MOUSE Fibrinogen beta chain OS=Mus musculus GN=Fgb PE=2 SV=1	19.25	4.04	292.8	463441	13	10	2	16.42	481	7600
>sp|Q91VA0|ACSM1_MOUSE Acyl-coenzyme A synthetase ACSM1, mitochondrial OS=Mus musculus GN=Acsm1 PE=1 SV=1	19.09	3.84	380.1	358423	8	7	1	8.9	573	386
>sp|P08249|MDHM_MOUSE Malate dehydrogenase, mitochondrial OS=Mus musculus GN=Mdh2 PE=1 SV=3	18.95	4.65	327.7	241937	7	6	1	16.57	338	12516
>sp|P29758|OAT_MOUSE Ornithine aminotransferase, mitochondrial OS=Mus musculus GN=Oat PE=1 SV=1	18.4	4.73	355.1	278953	8	7	2	17.08	439	14624
>sp|Q9Z2I8|SUCB2_MOUSE Succinyl-CoA ligase [GDP-forming] subunit beta, mitochondrial OS=Mus musculus GN=Suclg2 PE=2 SV=3	18.17	4.14	271.3	170766	7	7	0	18.01	433	20453
>sp|Q9Z2I8-2|SUCB2_MOUSE Isoform 2 of Succinyl-CoA ligase [GDP-forming] subunit beta, mitochondrial OS=Mus musculus GN=Suclg2
>sp|Q8CC88|K0564_MOUSE Uncharacterized protein KIAA0564 homolog OS=Mus musculus GN=Kiaa0564 PE=2 SV=2	17.76	4.39	286.4	395679	14	12	0	6.56	1905	10530
>sp|Q64435|UD16_MOUSE UDP-glucuronosyltransferase 1-6 OS=Mus musculus GN=Ugt1a6 PE=1 SV=1	17.61	3.99	423	480324	13	10	3	11.49	531	22846
>sp|Q8C165|P20D1_MOUSE Probable carboxypeptidase PM20D1 OS=Mus musculus GN=Pm20d1 PE=2 SV=1	17.4	5.29	467.6	196588	6	6	1	11.13	503	14936
>sp|P60710|ACTB_MOUSE Actin, cytoplasmic 1 OS=Mus musculus GN=Actb PE=1 SV=1	16.84	4.17	335.7	231072	7	7	3	18.93	375	400
>sp|P63260|ACTG_MOUSE Actin, cytoplasmic 2 OS=Mus musculus GN=Actg1 PE=1 SV=1
>sp|P23780|BGAL_MOUSE Beta-galactosidase OS=Mus musculus GN=Glb1 PE=2 SV=1	16.65	4.74	282.2	306501	13	8	1	10.97	647	1997
>sp|P50446|K2C6A_MOUSE Keratin, type II cytoskeletal 6A OS=Mus musculus GN=Krt6a PE=2 SV=3	16.05	3.87	395.2	333846	7	7	1	10.67	553	10704
>sp|Q9JMH6|TRXR1_MOUSE Thioredoxin reductase 1, cytoplasmic OS=Mus musculus GN=Txnrd1 PE=1 SV=3	16.01	3.96	295.5	366838	10	8	2	10.28	613	22298
>sp|Q9JMH6-2|TRXR1_MOUSE Isoform 2 of Thioredoxin reductase 1, cytoplasmic OS=Mus musculus GN=Txnrd1
>sp|Q922U2|K2C5_MOUSE Keratin, type II cytoskeletal 5 OS=Mus musculus GN=Krt5 PE=1 SV=1	15.98	3.81	405.6	556961	13	13	7	14.14	580	10703
>sp|Q571F8|GLSL_MOUSE Glutaminase liver isoform, mitochondrial OS=Mus musculus GN=Gls2 PE=2 SV=2	15.97	3.01	237	278916	10	9	3	9.97	602	8403
>sp|Q64458|CP2CT_MOUSE Cytochrome P450 2C29 OS=Mus musculus GN=Cyp2c29 PE=1 SV=2	15.73	3.84	365.8	456341	10	10	2	17.14	490	4575
>sp|Q8QZT1|THIL_MOUSE Acetyl-CoA acetyltransferase, mitochondrial OS=Mus musculus GN=Acat1 PE=1 SV=1	15.38	3.46	280.3	393718	11	8	3	16.04	424	21319
>sp|Q8VCC2|EST1_MOUSE Liver carboxylesterase 1 OS=Mus musculus GN=Ces1 PE=2 SV=1	15.32	3.93	486.6	339982	10	8	2	13.45	565	6801
>sp|Q8JZR0|ACSL5_MOUSE Long-chain-fatty-acid--CoA ligase 5 OS=Mus musculus GN=Acsl5 PE=2 SV=1	15.12	4.11	285.6	311086	9	8	2	9.66	683	383
>sp|Q9DBT9|M2GD_MOUSE Dimethylglycine dehydrogenase, mitochondrial OS=Mus musculus GN=Dmgdh PE=1 SV=1	14.95	4.81	483.8	739214	11	10	0	10.59	869	12140
>sp|Q8CGK3|LONM_MOUSE Lon protease homolog, mitochondrial OS=Mus musculus GN=Lonp1 PE=1 SV=2	14.94	3.43	306.8	395842	7	6	1	6.22	949	11779
>sp|P97501|FMO3_MOUSE Dimethylaniline monooxygenase [N-oxide-forming] 3 OS=Mus musculus GN=Fmo3 PE=1 SV=1	14.92	3.91	251.9	141253	6	5	0	10.3	534	7691
>sp|P11679|K2C8_MOUSE Keratin, type II cytoskeletal 8 OS=Mus musculus GN=Krt8 PE=1 SV=4	14.45	4.08	318.1	362705	10	9	1	16.73	490	10714
>sp|P61922|GABT_MOUSE 4-aminobutyrate aminotransferase, mitochondrial OS=Mus musculus GN=Abat PE=1 SV=1	14.26	3.91	299.9	235972	8	6	1	13.4	500	8029
>sp|P45952|ACADM_MOUSE Medium-chain specific acyl-CoA dehydrogenase, mitochondrial OS=Mus musculus GN=Acadm PE=1 SV=1	13.89	3.88	291.1	267173	7	7	1	15.44	421	259
>sp|P56593|CP2AC_MOUSE Cytochrome P450 2A12 OS=Mus musculus GN=Cyp2a12 PE=1 SV=2	13.81	5.42	292.8	295311	9	9	1	15.45	492	4570
>sp|Q99L13|3HIDH_MOUSE 3-hydroxyisobutyrate dehydrogenase, mitochondrial OS=Mus musculus GN=Hibadh PE=2 SV=1	13.8	4.86	259.1	47474.6	4	4	1	18.81	335	42
>sp|Q9JJL8|SYSM_MOUSE Serine--tRNA ligase, mitochondrial OS=Mus musculus GN=Sars2 PE=2 SV=2	13.68	3.33	323.2	203595	7	7	0	15.25	518	20631
>sp|P15392|CP2A4_MOUSE Cytochrome P450 2A4 OS=Mus musculus GN=Cyp2a4 PE=2 SV=2	13.25	3.91	302.4	132298	8	7	1	13.56	494	4568
>sp|P17717|UDB17_MOUSE UDP-glucuronosyltransferase 2B17 OS=Mus musculus GN=Ugt2b17 PE=2 SV=1	13.15	4	406.6	496924	8	5	0	8.68	530	22854
>sp|Q9DBG1|CP27A_MOUSE Sterol 26-hydroxylase, mitochondrial OS=Mus musculus GN=Cyp27a1 PE=1 SV=1	13.06	4.65	331.1	223497	6	5	2	6.57	533	4566
>sp|P56657|CP240_MOUSE Cytochrome P450 2C40 OS=Mus musculus GN=Cyp2c40 PE=2 SV=2	12.81	3.85	440.5	506113	9	9	1	13.24	491	4559
>sp|B7ZMP1|XPP3_MOUSE Probable Xaa-Pro aminopeptidase 3 OS=Mus musculus GN=Xpnpep3 PE=2 SV=1	12.75	3.86	357	172688	6	6	2	8.1	506	23546
>sp|Q9JHS4|CLPX_MOUSE ATP-dependent Clp protease ATP-binding subunit clpX-like, mitochondrial OS=Mus musculus GN=Clpx PE=1 SV=2	12.71	4.58	255.3	56775.7	5	4	0	7.57	634	4107
>sp|P47740|AL3A2_MOUSE Fatty aldehyde dehydrogenase OS=Mus musculus GN=Aldh3a2 PE=2 SV=2	12.71	4.88	304	261487	7	7	1	13.64	484	763
>sp|Q9Z2I9|SUCB1_MOUSE Succinyl-CoA ligase [ADP-forming] subunit beta, mitochondrial OS=Mus musculus GN=Sucla2 PE=1 SV=2	12.53	3.22	349	198514	6	6	1	12.1	463	20452
>sp|Q61247|A2AP_MOUSE Alpha-2-antiplasmin OS=Mus musculus GN=Serpinf2 PE=1 SV=1	12.47	3.29	235.6	181574	7	6	1	11.41	491	107
>sp|Q7TNG8|LDHD_MOUSE Probable D-lactate dehydrogenase, mitochondrial OS=Mus musculus GN=Ldhd PE=1 SV=1	12.46	4.5	406.3	334790	8	7	0	12.19	484	11555
>sp|Q8BGH2|SAM50_MOUSE Sorting and assembly machinery component 50 homolog OS=Mus musculus GN=Samm50 PE=1 SV=1	12.11	3.53	294.6	424163	7	6	1	11.73	469	18678
>sp|P37040|NCPR_MOUSE NADPH--cytochrome P450 reductase OS=Mus musculus GN=Por PE=1 SV=2	11.74	3.08	289.8	336827	9	9	0	12.54	678	13752
>sp|Q9CQF9|PCYOX_MOUSE Prenylcysteine oxidase OS=Mus musculus GN=Pcyox1 PE=1 SV=1	11.38	4.24	285.3	247272	4	4	1	6.34	505	15316
>sp|Q99LJ1|FUCO_MOUSE Tissue alpha-L-fucosidase OS=Mus musculus GN=Fuca1 PE=2 SV=1	11.36	3.7	292.9	239701	6	6	2	11.5	452	7906
>sp|O54782|MA2B2_MOUSE Epididymis-specific alpha-mannosidase OS=Mus musculus GN=Man2b2 PE=2 SV=2	11.28	3.36	256.1	201415	7	5	2	3.73	1018	12187
>sp|Q8VCM8|NCLN_MOUSE Nicalin OS=Mus musculus GN=Ncln PE=2 SV=2	11.11	3.99	335.6	242954	6	5	1	7.28	563	13729
>sp|Q9CZ13|QCR1_MOUSE Cytochrome b-c1 complex subunit 1, mitochondrial OS=Mus musculus GN=Uqcrc1 PE=1 SV=2	11.1	3.55	269.6	174805	7	6	1	12.71	480	16898
>sp|Q8BWT1|THIM_MOUSE 3-ketoacyl-CoA thiolase, mitochondrial OS=Mus musculus GN=Acaa2 PE=1 SV=3	10.85	3.13	335.8	250180	8	7	0	19.4	397	21320
>sp|Q9JHI5|IVD_MOUSE Isovaleryl-CoA dehydrogenase, mitochondrial OS=Mus musculus GN=Ivd PE=1 SV=1	10.8	4.02	323.8	124002	5	5	1	10.14	424	10421
>sp|Q7TMR0|PCP_MOUSE Lysosomal Pro-X carboxypeptidase OS=Mus musculus GN=Prcp PE=2 SV=2	10.69	4.41	518.6	460574	9	8	2	11	491	15287
>sp|Q922Q8|LRC59_MOUSE Leucine-rich repeat-containing protein 59 OS=Mus musculus GN=Lrrc59 PE=2 SV=1	10.68	4.01	333.2	124184	4	4	0	12.7	307	11903
>sp|Q9DCW4|ETFB_MOUSE Electron transfer flavoprotein subunit beta OS=Mus musculus GN=Etfb PE=1 SV=3	10.67	4.64	436.3	337300	8	6	0	22.75	255	6820
>sp|Q8BI84|MIA3_MOUSE Melanoma inhibitory activity protein 3 OS=Mus musculus GN=Mia3 PE=1 SV=2	10.67	4.39	253.8	231493	7	7	0	3.26	1930	12761
>sp|Q8BI84-3|MIA3_MOUSE Isoform 3 of Melanoma inhibitory activity protein 3 OS=Mus musculus GN=Mia3
>sp|P53395|ODB2_MOUSE Lipoamide acyltransferase component of branched-chain alpha-keto acid dehydrogenase complex, mitochondrial OS=Mus musculus GN=Dbt PE=2 SV=2	10.63	3.31	299.5	253549	7	7	2	13.07	482	14650
>sp|Q9WU79|PROD_MOUSE Proline dehydrogenase 1, mitochondrial OS=Mus musculus GN=Prodh PE=2 SV=2	10.6	4.57	256.9	179096	5	5	2	7.01	599	16488
>sp|E9Q557|DESP_MOUSE Desmoplakin OS=Mus musculus GN=Dsp PE=3 SV=1	10.57	3.97	324.5	281011	11	11	1	2.98	2883	5540
>sp|P58281|OPA1_MOUSE Dynamin-like 120 kDa protein, mitochondrial OS=Mus musculus GN=Opa1 PE=1 SV=1	10.36	4.42	352.4	205674	7	7	0	6.87	960	14792
>sp|P58281-2|OPA1_MOUSE Isoform 2 of Dynamin-like 120 kDa protein, mitochondrial OS=Mus musculus GN=Opa1
>sp|TRYP_PIG|(Common contaminant protein)	9.88	4.17	476.1	6.28472e+06	21	3	1	7.79	231	24193
>sp|Q9JMA7|CP341_MOUSE Cytochrome P450 3A41 OS=Mus musculus GN=Cyp3a41a PE=2 SV=2	9.77	4.21	372.9	311161	6	5	1	9.33	504	4589
>sp|Q9EP89|LACTB_MOUSE Serine beta-lactamase-like protein LACTB, mitochondrial OS=Mus musculus GN=Lactb PE=1 SV=1	9.62	4.32	352	81666.3	3	3	0	5.81	551	11426
>sp|Q71RI9|KAT3_MOUSE Kynurenine--oxoglutarate transaminase 3 OS=Mus musculus GN=Ccbl2 PE=1 SV=1	9.62	3.73	224.9	123147	5	5	1	10.55	455	10761
>sp|Q71RI9-2|KAT3_MOUSE Isoform 2 of Kynurenine--oxoglutarate transaminase 3 OS=Mus musculus GN=Ccbl2
>sp|Q922B2|SYDC_MOUSE Aspartate--tRNA ligase, cytoplasmic OS=Mus musculus GN=Dars PE=2 SV=2	9.6	3.26	264.8	228786	7	6	1	12.57	501	20552
>sp|Q61129|CFAI_MOUSE Complement factor I OS=Mus musculus GN=Cfi PE=1 SV=3	9.48	3.97	261.6	97230.7	4	4	0	7.79	603	3567
>sp|Q8BW75|AOFB_MOUSE Amine oxidase [flavin-containing] B OS=Mus musculus GN=Maob PE=1 SV=4	9.35	3.74	244.8	334712	8	8	2	13.85	520	1076
>sp|P09103|PDIA1_MOUSE Protein disulfide-isomerase OS=Mus musculus GN=P4hb PE=1 SV=2	8.82	3.65	220.6	82424.9	5	5	3	11	509	15379
>sp|P62192|PRS4_MOUSE 26S protease regulatory subunit 4 OS=Mus musculus GN=Psmc1 PE=1 SV=1	8.76	4.57	328.9	154709	4	4	0	9.55	440	16583
>sp|Q8BWQ1|UD2A3_MOUSE UDP-glucuronosyltransferase 2A3 OS=Mus musculus GN=Ugt2a3 PE=2 SV=1	8.71	3.92	444.9	365572	7	7	0	11.05	534	22851
>sp|Q9DCX2|ATP5H_MOUSE ATP synthase subunit d, mitochondrial OS=Mus musculus GN=Atp5h PE=1 SV=3	8.65	4.62	395.8	98679.4	3	3	0	17.39	161	1659
>sp|Q9CZW5|TOM70_MOUSE Mitochondrial import receptor subunit TOM70 OS=Mus musculus GN=Tomm70a PE=1 SV=2	8.49	3.26	315.9	201827	7	6	1	8.51	611	21945
>sp|Q63886|UD11_MOUSE UDP-glucuronosyltransferase 1-1 OS=Mus musculus GN=Ugt1a1 PE=2 SV=2	8.48	2.65	303.6	696092	11	8	2	8.22	535	22844
>sp|O35488|S27A2_MOUSE Very long-chain acyl-CoA synthetase OS=Mus musculus GN=Slc27a2 PE=1 SV=2	8.48	3.67	222	73971.9	5	3	1	5.97	620	18495
>sp|Q8JZZ0|UD3A2_MOUSE UDP-glucuronosyltransferase 3A2 OS=Mus musculus GN=Ugt3a2 PE=2 SV=2	8.44	3.71	406.5	313564	5	4	2	6.5	523	22853
>sp|Q922Q1|MOSC2_MOUSE MOSC domain-containing protein 2, mitochondrial OS=Mus musculus GN=Marc2 PE=1 SV=1	8.4	3.32	256.4	335957	6	6	1	14.2	338	13043
>sp|P25688|URIC_MOUSE Uricase OS=Mus musculus GN=Uox PE=1 SV=2	8.33	4.6	252.4	146627	4	4	0	12.87	303	22959
>sp|O35405|PLD3_MOUSE Phospholipase D3 OS=Mus musculus GN=Pld3 PE=2 SV=1	8.3	4.55	264.7	42839.4	2	2	0	4.3	488	15966
>sp|P05202|AATM_MOUSE Aspartate aminotransferase, mitochondrial OS=Mus musculus GN=Got2 PE=1 SV=1	8.3	3.52	260.3	245019	7	5	1	9.07	430	150
>sp|P67778|PHB_MOUSE Prohibitin OS=Mus musculus GN=Phb PE=1 SV=1	8.26	3.07	240.3	128166	4	4	0	15.07	272	15597
>sp|O08677-2|KNG1_MOUSE Isoform LMW of Kininogen-1 OS=Mus musculus GN=Kng1	8.25	4.33	261.2	46252.8	3	3	0	9.03	432	11218
>sp|O08677-3|KNG1_MOUSE Isoform 3 of Kininogen-1 OS=Mus musculus GN=Kng1
>sp|Q8VDD5|MYH9_MOUSE Myosin-9 OS=Mus musculus GN=Myh9 PE=1 SV=4	8.23	4	211.5	100171	5	5	2	1.94	1960	13453
>sp|Q8BFR5|EFTU_MOUSE Elongation factor Tu, mitochondrial OS=Mus musculus GN=Tufm PE=1 SV=1	8.16	4.11	310.6	85542.5	3	2	0	4.42	452	6401
>sp|Q8BFR5-2|EFTU_MOUSE Isoform 2 of Elongation factor Tu, mitochondrial OS=Mus musculus GN=Tufm
>sp|Q91YP2|NEUL_MOUSE Neurolysin, mitochondrial OS=Mus musculus GN=Nln PE=2 SV=1	7.98	3.41	249.2	105315	4	4	0	6.39	704	13926
>sp|Q9WUU7|CATZ_MOUSE Cathepsin Z OS=Mus musculus GN=Ctsz PE=2 SV=1	7.97	3.34	252.6	94401.4	3	3	1	9.48	306	2654
>sp|Q9DBW0|CP4V2_MOUSE Cytochrome P450 4V2 OS=Mus musculus GN=Cyp4v2 PE=1 SV=1	7.83	4.06	274.2	53048.1	3	3	0	6.67	525	4602
>sp|P51174|ACADL_MOUSE Long-chain specific acyl-CoA dehydrogenase, mitochondrial OS=Mus musculus GN=Acadl PE=2 SV=2	7.79	3.43	238.6	285070	6	6	2	11.4	430	258
>sp|Q3UEG6|AGT2_MOUSE Alanine--glyoxylate aminotransferase 2, mitochondrial OS=Mus musculus GN=Agxt2 PE=2 SV=1	7.25	3.28	264	89237.2	4	4	0	7.99	513	650
>sp|P14211|CALR_MOUSE Calreticulin OS=Mus musculus GN=Calr PE=1 SV=1	7.19	3.21	215.5	173302	7	4	0	10.58	416	2532
>sp|Q61207|SAP_MOUSE Sulfated glycoprotein 1 OS=Mus musculus GN=Psap PE=1 SV=2	7.01	3.54	257.2	41122.8	2	2	0	3.59	557	18694
>sp|P11983|TCPA_MOUSE T-complex protein 1 subunit alpha OS=Mus musculus GN=Tcp1 PE=1 SV=3	6.91	3.57	319.8	81322	4	3	0	5.04	556	21038
>sp|P11983-2|TCPA_MOUSE Isoform 2 of T-complex protein 1 subunit alpha OS=Mus musculus GN=Tcp1
>sp|P25911|LYN_MOUSE Tyrosine-protein kinase Lyn OS=Mus musculus GN=Lyn PE=1 SV=4	6.91	3.02	185.5	93254.7	5	5	1	8.2	512	12091
>sp|P25911-2|LYN_MOUSE Isoform 2 of Tyrosine-protein kinase Lyn OS=Mus musculus GN=Lyn
>sp|Q9JLT4|TRXR2_MOUSE Thioredoxin reductase 2, mitochondrial OS=Mus musculus GN=Txnrd2 PE=1 SV=4	6.77	4.5	371.5	64503	2	2	1	4.39	524	22300
>sp|Q9JLT4-3|TRXR2_MOUSE Isoform 3 of Thioredoxin reductase 2, mitochondrial OS=Mus musculus GN=Txnrd2
>sp|Q9JLT4-4|TRXR2_MOUSE Isoform 4 of Thioredoxin reductase 2, mitochondrial OS=Mus musculus GN=Txnrd2
>sp|Q9WTP6|KAD2_MOUSE Adenylate kinase 2, mitochondrial OS=Mus musculus GN=Ak2 PE=1 SV=5	6.66	3.33	239.6	124913	5	3	1	12.97	239	10724
>sp|Q9WTP6-2|KAD2_MOUSE Isoform 2 of Adenylate kinase 2, mitochondrial OS=Mus musculus GN=Ak2
>sp|P97742|CPT1A_MOUSE Carnitine O-palmitoyltransferase 1, liver isoform OS=Mus musculus GN=Cpt1a PE=2 SV=4	6.6	4.04	264.6	26493.2	2	2	1	2.72	773	4653
>sp|Q99LC5|ETFA_MOUSE Electron transfer flavoprotein subunit alpha, mitochondrial OS=Mus musculus GN=Etfa PE=1 SV=2	6.51	4.76	304.5	105529	6	5	1	19.22	333	6819
>sp|Q99JR5|TINAL_MOUSE Tubulointerstitial nephritis antigen-like OS=Mus musculus GN=Tinagl1 PE=1 SV=1	6.47	4.02	350.2	54596.8	3	3	0	7.73	466	21419
>sp|P51660|DHB4_MOUSE Peroxisomal multifunctional enzyme type 2 OS=Mus musculus GN=Hsd17b4 PE=1 SV=3	6.38	3.09	174.1	85751.2	5	4	0	7.07	735	5618
>sp|Q64464|CP3AD_MOUSE Cytochrome P450 3A13 OS=Mus musculus GN=Cyp3a13 PE=2 SV=1	6.37	3.24	263.5	101276	4	4	0	8.15	503	4592
>sp|Q920A7|AFG31_MOUSE AFG3-like protein 1 OS=Mus musculus GN=Afg3l1 PE=2 SV=2	6.28	3.97	380.4	130869	5	4	1	4.82	789	611
>sp|O35459|ECH1_MOUSE Delta(3,5)-Delta(2,4)-dienoyl-CoA isomerase, mitochondrial OS=Mus musculus GN=Ech1 PE=2 SV=1	6.25	3.64	293.6	188548	4	3	0	7.34	327	6293
>sp|Q6PB66|LPPRC_MOUSE Leucine-rich PPR motif-containing protein, mitochondrial OS=Mus musculus GN=Lrpprc PE=1 SV=2	6.08	2.5	230.3	244964	8	8	1	4.96	1392	11835
>sp|P97872|FMO5_MOUSE Dimethylaniline monooxygenase [N-oxide-forming] 5 OS=Mus musculus GN=Fmo5 PE=2 SV=4	5.85	3.22	221.9	72410.8	3	3	0	5.44	533	7693
>sp|Q91WD5|NDUS2_MOUSE NADH dehydrogenase [ubiquinone] iron-sulfur protein 2, mitochondrial OS=Mus musculus GN=Ndufs2 PE=1 SV=1	5.77	2.43	250.6	46624.6	3	3	0	5.83	463	13824
>sp|P20060|HEXB_MOUSE Beta-hexosaminidase subunit beta OS=Mus musculus GN=Hexb PE=2 SV=2	5.71	2.45	263.8	155329	4	4	2	6.72	536	9225
>sp|P52196|THTR_MOUSE Thiosulfate sulfurtransferase OS=Mus musculus GN=Tst PE=1 SV=3	5.7	2.9	218.1	173032	5	5	0	15.49	297	21351
>sp|Q9DC50|OCTC_MOUSE Peroxisomal carnitine O-octanoyltransferase OS=Mus musculus GN=Crot PE=1 SV=1	5.68	2.5	228.6	114590	4	4	1	4.58	612	14646
>sp|O08914|FAAH1_MOUSE Fatty-acid amide hydrolase 1 OS=Mus musculus GN=Faah PE=2 SV=1	5.66	2.32	216.5	87172.9	4	3	1	4.66	579	7256
>sp|Q9EP75|CP4FE_MOUSE Leukotriene-B4 omega-hydroxylase 3 OS=Mus musculus GN=Cyp4f14 PE=2 SV=1	5.58	3.15	308.2	196624	5	5	1	7.63	524	4601
>sp|Q9DB77|QCR2_MOUSE Cytochrome b-c1 complex subunit 2, mitochondrial OS=Mus musculus GN=Uqcrc2 PE=1 SV=1	5.58	5.23	239.3	98802.1	3	3	0	7.51	453	16899
>sp|Q07417|ACADS_MOUSE Short-chain specific acyl-CoA dehydrogenase, mitochondrial OS=Mus musculus GN=Acads PE=2 SV=2	5.46	3.11	184.2	42381	3	3	1	8.74	412	260
>sp|Q60932-2|VDAC1_MOUSE Isoform Mt-VDAC1 of Voltage-dependent anion-selective channel protein 1 OS=Mus musculus GN=Vdac1	5.37	2.7	212.5	48126.5	3	3	0	11.66	283	23092
>sp|Q9D2V7|CORO7_MOUSE Coronin-7 OS=Mus musculus GN=Coro7 PE=2 SV=2	5.35	4.03	263.3	145971	4	4	0	4.56	922	4477
>sp|Q9CQ62|DECR_MOUSE 2,4-dienoyl-CoA reductase, mitochondrial OS=Mus musculus GN=Decr1 PE=1 SV=1	5.31	3.52	349.3	73724.5	2	2	0	6.57	335	5473
>sp|Q4LDG0|S27A5_MOUSE Bile acyl-CoA synthetase OS=Mus musculus GN=Slc27a5 PE=2 SV=2	5.21	4.66	287.4	98269.5	4	3	0	4.06	689	18499
>sp|P33587|PROC_MOUSE Vitamin K-dependent protein C OS=Mus musculus GN=Proc PE=1 SV=2	5.2	3.89	281.9	71413.9	2	2	0	3.48	460	16486
>sp|Q9DD20|MET7B_MOUSE Methyltransferase-like protein 7B OS=Mus musculus GN=Mettl7b PE=2 SV=2	5.2	4.72	298.3	62931.2	3	3	0	10.25	244	12651
>sp|Q91W64|CP270_MOUSE Cytochrome P450 2C70 OS=Mus musculus GN=Cyp2c70 PE=2 SV=2	4.96	3.28	263	120028	4	3	0	6.34	489	4565
>sp|Q9Z2I0|LETM1_MOUSE LETM1 and EF-hand domain-containing protein 1, mitochondrial OS=Mus musculus GN=Letm1 PE=2 SV=1	4.95	2.67	162.8	47041.3	4	3	0	4.47	738	11594
>sp|Q60759|GCDH_MOUSE Glutaryl-CoA dehydrogenase, mitochondrial OS=Mus musculus GN=Gcdh PE=2 SV=2	4.86	3.78	307.1	56748.5	3	3	0	7.53	438	8163
>sp|P55096|ABCD3_MOUSE ATP-binding cassette sub-family D member 3 OS=Mus musculus GN=Abcd3 PE=1 SV=2	4.7	3.24	90.3	19170.7	2	2	1	4.4	659	179
>sp|O88451|RDH7_MOUSE Retinol dehydrogenase 7 OS=Mus musculus GN=Rdh7 PE=2 SV=1	4.69	2.74	197.6	109382	4	4	0	12.34	316	17297
>sp|P38060|HMGCL_MOUSE Hydroxymethylglutaryl-CoA lyase, mitochondrial OS=Mus musculus GN=Hmgcl PE=1 SV=2	4.65	2.53	170	83712.1	4	3	0	10.46	325	9332
>sp|P07901|HS90A_MOUSE Heat shock protein HSP 90-alpha OS=Mus musculus GN=Hsp90aa1 PE=1 SV=4	4.61	4.65	269.2	38846.6	2	1	0	1.91	733	9475
>sp|P11499|HS90B_MOUSE Heat shock protein HSP 90-beta OS=Mus musculus GN=Hsp90ab1 PE=1 SV=3
>sp|P56395|CYB5_MOUSE Cytochrome b5 OS=Mus musculus GN=Cyb5a PE=1 SV=2	4.54	4.02	293.1	126708	3	2	0	16.42	134	5201
>sp|P62196|PRS8_MOUSE 26S protease regulatory subunit 8 OS=Mus musculus GN=Psmc5 PE=1 SV=1	4.53	4.57	328.9	29757.5	1	1	0	2.96	406	16593
>sp|P97821|CATC_MOUSE Dipeptidyl peptidase 1 OS=Mus musculus GN=Ctsc PE=2 SV=1	4.52	4.53	245.9	82367.4	3	2	0	3.46	462	2640
>sp|Q8R164|BPHL_MOUSE Valacyclovir hydrolase OS=Mus musculus GN=Bphl PE=2 SV=1	4.49	4.5	247.3	41152.2	2	1	0	4.12	291	2117
>sp|Q99PL5|RRBP1_MOUSE Ribosome-binding protein 1 OS=Mus musculus GN=Rrbp1 PE=2 SV=2	4.42	3.15	204.5	60783.3	4	4	0	2.62	1605	18123
>sp|Q91X34|BAAT_MOUSE Bile acid-CoA:amino acid N-acyltransferase OS=Mus musculus GN=Baat PE=1 SV=1	4.41	3.93	226.7	118432	4	3	0	5.24	420	1823
>sp|P35564|CALX_MOUSE Calnexin OS=Mus musculus GN=Canx PE=1 SV=1	4.37	3.67	231.1	88255.5	3	3	0	4.23	591	2534
>sp|Q61941|NNTM_MOUSE NAD(P) transhydrogenase, mitochondrial OS=Mus musculus GN=Nnt PE=1 SV=2	4.35	4.44	256.5	18125.6	1	1	0	1.1	1086	14157
>sp|Q60936|ADCK3_MOUSE Chaperone activity of bc1 complex-like, mitochondrial OS=Mus musculus GN=Adck3 PE=2 SV=2	4.27	3.63	279.7	79173.1	3	3	0	4.19	645	505
>sp|Q6IFX2|K1C42_MOUSE Keratin, type I cytoskeletal 42 OS=Mus musculus GN=Krt42 PE=1 SV=1	4.25	2.53	165.4	82800.7	4	3	0	6.42	452	10682
>sp|Q9R0H0|ACOX1_MOUSE Peroxisomal acyl-coenzyme A oxidase 1 OS=Mus musculus GN=Acox1 PE=1 SV=5	4.2	4.25	328	21447.9	1	1	0	1.97	661	361
>sp|O35728|CP4AE_MOUSE Cytochrome P450 4A14 OS=Mus musculus GN=Cyp4a14 PE=2 SV=1	4.17	2.71	150.3	44925.8	3	3	1	6.51	507	4597
>sp|Q3TNA1|XYLB_MOUSE Xylulose kinase OS=Mus musculus GN=Xylb PE=2 SV=1	4.13	3.91	255.6	65000.8	2	2	0	3.09	551	23568
>sp|P50136|ODBA_MOUSE 2-oxoisovalerate dehydrogenase subunit alpha, mitochondrial OS=Mus musculus GN=Bckdha PE=1 SV=1	4.12	2.24	184.3	115063	4	4	1	8.14	442	14651
>sp|Q9CQH3|NDUB5_MOUSE NADH dehydrogenase [ubiquinone] 1 beta subcomplex subunit 5, mitochondrial OS=Mus musculus GN=Ndufb5 PE=1 SV=1	4.05	4.07	256.7	17330.8	1	1	0	5.82	189	13812
>sp|Q9DCU9|HOGA1_MOUSE Probable 4-hydroxy-2-oxoglutarate aldolase, mitochondrial OS=Mus musculus GN=Hoga1 PE=1 SV=1	4.02	3.84	253.5	56333.6	2	2	0	5.3	321	9394
>sp|P50172|DHI1_MOUSE Corticosteroid 11-beta-dehydrogenase isozyme 1 OS=Mus musculus GN=Hsd11b1 PE=1 SV=3	4.02	3.27	195.4	44485.4	2	2	0	7.53	292	5630
>sp|P12265|BGLR_MOUSE Beta-glucuronidase OS=Mus musculus GN=Gusb PE=2 SV=1	3.92	3.78	246.2	81269	3	2	0	2.93	648	2000
>sp|P10605|CATB_MOUSE Cathepsin B OS=Mus musculus GN=Ctsb PE=1 SV=2	3.92	3.94	321.3	25198.8	1	1	0	3.24	339	2639
>sp|P35486|ODPA_MOUSE Pyruvate dehydrogenase E1 component subunit alpha, somatic form, mitochondrial OS=Mus musculus GN=Pdha1 PE=1 SV=1	3.91	3.93	382	33966.4	2	2	1	4.87	390	14678
>sp|Q9D2G2|ODO2_MOUSE Dihydrolipoyllysine-residue succinyltransferase component of 2-oxoglutarate dehydrogenase complex, mitochondrial OS=Mus musculus GN=Dlst PE=1 SV=1	3.88	2.09	179.8	76882.4	3	3	0	6.17	454	14674
>sp|Q9D2G2-2|ODO2_MOUSE Isoform 2 of Dihydrolipoyllysine-residue succinyltransferase component of 2-oxoglutarate dehydrogenase complex, mitochondrial OS=Mus musculus GN=Dlst
>sp|P70158|ASM3A_MOUSE Acid sphingomyelinase-like phosphodiesterase 3a OS=Mus musculus GN=Smpdl3a PE=2 SV=2	3.86	2.2	263.2	183604	4	3	1	5.17	445	1495
>sp|P12791|CP2BA_MOUSE Cytochrome P450 2B10 OS=Mus musculus GN=Cyp2b10 PE=1 SV=1	3.83	3.25	271.4	135769	3	3	0	5	500	4572
>sp|P12791-2|CP2BA_MOUSE Isoform 2 of Cytochrome P450 2B10 OS=Mus musculus GN=Cyp2b10
>sp|Q61147|CERU_MOUSE Ceruloplasmin OS=Mus musculus GN=Cp PE=1 SV=2	3.73	3.71	147.3	91677.3	4	3	1	3.11	1061	3520
>sp|Q9QWR8|NAGAB_MOUSE Alpha-N-acetylgalactosaminidase OS=Mus musculus GN=Naga PE=2 SV=2	3.71	3.74	220.1	23821.4	1	1	0	2.65	415	13595
>sp|P14429|HA17_MOUSE H-2 class I histocompatibility antigen, Q7 alpha chain OS=Mus musculus GN=H2-Q7 PE=1 SV=1	3.71	2.24	185	114419	4	4	0	11.08	334	9002
>sp|P26150|3BHS3_MOUSE 3 beta-hydroxysteroid dehydrogenase/Delta 5-->4-isomerase type 3 OS=Mus musculus GN=Hsd3b3 PE=2 SV=3	3.71	3.74	228.6	21263.2	1	1	0	2.41	373	30
>sp|Q91WN4|KMO_MOUSE Kynurenine 3-monooxygenase OS=Mus musculus GN=Kmo PE=1 SV=1	3.69	2.72	221.5	77730.7	2	2	0	3.55	479	11214
>sp|Q91WN4-2|KMO_MOUSE Isoform 2 of Kynurenine 3-monooxygenase OS=Mus musculus GN=Kmo
>sp|P16381|DDX3L_MOUSE Putative ATP-dependent RNA helicase Pl10 OS=Mus musculus GN=D1Pas1 PE=1 SV=1	3.69	3.18	229.5	70491.2	3	2	0	2.73	660	5445
>sp|Q62167|DDX3X_MOUSE ATP-dependent RNA helicase DDX3X OS=Mus musculus GN=Ddx3x PE=1 SV=3
>sp|Q62095|DDX3Y_MOUSE ATP-dependent RNA helicase DDX3Y OS=Mus musculus GN=Ddx3y PE=1 SV=2
>sp|Q9D051|ODPB_MOUSE Pyruvate dehydrogenase E1 component subunit beta, mitochondrial OS=Mus musculus GN=Pdhb PE=1 SV=1	3.69	2.73	251.3	38877.8	2	2	0	5.29	359	14679
>sp|P18572|BASI_MOUSE Basigin OS=Mus musculus GN=Bsg PE=1 SV=2	3.67	3.7	296.4	36841.3	1	1	0	2.57	389	1879
>sp|P18572-2|BASI_MOUSE Isoform 2 of Basigin OS=Mus musculus GN=Bsg
>sp|P54071|IDHP_MOUSE Isocitrate dehydrogenase [NADP], mitochondrial OS=Mus musculus GN=Idh2 PE=1 SV=3	3.63	2.52	231.8	120553	3	3	0	6.64	452	9778
>sp|Q3URE1|ACSF3_MOUSE Acyl-CoA synthetase family member 3, mitochondrial OS=Mus musculus GN=Acsf3 PE=2 SV=2	3.61	3.53	206.6	50065.4	2	2	0	3.95	583	374
>sp|P51881|ADT2_MOUSE ADP/ATP translocase 2 OS=Mus musculus GN=Slc25a5 PE=1 SV=3	3.6	3.22	296.1	89530.7	2	2	0	5.7	298	570
>sp|P27786|CP17A_MOUSE Steroid 17-alpha-hydroxylase/17,20 lyase OS=Mus musculus GN=Cyp17a1 PE=2 SV=1	3.59	2.04	205.7	45093.5	2	2	0	3.94	507	4549
>sp|Q8K370|ACD10_MOUSE Acyl-CoA dehydrogenase family member 10 OS=Mus musculus GN=Acad10 PE=2 SV=1	3.59	3.65	233.6	53657.4	2	1	0	0.84	1069	284
>sp|Q9WTP7|KAD3_MOUSE GTP:AMP phosphotransferase, mitochondrial OS=Mus musculus GN=Ak3 PE=1 SV=3	3.42	2.53	228.4	70935.7	2	2	0	7.05	227	10726
>sp|P01029|CO4B_MOUSE Complement C4-B OS=Mus musculus GN=C4b PE=1 SV=3	3.41	2.51	119.6	42296.4	3	3	1	1.96	1738	4336
>sp|Q9DBE0|CSAD_MOUSE Cysteine sulfinic acid decarboxylase OS=Mus musculus GN=Csad PE=2 SV=1	3.4	2.11	136.5	90888.1	3	3	0	6.29	493	4871
>sp|Q9CQW3|PROZ_MOUSE Vitamin K-dependent protein Z OS=Mus musculus GN=Proz PE=1 SV=1	3.38	2.11	127.3	18572.2	2	2	0	6.52	399	16514
>sp|P26043|RADI_MOUSE Radixin OS=Mus musculus GN=Rdx PE=1 SV=3	3.37	2.64	333.3	238171	4	4	0	7.03	583	17049
>sp|Q99MR8|MCCA_MOUSE Methylcrotonoyl-CoA carboxylase subunit alpha, mitochondrial OS=Mus musculus GN=Mccc1 PE=2 SV=2	3.36	1.28	175	74654.3	4	3	1	4.18	717	12445
>sp|P62984|RL40_MOUSE Ubiquitin-60S ribosomal protein L40 OS=Mus musculus GN=Uba52 PE=1 SV=2	3.32	3.33	316.4	42350	1	1	0	7.03	128	17741
>sp|P62983|RS27A_MOUSE Ubiquitin-40S ribosomal protein S27a OS=Mus musculus GN=Rps27a PE=1 SV=2
>sp|P0CG49|UBB_MOUSE Polyubiquitin-B OS=Mus musculus GN=Ubb PE=1 SV=1
>sp|P0CG50|UBC_MOUSE Polyubiquitin-C OS=Mus musculus GN=Ubc PE=1 SV=2
>sp|UBIQ_HUMAN|(Common contaminant protein)
>sp|Q63880|EST31_MOUSE Liver carboxylesterase 31 OS=Mus musculus GN=Es31 PE=1 SV=2	3.24	3.02	202	57329	2	2	0	3.15	571	6803
>sp|Q63880-2|EST31_MOUSE Isoform 2 of Liver carboxylesterase 31 OS=Mus musculus GN=Es31
>sp|Q99JR1|SFXN1_MOUSE Sideroflexin-1 OS=Mus musculus GN=Sfxn1 PE=1 SV=3	3.19	3.21	188	8431	1	1	0	4.04	322	19117
>sp|P62814|VATB2_MOUSE V-type proton ATPase subunit B, brain isoform OS=Mus musculus GN=Atp6v1b2 PE=1 SV=1	3.19	2.45	214.8	48180.5	2	2	0	4.11	511	23065
>sp|P52430|PON1_MOUSE Serum paraoxonase/arylesterase 1 OS=Mus musculus GN=Pon1 PE=1 SV=2	3.18	3.19	269.7	64000.2	2	1	0	2.82	355	16163
>sp|Q61425|HCDH_MOUSE Hydroxyacyl-coenzyme A dehydrogenase, mitochondrial OS=Mus musculus GN=Hadh PE=1 SV=2	3.14	2.77	276.9	153634	2	2	0	4.46	314	9109
>sp|P12790|CP2B9_MOUSE Cytochrome P450 2B9 OS=Mus musculus GN=Cyp2b9 PE=2 SV=1	3.12	3.13	227.2	22194	2	1	0	1.83	491	4571
>sp|Q9DBL1|ACDSB_MOUSE Short/branched chain specific acyl-CoA dehydrogenase, mitochondrial OS=Mus musculus GN=Acadsb PE=1 SV=1	3.09	1.81	94	20011.9	2	2	0	6.02	432	286
>sp|P17156|HSP72_MOUSE Heat shock-related 70 kDa protein 2 OS=Mus musculus GN=Hspa2 PE=1 SV=2	3.07	3.09	137.9	26968.6	2	2	1	3.63	633	9496
>sp|Q8QZY2|GLCTK_MOUSE Glycerate kinase OS=Mus musculus GN=Glyctk PE=2 SV=1	3.07	1.88	277.7	78124.6	2	2	0	3.63	523	8352
>sp|Q6P3A8|ODBB_MOUSE 2-oxoisovalerate dehydrogenase subunit beta, mitochondrial OS=Mus musculus GN=Bckdhb PE=2 SV=2	2.97	1.42	129	55340	3	3	0	7.44	390	14652
>sp|Q6P3A8-2|ODBB_MOUSE Isoform 2 of 2-oxoisovalerate dehydrogenase subunit beta, mitochondrial OS=Mus musculus GN=Bckdhb
>sp|Q9D0M3|CY1_MOUSE Cytochrome c1, heme protein, mitochondrial OS=Mus musculus GN=Cyc1 PE=1 SV=1	2.95	2.02	269.9	45564.3	2	2	0	6.15	325	5189
>sp|Q9D0M3-2|CY1_MOUSE Isoform 2 of Cytochrome c1, heme protein, mitochondrial OS=Mus musculus GN=Cyc1
>sp|Q9QXC1|FETUB_MOUSE Fetuin-B OS=Mus musculus GN=Fetub PE=1 SV=1	2.93	2.9	154.7	29500.6	2	2	1	6.44	388	7506
>sp|P58252|EF2_MOUSE Elongation factor 2 OS=Mus musculus GN=Eef2 PE=1 SV=2	2.92	1.59	185.1	96574.6	3	3	0	3.61	858	6357
>sp|Q9D024|CC47_MOUSE Coiled-coil domain-containing protein 47 OS=Mus musculus GN=Ccdc47 PE=2 SV=2	2.88	2.74	313.1	66987.2	2	2	0	3.73	483	2893
>sp|P20918|PLMN_MOUSE Plasminogen OS=Mus musculus GN=Plg PE=1 SV=3	2.86	2.9	157.3	27769.2	2	1	0	1.48	812	16019
>sp|P17439|GLCM_MOUSE Glucosylceramidase OS=Mus musculus GN=Gba PE=1 SV=1	2.84	2.86	106	17851.5	2	1	0	2.52	515	8350
>sp|P70194|CLC4F_MOUSE C-type lectin domain family 4 member F OS=Mus musculus GN=Clec4f PE=1 SV=1	2.79	1.58	257.4	56053.8	2	2	0	3.83	548	3985
>sp|Q9CY50|SSRA_MOUSE Translocon-associated protein subunit alpha OS=Mus musculus GN=Ssr1 PE=1 SV=1	2.78	2.76	248.1	61026.8	3	1	0	3.85	286	20239
>sp|Q91VS7|MGST1_MOUSE Microsomal glutathione S-transferase 1 OS=Mus musculus GN=Mgst1 PE=1 SV=3	2.75	2.74	163.5	27051.9	2	1	0	8.39	155	12748
>Reverse >sp|P46471|PRS7_MOUSE 26S protease regulatory subunit 7 OS=Mus musculus GN=Psmc2 PE=1 SV=5	2.7	2.73	335.8	208949	1	1	0	1.85	433	40810
>Reverse >sp|Q9DB77|QCR2_MOUSE Cytochrome b-c1 complex subunit 2, mitochondrial OS=Mus musculus GN=Uqcrc2 PE=1 SV=1	2.67	2.71	231.1	166432	1	1	1	2.21	453	41117
>sp|P80318|TCPG_MOUSE T-complex protein 1 subunit gamma OS=Mus musculus GN=Cct3 PE=1 SV=1	2.66	2.69	200.6	44258.1	2	2	1	4.22	545	21043
>sp|P00184|CP1A1_MOUSE Cytochrome P450 1A1 OS=Mus musculus GN=Cyp1a1 PE=1 SV=2	2.66	2.7	189.1	17049.2	1	1	0	2.29	524	4551
>sp|P00186|CP1A2_MOUSE Cytochrome P450 1A2 OS=Mus musculus GN=Cyp1a2 PE=1 SV=1
>Reverse >sp|O54826|AF10_MOUSE Protein AF-10 OS=Mus musculus GN=Mllt10 PE=1 SV=2	2.64	2.73	244.3	94167.1	1	1	0	0.84	1068	24809
>sp|Q9D826|SOX_MOUSE Peroxisomal sarcosine oxidase OS=Mus musculus GN=Pipox PE=2 SV=1	2.62	2.65	207	16211.2	1	1	0	2.56	390	19831
>sp|Q60649|CLPB_MOUSE Caseinolytic peptidase B protein homolog OS=Mus musculus GN=Clpb PE=1 SV=1	2.6	1.36	116.1	50526.9	3	3	2	4.87	677	4104
>sp|P19221|THRB_MOUSE Prothrombin OS=Mus musculus GN=F2 PE=1 SV=1	2.58	2.08	217.5	101178	3	3	0	4.05	618	21342
>sp|Q02257|PLAK_MOUSE Junction plakoglobin OS=Mus musculus GN=Jup PE=1 SV=3	2.57	2.63	152.1	12467.3	1	1	0	1.61	745	15915
>sp|Q6GQT9|NOMO1_MOUSE Nodal modulator 1 OS=Mus musculus GN=Nomo1 PE=1 SV=1	2.55	2.65	199	24190.8	1	1	0	0.91	1214	14200
>sp|P16301|LCAT_MOUSE Phosphatidylcholine-sterol acyltransferase OS=Mus musculus GN=Lcat PE=1 SV=2	2.54	2.57	138.6	14670.4	1	1	0	2.51	438	11515
>sp|P00687|AMY1_MOUSE Alpha-amylase 1 OS=Mus musculus GN=Amy1 PE=1 SV=2	2.52	1.1	194.8	136873	3	3	1	4.7	511	875
>sp|Q8BGT5|ALAT2_MOUSE Alanine aminotransferase 2 OS=Mus musculus GN=Gpt2 PE=2 SV=1	2.52	1.5	202.5	227992	5	5	3	8.43	522	772
>sp|P70696|H2B1A_MOUSE Histone H2B type 1-A OS=Mus musculus GN=Hist1h2ba PE=2 SV=3	2.49	2.5	272.1	20674.2	1	1	0	7.09	127	8972
>sp|Q64475|H2B1B_MOUSE Histone H2B type 1-B OS=Mus musculus GN=Hist1h2bb PE=1 SV=3
>sp|Q6ZWY9|H2B1C_MOUSE Histone H2B type 1-C/E/G OS=Mus musculus GN=Hist1h2bc PE=1 SV=3
>sp|P10853|H2B1F_MOUSE Histone H2B type 1-F/J/L OS=Mus musculus GN=Hist1h2bf PE=1 SV=2
>sp|Q64478|H2B1H_MOUSE Histone H2B type 1-H OS=Mus musculus GN=Hist1h2bh PE=1 SV=3
>sp|Q8CGP1|H2B1K_MOUSE Histone H2B type 1-K OS=Mus musculus GN=Hist1h2bk PE=1 SV=3
>sp|P10854|H2B1M_MOUSE Histone H2B type 1-M OS=Mus musculus GN=Hist1h2bm PE=1 SV=2
>sp|Q8CGP2|H2B1P_MOUSE Histone H2B type 1-P OS=Mus musculus GN=Hist1h2bp PE=1 SV=3
>sp|Q8CGP2-2|H2B1P_MOUSE Isoform 2 of Histone H2B type 1-P OS=Mus musculus GN=Hist1h2bp
>sp|Q64525|H2B2B_MOUSE Histone H2B type 2-B OS=Mus musculus GN=Hist2h2bb PE=1 SV=3
>sp|Q64524|H2B2E_MOUSE Histone H2B type 2-E OS=Mus musculus GN=Hist2h2be PE=1 SV=3
>sp|Q9D2U9|H2B3A_MOUSE Histone H2B type 3-A OS=Mus musculus GN=Hist3h2ba PE=1 SV=3
>sp|Q8CGP0|H2B3B_MOUSE Histone H2B type 3-B OS=Mus musculus GN=Hist3h2bb PE=1 SV=3
>Reverse >sp|P10166|MYCL1_MOUSE Protein L-Myc-1 OS=Mus musculus GN=Mycl1 PE=1 SV=1	2.49	2.52	147.8	28895.5	1	1	1	3.53	368	37643
>sp|P20029|GRP78_MOUSE 78 kDa glucose-regulated protein OS=Mus musculus GN=Hspa5 PE=1 SV=3	2.49	1.6	43.8	24809.6	2	2	0	4.12	655	8806
>Reverse >sp|Q69ZA1|CDK13_MOUSE Cyclin-dependent kinase 13 OS=Mus musculus GN=Cdk13 PE=1 SV=3	2.47	2.56	256.7	79351.9	2	1	0	0.6	1511	27496
>Reverse >sp|Q69ZA1-2|CDK13_MOUSE Isoform 2 of Cyclin-dependent kinase 13 OS=Mus musculus GN=Cdk13
>sp|P58710|GGLO_MOUSE L-gulonolactone oxidase OS=Mus musculus GN=Gulo PE=1 SV=3	2.41	1.55	177.3	60071.5	2	2	1	4.09	440	8278
>Reverse >sp|P26039|TLN1_MOUSE Talin-1 OS=Mus musculus GN=Tln1 PE=1 SV=2	2.41	2.6	229.1	36135.5	1	1	0	0.39	2541	45685
>sp|Q9CQA3|DHSB_MOUSE Succinate dehydrogenase [ubiquinone] iron-sulfur subunit, mitochondrial OS=Mus musculus GN=Sdhb PE=1 SV=1	2.39	1.56	180.5	53980.5	2	2	0	6.03	282	5644
>sp|Q60930|VDAC2_MOUSE Voltage-dependent anion-selective channel protein 2 OS=Mus musculus GN=Vdac2 PE=1 SV=2	2.37	0.82	160	121740	4	4	0	12.88	295	23093
>sp|P70375|FA7_MOUSE Coagulation factor VII OS=Mus musculus GN=F7 PE=1 SV=1	2.37	2.4	243.8	32273.9	1	1	0	2.02	446	7231
>sp|O35490|BHMT1_MOUSE Betaine--homocysteine S-methyltransferase 1 OS=Mus musculus GN=Bhmt PE=2 SV=1	2.36	2.39	202.9	28171.7	1	1	0	2.46	407	2008
>sp|P20108|PRDX3_MOUSE Thioredoxin-dependent peroxide reductase, mitochondrial OS=Mus musculus GN=Prdx3 PE=1 SV=1	2.28	1.58	314.9	128654	2	2	0	5.84	257	16430
>sp|Q8CDG3|VCIP1_MOUSE Deubiquitinating protein VCIP135 OS=Mus musculus GN=Vcpip1 PE=2 SV=1	2.24	2.34	253.3	30951.1	1	1	0	0.57	1220	23089
>sp|Q8CDG3-2|VCIP1_MOUSE Isoform 2 of Deubiquitinating protein VCIP135 OS=Mus musculus GN=Vcpip1
>sp|Q61730|IL1AP_MOUSE Interleukin-1 receptor accessory protein OS=Mus musculus GN=Il1rap PE=1 SV=1	2.21	2.25	150.3	46683.6	2	2	0	2.98	570	9989
>sp|P16460|ASSY_MOUSE Argininosuccinate synthase OS=Mus musculus GN=Ass1 PE=1 SV=1	2.21	2.24	230.7	46806.4	1	1	0	1.94	412	1517
>sp|Q80XL6|ACD11_MOUSE Acyl-CoA dehydrogenase family member 11 OS=Mus musculus GN=Acad11 PE=1 SV=2	2.19	2.25	182	20497	1	1	0	1.16	779	285
>sp|Q99LC3|NDUAA_MOUSE NADH dehydrogenase [ubiquinone] 1 alpha subcomplex subunit 10, mitochondrial OS=Mus musculus GN=Ndufa10 PE=1 SV=1	2.18	2.21	178.9	78989.7	2	2	0	4.23	355	13805
>sp|Q8BLN5|ERG7_MOUSE Lanosterol synthase OS=Mus musculus GN=Lss PE=2 SV=2	2.11	2.15	187.3	49349.1	2	1	0	1.5	733	6724
>sp|Q9CW42|MOSC1_MOUSE MOSC domain-containing protein 1, mitochondrial OS=Mus musculus GN=Marc1 PE=1 SV=2	2.11	2.14	130.7	28811.4	1	1	0	3.53	340	13042
>sp|Q9D0F3|LMAN1_MOUSE Protein ERGIC-53 OS=Mus musculus GN=Lman1 PE=2 SV=1	2.06	1.72	213.9	103924	2	2	0	3.48	517	11722
>sp|A2ATU0|DHTK1_MOUSE Probable 2-oxoglutarate dehydrogenase E1 component DHKTD1, mitochondrial OS=Mus musculus GN=Dhtkd1 PE=2 SV=1	2.06	2.13	223.9	85946.4	2	2	0	1.41	921	5647
>Reverse >sp|P59913|PCMD1_MOUSE Protein-L-isoaspartate O-methyltransferase domain-containing protein 1 OS=Mus musculus GN=Pcmtd1 PE=2 SV=1	2.04	2.07	238.8	57141.9	1	1	0	1.96	357	39494
>sp|Q8BMS1|ECHA_MOUSE Trifunctional enzyme subunit alpha, mitochondrial OS=Mus musculus GN=Hadha PE=1 SV=1	2.03	1.67	179.3	112149	3	3	0	4.33	763	6294
>sp|Q6P9S7|GLT10_MOUSE Polypeptide N-acetylgalactosaminyltransferase 10 OS=Mus musculus GN=Galnt10 PE=2 SV=1	2	2.03	225.2	81251.2	2	2	1	2.82	603	8404
>sp|P09405|NUCL_MOUSE Nucleolin OS=Mus musculus GN=Ncl PE=1 SV=2	2	2.05	266.6	29484.9	1	1	0	1.27	707	14519
>sp|Q9WV86|KTNA1_MOUSE Katanin p60 ATPase-containing subunit A1 OS=Mus musculus GN=Katna1 PE=1 SV=1	1.94	1.98	299.2	107462	1	1	0	1.83	491	11343
>sp|Q99LB2|DHRS4_MOUSE Dehydrogenase/reductase SDR family member 4 OS=Mus musculus GN=Dhrs4 PE=2 SV=2	1.92	1.94	210.2	26051	1	1	0	2.87	279	5639
>Reverse >sp|P98083|SHC1_MOUSE SHC-transforming protein 1 OS=Mus musculus GN=Shc1 PE=1 SV=3	1.92	1.72	313.6	423720	13	1	0	1.38	579	43453
>sp|Q8BJ64|CHDH_MOUSE Choline dehydrogenase, mitochondrial OS=Mus musculus GN=Chdh PE=1 SV=1	1.9	0.95	211.5	121125	3	3	0	4.03	596	3672
>Reverse >sp|P56383|AT5G2_MOUSE ATP synthase lipid-binding protein, mitochondrial OS=Mus musculus GN=Atp5g2 PE=2 SV=2	1.9	1.91	269.7	66952.8	1	1	0	5.48	146	25790
>sp|Q9DCV4|RMD1_MOUSE Regulator of microtubule dynamics protein 1 OS=Mus musculus GN=Fam82b PE=2 SV=2	1.89	1.92	138.1	15889.6	1	1	0	3.61	305	17812
>sp|P00405|COX2_MOUSE Cytochrome c oxidase subunit 2 OS=Mus musculus GN=Mtco2 PE=1 SV=1	1.87	1.89	325.4	113225	1	1	0	3.08	227	4494
>sp|Q3UV17|K22O_MOUSE Keratin, type II cytoskeletal 2 oral OS=Mus musculus GN=Krt76 PE=2 SV=1	1.86	1.35	201.2	277509	6	4	2	5.22	594	10699
>sp|Q8R3S6|EXOC1_MOUSE Exocyst complex component 1 OS=Mus musculus GN=Exoc1 PE=2 SV=4	1.85	1.92	212.1	24960.4	1	1	0	1.23	894	6854
>sp|Q8VDK1|NIT1_MOUSE Nitrilase homolog 1 OS=Mus musculus GN=Nit1 PE=2 SV=2	1.84	1.87	211.7	17213.7	1	1	0	3.41	323	14074
>sp|Q8VDK1-2|NIT1_MOUSE Isoform 2 of Nitrilase homolog 1 OS=Mus musculus GN=Nit1
>sp|P25444|RS2_MOUSE 40S ribosomal protein S2 OS=Mus musculus GN=Rps2 PE=1 SV=3	1.83	1.85	182	31255.9	1	1	0	3.75	293	18184
>sp|Q8K182|CO8A_MOUSE Complement component C8 alpha chain OS=Mus musculus GN=C8a PE=2 SV=1	1.83	1.88	160.9	13255.1	1	1	0	1.87	587	4350
>sp|P01872|IGHM_MOUSE Ig mu chain C region secreted form OS=Mus musculus GN=Igh-6 PE=1 SV=2	1.82	1.85	218.6	57718.7	2	2	0	4.41	454	9921
>sp|P01873|MUCM_MOUSE Ig mu chain C region membrane-bound form OS=Mus musculus GN=Igh-6 PE=2 SV=3
>sp|Q8BX90|FND3A_MOUSE Fibronectin type-III domain-containing protein 3A OS=Mus musculus GN=Fndc3a PE=1 SV=3	1.8	1.62	150.1	66013.7	3	3	0	2.5	1198	7721
>sp|Q9D172|ES1_MOUSE ES1 protein homolog, mitochondrial OS=Mus musculus GN=D10Jhu81e PE=1 SV=1	1.8	0.96	192.1	62740.3	2	2	0	6.77	266	6762
>sp|Q9Z2Z6|MCAT_MOUSE Mitochondrial carnitine/acylcarnitine carrier protein OS=Mus musculus GN=Slc25a20 PE=1 SV=1	1.8	1.01	191	98104.5	3	3	0	9.3	301	12444
>sp|O35423|SPYA_MOUSE Serine--pyruvate aminotransferase, mitochondrial OS=Mus musculus GN=Agxt PE=1 SV=2	1.8	1.83	200.5	23629.5	1	1	0	2.42	413	20097
>sp|O35423-2|SPYA_MOUSE Isoform Peroxisomal of Serine--pyruvate aminotransferase, mitochondrial OS=Mus musculus GN=Agxt
>Reverse >sp|Q8C2K1|DEFI6_MOUSE Differentially expressed in FDCP 6 OS=Mus musculus GN=Def6 PE=1 SV=1	1.79	1.76	286.3	83421.1	2	2	0	2.86	630	29712
>sp|O08756|HCD2_MOUSE 3-hydroxyacyl-CoA dehydrogenase type-2 OS=Mus musculus GN=Hsd17b10 PE=1 SV=4	1.77	0.99	161	37173.6	2	2	0	9.2	261	9108
>sp|Q02819|NUCB1_MOUSE Nucleobindin-1 OS=Mus musculus GN=Nucb1 PE=1 SV=2	1.77	1.8	143.2	8870.3	1	1	0	2.61	459	14515
>sp|Q60766|IRGM1_MOUSE Immunity-related GTPase family M protein 1 OS=Mus musculus GN=Irgm1 PE=1 SV=1	1.76	1.52	160.4	42088.3	2	2	0	6.36	409	10274
>sp|Q60766-2|IRGM1_MOUSE Isoform 2 of Immunity-related GTPase family M protein 1 OS=Mus musculus GN=Irgm1
>sp|P54227|STMN1_MOUSE Stathmin OS=Mus musculus GN=Stmn1 PE=1 SV=2	1.72	1.74	85.9	6566.5	1	1	0	8.05	149	20375
>sp|Q6A078|CE290_MOUSE Centrosomal protein of 290 kDa OS=Mus musculus GN=Cep290 PE=1 SV=2	1.69	1.48	223.2	62271.8	2	2	0	0.73	2472	3393
>sp|Q5EBH1|RASF5_MOUSE Ras association domain-containing protein 5 OS=Mus musculus GN=Rassf5 PE=1 SV=1	1.66	1.69	155.3	16549.9	1	1	0	2.18	413	17117
>sp|Q5EBH1-2|RASF5_MOUSE Isoform 2 of Ras association domain-containing protein 5 OS=Mus musculus GN=Rassf5
>sp|A2AS89|SPEB_MOUSE Agmatinase, mitochondrial OS=Mus musculus GN=Agmat PE=2 SV=1	1.66	1.46	99.7	27372.1	2	2	2	2.79	358	19934
>sp|Q9D3R5|F187A_MOUSE Ig-like V-type domain-containing protein FAM187A OS=Mus musculus GN=Fam187a PE=2 SV=1	1.66	1.67	155.4	72850.8	2	1	0	1.44	417	7066
>Reverse >sp|Q571C7|BDP1_MOUSE Transcription factor TFIIIB component B'' homolog OS=Mus musculus GN=Bdp1 PE=2 SV=2	1.64	1.8	242.5	76007.7	2	1	0	0.49	2467	26182
>Reverse >sp|Q571C7-2|BDP1_MOUSE Isoform 2 of Transcription factor TFIIIB component B'' homolog OS=Mus musculus GN=Bdp1
>sp|Q8K1Z0|COQ9_MOUSE Ubiquinone biosynthesis protein COQ9, mitochondrial OS=Mus musculus GN=Coq9 PE=1 SV=1	1.64	1.64	217.8	46247.3	2	1	0	3.19	313	4465
>sp|Q3UZ09|C1RL_MOUSE Complement C1r subcomponent-like protein OS=Mus musculus GN=C1rl PE=1 SV=1	1.61	1.38	216.9	76469.9	2	2	0	4.36	482	2283
>sp|Q9CRB9|CHCH3_MOUSE Coiled-coil-helix-coiled-coil-helix domain-containing protein 3, mitochondrial OS=Mus musculus GN=Chchd3 PE=1 SV=1	1.59	1.61	252.2	59691.8	1	1	0	3.52	227	3656
>sp|Q99KB8|GLO2_MOUSE Hydroxyacylglutathione hydrolase, mitochondrial OS=Mus musculus GN=Hagh PE=2 SV=2	1.58	1.6	77	10181.9	1	1	0	3.88	309	8371
>sp|Q99KB8-2|GLO2_MOUSE Isoform 2 of Hydroxyacylglutathione hydrolase, mitochondrial OS=Mus musculus GN=Hagh
>sp|Q9DCM2|GSTK1_MOUSE Glutathione S-transferase kappa 1 OS=Mus musculus GN=Gstk1 PE=1 SV=3	1.58	1.13	161.5	77177.1	3	2	1	9.73	226	8861
>sp|Q8BH59|CMC1_MOUSE Calcium-binding mitochondrial carrier protein Aralar1 OS=Mus musculus GN=Slc25a12 PE=1 SV=1	1.56	1.29	202.3	57645.4	2	2	0	2.51	677	4134
>sp|Q9CZU6|CISY_MOUSE Citrate synthase, mitochondrial OS=Mus musculus GN=Cs PE=1 SV=1	1.53	0.98	126	52215.3	3	2	0	4.31	464	3812
>sp|O08807|PRDX4_MOUSE Peroxiredoxin-4 OS=Mus musculus GN=Prdx4 PE=1 SV=1	1.5	1.52	138.9	19651.5	1	1	0	3.65	274	16431
>sp|O55125|NIPS1_MOUSE Protein NipSnap homolog 1 OS=Mus musculus GN=Nipsnap1 PE=1 SV=1	1.5	1.52	222.2	46986	2	2	0	5.63	284	14065
>sp|Q91VC4|PLVAP_MOUSE Plasmalemma vesicle-associated protein OS=Mus musculus GN=Plvap PE=2 SV=1	1.48	1.51	66.3	12231.7	1	1	0	2.74	438	16050
>sp|Q9JIK5|DDX21_MOUSE Nucleolar RNA helicase 2 OS=Mus musculus GN=Ddx21 PE=1 SV=3	1.48	1.36	203.9	41171.5	2	2	1	2.23	851	5438
>sp|Q99NF1|BCDO2_MOUSE Beta,beta-carotene 9',10'-oxygenase OS=Mus musculus GN=Bco2 PE=1 SV=1	1.47	1.49	199.6	56965	2	1	0	1.69	532	1935
>sp|Q91W43|GCSP_MOUSE Glycine dehydrogenase [decarboxylating], mitochondrial OS=Mus musculus GN=Gldc PE=1 SV=1	1.46	1.54	191.5	37050.7	1	1	0	1.07	1025	8193
>Reverse >sp|O35551|RABE1_MOUSE Rab GTPase-binding effector protein 1 OS=Mus musculus GN=Rabep1 PE=1 SV=2	1.41	1.48	184.9	32974.4	1	1	0	1.16	862	41226
>Reverse >sp|O35551-2|RABE1_MOUSE Isoform 2 of Rab GTPase-binding effector protein 1 OS=Mus musculus GN=Rabep1
>Reverse >sp|O35551-3|RABE1_MOUSE Isoform 3 of Rab GTPase-binding effector protein 1 OS=Mus musculus GN=Rabep1
>Reverse >sp|O35551-4|RABE1_MOUSE Isoform 4 of Rab GTPase-binding effector protein 1 OS=Mus musculus GN=Rabep1
>Reverse >sp|O35551-5|RABE1_MOUSE Isoform 5 of Rab GTPase-binding effector protein 1 OS=Mus musculus GN=Rabep1
>Reverse >sp|O35551-6|RABE1_MOUSE Isoform 6 of Rab GTPase-binding effector protein 1 OS=Mus musculus GN=Rabep1
>sp|Q8CIM7|CP2DQ_MOUSE Cytochrome P450 2D26 OS=Mus musculus GN=Cyp2d26 PE=1 SV=1	1.4	1.26	121	58392.4	2	2	0	4.8	500	4579
>sp|Q91XP5|GLRA3_MOUSE Glycine receptor subunit alpha-3 OS=Mus musculus GN=Glra3 PE=2 SV=2	1.39	1.42	221.1	56882.8	1	1	1	2.16	464	8394
>sp|P01869|IGH1M_MOUSE Ig gamma-1 chain C region, membrane-bound form OS=Mus musculus GN=Ighg1 PE=1 SV=2	1.39	1.42	177.4	24359.3	1	1	0	2.54	393	9913
>sp|P01868|IGHG1_MOUSE Ig gamma-1 chain C region secreted form OS=Mus musculus GN=Ighg1 PE=1 SV=1
>sp|Q8K1R3|PNPT1_MOUSE Polyribonucleotide nucleotidyltransferase 1, mitochondrial OS=Mus musculus GN=Pnpt1 PE=1 SV=1	1.38	1.43	101.2	33408	2	2	1	2.3	783	16099
>sp|Q8K1R3-2|PNPT1_MOUSE Isoform 2 of Polyribonucleotide nucleotidyltransferase 1, mitochondrial OS=Mus musculus GN=Pnpt1
>sp|P01867|IGG2B_MOUSE Ig gamma-2B chain C region OS=Mus musculus GN=Igh-3 PE=1 SV=3	1.34	1.03	200.6	78155.8	2	2	0	4.21	404	9911
>sp|P01867-2|IGG2B_MOUSE Isoform 2 of Ig gamma-2B chain C region OS=Mus musculus GN=Igh-3
>sp|P11438|LAMP1_MOUSE Lysosome-associated membrane glycoprotein 1 OS=Mus musculus GN=Lamp1 PE=1 SV=2	1.33	1.37	134.4	21131.6	1	1	0	2.71	406	11449
>sp|Q8R2E9|ERO1B_MOUSE ERO1-like protein beta OS=Mus musculus GN=Ero1lb PE=2 SV=1	1.33	1.37	98.2	12225.3	1	1	0	2.57	467	6753
>Reverse >sp|Q8BIQ8|ZN770_MOUSE Zinc finger protein 770 OS=Mus musculus GN=Znf770 PE=2 SV=1	1.33	1.38	168.6	26009.3	1	1	1	1.13	705	48260
>Reverse >sp|Q6ZPF3|TIAM2_MOUSE T-lymphoma invasion and metastasis-inducing protein 2 OS=Mus musculus GN=Tiam2 PE=1 SV=2	1.33	1.45	239.6	78415.5	2	2	0	0.99	1715	45583
>Reverse >sp|Q6ZPF3-2|TIAM2_MOUSE Isoform 2 of T-lymphoma invasion and metastasis-inducing protein 2 OS=Mus musculus GN=Tiam2
>Reverse >sp|Q69ZM6|STK36_MOUSE Serine/threonine-protein kinase 36 OS=Mus musculus GN=Stk36 PE=1 SV=3	1.33	1.38	180.8	72797	4	1	0	0.61	1316	44580
>Reverse >sp|Q69ZM6-2|STK36_MOUSE Isoform 2 of Serine/threonine-protein kinase 36 OS=Mus musculus GN=Stk36
>Reverse >sp|Q69ZM6-3|STK36_MOUSE Isoform 3 of Serine/threonine-protein kinase 36 OS=Mus musculus GN=Stk36
>sp|Q9CXT8|MPPB_MOUSE Mitochondrial-processing peptidase subunit beta OS=Mus musculus GN=Pmpcb PE=2 SV=1	1.32	1.34	167.9	35641.9	2	1	0	2.45	489	13111
>sp|Q6P5D8|SMHD1_MOUSE Structural maintenance of chromosomes flexible hinge domain-containing protein 1 OS=Mus musculus GN=Smchd1 PE=2 SV=2	1.32	1.48	243.2	69028.3	1	1	0	0.4	2007	19587
>sp|Q8VCB3|GYS2_MOUSE Glycogen [starch] synthase, liver OS=Mus musculus GN=Gys2 PE=1 SV=2	1.32	1.38	94.3	15802.8	1	1	1	1.7	704	8943
>sp|Q8BU14|SEC62_MOUSE Translocation protein SEC62 OS=Mus musculus GN=Sec62 PE=1 SV=1	1.32	0.86	195.4	79207	3	3	0	7.04	398	18938
>sp|Q9CY62|RN181_MOUSE E3 ubiquitin-protein ligase RNF181 OS=Mus musculus GN=Rnf181 PE=2 SV=1	1.32	1.33	202.9	22649.8	1	1	0	4.85	165	17871
>sp|Q9CY62-2|RN181_MOUSE Isoform 2 of E3 ubiquitin-protein ligase RNF181 OS=Mus musculus GN=Rnf181
>sp|B2RPV6|MMRN1_MOUSE Multimerin-1 OS=Mus musculus GN=Mmrn1 PE=2 SV=2	1.31	1.4	118.7	25117.3	1	1	1	0.74	1210	12960
>Reverse >sp|Q3V079|CN045_MOUSE Uncharacterized protein C14orf45 homolog OS=Mus musculus PE=2 SV=2	1.31	1.35	245	35924.2	1	1	0	1.31	533	28381
>sp|Q9CRC0|VKOR1_MOUSE Vitamin K epoxide reductase complex subunit 1 OS=Mus musculus GN=Vkorc1 PE=2 SV=1	1.3	1.31	57.4	12825.2	1	1	0	8.07	161	23155
>sp|Q8BX46|SKOR1_MOUSE SKI family transcriptional corepressor 1 OS=Mus musculus GN=Skor1 PE=1 SV=2	1.29	1.11	307.9	646215	3	3	0	2.9	964	19432
>sp|Q8BX46-2|SKOR1_MOUSE Isoform 2 of SKI family transcriptional corepressor 1 OS=Mus musculus GN=Skor1
>sp|Q8BGA8-2|ACSM5_MOUSE Isoform 2 of Acyl-coenzyme A synthetase ACSM5, mitochondrial OS=Mus musculus GN=Acsm5	1.28	1.3	107.6	11485.4	1	1	0	3.22	311	395
>sp|O88327|CTNL1_MOUSE Alpha-catulin OS=Mus musculus GN=Ctnnal1 PE=2 SV=1	1.28	1.33	132.7	18675.5	1	1	1	1.37	731	5037
>sp|Q8BG07|PLD4_MOUSE Phospholipase D4 OS=Mus musculus GN=Pld4 PE=2 SV=1	1.26	1.3	212.2	18007.3	1	1	0	1.39	503	15967
>sp|Q8BG07-2|PLD4_MOUSE Isoform 2 of Phospholipase D4 OS=Mus musculus GN=Pld4
>sp|Q64514|TPP2_MOUSE Tripeptidyl-peptidase 2 OS=Mus musculus GN=Tpp2 PE=2 SV=3	1.25	1.33	244.1	64524.1	2	1	0	0.71	1262	22021
>sp|Q64514-2|TPP2_MOUSE Isoform Short of Tripeptidyl-peptidase 2 OS=Mus musculus GN=Tpp2
>sp|Q64521|GPDM_MOUSE Glycerol-3-phosphate dehydrogenase, mitochondrial OS=Mus musculus GN=Gpd2 PE=1 SV=2	1.24	1.29	142.7	25067.5	1	1	0	1.38	727	8603
>Reverse >sp|Q6PHB0|I20RA_MOUSE Interleukin-20 receptor subunit alpha OS=Mus musculus GN=Il20ra PE=2 SV=2	1.23	1.27	233.6	43849.6	1	1	0	1.28	546	33925
>sp|O35857|TIM44_MOUSE Mitochondrial import inner membrane translocase subunit TIM44 OS=Mus musculus GN=Timm44 PE=2 SV=2	1.23	1.26	190.3	17739.2	1	1	0	2.21	452	21401
>sp|Q8K0C4|CP51A_MOUSE Lanosterol 14-alpha demethylase OS=Mus musculus GN=Cyp51a1 PE=2 SV=1	1.22	1.26	57.8	12772.1	1	1	0	2.39	503	4603
>Reverse >sp|Q99LB7|SARDH_MOUSE Sarcosine dehydrogenase, mitochondrial OS=Mus musculus GN=Sardh PE=1 SV=1	1.22	1.29	166.7	20104.6	1	1	0	0.98	919	42916
>sp|Q7TMM9|TBB2A_MOUSE Tubulin beta-2A chain OS=Mus musculus GN=Tubb2a PE=1 SV=1	1.21	1.24	29.5	4961.4	1	1	1	3.37	445	20906
>sp|Q9CWF2|TBB2B_MOUSE Tubulin beta-2B chain OS=Mus musculus GN=Tubb2b PE=1 SV=1
>sp|Q9ERD7|TBB3_MOUSE Tubulin beta-3 chain OS=Mus musculus GN=Tubb3 PE=1 SV=1
>sp|P99024|TBB5_MOUSE Tubulin beta-5 chain OS=Mus musculus GN=Tubb5 PE=1 SV=1
>sp|Q9R0Q1|SYTL4_MOUSE Synaptotagmin-like protein 4 OS=Mus musculus GN=Sytl4 PE=1 SV=1	1.2	0.97	394.9	299548	4	2	2	1.49	673	20671
>sp|Q9R0Q1-2|SYTL4_MOUSE Isoform 2 of Synaptotagmin-like protein 4 OS=Mus musculus GN=Sytl4
>sp|Q9R0Q1-3|SYTL4_MOUSE Isoform 3 of Synaptotagmin-like protein 4 OS=Mus musculus GN=Sytl4
>sp|Q91YT0|NDUV1_MOUSE NADH dehydrogenase [ubiquinone] flavoprotein 1, mitochondrial OS=Mus musculus GN=Ndufv1 PE=1 SV=1	1.19	1.17	215	125592	3	2	0	3.02	464	13831
>Reverse >sp|Q60675|LAMA2_MOUSE Laminin subunit alpha-2 OS=Mus musculus GN=Lama2 PE=1 SV=1	1.18	0.96	106.9	57602.2	2	2	1	0.68	3106	35656
>sp|Q91VR2|ATPG_MOUSE ATP synthase subunit gamma, mitochondrial OS=Mus musculus GN=Atp5c1 PE=1 SV=1	1.15	0.91	215.6	53972.1	2	2	0	6.38	298	1676
>sp|Q8VCU1|ES31L_MOUSE Liver carboxylesterase 31-like OS=Mus musculus GN=Gm4738 PE=2 SV=1	1.15	0.95	126.7	45534.3	2	2	0	3.52	568	6763
>sp|Q8VCU1-2|ES31L_MOUSE Isoform 2 of Liver carboxylesterase 31-like OS=Mus musculus GN=Gm4738
>sp|O70439|STX7_MOUSE Syntaxin-7 OS=Mus musculus GN=Stx7 PE=1 SV=3	1.15	0.92	169	110295	2	2	2	3.45	261	20432
>Reverse >sp|Q6NZL8|SCUB1_MOUSE Signal peptide, CUB and EGF-like domain-containing protein 1 OS=Mus musculus GN=Scube1 PE=2 SV=2	1.14	1.22	111.1	21470.6	1	1	1	0.98	1018	43095
>Reverse >sp|Q6NZL8-2|SCUB1_MOUSE Isoform 2 of Signal peptide, CUB and EGF-like domain-containing protein 1 OS=Mus musculus GN=Scube1
>Reverse >sp|Q6NZL8-3|SCUB1_MOUSE Isoform 3 of Signal peptide, CUB and EGF-like domain-containing protein 1 OS=Mus musculus GN=Scube1

## Sheet: Spot 2
Description	|Log Prob|	Best |Log Prob|	Best score	Total Intensity	# of spectra	# of unique peptides	# of mod peptides	Coverage %	# AA's in protein	Protein DB number
>sp|Q03265|ATPA_MOUSE ATP synthase subunit alpha, mitochondrial OS=Mus musculus GN=Atp5a1 PE=1 SV=1	148.41	8.74	651.5	2.26184e+07	119	51	15	47.92	553	1671
>sp|Q8C196|CPSM_MOUSE Carbamoyl-phosphate synthase [ammonia], mitochondrial OS=Mus musculus GN=Cps1 PE=1 SV=2	142.86	7.79	610.9	5.78149e+06	80	58	12	29.4	1500	4652
>sp|P47738|ALDH2_MOUSE Aldehyde dehydrogenase, mitochondrial OS=Mus musculus GN=Aldh2 PE=1 SV=1	120.24	9.84	689.5	6.65292e+07	402	41	9	54.34	519	776
>sp|Q9EQ20|MMSA_MOUSE Methylmalonate-semialdehyde dehydrogenase [acylating], mitochondrial OS=Mus musculus GN=Aldh6a1 PE=1 SV=1	113.12	7.01	588.6	1.88856e+07	106	41	16	46.73	535	12968
>sp|Q9DBF1|AL7A1_MOUSE Alpha-aminoadipic semialdehyde dehydrogenase OS=Mus musculus GN=Aldh7a1 PE=1 SV=4	95.63	9.84	656.5	1.33432e+07	61	28	9	37.48	539	767
>sp|Q9CZS1|AL1B1_MOUSE Aldehyde dehydrogenase X, mitochondrial OS=Mus musculus GN=Aldh1b1 PE=2 SV=1	89.71	8.84	632.7	9.46422e+06	58	33	7	41.43	519	754
>sp|P26443|DHE3_MOUSE Glutamate dehydrogenase 1, mitochondrial OS=Mus musculus GN=Glud1 PE=1 SV=1	88.18	7.08	552.5	7.95519e+06	69	35	10	38.89	558	5628
>sp|P50544|ACADV_MOUSE Very long-chain specific acyl-CoA dehydrogenase, mitochondrial OS=Mus musculus GN=Acadvl PE=1 SV=3	80.1	4.27	452.9	3.40987e+06	35	26	6	33.08	656	261
>sp|Q9JLJ2|AL9A1_MOUSE 4-trimethylaminobutyraldehyde dehydrogenase OS=Mus musculus GN=Aldh9a1 PE=1 SV=1	79.62	5.89	578.3	4.17684e+06	39	27	8	42.91	494	770
>sp|P24270|CATA_MOUSE Catalase OS=Mus musculus GN=Cat PE=1 SV=4	74.56	5.95	515.3	4.95093e+06	41	31	7	41.37	527	2638
>sp|K2C1_HUMAN|(Common contaminant protein)	69.62	7.79	634	3.69025e+06	34	27	4	31.26	643	24165
>sp|Q99LB7|SARDH_MOUSE Sarcosine dehydrogenase, mitochondrial OS=Mus musculus GN=Sardh PE=1 SV=1	53.75	5.58	482.3	2.50238e+06	34	27	4	25.68	919	18698
>sp|K1C10_HUMAN|(Common contaminant protein)	52.21	5.13	400.2	5.0513e+06	32	26	4	29.85	593	24150
>sp|O08749|DLDH_MOUSE Dihydrolipoyl dehydrogenase, mitochondrial OS=Mus musculus GN=Dld PE=1 SV=2	47.45	8.79	682.8	6.92637e+06	41	22	6	28.68	509	5743
>sp|K22E_HUMAN|(Common contaminant protein)	47.25	5.22	445.7	1.61668e+06	20	17	2	29.46	645	24164
>sp|Q9CPY7|AMPL_MOUSE Cytosol aminopeptidase OS=Mus musculus GN=Lap3 PE=1 SV=3	46.14	5.19	491.3	2.33268e+06	31	22	5	37.76	519	857
>sp|P32261|ANT3_MOUSE Antithrombin-III OS=Mus musculus GN=Serpinc1 PE=1 SV=1	44.41	5.21	383.9	1.89092e+06	24	17	2	30.32	465	1054
>sp|Q8CHT0|AL4A1_MOUSE Delta-1-pyrroline-5-carboxylate dehydrogenase, mitochondrial OS=Mus musculus GN=Aldh4a1 PE=1 SV=3	44.28	6.76	529.2	2.66726e+06	26	18	6	23.49	562	765
>sp|Q8BWF0|SSDH_MOUSE Succinate-semialdehyde dehydrogenase, mitochondrial OS=Mus musculus GN=Aldh5a1 PE=1 SV=1	41.91	5.31	429.4	1.64438e+06	23	18	4	24.67	523	20216
>sp|Q8VCW8|ACSF2_MOUSE Acyl-CoA synthetase family member 2, mitochondrial OS=Mus musculus GN=Acsf2 PE=2 SV=1	40.25	5.65	422.6	717651	13	11	3	19.35	615	373
>sp|Q8CAQ8|IMMT_MOUSE Mitochondrial inner membrane protein OS=Mus musculus GN=Immt PE=1 SV=1	40.22	4.19	386.4	1.93713e+06	25	22	2	24.7	757	10076
>sp|Q8CAQ8-2|IMMT_MOUSE Isoform 2 of Mitochondrial inner membrane protein OS=Mus musculus GN=Immt
>sp|Q8CAQ8-5|IMMT_MOUSE Isoform 5 of Mitochondrial inner membrane protein OS=Mus musculus GN=Immt
>sp|Q8K2B3|DHSA_MOUSE Succinate dehydrogenase [ubiquinone] flavoprotein subunit, mitochondrial OS=Mus musculus GN=Sdha PE=1 SV=1	38.75	6.79	598.7	2000435	17	15	5	22.29	664	5643
>sp|Q99MN9|PCCB_MOUSE Propionyl-CoA carboxylase beta chain, mitochondrial OS=Mus musculus GN=Pccb PE=1 SV=2	38.5	5.41	477.6	839127	15	12	1	25.69	541	15240
>sp|Q8VCT4|CES3_MOUSE Carboxylesterase 3 OS=Mus musculus GN=Ces3 PE=1 SV=1	36.62	4.61	510.6	2.07864e+06	19	14	3	18.23	565	3521
>sp|P63038|CH60_MOUSE 60 kDa heat shock protein, mitochondrial OS=Mus musculus GN=Hspd1 PE=1 SV=1	36.04	4.54	536.6	896054	12	11	2	23.04	573	3647
>sp|P27773|PDIA3_MOUSE Protein disulfide-isomerase A3 OS=Mus musculus GN=Pdia3 PE=1 SV=2	35.79	4.86	388.9	1.35385e+06	21	17	2	31.09	505	15382
>sp|P38647|GRP75_MOUSE Stress-70 protein, mitochondrial OS=Mus musculus GN=Hspa9 PE=1 SV=2	32.72	5.66	464.4	1.11856e+06	18	15	2	20.47	679	8805
>sp|P54869|HMCS2_MOUSE Hydroxymethylglutaryl-CoA synthase, mitochondrial OS=Mus musculus GN=Hmgcs2 PE=1 SV=2	31.54	4.92	465.2	1.91773e+06	16	15	1	24.21	508	9320
>sp|Q05920|PYC_MOUSE Pyruvate carboxylase, mitochondrial OS=Mus musculus GN=Pc PE=1 SV=1	30.75	4.22	474.7	1.09454e+06	17	16	2	14.35	1178	16878
>sp|Q91ZA3|PCCA_MOUSE Propionyl-CoA carboxylase alpha chain, mitochondrial OS=Mus musculus GN=Pcca PE=2 SV=2	30.22	4.62	317.5	771559	16	13	4	15.47	724	15239
>sp|P20060|HEXB_MOUSE Beta-hexosaminidase subunit beta OS=Mus musculus GN=Hexb PE=2 SV=2	29.57	3.73	346	1.35628e+06	18	14	2	22.76	536	9225
>sp|Q01339|APOH_MOUSE Beta-2-glycoprotein 1 OS=Mus musculus GN=Apoh PE=1 SV=1	28.82	5.09	419.8	776037	14	10	0	29.85	345	1178
>sp|Q921I1|TRFE_MOUSE Serotransferrin OS=Mus musculus GN=Tf PE=1 SV=1	28.73	5.05	519.8	550354	13	11	1	16.07	697	22124
>sp|P50285|FMO1_MOUSE Dimethylaniline monooxygenase [N-oxide-forming] 1 OS=Mus musculus GN=Fmo1 PE=1 SV=1	26.65	5.33	394.5	819782	13	12	2	17.86	532	7689
>sp|P41216|ACSL1_MOUSE Long-chain-fatty-acid--CoA ligase 1 OS=Mus musculus GN=Acsl1 PE=1 SV=2	26.58	3.73	381.4	1.27554e+06	17	15	4	18.45	699	379
>sp|Q9JJL8|SYSM_MOUSE Serine--tRNA ligase, mitochondrial OS=Mus musculus GN=Sars2 PE=2 SV=2	26.1	4.74	346.2	642066	13	10	1	24.13	518	20631
>sp|Q9QXX4|CMC2_MOUSE Calcium-binding mitochondrial carrier protein Aralar2 OS=Mus musculus GN=Slc25a13 PE=1 SV=1	26.1	4.32	384.5	565896	10	8	1	11.69	676	4135
>sp|Q64435|UD16_MOUSE UDP-glucuronosyltransferase 1-6 OS=Mus musculus GN=Ugt1a6 PE=1 SV=1	26.04	4.57	506.6	1.34576e+06	18	12	4	14.69	531	22846
>sp|Q9Z0X1|AIFM1_MOUSE Apoptosis-inducing factor 1, mitochondrial OS=Mus musculus GN=Aifm1 PE=1 SV=1	25.3	5.33	389.5	838872	16	10	1	19.12	612	672
>sp|Q9CQN1|TRAP1_MOUSE Heat shock protein 75 kDa, mitochondrial OS=Mus musculus GN=Trap1 PE=1 SV=1	25.26	5.24	394.6	435574	9	9	0	14.59	706	22105
>sp|P11725|OTC_MOUSE Ornithine carbamoyltransferase, mitochondrial OS=Mus musculus GN=Otc PE=1 SV=1	24.34	4.26	457.4	843786	15	12	3	30.79	354	14875
>sp|Q3ULD5|MCCB_MOUSE Methylcrotonoyl-CoA carboxylase beta chain, mitochondrial OS=Mus musculus GN=Mccc2 PE=2 SV=1	23.79	3.72	352.8	676720	15	12	3	20.6	563	12446
>sp|Q99K67|AASS_MOUSE Alpha-aminoadipic semialdehyde synthase, mitochondrial OS=Mus musculus GN=Aass PE=2 SV=1	23.78	4.27	322.3	905612	13	12	2	12.31	926	142
>sp|Q05421|CP2E1_MOUSE Cytochrome P450 2E1 OS=Mus musculus GN=Cyp2e1 PE=1 SV=1	23.08	4.13	397.9	1.07516e+06	14	11	3	17.44	493	4580
>sp|P25911|LYN_MOUSE Tyrosine-protein kinase Lyn OS=Mus musculus GN=Lyn PE=1 SV=4	21.04	4.27	321.1	389666	8	7	3	15.43	512	12091
>sp|P25911-2|LYN_MOUSE Isoform 2 of Tyrosine-protein kinase Lyn OS=Mus musculus GN=Lyn
>sp|Q8VCM8|NCLN_MOUSE Nicalin OS=Mus musculus GN=Ncln PE=2 SV=2	20.72	4.14	367.9	401966	7	6	2	7.46	563	13729
>sp|Q921G7|ETFD_MOUSE Electron transfer flavoprotein-ubiquinone oxidoreductase, mitochondrial OS=Mus musculus GN=Etfdh PE=1 SV=1	20.18	4.36	376.4	768870	12	11	1	18.99	616	6821
>sp|Q9QXE0|HACL1_MOUSE 2-hydroxyacyl-CoA lyase 1 OS=Mus musculus GN=Hacl1 PE=1 SV=2	19.79	4.04	297.1	739261	9	7	1	10.67	581	9039
>sp|Q9QXC1|FETUB_MOUSE Fetuin-B OS=Mus musculus GN=Fetub PE=1 SV=1	19.15	4.08	311	416980	7	6	1	15.98	388	7506
>sp|B7ZMP1|XPP3_MOUSE Probable Xaa-Pro aminopeptidase 3 OS=Mus musculus GN=Xpnpep3 PE=2 SV=1	19.07	4.54	360.8	355233	7	7	1	11.86	506	23546
>sp|P60710|ACTB_MOUSE Actin, cytoplasmic 1 OS=Mus musculus GN=Actb PE=1 SV=1	18.55	4.18	355.2	493036	8	8	2	22.4	375	400
>sp|P63260|ACTG_MOUSE Actin, cytoplasmic 2 OS=Mus musculus GN=Actg1 PE=1 SV=1
>sp|P17717|UDB17_MOUSE UDP-glucuronosyltransferase 2B17 OS=Mus musculus GN=Ugt2b17 PE=2 SV=1	18.31	4.02	414	664557	9	8	1	11.32	530	22854
>sp|Q8BGT5|ALAT2_MOUSE Alanine aminotransferase 2 OS=Mus musculus GN=Gpt2 PE=2 SV=1	17.47	4.04	416.1	677366	16	11	5	16.28	522	772
>sp|Q61781|K1C14_MOUSE Keratin, type I cytoskeletal 14 OS=Mus musculus GN=Krt14 PE=1 SV=2	17.21	4.32	418.7	768427	11	10	2	14.46	484	10667
>sp|Q8BGH2|SAM50_MOUSE Sorting and assembly machinery component 50 homolog OS=Mus musculus GN=Samm50 PE=1 SV=1	16.82	4.04	286.3	1.49295e+06	16	14	2	23.45	469	18678
>sp|P56593|CP2AC_MOUSE Cytochrome P450 2A12 OS=Mus musculus GN=Cyp2a12 PE=1 SV=2	16.68	4.3	319.5	612788	9	8	2	15.45	492	4570
>sp|Q921X9|PDIA5_MOUSE Protein disulfide-isomerase A5 OS=Mus musculus GN=Pdia5 PE=2 SV=1	16.47	4.12	296.9	437864	8	7	0	12.96	517	15384
>sp|Q64458|CP2CT_MOUSE Cytochrome P450 2C29 OS=Mus musculus GN=Cyp2c29 PE=1 SV=2	15.39	4.24	341.4	415982	8	8	3	13.67	490	4575
>sp|Q9DBT9|M2GD_MOUSE Dimethylglycine dehydrogenase, mitochondrial OS=Mus musculus GN=Dmgdh PE=1 SV=1	15.22	4.32	341.5	410831	8	6	0	7.36	869	12140
>sp|Q9WU79|PROD_MOUSE Proline dehydrogenase 1, mitochondrial OS=Mus musculus GN=Prodh PE=2 SV=2	15.21	5.33	430.2	233090	6	5	0	8.68	599	16488
>sp|P61922|GABT_MOUSE 4-aminobutyrate aminotransferase, mitochondrial OS=Mus musculus GN=Abat PE=1 SV=1	14.85	4.94	366.9	377761	6	5	1	11.2	500	8029
>sp|P61922-2|GABT_MOUSE Isoform 2 of 4-aminobutyrate aminotransferase, mitochondrial OS=Mus musculus GN=Abat
>sp|P07724|ALBU_MOUSE Serum albumin OS=Mus musculus GN=Alb PE=1 SV=3	14.75	3.98	277.7	530282	8	7	0	11.84	608	773
>sp|P32020|NLTP_MOUSE Non-specific lipid-transfer protein OS=Mus musculus GN=Scp2 PE=1 SV=3	14.39	2.97	308.7	488485	11	10	3	19.38	547	14127
>sp|K1C9_HUMAN|(Common contaminant protein)	13.91	4.44	416.1	870108	12	11	3	17.82	623	24152
>sp|Q8QZY2|GLCTK_MOUSE Glycerate kinase OS=Mus musculus GN=Glyctk PE=2 SV=1	13.89	4.3	344.3	263141	4	4	0	8.8	523	8352
>sp|P34914|HYES_MOUSE Epoxide hydrolase 2 OS=Mus musculus GN=Ephx2 PE=1 SV=2	13.75	5.27	340.2	400480	9	8	3	11.37	554	9668
>sp|P34914-2|HYES_MOUSE Isoform 2 of Epoxide hydrolase 2 OS=Mus musculus GN=Ephx2
>sp|Q8BWT1|THIM_MOUSE 3-ketoacyl-CoA thiolase, mitochondrial OS=Mus musculus GN=Acaa2 PE=1 SV=3	13.47	3.29	284.9	539109	9	8	2	24.18	397	21320
>sp|Q99KI0|ACON_MOUSE Aconitate hydratase, mitochondrial OS=Mus musculus GN=Aco2 PE=1 SV=1	13.29	4.94	360.1	378330	6	6	0	7.69	780	350
>sp|Q3UZ09|C1RL_MOUSE Complement C1r subcomponent-like protein OS=Mus musculus GN=C1rl PE=1 SV=1	13.19	4.3	301.9	667136	9	7	1	14.73	482	2283
>sp|Q99MR8|MCCA_MOUSE Methylcrotonoyl-CoA carboxylase subunit alpha, mitochondrial OS=Mus musculus GN=Mccc1 PE=2 SV=2	12.54	5.33	310	150455	5	5	1	7.95	717	12445
>sp|Q91VA0|ACSM1_MOUSE Acyl-coenzyme A synthetase ACSM1, mitochondrial OS=Mus musculus GN=Acsm1 PE=1 SV=1	12.35	4.14	346.8	257660	5	5	1	6.98	573	386
>sp|Q91VA0-2|ACSM1_MOUSE Isoform 2 of Acyl-coenzyme A synthetase ACSM1, mitochondrial OS=Mus musculus GN=Acsm1
>sp|P08113|ENPL_MOUSE Endoplasmin OS=Mus musculus GN=Hsp90b1 PE=1 SV=2	11.97	5.37	337.7	430585	9	7	1	8.48	802	6598
>sp|Q9JMA7|CP341_MOUSE Cytochrome P450 3A41 OS=Mus musculus GN=Cyp3a41a PE=2 SV=2	11.81	4.17	331.2	500597	9	7	5	10.32	504	4589
>sp|Q571F8|GLSL_MOUSE Glutaminase liver isoform, mitochondrial OS=Mus musculus GN=Gls2 PE=2 SV=2	11.62	3.81	269.1	267680	7	6	2	8.97	602	8403
>sp|Q71RI9|KAT3_MOUSE Kynurenine--oxoglutarate transaminase 3 OS=Mus musculus GN=Ccbl2 PE=1 SV=1	11.47	4.02	245.2	121420	7	4	1	10.33	455	10761
>sp|Q71RI9-2|KAT3_MOUSE Isoform 2 of Kynurenine--oxoglutarate transaminase 3 OS=Mus musculus GN=Ccbl2
>sp|Q91X34|BAAT_MOUSE Bile acid-CoA:amino acid N-acyltransferase OS=Mus musculus GN=Baat PE=1 SV=1	11.43	4.21	271.6	430386	7	5	1	10.95	420	1823
>sp|TRYP_PIG|(Common contaminant protein)	11.25	4.22	465.9	3.47703e+06	14	4	1	16.45	231	24193
>sp|P25688|URIC_MOUSE Uricase OS=Mus musculus GN=Uox PE=1 SV=2	11.09	4.47	400.6	258345	6	6	0	17.82	303	22959
>sp|Q8BW75|AOFB_MOUSE Amine oxidase [flavin-containing] B OS=Mus musculus GN=Maob PE=1 SV=4	10.98	3.7	366.3	624408	8	6	1	11.15	520	1076
>sp|Q8BGA8|ACSM5_MOUSE Acyl-coenzyme A synthetase ACSM5, mitochondrial OS=Mus musculus GN=Acsm5 PE=2 SV=1	10.88	4.17	379.4	564341	12	8	1	12.63	578	394
>sp|Q63886|UD11_MOUSE UDP-glucuronosyltransferase 1-1 OS=Mus musculus GN=Ugt1a1 PE=2 SV=2	10.47	4.13	401.7	985933	7	7	2	7.66	535	22844
>sp|Q8R180|ERO1A_MOUSE ERO1-like protein alpha OS=Mus musculus GN=Ero1l PE=1 SV=2	10.37	4.15	266.1	667876	10	9	1	14.44	464	6752
>sp|Q9DBG1|CP27A_MOUSE Sterol 26-hydroxylase, mitochondrial OS=Mus musculus GN=Cyp27a1 PE=1 SV=1	10.09	4.31	392.3	130302	4	3	1	6.75	533	4566
>sp|Q91X77|CY250_MOUSE Cytochrome P450 2C50 OS=Mus musculus GN=Cyp2c50 PE=1 SV=2	10.03	4.28	351.2	421342	4	4	1	8.78	490	5194
>sp|Q8CC88|K0564_MOUSE Uncharacterized protein KIAA0564 homolog OS=Mus musculus GN=Kiaa0564 PE=2 SV=2	9.98	3.6	313.1	184218	7	5	0	2.83	1905	10530
>sp|Q8CC88-2|K0564_MOUSE Isoform 2 of Uncharacterized protein KIAA0564 homolog OS=Mus musculus GN=Kiaa0564
>sp|P56480|ATPB_MOUSE ATP synthase subunit beta, mitochondrial OS=Mus musculus GN=Atp5b PE=1 SV=2	9.93	4.28	311.8	134619	5	5	1	10.02	529	1672
>sp|Q3UNX5|ACSM3_MOUSE Acyl-coenzyme A synthetase ACSM3, mitochondrial OS=Mus musculus GN=Acsm3 PE=1 SV=2	9.86	4.32	342.2	159468	5	5	0	9.48	580	391
>sp|Q3UNX5-2|ACSM3_MOUSE Isoform 2 of Acyl-coenzyme A synthetase ACSM3, mitochondrial OS=Mus musculus GN=Acsm3
>sp|Q9R0H0|ACOX1_MOUSE Peroxisomal acyl-coenzyme A oxidase 1 OS=Mus musculus GN=Acox1 PE=1 SV=5	9.83	4.09	269.4	282385	9	7	3	10.44	661	361
>sp|Q60597|ODO1_MOUSE 2-oxoglutarate dehydrogenase, mitochondrial OS=Mus musculus GN=Ogdh PE=1 SV=3	9.74	3.72	302.3	444330	7	7	1	6.94	1023	14670
>sp|Q60597-2|ODO1_MOUSE Isoform 2 of 2-oxoglutarate dehydrogenase, mitochondrial OS=Mus musculus GN=Ogdh
>sp|Q60597-3|ODO1_MOUSE Isoform 3 of 2-oxoglutarate dehydrogenase, mitochondrial OS=Mus musculus GN=Ogdh
>sp|Q60597-4|ODO1_MOUSE Isoform 4 of 2-oxoglutarate dehydrogenase, mitochondrial OS=Mus musculus GN=Ogdh
>sp|P97501|FMO3_MOUSE Dimethylaniline monooxygenase [N-oxide-forming] 3 OS=Mus musculus GN=Fmo3 PE=1 SV=1	9.46	3.39	290	242123	7	5	0	10.11	534	7691
>sp|Q8JZN5|ACAD9_MOUSE Acyl-CoA dehydrogenase family member 9, mitochondrial OS=Mus musculus GN=Acad9 PE=2 SV=2	9.06	4.22	299.8	282811	6	5	1	6.4	625	257
>sp|P56657|CP240_MOUSE Cytochrome P450 2C40 OS=Mus musculus GN=Cyp2c40 PE=2 SV=2	8.81	3.44	269.3	213785	4	4	1	7.94	491	4559
>sp|Q64176|EST22_MOUSE Liver carboxylesterase 22 OS=Mus musculus GN=Es22 PE=1 SV=1	8.77	3.69	421.1	183406	4	4	0	8.01	562	6802
>sp|P97807|FUMH_MOUSE Fumarate hydratase, mitochondrial OS=Mus musculus GN=Fh PE=1 SV=3	8.7	4.24	339.8	213688	5	4	0	8.48	507	7908
>sp|P97807-2|FUMH_MOUSE Isoform Cytoplasmic of Fumarate hydratase, mitochondrial OS=Mus musculus GN=Fh
>sp|Q99LC5|ETFA_MOUSE Electron transfer flavoprotein subunit alpha, mitochondrial OS=Mus musculus GN=Etfa PE=1 SV=2	8.39	2.37	173.1	142418	5	5	0	21.62	333	6819
>sp|Q9DB77|QCR2_MOUSE Cytochrome b-c1 complex subunit 2, mitochondrial OS=Mus musculus GN=Uqcrc2 PE=1 SV=1	8.36	5.28	290.7	126474	3	3	0	8.17	453	16899
>sp|Q9JMH6|TRXR1_MOUSE Thioredoxin reductase 1, cytoplasmic OS=Mus musculus GN=Txnrd1 PE=1 SV=3	8.33	4.21	293.2	228808	5	3	1	5.22	613	22298
>sp|Q9JMH6-2|TRXR1_MOUSE Isoform 2 of Thioredoxin reductase 1, cytoplasmic OS=Mus musculus GN=Txnrd1
>sp|Q9D379|HYEP_MOUSE Epoxide hydrolase 1 OS=Mus musculus GN=Ephx1 PE=1 SV=2	8.32	3.69	359.8	269881	5	4	1	5.93	455	9667
>sp|Q9Z2I8|SUCB2_MOUSE Succinyl-CoA ligase [GDP-forming] subunit beta, mitochondrial OS=Mus musculus GN=Suclg2 PE=2 SV=3	8.27	3.42	301.8	219509	5	4	0	9.47	433	20453
>sp|Q9Z2I8-2|SUCB2_MOUSE Isoform 2 of Succinyl-CoA ligase [GDP-forming] subunit beta, mitochondrial OS=Mus musculus GN=Suclg2
>sp|Q8QZT1|THIL_MOUSE Acetyl-CoA acetyltransferase, mitochondrial OS=Mus musculus GN=Acat1 PE=1 SV=1	8.2	4.23	353.5	190191	5	5	0	14.86	424	21319
>sp|Q99L13|3HIDH_MOUSE 3-hydroxyisobutyrate dehydrogenase, mitochondrial OS=Mus musculus GN=Hibadh PE=2 SV=1	8.18	3.82	254.3	83613	4	3	0	13.43	335	42
>sp|Q9JLT4|TRXR2_MOUSE Thioredoxin reductase 2, mitochondrial OS=Mus musculus GN=Txnrd2 PE=1 SV=4	8.15	3.74	358.3	356862	5	4	1	5.73	524	22300
>sp|Q9JLT4-2|TRXR2_MOUSE Isoform 2 of Thioredoxin reductase 2, mitochondrial OS=Mus musculus GN=Txnrd2
>sp|Q9JLT4-3|TRXR2_MOUSE Isoform 3 of Thioredoxin reductase 2, mitochondrial OS=Mus musculus GN=Txnrd2
>sp|Q9JLT4-4|TRXR2_MOUSE Isoform 4 of Thioredoxin reductase 2, mitochondrial OS=Mus musculus GN=Txnrd2
>sp|P45952|ACADM_MOUSE Medium-chain specific acyl-CoA dehydrogenase, mitochondrial OS=Mus musculus GN=Acadm PE=1 SV=1	8.14	3.87	245.8	298081	6	6	1	15.2	421	259
>sp|P08249|MDHM_MOUSE Malate dehydrogenase, mitochondrial OS=Mus musculus GN=Mdh2 PE=1 SV=3	8.07	3.57	248.7	322556	5	5	2	17.46	338	12516
>sp|P97742|CPT1A_MOUSE Carnitine O-palmitoyltransferase 1, liver isoform OS=Mus musculus GN=Cpt1a PE=2 SV=4	8.07	3.73	315.8	416344	5	5	0	6.86	773	4653
>sp|Q8C165|P20D1_MOUSE Probable carboxypeptidase PM20D1 OS=Mus musculus GN=Pm20d1 PE=2 SV=1	8.06	3.76	347.7	260728	5	4	1	7.75	503	14936
>sp|Q9DBF1-2|AL7A1_MOUSE Isoform 2 of Alpha-aminoadipic semialdehyde dehydrogenase OS=Mus musculus GN=Aldh7a1	8.03	4.66	333.9	76973.2	2	2	1	3.33	511	768
>sp|P15392|CP2A4_MOUSE Cytochrome P450 2A4 OS=Mus musculus GN=Cyp2a4 PE=2 SV=2	8.02	3.17	313.8	148208	4	3	0	6.07	494	4568
>sp|P47740|AL3A2_MOUSE Fatty aldehyde dehydrogenase OS=Mus musculus GN=Aldh3a2 PE=2 SV=2	7.86	3.27	243.2	255171	7	5	0	11.36	484	763
>sp|Q8BFR5|EFTU_MOUSE Elongation factor Tu, mitochondrial OS=Mus musculus GN=Tufm PE=1 SV=1	7.86	4.24	339.5	199843	3	3	0	7.74	452	6401
>sp|Q8BFR5-2|EFTU_MOUSE Isoform 2 of Elongation factor Tu, mitochondrial OS=Mus musculus GN=Tufm
>sp|Q9DBE0|CSAD_MOUSE Cysteine sulfinic acid decarboxylase OS=Mus musculus GN=Csad PE=2 SV=1	7.73	4.24	289.5	247864	5	5	0	10.34	493	4871
>sp|Q9JHI5|IVD_MOUSE Isovaleryl-CoA dehydrogenase, mitochondrial OS=Mus musculus GN=Ivd PE=1 SV=1	7.68	3.8	228.2	185980	4	3	0	6.37	424	10421
>sp|Q62167|DDX3X_MOUSE ATP-dependent RNA helicase DDX3X OS=Mus musculus GN=Ddx3x PE=1 SV=3	7.66	2.48	227.4	232980	5	4	1	6.8	662	5446
>sp|P51660|DHB4_MOUSE Peroxisomal multifunctional enzyme type 2 OS=Mus musculus GN=Hsd17b4 PE=1 SV=3	7.55	4.26	299.6	207462	4	3	0	5.44	735	5618
>sp|Q99LJ1|FUCO_MOUSE Tissue alpha-L-fucosidase OS=Mus musculus GN=Fuca1 PE=2 SV=1	7.52	3.31	265.4	333537	4	3	0	5.75	452	7906
>sp|Q8VEH8|ERLEC_MOUSE Endoplasmic reticulum lectin 1 OS=Mus musculus GN=Erlec1 PE=2 SV=1	7.47	3.31	311.6	78125.2	3	3	0	6.83	483	6740
>sp|P47791|GSHR_MOUSE Glutathione reductase, mitochondrial OS=Mus musculus GN=Gsr PE=2 SV=3	7.43	4.08	318.2	187730	5	3	0	7.2	500	8846
>sp|Q61425|HCDH_MOUSE Hydroxyacyl-coenzyme A dehydrogenase, mitochondrial OS=Mus musculus GN=Hadh PE=1 SV=2	7.23	3.39	302.2	353197	4	4	0	10.51	314	9109
>sp|Q9CZU6|CISY_MOUSE Citrate synthase, mitochondrial OS=Mus musculus GN=Cs PE=1 SV=1	7.22	3.91	256.4	48306.5	2	2	0	4.31	464	3812
>sp|Q9D0K2|SCOT1_MOUSE Succinyl-CoA:3-ketoacid-coenzyme A transferase 1, mitochondrial OS=Mus musculus GN=Oxct1 PE=1 SV=1	7.18	3.37	243.1	178258	4	4	0	8.85	520	18860
>sp|Q9CZ13|QCR1_MOUSE Cytochrome b-c1 complex subunit 1, mitochondrial OS=Mus musculus GN=Uqcrc1 PE=1 SV=2	7.15	3.38	286.2	141957	4	4	0	8.75	480	16898
>sp|O88451|RDH7_MOUSE Retinol dehydrogenase 7 OS=Mus musculus GN=Rdh7 PE=2 SV=1	7.06	3.75	242	124848	3	3	0	10.13	316	17297
>sp|Q8K0E8|FIBB_MOUSE Fibrinogen beta chain OS=Mus musculus GN=Fgb PE=2 SV=1	6.94	2.93	253.5	503194	8	7	0	14.35	481	7600
>sp|Q8BH86|CN159_MOUSE UPF0317 protein C14orf159 homolog, mitochondrial OS=Mus musculus PE=2 SV=1	6.92	4	228.9	285474	6	5	1	7.29	617	4178
>sp|Q8BH86-2|CN159_MOUSE Isoform 2 of UPF0317 protein C14orf159 homolog, mitochondrial OS=Mus musculus
>sp|Q91W64|CP270_MOUSE Cytochrome P450 2C70 OS=Mus musculus GN=Cyp2c70 PE=2 SV=2	6.9	4.37	345.9	131267	3	3	0	7.16	489	4565
>sp|Q9DC50|OCTC_MOUSE Peroxisomal carnitine O-octanoyltransferase OS=Mus musculus GN=Crot PE=1 SV=1	6.89	3.79	280.6	355315	5	4	1	4.58	612	14646
>sp|P07356|ANXA2_MOUSE Annexin A2 OS=Mus musculus GN=Anxa2 PE=1 SV=2	6.71	4.14	419.8	161539	4	4	0	12.39	339	1063
>sp|Q02257|PLAK_MOUSE Junction plakoglobin OS=Mus musculus GN=Jup PE=1 SV=3	6.68	3.29	313.8	381302	5	4	0	5.1	745	15915
>sp|Q8BGV0|SYNM_MOUSE Probable asparagine--tRNA ligase, mitochondrial OS=Mus musculus GN=Nars2 PE=2 SV=1	6.62	4.12	289.9	163093	3	2	0	3.98	477	20611
>sp|P16332|MUTA_MOUSE Methylmalonyl-CoA mutase, mitochondrial OS=Mus musculus GN=Mut PE=2 SV=2	6.61	3.71	279.9	198206	4	3	0	3.74	748	13389
>sp|E9Q557|DESP_MOUSE Desmoplakin OS=Mus musculus GN=Dsp PE=3 SV=1	6.52	3.67	292.9	573784	11	10	1	2.67	2883	5540
>sp|P20108|PRDX3_MOUSE Thioredoxin-dependent peroxide reductase, mitochondrial OS=Mus musculus GN=Prdx3 PE=1 SV=1	6.47	3.66	318.2	302716	5	5	0	18.68	257	16430
>sp|P52196|THTR_MOUSE Thiosulfate sulfurtransferase OS=Mus musculus GN=Tst PE=1 SV=3	6.36	2.49	245.9	435039	6	6	0	15.82	297	21351
>sp|Q61247|A2AP_MOUSE Alpha-2-antiplasmin OS=Mus musculus GN=Serpinf2 PE=1 SV=1	6.32	3.75	360.7	331876	7	7	1	12.42	491	107
>sp|P05202|AATM_MOUSE Aspartate aminotransferase, mitochondrial OS=Mus musculus GN=Got2 PE=1 SV=1	6.23	2.11	255.3	523599	8	6	0	12.56	430	150
>sp|Q8BMS1|ECHA_MOUSE Trifunctional enzyme subunit alpha, mitochondrial OS=Mus musculus GN=Hadha PE=1 SV=1	6.12	3.47	285.6	137272	3	3	0	4.85	763	6294
>sp|P38060|HMGCL_MOUSE Hydroxymethylglutaryl-CoA lyase, mitochondrial OS=Mus musculus GN=Hmgcl PE=1 SV=2	6	4.41	248.4	80807.6	2	2	0	6.77	325	9332
>sp|Q922Q1|MOSC2_MOUSE MOSC domain-containing protein 2, mitochondrial OS=Mus musculus GN=Marc2 PE=1 SV=1	5.81	2.52	273.9	446055	6	5	0	10.95	338	13043
>sp|Q9Z2I9|SUCB1_MOUSE Succinyl-CoA ligase [ADP-forming] subunit beta, mitochondrial OS=Mus musculus GN=Sucla2 PE=1 SV=2	5.62	1.78	174.1	186524	5	4	0	8.42	463	20452
>sp|P58710|GGLO_MOUSE L-gulonolactone oxidase OS=Mus musculus GN=Gulo PE=1 SV=3	5.61	3.6	278.2	270345	6	4	1	5.68	440	8278
>sp|O35423|SPYA_MOUSE Serine--pyruvate aminotransferase, mitochondrial OS=Mus musculus GN=Agxt PE=1 SV=2	5.49	4.32	305.9	56621.1	2	2	0	5.57	413	20097
>sp|O35423-2|SPYA_MOUSE Isoform Peroxisomal of Serine--pyruvate aminotransferase, mitochondrial OS=Mus musculus GN=Agxt
>sp|Q8VCC2|EST1_MOUSE Liver carboxylesterase 1 OS=Mus musculus GN=Ces1 PE=2 SV=1	5.49	4.21	442.3	79546.2	2	2	0	4.07	565	6801
>sp|Q60759|GCDH_MOUSE Glutaryl-CoA dehydrogenase, mitochondrial OS=Mus musculus GN=Gcdh PE=2 SV=2	5.44	4.24	359.5	87337.2	3	3	0	8.22	438	8163
>sp|Q8JZZ0|UD3A2_MOUSE UDP-glucuronosyltransferase 3A2 OS=Mus musculus GN=Ugt3a2 PE=2 SV=2	5.42	3.38	399.5	174607	2	2	0	3.44	523	22853
>sp|P14211|CALR_MOUSE Calreticulin OS=Mus musculus GN=Calr PE=1 SV=1	5.33	1.66	275.4	258333	4	4	0	9.86	416	2532
>sp|P12790|CP2B9_MOUSE Cytochrome P450 2B9 OS=Mus musculus GN=Cyp2b9 PE=2 SV=1	5.28	2.53	234.2	201830	4	3	0	5.5	491	4571
>sp|P07901|HS90A_MOUSE Heat shock protein HSP 90-alpha OS=Mus musculus GN=Hsp90aa1 PE=1 SV=4	5.2	5.24	296.1	32455.5	1	1	0	1.91	733	9475
>sp|P11499|HS90B_MOUSE Heat shock protein HSP 90-beta OS=Mus musculus GN=Hsp90ab1 PE=1 SV=3
>sp|P51174|ACADL_MOUSE Long-chain specific acyl-CoA dehydrogenase, mitochondrial OS=Mus musculus GN=Acadl PE=2 SV=2	5.09	1.78	184.5	345374	7	6	3	13.02	430	258
>sp|Q99JY0|ECHB_MOUSE Trifunctional enzyme subunit beta, mitochondrial OS=Mus musculus GN=Hadhb PE=1 SV=1	4.92	4.95	365.8	24423.4	1	1	0	2.74	475	6295
>sp|Q60932|VDAC1_MOUSE Voltage-dependent anion-selective channel protein 1 OS=Mus musculus GN=Vdac1 PE=1 SV=3	4.9	3.5	249.1	112303	4	3	0	11.15	296	23091
>sp|Q60932-2|VDAC1_MOUSE Isoform Mt-VDAC1 of Voltage-dependent anion-selective channel protein 1 OS=Mus musculus GN=Vdac1
>sp|Q7TMR0|PCP_MOUSE Lysosomal Pro-X carboxypeptidase OS=Mus musculus GN=Prcp PE=2 SV=2	4.89	3.67	263.6	273395	4	3	0	4.07	491	15287
>sp|Q9DC61|MPPA_MOUSE Mitochondrial-processing peptidase subunit alpha OS=Mus musculus GN=Pmpca PE=1 SV=1	4.75	4.02	285.6	142810	3	3	0	5.53	524	13110
>sp|P16330|CN37_MOUSE 2',3'-cyclic-nucleotide 3'-phosphodiesterase OS=Mus musculus GN=Cnp PE=1 SV=3	4.75	4.77	367.1	257782	1	1	1	5	420	4184
>sp|P16330-2|CN37_MOUSE Isoform CNPI of 2',3'-cyclic-nucleotide 3'-phosphodiesterase OS=Mus musculus GN=Cnp
>sp|P70158|ASM3A_MOUSE Acid sphingomyelinase-like phosphodiesterase 3a OS=Mus musculus GN=Smpdl3a PE=2 SV=2	4.74	2.33	280	259328	3	3	1	5.17	445	1495
>sp|P80314|TCPB_MOUSE T-complex protein 1 subunit beta OS=Mus musculus GN=Cct2 PE=1 SV=4	4.65	4.26	348	176574	3	2	0	4.3	535	21040
>sp|Q64464|CP3AD_MOUSE Cytochrome P450 3A13 OS=Mus musculus GN=Cyp3a13 PE=2 SV=1	4.64	3.63	313.3	216681	3	2	0	4.37	503	4592
>sp|Q922U2|K2C5_MOUSE Keratin, type II cytoskeletal 5 OS=Mus musculus GN=Krt5 PE=1 SV=1	4.56	1.8	244.9	278787	5	4	2	4.66	580	10703
>sp|Q9DCX2|ATP5H_MOUSE ATP synthase subunit d, mitochondrial OS=Mus musculus GN=Atp5h PE=1 SV=3	4.54	4.29	377.8	147112	2	2	0	11.18	161	1659
>sp|Q8JZR0|ACSL5_MOUSE Long-chain-fatty-acid--CoA ligase 5 OS=Mus musculus GN=Acsl5 PE=2 SV=1	4.48	4.15	311	119012	3	2	0	3.22	683	383
>sp|Q8R086|SUOX_MOUSE Sulfite oxidase, mitochondrial OS=Mus musculus GN=Suox PE=1 SV=2	4.44	2.99	273	136999	2	2	0	3.3	546	20483
>sp|P58281|OPA1_MOUSE Dynamin-like 120 kDa protein, mitochondrial OS=Mus musculus GN=Opa1 PE=1 SV=1	4.43	4.13	323.8	61544.7	2	2	0	2.19	960	14792
>sp|P58281-2|OPA1_MOUSE Isoform 2 of Dynamin-like 120 kDa protein, mitochondrial OS=Mus musculus GN=Opa1
>sp|P53395|ODB2_MOUSE Lipoamide acyltransferase component of branched-chain alpha-keto acid dehydrogenase complex, mitochondrial OS=Mus musculus GN=Dbt PE=2 SV=2	4.39	3.64	382.3	340469	5	5	1	9.13	482	14650
>sp|P17563|SBP1_MOUSE Selenium-binding protein 1 OS=Mus musculus GN=Selenbp1 PE=1 SV=2	4.33	3.64	303.4	146993	3	3	0	6.14	472	18732
>sp|Q9WTP6|KAD2_MOUSE Adenylate kinase 2, mitochondrial OS=Mus musculus GN=Ak2 PE=1 SV=5	4.32	4.17	275.4	184305	3	2	1	9.2	239	10724
>sp|Q9WTP6-2|KAD2_MOUSE Isoform 2 of Adenylate kinase 2, mitochondrial OS=Mus musculus GN=Ak2
>sp|Q9CQ62|DECR_MOUSE 2,4-dienoyl-CoA reductase, mitochondrial OS=Mus musculus GN=Decr1 PE=1 SV=1	4.25	3.32	270.6	74438.8	2	2	0	6.87	335	5473
>sp|Q9CQH3|NDUB5_MOUSE NADH dehydrogenase [ubiquinone] 1 beta subcomplex subunit 5, mitochondrial OS=Mus musculus GN=Ndufb5 PE=1 SV=1	4.24	4.26	274.5	19238.7	1	1	0	5.82	189	13812
>sp|Q9Z2K1|K1C16_MOUSE Keratin, type I cytoskeletal 16 OS=Mus musculus GN=Krt16 PE=1 SV=3	4.23	4.25	282	82227.5	2	2	0	4.26	469	10669
>sp|Q9DD20|MET7B_MOUSE Methyltransferase-like protein 7B OS=Mus musculus GN=Mettl7b PE=2 SV=2	4.22	4.2	267.6	67460.6	2	2	0	7.38	244	12651
>sp|P19221|THRB_MOUSE Prothrombin OS=Mus musculus GN=F2 PE=1 SV=1	4.22	4.26	318.1	32029.3	1	1	0	1.62	618	21342
>sp|Q8BJ64|CHDH_MOUSE Choline dehydrogenase, mitochondrial OS=Mus musculus GN=Chdh PE=1 SV=1	4.21	2.48	224	162910	3	2	0	3.69	596	3672
>sp|Q9DCW4|ETFB_MOUSE Electron transfer flavoprotein subunit beta OS=Mus musculus GN=Etfb PE=1 SV=3	4.19	3.83	232.5	57648.8	2	2	0	7.84	255	6820
>sp|P09103|PDIA1_MOUSE Protein disulfide-isomerase OS=Mus musculus GN=P4hb PE=1 SV=2	4.19	1.83	184.1	260040	4	4	0	9.23	509	15379
>sp|Q8VED5|K2C79_MOUSE Keratin, type II cytoskeletal 79 OS=Mus musculus GN=Krt79 PE=1 SV=2	4.18	4.16	357.9	112755	3	2	0	2.26	531	10711
>sp|Q8BWQ1|UD2A3_MOUSE UDP-glucuronosyltransferase 2A3 OS=Mus musculus GN=Ugt2a3 PE=2 SV=1	4.17	2.47	287.1	289076	4	4	0	6.74	534	22851
>sp|Q91WN4|KMO_MOUSE Kynurenine 3-monooxygenase OS=Mus musculus GN=Kmo PE=1 SV=1	4.16	4.19	403.7	143971	1	1	0	2.3	479	11214
>sp|Q91WN4-2|KMO_MOUSE Isoform 2 of Kynurenine 3-monooxygenase OS=Mus musculus GN=Kmo
>sp|Q8C5H8|NAKD1_MOUSE NAD kinase domain-containing protein 1 OS=Mus musculus GN=Nadkd1 PE=1 SV=2	4.16	4.15	302.1	59090	2	2	0	4.42	452	13605
>sp|Q8C5H8-2|NAKD1_MOUSE Isoform 2 of NAD kinase domain-containing protein 1 OS=Mus musculus GN=Nadkd1
>sp|Q8C5H8-3|NAKD1_MOUSE Isoform 3 of NAD kinase domain-containing protein 1 OS=Mus musculus GN=Nadkd1
>sp|Q8C5H8-4|NAKD1_MOUSE Isoform 4 of NAD kinase domain-containing protein 1 OS=Mus musculus GN=Nadkd1
>sp|Q61171|PRDX2_MOUSE Peroxiredoxin-2 OS=Mus musculus GN=Prdx2 PE=1 SV=3	4.14	4.15	283.3	30208.1	1	1	0	5.56	198	16429
>sp|Q7TNG8|LDHD_MOUSE Probable D-lactate dehydrogenase, mitochondrial OS=Mus musculus GN=Ldhd PE=1 SV=1	4.07	1.69	258.6	291962	4	4	1	11.98	484	11555
>sp|K1C15_SHEEP|(Common contaminant protein)	3.96	3.09	261.6	156497	2	2	0	4.42	453	24151
>sp|Q61730|IL1AP_MOUSE Interleukin-1 receptor accessory protein OS=Mus musculus GN=Il1rap PE=1 SV=1	3.82	3.85	220.2	69458.2	2	2	1	3.68	570	9989
>sp|Q61730-2|IL1AP_MOUSE Isoform 2 of Interleukin-1 receptor accessory protein OS=Mus musculus GN=Il1rap
>sp|P50136|ODBA_MOUSE 2-oxoisovalerate dehydrogenase subunit alpha, mitochondrial OS=Mus musculus GN=Bckdha PE=1 SV=1	3.8	3.68	276.8	80197.5	2	2	0	4.3	442	14651
>sp|Q9CQX2|CYB5B_MOUSE Cytochrome b5 type B OS=Mus musculus GN=Cyb5b PE=1 SV=1	3.74	3.73	246	151033	3	2	0	10.96	146	5200
>sp|P20852|CP2A5_MOUSE Cytochrome P450 2A5 OS=Mus musculus GN=Cyp2a5 PE=2 SV=1	3.74	3.77	242.3	16927.2	1	1	0	2.23	494	4569
>sp|P16858|G3P_MOUSE Glyceraldehyde-3-phosphate dehydrogenase OS=Mus musculus GN=Gapdh PE=1 SV=2	3.7	2.44	250.4	538402	4	3	1	7.21	333	7994
>sp|Q922B2|SYDC_MOUSE Aspartate--tRNA ligase, cytoplasmic OS=Mus musculus GN=Dars PE=2 SV=2	3.68	3.66	260.1	196869	3	2	0	3.79	501	20552
>sp|P55096|ABCD3_MOUSE ATP-binding cassette sub-family D member 3 OS=Mus musculus GN=Abcd3 PE=1 SV=2	3.65	3.41	125.4	40049.4	2	2	1	4.4	659	179
>sp|Q6P9S7|GLT10_MOUSE Polypeptide N-acetylgalactosaminyltransferase 10 OS=Mus musculus GN=Galnt10 PE=2 SV=1	3.58	3.62	308.8	73343	1	1	0	1.49	603	8404
>sp|P54071|IDHP_MOUSE Isocitrate dehydrogenase [NADP], mitochondrial OS=Mus musculus GN=Idh2 PE=1 SV=3	3.45	3.21	291	249085	4	4	1	6.42	452	9778
>sp|P10605|CATB_MOUSE Cathepsin B OS=Mus musculus GN=Ctsb PE=1 SV=2	3.39	3.37	295.5	155827	3	3	0	7.08	339	2639
>sp|Q61147|CERU_MOUSE Ceruloplasmin OS=Mus musculus GN=Cp PE=1 SV=2	3.36	3.43	153.6	10408	1	1	0	1.41	1061	3520
>sp|Q8BH95|ECHM_MOUSE Enoyl-CoA hydratase, mitochondrial OS=Mus musculus GN=Echs1 PE=1 SV=1	3.31	3.33	243	89231.1	1	1	0	3.1	290	6302
>sp|P00405|COX2_MOUSE Cytochrome c oxidase subunit 2 OS=Mus musculus GN=Mtco2 PE=1 SV=1	3.31	1.85	276.7	187276	2	2	1	7.49	227	4494
>sp|O35488|S27A2_MOUSE Very long-chain acyl-CoA synthetase OS=Mus musculus GN=Slc27a2 PE=1 SV=2	3.3	3.34	215.9	22538	1	1	0	2.26	620	18495
>sp|P58252|EF2_MOUSE Elongation factor 2 OS=Mus musculus GN=Eef2 PE=1 SV=2	3.2	1.64	228.7	223216	4	4	0	4.66	858	6357
>sp|Q3UEG6|AGT2_MOUSE Alanine--glyoxylate aminotransferase 2, mitochondrial OS=Mus musculus GN=Agxt2 PE=2 SV=1	3.18	1.69	158.3	110821	3	3	0	6.43	513	650
>sp|Q06185|ATP5I_MOUSE ATP synthase subunit e, mitochondrial OS=Mus musculus GN=Atp5i PE=1 SV=2	3.15	3.15	274.5	37493.5	1	1	0	16.9	71	1660
>sp|Q8BYK5|PHAR3_MOUSE Phosphatase and actin regulator 3 OS=Mus musculus GN=Phactr3 PE=1 SV=2	3.12	2.8	264.9	236774	2	2	1	17.38	558	15588
>sp|Q8BYK5-2|PHAR3_MOUSE Isoform 2 of Phosphatase and actin regulator 3 OS=Mus musculus GN=Phactr3
>sp|Q8BYK5-3|PHAR3_MOUSE Isoform 3 of Phosphatase and actin regulator 3 OS=Mus musculus GN=Phactr3
>sp|Q8BYK5-4|PHAR3_MOUSE Isoform 4 of Phosphatase and actin regulator 3 OS=Mus musculus GN=Phactr3
>sp|Q9DCU9|HOGA1_MOUSE Probable 4-hydroxy-2-oxoglutarate aldolase, mitochondrial OS=Mus musculus GN=Hoga1 PE=1 SV=1	3.07	3.09	235.5	51077.6	1	1	0	3.12	321	9394
>sp|Q07417|ACADS_MOUSE Short-chain specific acyl-CoA dehydrogenase, mitochondrial OS=Mus musculus GN=Acads PE=2 SV=2	3.04	2.43	199.9	93506.9	4	4	0	11.89	412	260
>sp|P35486|ODPA_MOUSE Pyruvate dehydrogenase E1 component subunit alpha, somatic form, mitochondrial OS=Mus musculus GN=Pdha1 PE=1 SV=1	3.04	2.38	278.5	163941	3	3	1	6.41	390	14678
>sp|Q14AX6|CDK12_MOUSE Cyclin-dependent kinase 12 OS=Mus musculus GN=Cdk12 PE=1 SV=2	3.02	2.72	316.8	251085	3	2	1	1.35	1484	3275
>sp|Q14AX6-3|CDK12_MOUSE Isoform 3 of Cyclin-dependent kinase 12 OS=Mus musculus GN=Cdk12
>Reverse >sp|Q9WVG9|MS3L1_MOUSE Male-specific lethal 3 homolog OS=Mus musculus GN=Msl3 PE=2 SV=3	3.01	3.01	242.2	206407	2	2	0	2.48	525	37416
>sp|Q8CGK3|LONM_MOUSE Lon protease homolog, mitochondrial OS=Mus musculus GN=Lonp1 PE=1 SV=2	3	2.1	230.2	214546	2	2	0	1.79	949	11779
>sp|P50247|SAHH_MOUSE Adenosylhomocysteinase OS=Mus musculus GN=Ahcy PE=1 SV=3	2.98	3.01	225.4	29916.5	1	1	0	2.78	432	18666
>sp|P62204|CALM_MOUSE Calmodulin OS=Mus musculus GN=Calm1 PE=1 SV=2	2.97	2.08	275.5	581515	9	6	0	26.17	149	2529
>sp|P01867|IGG2B_MOUSE Ig gamma-2B chain C region OS=Mus musculus GN=Igh-3 PE=1 SV=3	2.89	2.91	252.8	72992.1	1	1	0	1.98	404	9911
>sp|P01867-2|IGG2B_MOUSE Isoform 2 of Ig gamma-2B chain C region OS=Mus musculus GN=Igh-3
>sp|Q6IFX2|K1C42_MOUSE Keratin, type I cytoskeletal 42 OS=Mus musculus GN=Krt42 PE=1 SV=1	2.82	1.83	268.6	210096	4	3	0	6.64	452	10682
>Reverse >sp|O54826|AF10_MOUSE Protein AF-10 OS=Mus musculus GN=Mllt10 PE=1 SV=2	2.8	2.86	316.2	228189	1	1	0	0.84	1068	24809
>sp|O54782|MA2B2_MOUSE Epididymis-specific alpha-mannosidase OS=Mus musculus GN=Man2b2 PE=2 SV=2	2.78	1.87	121.7	61776.8	3	2	0	2.36	1018	12187
>sp|P29758|OAT_MOUSE Ornithine aminotransferase, mitochondrial OS=Mus musculus GN=Oat PE=1 SV=1	2.78	1.63	75.1	38986.7	2	2	0	6.83	439	14624
>sp|P14602|HSPB1_MOUSE Heat shock protein beta-1 OS=Mus musculus GN=Hspb1 PE=1 SV=3	2.72	2.74	224.1	82914.5	1	1	1	4.31	209	9501
>sp|P14602-2|HSPB1_MOUSE Isoform B of Heat shock protein beta-1 OS=Mus musculus GN=Hspb1
>sp|P14602-3|HSPB1_MOUSE Isoform C of Heat shock protein beta-1 OS=Mus musculus GN=Hspb1
>Reverse >sp|P26039|TLN1_MOUSE Talin-1 OS=Mus musculus GN=Tln1 PE=1 SV=2	2.7	2.85	305.2	659063	2	2	1	0.87	2541	45685
>sp|P61294|RAB6B_MOUSE Ras-related protein Rab-6B OS=Mus musculus GN=Rab6b PE=1 SV=1	2.63	2.64	230.5	66742.6	2	2	1	11.06	208	16999
>sp|P51881|ADT2_MOUSE ADP/ATP translocase 2 OS=Mus musculus GN=Slc25a5 PE=1 SV=3	2.59	2.51	221	266276	4	3	0	8.72	298	570
>sp|Q8CDG3|VCIP1_MOUSE Deubiquitinating protein VCIP135 OS=Mus musculus GN=Vcpip1 PE=2 SV=1	2.57	2.61	234.7	126834	3	1	0	0.57	1220	23089
>sp|Q9D3R5|F187A_MOUSE Ig-like V-type domain-containing protein FAM187A OS=Mus musculus GN=Fam187a PE=2 SV=1	2.51	2.51	240.6	201471	2	1	0	1.44	417	7066
>sp|P48678|LMNA_MOUSE Prelamin-A/C OS=Mus musculus GN=Lmna PE=1 SV=2	2.49	2.51	257.4	205508	2	1	0	1.35	665	11750
>sp|Q4LDG0|S27A5_MOUSE Bile acyl-CoA synthetase OS=Mus musculus GN=Slc27a5 PE=2 SV=2	2.47	2.24	190.7	110218	2	2	0	2.9	689	18499
>sp|A2AJN7|S4A11_MOUSE Sodium bicarbonate transporter-like protein 11 OS=Mus musculus GN=Slc4a11 PE=2 SV=1	2.45	2.48	281.8	120410	2	1	0	0.93	862	18606
>sp|Q9EP75|CP4FE_MOUSE Leukotriene-B4 omega-hydroxylase 3 OS=Mus musculus GN=Cyp4f14 PE=2 SV=1	2.43	1.17	181.6	79286.5	4	4	1	7.82	524	4601
>sp|Q9DCT2|NDUS3_MOUSE NADH dehydrogenase [ubiquinone] iron-sulfur protein 3, mitochondrial OS=Mus musculus GN=Ndufs3 PE=1 SV=2	2.4	2.42	216.3	11694.1	1	1	0	4.94	263	13825
>sp|Q8BG07|PLD4_MOUSE Phospholipase D4 OS=Mus musculus GN=Pld4 PE=2 SV=1	2.4	1.25	189.7	50406.8	3	2	0	3.38	503	15967
>sp|Q8BG07-2|PLD4_MOUSE Isoform 2 of Phospholipase D4 OS=Mus musculus GN=Pld4
>sp|Q99J99|THTM_MOUSE 3-mercaptopyruvate sulfurtransferase OS=Mus musculus GN=Mpst PE=1 SV=3	2.36	2.38	266.5	44768	1	1	0	3.03	297	21349
>sp|P20029|GRP78_MOUSE 78 kDa glucose-regulated protein OS=Mus musculus GN=Hspa5 PE=1 SV=3	2.32	1.06	201.1	110565	3	3	0	5.65	655	8806
>sp|Q64727|VINC_MOUSE Vinculin OS=Mus musculus GN=Vcl PE=1 SV=4	2.3	2.37	203.3	47895.7	1	1	0	1.22	1066	23130
>Reverse >sp|O08648|M3K4_MOUSE Mitogen-activated protein kinase kinase kinase 4 OS=Mus musculus GN=Map3k4 PE=1 SV=2	2.3	2.15	335.9	608139	14	1	0	0.44	1597	36369
>Reverse >sp|O08648-2|M3K4_MOUSE Isoform B of Mitogen-activated protein kinase kinase kinase 4 OS=Mus musculus GN=Map3k4
>sp|P33267|CP2F2_MOUSE Cytochrome P450 2F2 OS=Mus musculus GN=Cyp2f2 PE=2 SV=1	2.29	1.18	211	164561	4	3	0	5.3	491	4581
>sp|P56654|CP237_MOUSE Cytochrome P450 2C37 OS=Mus musculus GN=Cyp2c37 PE=2 SV=2	2.26	2.28	159	53712.1	2	2	1	4.49	490	4556
>sp|Q60930|VDAC2_MOUSE Voltage-dependent anion-selective channel protein 2 OS=Mus musculus GN=Vdac2 PE=1 SV=2	2.25	1.6	125.6	71613.7	4	4	0	16.95	295	23093
>sp|O55137|ACOT1_MOUSE Acyl-coenzyme A thioesterase 1 OS=Mus musculus GN=Acot1 PE=1 SV=1	2.25	2.27	133.8	23361	1	1	0	2.63	419	351
>sp|Q9QYR9|ACOT2_MOUSE Acyl-coenzyme A thioesterase 2, mitochondrial OS=Mus musculus GN=Acot2 PE=1 SV=2
>sp|O55125|NIPS1_MOUSE Protein NipSnap homolog 1 OS=Mus musculus GN=Nipsnap1 PE=1 SV=1	2.16	2.18	250	47717.9	1	1	0	2.82	284	14065
>Reverse >sp|O35551|RABE1_MOUSE Rab GTPase-binding effector protein 1 OS=Mus musculus GN=Rabep1 PE=1 SV=2	2.15	2.2	281.5	127068	1	1	0	1.16	862	41226
>Reverse >sp|O35551-2|RABE1_MOUSE Isoform 2 of Rab GTPase-binding effector protein 1 OS=Mus musculus GN=Rabep1
>Reverse >sp|O35551-3|RABE1_MOUSE Isoform 3 of Rab GTPase-binding effector protein 1 OS=Mus musculus GN=Rabep1
>Reverse >sp|O35551-4|RABE1_MOUSE Isoform 4 of Rab GTPase-binding effector protein 1 OS=Mus musculus GN=Rabep1
>Reverse >sp|O35551-5|RABE1_MOUSE Isoform 5 of Rab GTPase-binding effector protein 1 OS=Mus musculus GN=Rabep1
>Reverse >sp|O35551-6|RABE1_MOUSE Isoform 6 of Rab GTPase-binding effector protein 1 OS=Mus musculus GN=Rabep1
>sp|P45700|MA1A1_MOUSE Mannosyl-oligosaccharide 1,2-alpha-mannosidase IA OS=Mus musculus GN=Man1a1 PE=1 SV=1	2.14	2.18	308.7	68296.4	1	1	0	1.68	655	12179
>sp|Q99JR1|SFXN1_MOUSE Sideroflexin-1 OS=Mus musculus GN=Sfxn1 PE=1 SV=3	2.13	2.15	128.9	12689.2	1	1	0	4.04	322	19117
>sp|Q8VDD5|MYH9_MOUSE Myosin-9 OS=Mus musculus GN=Myh9 PE=1 SV=4	2.11	2.23	216.6	92377.2	3	3	1	1.33	1960	13453
>sp|Q8R2M0|TEAN2_MOUSE Transcription elongation factor A N-terminal and central domain-containing protein 2 OS=Mus musculus GN=Tceanc2 PE=2 SV=2	2.06	2.07	291.2	41794.3	1	1	0	4.35	207	21092
>Reverse >sp|Q99MZ6|MYO7B_MOUSE Myosin-VIIb OS=Mus musculus GN=Myo7b PE=1 SV=3	2.05	2.14	228.7	96258.9	2	2	1	0.9	2113	37724
>sp|Q9CY62|RN181_MOUSE E3 ubiquitin-protein ligase RNF181 OS=Mus musculus GN=Rnf181 PE=2 SV=1	1.94	1.95	288.8	46937.3	1	1	0	4.85	165	17871
>sp|Q9CY62-2|RN181_MOUSE Isoform 2 of E3 ubiquitin-protein ligase RNF181 OS=Mus musculus GN=Rnf181
>sp|Q99PL5|RRBP1_MOUSE Ribosome-binding protein 1 OS=Mus musculus GN=Rrbp1 PE=2 SV=2	1.94	1.92	202	566047	5	5	0	3.24	1605	18123
>sp|Q8VCM7|FIBG_MOUSE Fibrinogen gamma chain OS=Mus musculus GN=Fgg PE=2 SV=1	1.92	1.92	179.6	58824.2	2	2	0	4.82	436	7601
>sp|Q9EP89|LACTB_MOUSE Serine beta-lactamase-like protein LACTB, mitochondrial OS=Mus musculus GN=Lactb PE=1 SV=1	1.87	1.84	195.4	146765	3	3	0	5.08	551	11426
>Reverse >sp|Q8C129|LCAP_MOUSE Leucyl-cystinyl aminopeptidase OS=Mus musculus GN=Lnpep PE=1 SV=1	1.87	1.93	199	132734	1	1	0	1.37	1025	35732
>sp|Q9CW42|MOSC1_MOUSE MOSC domain-containing protein 1, mitochondrial OS=Mus musculus GN=Marc1 PE=1 SV=2	1.85	1.87	197.7	31974.2	1	1	0	3.53	340	13042
>sp|Q99MD6|TRXR3_MOUSE Thioredoxin reductase 3 (Fragment) OS=Mus musculus GN=Txnrd3 PE=1 SV=2	1.85	1.63	269.5	295284	5	5	2	7.17	697	22304
>sp|Q8BH59|CMC1_MOUSE Calcium-binding mitochondrial carrier protein Aralar1 OS=Mus musculus GN=Slc25a12 PE=1 SV=1	1.85	1.63	139.6	97233.3	3	3	1	3.25	677	4134
>sp|Q80X80|C2C2L_MOUSE C2 domain-containing protein 2-like OS=Mus musculus GN=C2cd2l PE=1 SV=2	1.84	1.89	223.6	82089.3	1	1	0	1.42	706	2297
>sp|Q9CZW5|TOM70_MOUSE Mitochondrial import receptor subunit TOM70 OS=Mus musculus GN=Tomm70a PE=1 SV=2	1.84	1.62	222.2	83231.5	2	2	0	3.27	611	21945
>sp|P70194|CLC4F_MOUSE C-type lectin domain family 4 member F OS=Mus musculus GN=Clec4f PE=1 SV=1	1.84	0.95	285.3	79096.1	2	2	0	4.01	548	3985
>sp|Q2VIS4|FILA2_MOUSE Filaggrin-2 OS=Mus musculus GN=Flg2 PE=1 SV=2	1.84	1.72	307.3	162493	2	2	0	0.85	2362	7614
>sp|Q9Z2I0|LETM1_MOUSE LETM1 and EF-hand domain-containing protein 1, mitochondrial OS=Mus musculus GN=Letm1 PE=2 SV=1	1.82	1.86	183.1	27265.3	1	1	0	1.76	738	11594
>sp|Q9CQQ7|AT5F1_MOUSE ATP synthase subunit b, mitochondrial OS=Mus musculus GN=Atp5f1 PE=1 SV=1	1.77	1.78	253.7	135327	2	2	0	6.25	256	1570
>sp|Q61207|SAP_MOUSE Sulfated glycoprotein 1 OS=Mus musculus GN=Psap PE=1 SV=2	1.75	1.78	117	37329.2	2	2	0	4.13	557	18694
>sp|Q8K370|ACD10_MOUSE Acyl-CoA dehydrogenase family member 10 OS=Mus musculus GN=Acad10 PE=2 SV=1	1.74	1.81	194.4	40923.6	1	1	0	0.84	1069	284
>sp|P35700|PRDX1_MOUSE Peroxiredoxin-1 OS=Mus musculus GN=Prdx1 PE=1 SV=1	1.72	1.73	252.2	93153.2	1	1	0	4.02	199	16428
>Reverse >sp|O88286-3|WIZ_MOUSE Isoform 2 of Protein Wiz OS=Mus musculus GN=Wiz	1.7	1.76	235.1	143762	1	1	0	0.71	982	47656
>sp|Q9DBN5|LONP2_MOUSE Lon protease homolog 2, peroxisomal OS=Mus musculus GN=Lonp2 PE=2 SV=1	1.68	1.67	180	69117	3	2	1	2.58	852	11780
>sp|Q9JKY5|HIP1R_MOUSE Huntingtin-interacting protein 1-related protein OS=Mus musculus GN=Hip1r PE=1 SV=2	1.67	1.71	260.4	125433	3	2	1	1.69	1068	9273
>Reverse >sp|A2ARI4|LGR4_MOUSE Leucine-rich repeat-containing G-protein coupled receptor 4 OS=Mus musculus GN=Lgr4 PE=2 SV=1	1.67	1.73	265.7	58806.7	1	1	0	0.74	951	35827
>sp|P01869|IGH1M_MOUSE Ig gamma-1 chain C region, membrane-bound form OS=Mus musculus GN=Ighg1 PE=1 SV=2	1.66	1.69	281.1	42043.4	1	1	0	2.54	393	9913
>sp|P01868|IGHG1_MOUSE Ig gamma-1 chain C region secreted form OS=Mus musculus GN=Ighg1 PE=1 SV=1
>sp|Q9R233|TPSN_MOUSE Tapasin OS=Mus musculus GN=Tapbp PE=2 SV=2	1.66	1.69	234.3	101344	1	1	0	2.15	465	22042
>sp|Q9R233-2|TPSN_MOUSE Isoform Short of Tapasin OS=Mus musculus GN=Tapbp
>sp|O35728|CP4AE_MOUSE Cytochrome P450 4A14 OS=Mus musculus GN=Cyp4a14 PE=2 SV=1	1.64	1.64	216.8	69050.3	2	2	0	4.54	507	4597
>sp|P00186|CP1A2_MOUSE Cytochrome P450 1A2 OS=Mus musculus GN=Cyp1a2 PE=1 SV=1	1.64	1.66	161.1	72156.1	2	2	0	4.48	513	4552
>sp|P70274|SEPP1_MOUSE Selenoprotein P OS=Mus musculus GN=Sepp1 PE=2 SV=3	1.64	1.62	193.9	113212	2	2	0	3.95	380	19007
>sp|Q60766|IRGM1_MOUSE Immunity-related GTPase family M protein 1 OS=Mus musculus GN=Irgm1 PE=1 SV=1	1.63	1.57	147.8	195660	4	3	0	8.31	409	10274
>sp|Q60766-2|IRGM1_MOUSE Isoform 2 of Immunity-related GTPase family M protein 1 OS=Mus musculus GN=Irgm1
>sp|P26041|MOES_MOUSE Moesin OS=Mus musculus GN=Msn PE=1 SV=3	1.63	0.94	189.8	213534	4	4	1	5.89	577	13016
>Reverse >sp|Q80TZ9|RERE_MOUSE Arginine-glutamic acid dipeptide repeats protein OS=Mus musculus GN=Rere PE=1 SV=3	1.63	1.73	77	129859	1	1	1	0.9	1558	41576
>sp|Q8QZR5|ALAT1_MOUSE Alanine aminotransferase 1 OS=Mus musculus GN=Gpt PE=2 SV=3	1.63	1.64	176.7	29387.4	2	1	0	2.62	496	771
>sp|Q91WD5|NDUS2_MOUSE NADH dehydrogenase [ubiquinone] iron-sulfur protein 2, mitochondrial OS=Mus musculus GN=Ndufs2 PE=1 SV=1	1.63	1.66	174.3	69127.9	2	2	0	3.46	463	13824
>sp|Q3UV17|K22O_MOUSE Keratin, type II cytoskeletal 2 oral OS=Mus musculus GN=Krt76 PE=2 SV=1	1.62	1.6	214	651814	3	2	0	1.85	594	10699
>Reverse >sp|Q8BZ05|ARAP2_MOUSE Arf-GAP with Rho-GAP domain, ANK repeat and PH domain-containing protein 2 OS=Mus musculus GN=Arap2 PE=1 SV=2	1.62	1.72	106.8	119754	1	1	0	0.7	1703	25436
>Reverse >sp|P98083|SHC1_MOUSE SHC-transforming protein 1 OS=Mus musculus GN=Shc1 PE=1 SV=3	1.61	1.41	307.7	612159	14	2	1	2.59	579	43453
>Reverse >sp|P98083-2|SHC1_MOUSE Isoform p52Shc of SHC-transforming protein 1 OS=Mus musculus GN=Shc1
>sp|P00687|AMY1_MOUSE Alpha-amylase 1 OS=Mus musculus GN=Amy1 PE=1 SV=2	1.61	1.36	206.8	111148	2	2	1	3.33	511	875
>sp|P16301|LCAT_MOUSE Phosphatidylcholine-sterol acyltransferase OS=Mus musculus GN=Lcat PE=1 SV=2	1.6	1.61	201.6	61946.6	2	1	0	2.51	438	11515
>sp|P67778|PHB_MOUSE Prohibitin OS=Mus musculus GN=Phb PE=1 SV=1	1.59	1.61	124.9	18256	1	1	0	4.41	272	15597
>sp|Q9R1S8|CAN7_MOUSE Calpain-7 OS=Mus musculus GN=Capn7 PE=2 SV=1	1.59	1.64	47.6	11408.6	1	1	0	1.85	813	2559
>sp|Q9QWL7|K1C17_MOUSE Keratin, type I cytoskeletal 17 OS=Mus musculus GN=Krt17 PE=1 SV=3	1.58	1.61	160.3	15308.1	1	1	0	2.08	433	10670
>sp|P17156|HSP72_MOUSE Heat shock-related 70 kDa protein 2 OS=Mus musculus GN=Hspa2 PE=1 SV=2	1.58	1.62	108.5	14372.3	1	1	0	2.05	633	9496
>sp|P63017|HSP7C_MOUSE Heat shock cognate 71 kDa protein OS=Mus musculus GN=Hspa8 PE=1 SV=1
>sp|P33587|PROC_MOUSE Vitamin K-dependent protein C OS=Mus musculus GN=Proc PE=1 SV=2	1.58	1.61	113	16917.3	1	1	0	2.83	460	16486
>Reverse >sp|Q69ZM6|STK36_MOUSE Serine/threonine-protein kinase 36 OS=Mus musculus GN=Stk36 PE=1 SV=3	1.58	1.57	238.9	165175	6	1	0	0.61	1316	44580
>Reverse >sp|Q69ZM6-2|STK36_MOUSE Isoform 2 of Serine/threonine-protein kinase 36 OS=Mus musculus GN=Stk36
>Reverse >sp|Q69ZM6-3|STK36_MOUSE Isoform 3 of Serine/threonine-protein kinase 36 OS=Mus musculus GN=Stk36
>sp|Q9D0M3|CY1_MOUSE Cytochrome c1, heme protein, mitochondrial OS=Mus musculus GN=Cyc1 PE=1 SV=1	1.57	1.59	245.1	48494.2	1	1	0	2.15	325	5189
>sp|Q9D0M3-2|CY1_MOUSE Isoform 2 of Cytochrome c1, heme protein, mitochondrial OS=Mus musculus GN=Cyc1
>Reverse >sp|Q9ESN3|TMM8A_MOUSE Transmembrane protein 8A OS=Mus musculus GN=Tmem8a PE=2 SV=1	1.57	1.61	157.1	16994.1	1	1	1	1.3	769	45992
>sp|O35490|BHMT1_MOUSE Betaine--homocysteine S-methyltransferase 1 OS=Mus musculus GN=Bhmt PE=2 SV=1	1.57	1.59	278.5	64230.8	1	1	0	2.21	407	2008
>Reverse >sp|Q9WV68|DECR2_MOUSE Peroxisomal 2,4-dienoyl-CoA reductase OS=Mus musculus GN=Decr2 PE=1 SV=1	1.56	1.58	316.9	258019	1	1	0	2.74	292	29690
>sp|Q9D2U9|H2B3A_MOUSE Histone H2B type 3-A OS=Mus musculus GN=Hist3h2ba PE=1 SV=3	1.52	1.32	193.8	42804.2	2	2	0	12.7	126	8983
>sp|Q8CGP0|H2B3B_MOUSE Histone H2B type 3-B OS=Mus musculus GN=Hist3h2bb PE=1 SV=3
>Reverse >sp|Q8BJN4|FNDC9_MOUSE Fibronectin type III domain-containing protein 9 OS=Mus musculus GN=Fndc9 PE=2 SV=1	1.5	1.51	31.7	56905.8	1	1	0	6.19	226	31948
>sp|Q61941|NNTM_MOUSE NAD(P) transhydrogenase, mitochondrial OS=Mus musculus GN=Nnt PE=1 SV=2	1.48	1.53	225.1	156561	3	2	1	1.84	1086	14157
>sp|Q63880|EST31_MOUSE Liver carboxylesterase 31 OS=Mus musculus GN=Es31 PE=1 SV=2	1.48	1.51	217.7	33964.5	1	1	0	2.1	571	6803
>sp|Q63880-2|EST31_MOUSE Isoform 2 of Liver carboxylesterase 31 OS=Mus musculus GN=Es31
>sp|Q64521|GPDM_MOUSE Glycerol-3-phosphate dehydrogenase, mitochondrial OS=Mus musculus GN=Gpd2 PE=1 SV=2	1.45	1.47	99.1	24432.3	2	1	0	1.51	727	8603
>sp|O89023|TPP1_MOUSE Tripeptidyl-peptidase 1 OS=Mus musculus GN=Tpp1 PE=1 SV=2	1.43	1.47	125.4	64911.7	1	1	0	2.49	562	22020
>Reverse >sp|Q61139|PCSK7_MOUSE Proprotein convertase subtilisin/kexin type 7 OS=Mus musculus GN=Pcsk7 PE=2 SV=2	1.43	1.48	66.6	119583	1	1	1	2.73	770	39518
>sp|Q8VCH0|THIKB_MOUSE 3-ketoacyl-CoA thiolase B, peroxisomal OS=Mus musculus GN=Acaa1b PE=2 SV=1	1.41	1.43	159.5	102683	2	2	0	4.95	424	21318
>sp|P33174|KIF4_MOUSE Chromosome-associated kinesin KIF4 OS=Mus musculus GN=Kif4 PE=2 SV=3	1.41	1.46	253.5	267792	2	1	0	0.57	1231	11071
>sp|Q60649|CLPB_MOUSE Caseinolytic peptidase B protein homolog OS=Mus musculus GN=Clpb PE=1 SV=1	1.41	1.43	217.6	99580.3	2	1	0	1.62	677	4104
>sp|Q61176|ARGI1_MOUSE Arginase-1 OS=Mus musculus GN=Arg1 PE=1 SV=1	1.41	1.43	169.7	33869.3	1	1	0	2.48	323	1251
>sp|Q9DC53|CPNE8_MOUSE Copine-8 OS=Mus musculus GN=Cpne8 PE=2 SV=2	1.39	1.42	269.1	100691	1	1	0	1.42	564	4632
>Reverse >sp|Q9D4P7|GSTT4_MOUSE Glutathione S-transferase theta-4 OS=Mus musculus GN=Gstt4 PE=2 SV=1	1.36	1.37	61.3	13495.5	1	1	0	5.83	240	33092
>sp|Q3TQB2|FXRD1_MOUSE FAD-dependent oxidoreductase domain-containing protein 1 OS=Mus musculus GN=Foxred1 PE=2 SV=1	1.3	0.96	205.1	87914.2	2	2	0	4.31	487	7958
>sp|Q3TQB2-2|FXRD1_MOUSE Isoform 2 of FAD-dependent oxidoreductase domain-containing protein 1 OS=Mus musculus GN=Foxred1
>sp|Q62452|UD19_MOUSE UDP-glucuronosyltransferase 1-9 OS=Mus musculus GN=Ugt1a9 PE=1 SV=3	1.29	1.07	216.2	142305	3	2	0	3.03	528	22848
>sp|P59644|PI5PA_MOUSE Phosphatidylinositol 4,5-bisphosphate 5-phosphatase A OS=Mus musculus GN=Inpp5j PE=1 SV=2	1.29	1.34	241.9	118312	2	2	2	2.09	1003	15697
>Reverse >sp|Q8BSD5|SHE_MOUSE SH2 domain-containing adapter protein E OS=Mus musculus GN=She PE=2 SV=1	1.27	1.3	253.8	88155.5	1	1	0	1.63	492	43462
>sp|Q9JJ59|ABCB9_MOUSE ATP-binding cassette sub-family B member 9 OS=Mus musculus GN=Abcb9 PE=2 SV=1	1.25	1.3	253.5	47024.9	1	1	0	0.92	762	170
>sp|Q9JJ59-2|ABCB9_MOUSE Isoform 2 of ATP-binding cassette sub-family B member 9 OS=Mus musculus GN=Abcb9
>Reverse >sp|Q8BGA7|CG026_MOUSE Uncharacterized protein C7orf26 homolog OS=Mus musculus PE=2 SV=1	1.21	1.24	96.2	68015.9	1	1	1	17.19	448	27795

## Sheet: Spot 3
Description	|Log Prob|	Best |Log Prob|	Best score	Total Intensity	# of spectra	# of unique peptides	# of mod peptides	Coverage %	# AA's in protein	Protein DB number
>sp|P47738|ALDH2_MOUSE Aldehyde dehydrogenase, mitochondrial OS=Mus musculus GN=Aldh2 PE=1 SV=1	224.45	8.57	656.7	1.42684e+08	566	58	13	56.45	519	776
>sp|Q9EQ20|MMSA_MOUSE Methylmalonate-semialdehyde dehydrogenase [acylating], mitochondrial OS=Mus musculus GN=Aldh6a1 PE=1 SV=1	217.46	13.24	792.1	2.91623e+07	145	54	22	55.7	535	12968
>sp|Q8C196|CPSM_MOUSE Carbamoyl-phosphate synthase [ammonia], mitochondrial OS=Mus musculus GN=Cps1 PE=1 SV=2	213.4	8.35	607.6	7.68885e+06	86	66	17	37.47	1500	4652
>sp|Q9DBF1|AL7A1_MOUSE Alpha-aminoadipic semialdehyde dehydrogenase OS=Mus musculus GN=Aldh7a1 PE=1 SV=4	188.19	11.18	713	40562448	182	46	21	49.17	539	767
>sp|Q03265|ATPA_MOUSE ATP synthase subunit alpha, mitochondrial OS=Mus musculus GN=Atp5a1 PE=1 SV=1	178.18	11.18	717.6	4.929e+07	175	60	23	52.26	553	1671
>sp|Q9CZS1|AL1B1_MOUSE Aldehyde dehydrogenase X, mitochondrial OS=Mus musculus GN=Aldh1b1 PE=2 SV=1	176.71	10.21	672.1	4.13235e+07	151	52	16	57.03	519	754
>sp|P26443|DHE3_MOUSE Glutamate dehydrogenase 1, mitochondrial OS=Mus musculus GN=Glud1 PE=1 SV=1	142.6	8.48	559.1	1.08453e+07	90	44	16	56.27	558	5628
>sp|P50544|ACADV_MOUSE Very long-chain specific acyl-CoA dehydrogenase, mitochondrial OS=Mus musculus GN=Acadvl PE=1 SV=3	131.76	6.84	548.4	8.49255e+06	42	33	10	36.74	656	261
>sp|P24270|CATA_MOUSE Catalase OS=Mus musculus GN=Cat PE=1 SV=4	122.75	6.67	544.2	8.77673e+06	74	42	13	56.74	527	2638
>sp|Q9CPY7|AMPL_MOUSE Cytosol aminopeptidase OS=Mus musculus GN=Lap3 PE=1 SV=3	108.7	10.11	603.1	6.66227e+06	55	32	10	48.17	519	857
>sp|Q9JLJ2|AL9A1_MOUSE 4-trimethylaminobutyraldehyde dehydrogenase OS=Mus musculus GN=Aldh9a1 PE=1 SV=1	106.96	9.64	614.6	7.30497e+06	41	30	11	42.51	494	770
>sp|K2C1_HUMAN|(Common contaminant protein)	99.45	8.32	606.8	4.9164e+06	47	38	5	47.43	643	24165
>sp|Q99LB7|SARDH_MOUSE Sarcosine dehydrogenase, mitochondrial OS=Mus musculus GN=Sardh PE=1 SV=1	94.11	6.06	415.1	5.76269e+06	46	31	8	27.2	919	18698
>sp|O08749|DLDH_MOUSE Dihydrolipoyl dehydrogenase, mitochondrial OS=Mus musculus GN=Dld PE=1 SV=2	88.77	6.71	470.8	8.34419e+06	64	31	11	35.95	509	5743
>sp|K22E_HUMAN|(Common contaminant protein)	84.72	7.73	487.6	2.56318e+06	28	25	1	46.82	645	24164
>sp|Q8BWF0|SSDH_MOUSE Succinate-semialdehyde dehydrogenase, mitochondrial OS=Mus musculus GN=Aldh5a1 PE=1 SV=1	76.72	5.91	489.3	4.93144e+06	36	26	6	35.56	523	20216
>sp|Q99MN9|PCCB_MOUSE Propionyl-CoA carboxylase beta chain, mitochondrial OS=Mus musculus GN=Pccb PE=1 SV=2	74.3	7.03	534.8	2.20934e+06	28	19	2	37.52	541	15240
>sp|Q8K2B3|DHSA_MOUSE Succinate dehydrogenase [ubiquinone] flavoprotein subunit, mitochondrial OS=Mus musculus GN=Sdha PE=1 SV=1	68.21	7.71	646.5	3.93281e+06	27	21	5	31.33	664	5643
>sp|Q8VCT4|CES3_MOUSE Carboxylesterase 3 OS=Mus musculus GN=Ces3 PE=1 SV=1	64.57	5.68	489.9	2.96577e+06	29	18	4	27.96	565	3521
>sp|K1C9_HUMAN|(Common contaminant protein)	63.75	6.81	541.1	2.95848e+06	29	22	7	45.43	623	24152
>sp|Q8CHT0|AL4A1_MOUSE Delta-1-pyrroline-5-carboxylate dehydrogenase, mitochondrial OS=Mus musculus GN=Aldh4a1 PE=1 SV=3	62.37	6.71	536.8	4.10092e+06	30	21	4	27.22	562	765
>sp|P27773|PDIA3_MOUSE Protein disulfide-isomerase A3 OS=Mus musculus GN=Pdia3 PE=1 SV=2	57.77	5.7	421.9	1.68962e+06	23	19	3	28.51	505	15382
>sp|Q99K67|AASS_MOUSE Alpha-aminoadipic semialdehyde synthase, mitochondrial OS=Mus musculus GN=Aass PE=2 SV=1	55.83	5.43	532	2.66875e+06	23	17	5	16.52	926	142
>sp|P54869|HMCS2_MOUSE Hydroxymethylglutaryl-CoA synthase, mitochondrial OS=Mus musculus GN=Hmgcs2 PE=1 SV=2	55.52	5.93	434.6	2.11456e+06	22	18	7	21.46	508	9320
>sp|K1C10_HUMAN|(Common contaminant protein)	55.28	6.53	450.1	2.74875e+06	25	18	3	26.64	593	24150
>sp|P56593|CP2AC_MOUSE Cytochrome P450 2A12 OS=Mus musculus GN=Cyp2a12 PE=1 SV=2	52.02	6.6	474.2	1.44415e+06	16	16	2	33.74	492	4570
>sp|Q8BGH2|SAM50_MOUSE Sorting and assembly machinery component 50 homolog OS=Mus musculus GN=Samm50 PE=1 SV=1	51.58	6.76	576.2	2.21128e+06	20	16	3	30.06	469	18678
>sp|P20060|HEXB_MOUSE Beta-hexosaminidase subunit beta OS=Mus musculus GN=Hexb PE=2 SV=2	50.9	5.05	461.9	3.1338e+06	23	21	4	29.1	536	9225
>sp|Q99KI0|ACON_MOUSE Aconitate hydratase, mitochondrial OS=Mus musculus GN=Aco2 PE=1 SV=1	46.04	5.78	468.2	1314625	18	15	1	19.62	780	350
>sp|Q8BGT5|ALAT2_MOUSE Alanine aminotransferase 2 OS=Mus musculus GN=Gpt2 PE=2 SV=1	45.44	6.44	545.2	1.74332e+06	18	14	5	26.44	522	772
>sp|P61922|GABT_MOUSE 4-aminobutyrate aminotransferase, mitochondrial OS=Mus musculus GN=Abat PE=1 SV=1	44.79	6.69	506.6	1144243	15	13	3	24.4	500	8029
>sp|Q9QXX4|CMC2_MOUSE Calcium-binding mitochondrial carrier protein Aralar2 OS=Mus musculus GN=Slc25a13 PE=1 SV=1	43.92	5.86	519.2	1.41862e+06	17	11	1	16.72	676	4135
>sp|Q9JJL8|SYSM_MOUSE Serine--tRNA ligase, mitochondrial OS=Mus musculus GN=Sars2 PE=2 SV=2	43.75	5.76	449.7	1.3231e+06	19	15	3	27.41	518	20631
>sp|Q921I1|TRFE_MOUSE Serotransferrin OS=Mus musculus GN=Tf PE=1 SV=1	43.02	5.79	515.5	1.08805e+06	14	12	0	19.94	697	22124
>sp|Q9R0H0|ACOX1_MOUSE Peroxisomal acyl-coenzyme A oxidase 1 OS=Mus musculus GN=Acox1 PE=1 SV=5	42.93	5.82	531.1	1.06156e+06	17	14	2	19.97	661	361
>sp|Q9CQN1|TRAP1_MOUSE Heat shock protein 75 kDa, mitochondrial OS=Mus musculus GN=Trap1 PE=1 SV=1	42.44	5.04	534.2	1.05647e+06	15	13	1	18.56	706	22105
>sp|Q3ULD5|MCCB_MOUSE Methylcrotonoyl-CoA carboxylase beta chain, mitochondrial OS=Mus musculus GN=Mccc2 PE=2 SV=1	41.5	5.52	478.2	1.02703e+06	14	14	3	27.71	563	12446
>sp|Q9DBT9|M2GD_MOUSE Dimethylglycine dehydrogenase, mitochondrial OS=Mus musculus GN=Dmgdh PE=1 SV=1	40.9	5.55	511.1	1.1293e+06	18	12	0	16.92	869	12140
>sp|Q9QXE0|HACL1_MOUSE 2-hydroxyacyl-CoA lyase 1 OS=Mus musculus GN=Hacl1 PE=1 SV=2	40.87	5.44	313.2	716984	19	14	4	22.72	581	9039
>sp|Q8C165|P20D1_MOUSE Probable carboxypeptidase PM20D1 OS=Mus musculus GN=Pm20d1 PE=2 SV=1	40.39	9.35	658.6	988951	11	10	1	23.66	503	14936
>sp|Q91ZA3|PCCA_MOUSE Propionyl-CoA carboxylase alpha chain, mitochondrial OS=Mus musculus GN=Pcca PE=2 SV=2	39.94	5.84	428.9	853034	12	11	2	18.78	724	15239
>sp|Q8VCW8|ACSF2_MOUSE Acyl-CoA synthetase family member 2, mitochondrial OS=Mus musculus GN=Acsf2 PE=2 SV=1	39.72	5.89	475.4	762463	10	10	2	13.98	615	373
>sp|P11725|OTC_MOUSE Ornithine carbamoyltransferase, mitochondrial OS=Mus musculus GN=Otc PE=1 SV=1	39.56	4.94	442.2	1.33346e+06	17	14	4	31.64	354	14875
>sp|P97742|CPT1A_MOUSE Carnitine O-palmitoyltransferase 1, liver isoform OS=Mus musculus GN=Cpt1a PE=2 SV=4	38	4.95	464.3	1.63746e+06	18	13	2	17.08	773	4653
>sp|Q05920|PYC_MOUSE Pyruvate carboxylase, mitochondrial OS=Mus musculus GN=Pc PE=1 SV=1	35.99	4.34	445.7	1.9453e+06	24	20	5	14.69	1178	16878
>sp|Q9Z0X1|AIFM1_MOUSE Apoptosis-inducing factor 1, mitochondrial OS=Mus musculus GN=Aifm1 PE=1 SV=1	35.57	5.96	504.2	791013	11	10	1	19.12	612	672
>sp|Q9QXS1|PLEC_MOUSE Plectin OS=Mus musculus GN=Plec PE=1 SV=2	34.93	4.97	375.4	1.48145e+06	22	20	2	4.14	4691	15978
>sp|Q9QXS1-2|PLEC_MOUSE Isoform PLEC-1 of Plectin OS=Mus musculus GN=Plec
>sp|Q9QXS1-3|PLEC_MOUSE Isoform PLEC-1A of Plectin OS=Mus musculus GN=Plec
>sp|Q9QXS1-4|PLEC_MOUSE Isoform PLEC-1B,2A of Plectin OS=Mus musculus GN=Plec
>sp|Q9QXS1-5|PLEC_MOUSE Isoform PLEC-1B of Plectin OS=Mus musculus GN=Plec
>sp|Q9QXS1-9|PLEC_MOUSE Isoform PLEC-1D,2A of Plectin OS=Mus musculus GN=Plec
>sp|Q9QXS1-10|PLEC_MOUSE Isoform PLEC-1D of Plectin OS=Mus musculus GN=Plec
>sp|Q9QXS1-11|PLEC_MOUSE Isoform PLEC-1E,2A of Plectin OS=Mus musculus GN=Plec
>sp|Q9QXS1-12|PLEC_MOUSE Isoform PLEC-1E of Plectin OS=Mus musculus GN=Plec
>sp|Q9QXS1-13|PLEC_MOUSE Isoform PLEC-1F of Plectin OS=Mus musculus GN=Plec
>sp|Q9QXS1-14|PLEC_MOUSE Isoform PLEC-1G of Plectin OS=Mus musculus GN=Plec
>sp|Q9QXS1-15|PLEC_MOUSE Isoform PLEC-1H of Plectin OS=Mus musculus GN=Plec
>sp|Q9QXS1-16|PLEC_MOUSE Isoform PLEC-1I of Plectin OS=Mus musculus GN=Plec
>sp|P60710|ACTB_MOUSE Actin, cytoplasmic 1 OS=Mus musculus GN=Actb PE=1 SV=1	34.63	5.36	478.2	1.74701e+06	15	11	2	27.2	375	400
>sp|P63260|ACTG_MOUSE Actin, cytoplasmic 2 OS=Mus musculus GN=Actg1 PE=1 SV=1
>sp|Q9QXC1|FETUB_MOUSE Fetuin-B OS=Mus musculus GN=Fetub PE=1 SV=1	34.34	7.39	526.1	1.14224e+06	12	7	1	22.94	388	7506
>sp|Q05421|CP2E1_MOUSE Cytochrome P450 2E1 OS=Mus musculus GN=Cyp2e1 PE=1 SV=1	33.73	5.72	419.2	1.68022e+06	19	14	2	22.11	493	4580
>sp|P63038|CH60_MOUSE 60 kDa heat shock protein, mitochondrial OS=Mus musculus GN=Hspd1 PE=1 SV=1	33.66	4.77	430.9	1.09008e+06	12	12	2	22.69	573	3647
>sp|P50285|FMO1_MOUSE Dimethylaniline monooxygenase [N-oxide-forming] 1 OS=Mus musculus GN=Fmo1 PE=1 SV=1	33.2	5.92	329.2	1028356	13	12	0	21.62	532	7689
>sp|Q63886|UD11_MOUSE UDP-glucuronosyltransferase 1-1 OS=Mus musculus GN=Ugt1a1 PE=2 SV=2	33.05	4.54	410.2	3.06665e+06	21	15	4	21.68	535	22844
>sp|P32020|NLTP_MOUSE Non-specific lipid-transfer protein OS=Mus musculus GN=Scp2 PE=1 SV=3	32.81	4.85	319.2	1.83833e+06	21	15	4	31.63	547	14127
>sp|P51174|ACADL_MOUSE Long-chain specific acyl-CoA dehydrogenase, mitochondrial OS=Mus musculus GN=Acadl PE=2 SV=2	30.57	6.36	358	847084	10	8	3	20.7	430	258
>sp|Q8BWT1|THIM_MOUSE 3-ketoacyl-CoA thiolase, mitochondrial OS=Mus musculus GN=Acaa2 PE=1 SV=3	30.09	5.75	494.3	709158	10	9	1	27.46	397	21320
>sp|Q71RI9|KAT3_MOUSE Kynurenine--oxoglutarate transaminase 3 OS=Mus musculus GN=Ccbl2 PE=1 SV=1	29.75	4.64	316.7	633558	12	10	1	19.34	455	10761
>sp|Q71RI9-2|KAT3_MOUSE Isoform 2 of Kynurenine--oxoglutarate transaminase 3 OS=Mus musculus GN=Ccbl2
>sp|Q921G7|ETFD_MOUSE Electron transfer flavoprotein-ubiquinone oxidoreductase, mitochondrial OS=Mus musculus GN=Etfdh PE=1 SV=1	29.08	4.89	431.1	909337	12	12	1	19.32	616	6821
>sp|O70456|1433S_MOUSE 14-3-3 protein sigma OS=Mus musculus GN=Sfn PE=1 SV=2	28.79	4.97	447.5	2.62185e+06	14	9	2	19.35	248	6
>sp|E9Q557|DESP_MOUSE Desmoplakin OS=Mus musculus GN=Dsp PE=3 SV=1	28.5	4.15	333.5	2.10708e+06	22	19	0	5.52	2883	5540
>sp|Q99MR8|MCCA_MOUSE Methylcrotonoyl-CoA carboxylase subunit alpha, mitochondrial OS=Mus musculus GN=Mccc1 PE=2 SV=2	27.97	5.65	345.9	704208	10	9	0	15.34	717	12445
>sp|P38647|GRP75_MOUSE Stress-70 protein, mitochondrial OS=Mus musculus GN=Hspa9 PE=1 SV=2	26.65	5.66	362.9	384433	8	8	1	14.43	679	8805
>sp|Q61781|K1C14_MOUSE Keratin, type I cytoskeletal 14 OS=Mus musculus GN=Krt14 PE=1 SV=2	26.45	6.09	398.8	2351490	18	11	1	16.32	484	10667
>sp|P48678|LMNA_MOUSE Prelamin-A/C OS=Mus musculus GN=Lmna PE=1 SV=2	26.37	5.54	354.8	1.81979e+06	15	11	1	16.99	665	11750
>sp|P48678-2|LMNA_MOUSE Isoform C of Prelamin-A/C OS=Mus musculus GN=Lmna
>sp|Q3UEG6|AGT2_MOUSE Alanine--glyoxylate aminotransferase 2, mitochondrial OS=Mus musculus GN=Agxt2 PE=2 SV=1	25.35	4.9	361.9	949085	11	10	2	15.98	513	650
>sp|P07356|ANXA2_MOUSE Annexin A2 OS=Mus musculus GN=Anxa2 PE=1 SV=2	24.34	5.54	394.4	845188	11	8	0	23.3	339	1063
>sp|P45952|ACADM_MOUSE Medium-chain specific acyl-CoA dehydrogenase, mitochondrial OS=Mus musculus GN=Acadm PE=1 SV=1	23.96	5.01	389.4	783514	10	8	1	21.38	421	259
>sp|P41216|ACSL1_MOUSE Long-chain-fatty-acid--CoA ligase 1 OS=Mus musculus GN=Acsl1 PE=1 SV=2	23.35	4.41	367.9	1.46234e+06	16	14	1	17.74	699	379
>sp|Q99K23|UFSP2_MOUSE Ufm1-specific protease 2 OS=Mus musculus GN=Ufsp2 PE=1 SV=1	22.72	6.06	423.3	768712	11	10	1	25.16	461	22871
>sp|P70696|H2B1A_MOUSE Histone H2B type 1-A OS=Mus musculus GN=Hist1h2ba PE=2 SV=3	22.67	4.51	515.7	2.42586e+06	15	7	1	38.58	127	8972
>sp|Q64475|H2B1B_MOUSE Histone H2B type 1-B OS=Mus musculus GN=Hist1h2bb PE=1 SV=3
>sp|Q6ZWY9|H2B1C_MOUSE Histone H2B type 1-C/E/G OS=Mus musculus GN=Hist1h2bc PE=1 SV=3
>sp|P10853|H2B1F_MOUSE Histone H2B type 1-F/J/L OS=Mus musculus GN=Hist1h2bf PE=1 SV=2
>sp|Q64478|H2B1H_MOUSE Histone H2B type 1-H OS=Mus musculus GN=Hist1h2bh PE=1 SV=3
>sp|Q8CGP1|H2B1K_MOUSE Histone H2B type 1-K OS=Mus musculus GN=Hist1h2bk PE=1 SV=3
>sp|P10854|H2B1M_MOUSE Histone H2B type 1-M OS=Mus musculus GN=Hist1h2bm PE=1 SV=2
>sp|Q8CGP2|H2B1P_MOUSE Histone H2B type 1-P OS=Mus musculus GN=Hist1h2bp PE=1 SV=3
>sp|Q8CGP2-2|H2B1P_MOUSE Isoform 2 of Histone H2B type 1-P OS=Mus musculus GN=Hist1h2bp
>sp|Q64525|H2B2B_MOUSE Histone H2B type 2-B OS=Mus musculus GN=Hist2h2bb PE=1 SV=3
>sp|Q91X77|CY250_MOUSE Cytochrome P450 2C50 OS=Mus musculus GN=Cyp2c50 PE=1 SV=2	22.52	4.94	437	995521	11	10	0	21.22	490	5194
>sp|B7ZMP1|XPP3_MOUSE Probable Xaa-Pro aminopeptidase 3 OS=Mus musculus GN=Xpnpep3 PE=2 SV=1	22.04	4.97	392.2	622098	8	7	0	13.24	506	23546
>sp|P25688|URIC_MOUSE Uricase OS=Mus musculus GN=Uox PE=1 SV=2	21.92	4.95	414.3	872656	8	7	0	23.1	303	22959
>sp|Q8BW75|AOFB_MOUSE Amine oxidase [flavin-containing] B OS=Mus musculus GN=Maob PE=1 SV=4	21.75	4.58	361.5	558264	9	8	2	12.31	520	1076
>sp|P08249|MDHM_MOUSE Malate dehydrogenase, mitochondrial OS=Mus musculus GN=Mdh2 PE=1 SV=3	21.37	5.06	420.2	316467	6	6	0	22.78	338	12516
>sp|P52196|THTR_MOUSE Thiosulfate sulfurtransferase OS=Mus musculus GN=Tst PE=1 SV=3	21.05	7.19	437.1	666924	9	7	1	28.62	297	21351
>sp|TRYP_PIG|(Common contaminant protein)	20.64	6.55	481.8	4.33313e+06	17	6	4	16.45	231	24193
>sp|Q91VA0|ACSM1_MOUSE Acyl-coenzyme A synthetase ACSM1, mitochondrial OS=Mus musculus GN=Acsm1 PE=1 SV=1	20.1	5.35	383.2	339325	5	5	1	7.85	573	386
>sp|Q8VCM8|NCLN_MOUSE Nicalin OS=Mus musculus GN=Ncln PE=2 SV=2	20.08	4.93	334.2	832690	11	10	3	15.81	563	13729
>sp|Q571F8|GLSL_MOUSE Glutaminase liver isoform, mitochondrial OS=Mus musculus GN=Gls2 PE=2 SV=2	19.99	4.66	376.1	685468	10	7	1	11.63	602	8403
>sp|P56480|ATPB_MOUSE ATP synthase subunit beta, mitochondrial OS=Mus musculus GN=Atp5b PE=1 SV=2	19.83	6.08	362.5	156724	4	4	0	11.72	529	1672
>sp|Q8QZY2|GLCTK_MOUSE Glycerate kinase OS=Mus musculus GN=Glyctk PE=2 SV=1	19.8	4.91	305.2	377466	5	5	0	12.24	523	8352
>sp|Q01339|APOH_MOUSE Beta-2-glycoprotein 1 OS=Mus musculus GN=Apoh PE=1 SV=1	19.12	4.67	351.6	659068	7	7	0	20	345	1178
>sp|Q7TNG8|LDHD_MOUSE Probable D-lactate dehydrogenase, mitochondrial OS=Mus musculus GN=Ldhd PE=1 SV=1	18.85	5.66	354.5	627268	8	8	1	20.45	484	11555
>sp|Q8BGA8|ACSM5_MOUSE Acyl-coenzyme A synthetase ACSM5, mitochondrial OS=Mus musculus GN=Acsm5 PE=2 SV=1	18.74	5.51	376.5	373977	9	8	1	15.57	578	394
>sp|Q64458|CP2CT_MOUSE Cytochrome P450 2C29 OS=Mus musculus GN=Cyp2c29 PE=1 SV=2	18.61	4.59	437.4	710522	9	9	1	19.18	490	4575
>sp|P05064|ALDOA_MOUSE Fructose-bisphosphate aldolase A OS=Mus musculus GN=Aldoa PE=1 SV=2	18.52	6.03	371.5	335048	7	4	0	11.54	364	777
>sp|P43274|H14_MOUSE Histone H1.4 OS=Mus musculus GN=Hist1h1e PE=1 SV=2	18.18	5.46	408.9	412601	7	5	0	22.37	219	8949
>sp|P47740|AL3A2_MOUSE Fatty aldehyde dehydrogenase OS=Mus musculus GN=Aldh3a2 PE=2 SV=2	17.99	5.03	270.2	921774	16	12	3	18.6	484	763
>sp|Q9JLT4|TRXR2_MOUSE Thioredoxin reductase 2, mitochondrial OS=Mus musculus GN=Txnrd2 PE=1 SV=4	17.84	4.24	373.4	768624	11	8	2	16.79	524	22300
>sp|Q9JLT4-2|TRXR2_MOUSE Isoform 2 of Thioredoxin reductase 2, mitochondrial OS=Mus musculus GN=Txnrd2
>sp|Q9JLT4-4|TRXR2_MOUSE Isoform 4 of Thioredoxin reductase 2, mitochondrial OS=Mus musculus GN=Txnrd2
>sp|P34914|HYES_MOUSE Epoxide hydrolase 2 OS=Mus musculus GN=Ephx2 PE=1 SV=2	17.8	7.63	437.1	586996	6	3	0	7.76	554	9668
>sp|P34914-2|HYES_MOUSE Isoform 2 of Epoxide hydrolase 2 OS=Mus musculus GN=Ephx2
>sp|P17717|UDB17_MOUSE UDP-glucuronosyltransferase 2B17 OS=Mus musculus GN=Ugt2b17 PE=2 SV=1	17.72	4.86	382.4	830842	7	6	0	10.94	530	22854
>sp|P20029|GRP78_MOUSE 78 kDa glucose-regulated protein OS=Mus musculus GN=Hspa5 PE=1 SV=3	17.64	4.99	420	208974	6	5	0	10.08	655	8806
>sp|Q9DBF1-2|AL7A1_MOUSE Isoform 2 of Alpha-aminoadipic semialdehyde dehydrogenase OS=Mus musculus GN=Aldh7a1	16.62	9.21	613.2	1.47792e+06	7	2	1	3.33	511	768
>sp|Q8CAQ8-3|IMMT_MOUSE Isoform 3 of Mitochondrial inner membrane protein OS=Mus musculus GN=Immt	16.25	5.63	370.7	419437	6	6	0	9.17	709	10078
>sp|Q9DCN1|NUD12_MOUSE Peroxisomal NADH pyrophosphatase NUDT12 OS=Mus musculus GN=Nudt12 PE=2 SV=1	15.56	3.64	309	876450	9	7	1	16.02	462	14522
>sp|Q91X34|BAAT_MOUSE Bile acid-CoA:amino acid N-acyltransferase OS=Mus musculus GN=Baat PE=1 SV=1	15.31	4.73	461.5	1.25541e+06	10	6	0	12.86	420	1823
>sp|Q9D0K2|SCOT1_MOUSE Succinyl-CoA:3-ketoacid-coenzyme A transferase 1, mitochondrial OS=Mus musculus GN=Oxct1 PE=1 SV=1	15.28	4.61	347.3	292599	5	5	0	9.42	520	18860
>sp|Q922Q1|MOSC2_MOUSE MOSC domain-containing protein 2, mitochondrial OS=Mus musculus GN=Marc2 PE=1 SV=1	14.99	4.69	299.1	477755	7	6	0	14.2	338	13043
>sp|Q9DBN5|LONP2_MOUSE Lon protease homolog 2, peroxisomal OS=Mus musculus GN=Lonp2 PE=2 SV=1	14.72	5.42	269.6	197334	6	5	1	6.22	852	11780
>sp|Q921X9|PDIA5_MOUSE Protein disulfide-isomerase A5 OS=Mus musculus GN=Pdia5 PE=2 SV=1	14.56	5.65	356.8	355107	6	6	0	13.54	517	15384
>sp|Q922U2|K2C5_MOUSE Keratin, type II cytoskeletal 5 OS=Mus musculus GN=Krt5 PE=1 SV=1	14.44	4.95	427.7	487640	5	5	1	8.1	580	10703
>sp|P10107|ANXA1_MOUSE Annexin A1 OS=Mus musculus GN=Anxa1 PE=1 SV=2	14.21	4.85	498.7	950830	8	6	0	13.01	346	1062
>sp|P14211|CALR_MOUSE Calreticulin OS=Mus musculus GN=Calr PE=1 SV=1	13.88	4.93	395.1	498689	7	5	0	12.02	416	2532
>sp|Q9DC50|OCTC_MOUSE Peroxisomal carnitine O-octanoyltransferase OS=Mus musculus GN=Crot PE=1 SV=1	13.71	6.28	339.8	291246	6	5	1	9.8	612	14646
>sp|P15392|CP2A4_MOUSE Cytochrome P450 2A4 OS=Mus musculus GN=Cyp2a4 PE=2 SV=2	13.6	4.83	371.1	232429	6	5	0	10.53	494	4568
>sp|Q8BGC4|ZADH2_MOUSE Zinc-binding alcohol dehydrogenase domain-containing protein 2 OS=Mus musculus GN=Zadh2 PE=2 SV=1	13.49	5.86	333.8	233930	6	5	0	17.51	377	23658
>sp|Q8QZT1|THIL_MOUSE Acetyl-CoA acetyltransferase, mitochondrial OS=Mus musculus GN=Acat1 PE=1 SV=1	13.24	4.99	380.2	185699	5	5	0	19.58	424	21319
>sp|Q64464|CP3AD_MOUSE Cytochrome P450 3A13 OS=Mus musculus GN=Cyp3a13 PE=2 SV=1	13.22	3.58	299.5	382941	7	7	1	12.52	503	4592
>sp|O35423|SPYA_MOUSE Serine--pyruvate aminotransferase, mitochondrial OS=Mus musculus GN=Agxt PE=1 SV=2	12.85	5.87	395.4	215595	4	4	0	11.38	413	20097
>sp|O35423-2|SPYA_MOUSE Isoform Peroxisomal of Serine--pyruvate aminotransferase, mitochondrial OS=Mus musculus GN=Agxt
>sp|Q61495|DSG1A_MOUSE Desmoglein-1-alpha OS=Mus musculus GN=Dsg1a PE=2 SV=2	12.51	4.71	268.4	243200	6	4	2	1.51	1057	6074
>sp|Q7TSF1|DSG1B_MOUSE Desmoglein-1-beta OS=Mus musculus GN=Dsg1b PE=1 SV=1
>sp|P20108|PRDX3_MOUSE Thioredoxin-dependent peroxide reductase, mitochondrial OS=Mus musculus GN=Prdx3 PE=1 SV=1	12.5	4.74	372	279589	6	5	1	15.95	257	16430
>sp|P62806|H4_MOUSE Histone H4 OS=Mus musculus GN=Hist1h4a PE=1 SV=2	12.31	4.92	481	1.59643e+06	4	3	0	31.07	103	8990
>sp|P26041|MOES_MOUSE Moesin OS=Mus musculus GN=Msn PE=1 SV=3	11.96	3.62	332	1.33099e+06	9	8	1	11.61	577	13016
>sp|Q3TQB2|FXRD1_MOUSE FAD-dependent oxidoreductase domain-containing protein 1 OS=Mus musculus GN=Foxred1 PE=2 SV=1	11.89	4.01	282.4	371958	5	4	0	8.62	487	7958
>sp|Q3TQB2-2|FXRD1_MOUSE Isoform 2 of FAD-dependent oxidoreductase domain-containing protein 1 OS=Mus musculus GN=Foxred1
>sp|Q9QWL7|K1C17_MOUSE Keratin, type I cytoskeletal 17 OS=Mus musculus GN=Krt17 PE=1 SV=3	11.8	4.51	304.4	250801	7	4	1	12.01	433	10670
>sp|Q9DBG1|CP27A_MOUSE Sterol 26-hydroxylase, mitochondrial OS=Mus musculus GN=Cyp27a1 PE=1 SV=1	11.59	5.02	476.5	305654	4	4	1	9.76	533	4566
>sp|P05202|AATM_MOUSE Aspartate aminotransferase, mitochondrial OS=Mus musculus GN=Got2 PE=1 SV=1	11.46	5.67	386.2	199883	4	3	0	7.67	430	150
>sp|P50446|K2C6A_MOUSE Keratin, type II cytoskeletal 6A OS=Mus musculus GN=Krt6a PE=2 SV=3	11.33	4.8	346.4	672751	5	4	0	7.59	553	10704
>sp|Q99LC5|ETFA_MOUSE Electron transfer flavoprotein subunit alpha, mitochondrial OS=Mus musculus GN=Etfa PE=1 SV=2	11.14	4.88	389.3	449154	6	5	1	12.61	333	6819
>sp|P68372|TBB4B_MOUSE Tubulin beta-4B chain OS=Mus musculus GN=Tubb4b PE=1 SV=1	11.03	5.67	325.9	194524	3	3	1	4.72	445	20910
>sp|Q8K0E8|FIBB_MOUSE Fibrinogen beta chain OS=Mus musculus GN=Fgb PE=2 SV=1	11.02	3.55	359.1	445724	7	7	0	16.84	481	7600
>sp|Q8BFR5|EFTU_MOUSE Elongation factor Tu, mitochondrial OS=Mus musculus GN=Tufm PE=1 SV=1	10.88	3.61	292.3	443762	6	5	1	14.16	452	6401
>sp|P18242|CATD_MOUSE Cathepsin D OS=Mus musculus GN=Ctsd PE=1 SV=1	10.88	6.42	253.4	97228.4	3	2	1	4.39	410	2641
>sp|P12790|CP2B9_MOUSE Cytochrome P450 2B9 OS=Mus musculus GN=Cyp2b9 PE=2 SV=1	10.82	4.15	258.8	96744.9	3	3	0	6.52	491	4571
>sp|Q91W64|CP270_MOUSE Cytochrome P450 2C70 OS=Mus musculus GN=Cyp2c70 PE=2 SV=2	10.79	4.74	277.2	280442	4	4	0	9.2	489	4565
>sp|Q8R123-2|FAD1_MOUSE Isoform 2 of FAD synthase OS=Mus musculus GN=Flad1	10.75	3.81	314.6	766760	9	9	2	14.09	518	7277
>sp|Q9CZU6|CISY_MOUSE Citrate synthase, mitochondrial OS=Mus musculus GN=Cs PE=1 SV=1	10.71	4.72	252.3	171099	4	4	0	9.48	464	3812
>sp|Q9R269|PEPL_MOUSE Periplakin OS=Mus musculus GN=Ppl PE=1 SV=1	10.7	4.12	278.8	357812	4	4	0	2.17	1755	15475
>sp|Q9Z2I8|SUCB2_MOUSE Succinyl-CoA ligase [GDP-forming] subunit beta, mitochondrial OS=Mus musculus GN=Suclg2 PE=2 SV=3	10.47	5.86	324.6	90193.6	3	3	0	8.31	433	20453
>sp|Q9Z2I8-2|SUCB2_MOUSE Isoform 2 of Succinyl-CoA ligase [GDP-forming] subunit beta, mitochondrial OS=Mus musculus GN=Suclg2
>sp|Q8BH95|ECHM_MOUSE Enoyl-CoA hydratase, mitochondrial OS=Mus musculus GN=Echs1 PE=1 SV=1	10.41	4.32	268	221323	5	4	0	17.93	290	6302
>sp|Q99PL5|RRBP1_MOUSE Ribosome-binding protein 1 OS=Mus musculus GN=Rrbp1 PE=2 SV=2	10.28	4.77	293.3	351218	9	7	1	4.55	1605	18123
>sp|Q9DB77|QCR2_MOUSE Cytochrome b-c1 complex subunit 2, mitochondrial OS=Mus musculus GN=Uqcrc2 PE=1 SV=1	10.12	5.63	357.6	102009	2	2	0	5.74	453	16899
>sp|P97807|FUMH_MOUSE Fumarate hydratase, mitochondrial OS=Mus musculus GN=Fh PE=1 SV=3	10.07	6.78	421.6	85397.4	3	3	1	8.68	507	7908
>sp|P97807-2|FUMH_MOUSE Isoform Cytoplasmic of Fumarate hydratase, mitochondrial OS=Mus musculus GN=Fh
>sp|P56657|CP240_MOUSE Cytochrome P450 2C40 OS=Mus musculus GN=Cyp2c40 PE=2 SV=2	9.98	4.56	432	545717	7	6	0	12.63	491	4559
>sp|Q01853|TERA_MOUSE Transitional endoplasmic reticulum ATPase OS=Mus musculus GN=Vcp PE=1 SV=4	9.95	5.08	329.4	327335	5	3	0	3.97	806	21157
>sp|Q9CZX8|RS19_MOUSE 40S ribosomal protein S19 OS=Mus musculus GN=Rps19 PE=1 SV=3	9.88	4.28	363.5	433016	5	5	0	31.72	145	18170
>sp|Q8BH86-2|CN159_MOUSE Isoform 2 of UPF0317 protein C14orf159 homolog, mitochondrial OS=Mus musculus	9.84	3.34	163.3	151242	5	5	1	12.11	570	4179
>sp|Q9D7B6|ACAD8_MOUSE Isobutyryl-CoA dehydrogenase, mitochondrial OS=Mus musculus GN=Acad8 PE=2 SV=2	9.77	4.51	300.4	383441	7	7	1	15.74	413	256
>sp|P32261|ANT3_MOUSE Antithrombin-III OS=Mus musculus GN=Serpinc1 PE=1 SV=1	9.6	4.77	297.5	609532	11	8	1	19.35	465	1054
>sp|Q07417|ACADS_MOUSE Short-chain specific acyl-CoA dehydrogenase, mitochondrial OS=Mus musculus GN=Acads PE=2 SV=2	9.57	5.13	335.6	355344	4	4	1	13.59	412	260
>sp|P07901|HS90A_MOUSE Heat shock protein HSP 90-alpha OS=Mus musculus GN=Hsp90aa1 PE=1 SV=4	9.39	4.47	255.4	427361	6	4	0	8.87	733	9475
>sp|P68433|H31_MOUSE Histone H3.1 OS=Mus musculus GN=Hist1h3a PE=1 SV=2	9.33	3.65	428.9	1.21252e+06	5	4	0	18.38	136	8986
>sp|P84228|H32_MOUSE Histone H3.2 OS=Mus musculus GN=Hist1h3b PE=1 SV=2
>sp|P84244|H33_MOUSE Histone H3.3 OS=Mus musculus GN=H3f3a PE=1 SV=2
>sp|Q922Q8|LRC59_MOUSE Leucine-rich repeat-containing protein 59 OS=Mus musculus GN=Lrrc59 PE=2 SV=1	9.32	4.81	343.7	263457	5	4	0	13.36	307	11903
>sp|Q8VDD5|MYH9_MOUSE Myosin-9 OS=Mus musculus GN=Myh9 PE=1 SV=4	9.31	2.8	214.6	445318	7	7	1	3.88	1960	13453
>sp|Q8BTM8|FLNA_MOUSE Filamin-A OS=Mus musculus GN=Flna PE=1 SV=5	9.23	6.18	397.9	705776	4	4	1	1.81	2647	7655
>sp|Q8BG07|PLD4_MOUSE Phospholipase D4 OS=Mus musculus GN=Pld4 PE=2 SV=1	8.91	3.34	249	167813	5	4	0	7.95	503	15967
>sp|Q8BG07-2|PLD4_MOUSE Isoform 2 of Phospholipase D4 OS=Mus musculus GN=Pld4
>sp|P29758|OAT_MOUSE Ornithine aminotransferase, mitochondrial OS=Mus musculus GN=Oat PE=1 SV=1	8.81	5.39	304.5	140287	4	2	0	5.24	439	14624
>sp|P56654|CP237_MOUSE Cytochrome P450 2C37 OS=Mus musculus GN=Cyp2c37 PE=2 SV=2	8.75	5.05	326.1	61860.9	2	2	0	3.67	490	4556
>sp|P51881|ADT2_MOUSE ADP/ATP translocase 2 OS=Mus musculus GN=Slc25a5 PE=1 SV=3	8.7	4.7	377.4	403531	5	5	0	15.1	298	570
>sp|P61982|1433G_MOUSE 14-3-3 protein gamma OS=Mus musculus GN=Ywhag PE=1 SV=2	8.69	5.74	339	258414	4	4	1	15.79	247	5
>sp|P62984|RL40_MOUSE Ubiquitin-60S ribosomal protein L40 OS=Mus musculus GN=Uba52 PE=1 SV=2	8.62	5.68	348.7	781147	7	5	0	38.28	128	17741
>sp|Q9DCM0|ETHE1_MOUSE Protein ETHE1, mitochondrial OS=Mus musculus GN=Ethe1 PE=1 SV=2	8.6	4.28	331.5	189596	3	3	0	14.17	254	6822
>sp|P58252|EF2_MOUSE Elongation factor 2 OS=Mus musculus GN=Eef2 PE=1 SV=2	8.57	3.77	294	503001	6	5	0	5.83	858	6357
>sp|P01869|IGH1M_MOUSE Ig gamma-1 chain C region, membrane-bound form OS=Mus musculus GN=Ighg1 PE=1 SV=2	8.55	4.88	433.6	261747	3	3	0	8.4	393	9913
>sp|P01868|IGHG1_MOUSE Ig gamma-1 chain C region secreted form OS=Mus musculus GN=Ighg1 PE=1 SV=1
>sp|P47791|GSHR_MOUSE Glutathione reductase, mitochondrial OS=Mus musculus GN=Gsr PE=2 SV=3	8.47	4.99	359	352454	5	5	2	11	500	8846
>sp|P47791-2|GSHR_MOUSE Isoform Cytoplasmic of Glutathione reductase, mitochondrial OS=Mus musculus GN=Gsr
>sp|Q7TMR0|PCP_MOUSE Lysosomal Pro-X carboxypeptidase OS=Mus musculus GN=Prcp PE=2 SV=2	8.27	4.53	440	113081	2	2	0	4.68	491	15287
>sp|Q8VCC2|EST1_MOUSE Liver carboxylesterase 1 OS=Mus musculus GN=Ces1 PE=2 SV=1	8.21	4.52	424.6	95211.5	2	2	0	4.07	565	6801
>sp|Q64435|UD16_MOUSE UDP-glucuronosyltransferase 1-6 OS=Mus musculus GN=Ugt1a6 PE=1 SV=1	8.19	4.43	432.1	182552	2	2	1	5.08	531	22846
>sp|Q99N16|CP4F3_MOUSE Leukotriene-B(4) omega-hydroxylase 2 OS=Mus musculus GN=Cyp4f3 PE=2 SV=2	8.19	4.63	330.6	80509.3	4	3	0	6.49	524	4600
>sp|Q99L13|3HIDH_MOUSE 3-hydroxyisobutyrate dehydrogenase, mitochondrial OS=Mus musculus GN=Hibadh PE=2 SV=1	8.18	4.24	332	110623	4	2	0	8.66	335	42
>sp|P51660|DHB4_MOUSE Peroxisomal multifunctional enzyme type 2 OS=Mus musculus GN=Hsd17b4 PE=1 SV=3	8.18	4.77	375.6	240242	4	4	1	6.8	735	5618
>sp|Q9DCX2|ATP5H_MOUSE ATP synthase subunit d, mitochondrial OS=Mus musculus GN=Atp5h PE=1 SV=3	8.02	4.59	409.5	361484	4	4	0	28.57	161	1659
>sp|P54071|IDHP_MOUSE Isocitrate dehydrogenase [NADP], mitochondrial OS=Mus musculus GN=Idh2 PE=1 SV=3	7.9	3.92	263.7	372773	7	5	0	11.5	452	9778
>sp|Q60932|VDAC1_MOUSE Voltage-dependent anion-selective channel protein 1 OS=Mus musculus GN=Vdac1 PE=1 SV=3	7.76	3.83	261.4	126231	3	3	0	10.81	296	23091
>sp|Q60932-2|VDAC1_MOUSE Isoform Mt-VDAC1 of Voltage-dependent anion-selective channel protein 1 OS=Mus musculus GN=Vdac1
>sp|Q91WN4|KMO_MOUSE Kynurenine 3-monooxygenase OS=Mus musculus GN=Kmo PE=1 SV=1	7.6	4.57	360.2	280590	3	3	0	5.85	479	11214
>sp|Q91WN4-2|KMO_MOUSE Isoform 2 of Kynurenine 3-monooxygenase OS=Mus musculus GN=Kmo
>sp|Q8BWQ1|UD2A3_MOUSE UDP-glucuronosyltransferase 2A3 OS=Mus musculus GN=Ugt2a3 PE=2 SV=1	7.49	3.55	382.2	509248	6	5	0	8.24	534	22851
>sp|Q8R4H7|NAGS_MOUSE N-acetylglutamate synthase, mitochondrial OS=Mus musculus GN=Nags PE=1 SV=2	7.39	3.42	260.1	170952	4	4	0	7.02	527	13599
>sp|Q8R4H7-2|NAGS_MOUSE Isoform 2 of N-acetylglutamate synthase, mitochondrial OS=Mus musculus GN=Nags
>sp|P10922|H10_MOUSE Histone H1.0 OS=Mus musculus GN=H1f0 PE=2 SV=4	7.27	4.32	294.2	233622	6	5	1	12.37	194	8945
>sp|Q05816|FABP5_MOUSE Fatty acid-binding protein, epidermal OS=Mus musculus GN=Fabp5 PE=1 SV=3	7.19	4.47	353.8	194684	2	2	0	7.41	135	7259
>sp|P21107-2|TPM3_MOUSE Isoform 2 of Tropomyosin alpha-3 chain OS=Mus musculus GN=Tpm3	7.18	4.39	276.5	1.01794e+06	5	4	0	22.58	248	22014
>sp|Q9JHI5|IVD_MOUSE Isovaleryl-CoA dehydrogenase, mitochondrial OS=Mus musculus GN=Ivd PE=1 SV=1	7.16	3.59	371.1	361112	5	4	1	13.21	424	10421
>sp|P62204|CALM_MOUSE Calmodulin OS=Mus musculus GN=Calm1 PE=1 SV=2	7.05	2.59	334.5	678887	8	5	1	34.23	149	2529
>sp|P24452|CAPG_MOUSE Macrophage-capping protein OS=Mus musculus GN=Capg PE=1 SV=2	7.04	4.64	362	235498	3	3	1	7.39	352	2573
>sp|Q91XE0|GLYAT_MOUSE Glycine N-acyltransferase OS=Mus musculus GN=Glyat PE=1 SV=1	7.01	5.23	223.1	60998.1	3	2	0	7.77	296	8424
>sp|Q91XE0-2|GLYAT_MOUSE Isoform 2 of Glycine N-acyltransferase OS=Mus musculus GN=Glyat
>sp|Q9JHR7|IDE_MOUSE Insulin-degrading enzyme OS=Mus musculus GN=Ide PE=1 SV=1	7	4.18	392.2	194400	2	2	1	0.88	1019	9772
>sp|Q9DCU9|HOGA1_MOUSE Probable 4-hydroxy-2-oxoglutarate aldolase, mitochondrial OS=Mus musculus GN=Hoga1 PE=1 SV=1	6.94	3.69	281.6	270644	3	2	0	7.79	321	9394
>sp|O35490|BHMT1_MOUSE Betaine--homocysteine S-methyltransferase 1 OS=Mus musculus GN=Bhmt PE=2 SV=1	6.9	4.83	362.5	272822	3	3	0	6.63	407	2008
>sp|Q9D379|HYEP_MOUSE Epoxide hydrolase 1 OS=Mus musculus GN=Ephx1 PE=1 SV=2	6.82	4.96	334.5	300470	6	6	0	11.43	455	9667
>sp|Q8JZN5|ACAD9_MOUSE Acyl-CoA dehydrogenase family member 9, mitochondrial OS=Mus musculus GN=Acad9 PE=2 SV=2	6.81	4.82	368.4	158856	4	2	0	4.16	625	257
>sp|Q99MD6|TRXR3_MOUSE Thioredoxin reductase 3 (Fragment) OS=Mus musculus GN=Txnrd3 PE=1 SV=2	6.79	3.11	302.2	203972	3	3	0	4.3	697	22304
>sp|P50136|ODBA_MOUSE 2-oxoisovalerate dehydrogenase subunit alpha, mitochondrial OS=Mus musculus GN=Bckdha PE=1 SV=1	6.77	6.74	358.5	223459	4	2	0	6.11	442	14651
>sp|P25911|LYN_MOUSE Tyrosine-protein kinase Lyn OS=Mus musculus GN=Lyn PE=1 SV=4	6.75	5.12	224.7	40155.3	2	2	0	5.47	512	12091
>sp|P25911-2|LYN_MOUSE Isoform 2 of Tyrosine-protein kinase Lyn OS=Mus musculus GN=Lyn
>sp|P70158|ASM3A_MOUSE Acid sphingomyelinase-like phosphodiesterase 3a OS=Mus musculus GN=Smpdl3a PE=2 SV=2	6.73	4.76	269.3	184194	3	3	0	8.54	445	1495
>sp|P00687|AMY1_MOUSE Alpha-amylase 1 OS=Mus musculus GN=Amy1 PE=1 SV=2	6.67	6.72	295.4	53640.9	1	1	0	3.72	511	875
>sp|Q9JMA7|CP341_MOUSE Cytochrome P450 3A41 OS=Mus musculus GN=Cyp3a41a PE=2 SV=2	6.36	4.53	414	413189	4	4	1	8.73	504	4589
>sp|Q64459|CP3AB_MOUSE Cytochrome P450 3A11 OS=Mus musculus GN=Cyp3a11 PE=1 SV=1
>sp|Q99LC3|NDUAA_MOUSE NADH dehydrogenase [ubiquinone] 1 alpha subcomplex subunit 10, mitochondrial OS=Mus musculus GN=Ndufa10 PE=1 SV=1	6.32	3.95	314.3	251641	3	3	0	9.3	355	13805
>sp|P24549|AL1A1_MOUSE Retinal dehydrogenase 1 OS=Mus musculus GN=Aldh1a1 PE=1 SV=5	6.25	3.09	300.4	283876	7	5	1	12.77	501	750
>sp|P42125|ECI1_MOUSE Enoyl-CoA delta isomerase 1, mitochondrial OS=Mus musculus GN=Eci1 PE=2 SV=1	6.24	5.59	275.8	111243	2	2	0	7.96	289	6304
>sp|O08601|MTP_MOUSE Microsomal triglyceride transfer protein large subunit OS=Mus musculus GN=Mttp PE=2 SV=2	6.04	4.96	327.7	70421.5	3	3	0	4.14	894	13326
>sp|O08601-2|MTP_MOUSE Isoform 2 of Microsomal triglyceride transfer protein large subunit OS=Mus musculus GN=Mttp
>sp|Q91W43|GCSP_MOUSE Glycine dehydrogenase [decarboxylating], mitochondrial OS=Mus musculus GN=Gldc PE=1 SV=1	5.92	3.55	290.9	187786	4	4	0	4.49	1025	8193
>sp|Q9D0M3|CY1_MOUSE Cytochrome c1, heme protein, mitochondrial OS=Mus musculus GN=Cyc1 PE=1 SV=1	5.83	2.97	307.1	158036	3	3	1	10.77	325	5189
>sp|Q9D0M3-2|CY1_MOUSE Isoform 2 of Cytochrome c1, heme protein, mitochondrial OS=Mus musculus GN=Cyc1
>sp|P63101|1433Z_MOUSE 14-3-3 protein zeta/delta OS=Mus musculus GN=Ywhaz PE=1 SV=1	5.81	5.76	402	252396	5	3	1	10.2	245	9
>sp|Q61696|HS71A_MOUSE Heat shock 70 kDa protein 1A OS=Mus musculus GN=Hspa1a PE=1 SV=2	5.81	4.97	462.9	211426	3	3	0	4.84	641	9470
>sp|P17879|HS71B_MOUSE Heat shock 70 kDa protein 1B OS=Mus musculus GN=Hspa1b PE=1 SV=3
>sp|P00405|COX2_MOUSE Cytochrome c oxidase subunit 2 OS=Mus musculus GN=Mtco2 PE=1 SV=1	5.8	4.74	321.4	302302	2	2	1	7.49	227	4494
>sp|O88487|DC1I2_MOUSE Cytoplasmic dynein 1 intermediate chain 2 OS=Mus musculus GN=Dync1i2 PE=2 SV=1	5.76	4.94	189.7	38044	2	2	0	3.59	612	5325
>sp|P08113|ENPL_MOUSE Endoplasmin OS=Mus musculus GN=Hsp90b1 PE=1 SV=2	5.73	5.79	389.1	49576.3	1	1	0	1.75	802	6598
>sp|P57780|ACTN4_MOUSE Alpha-actinin-4 OS=Mus musculus GN=Actn4 PE=1 SV=1	5.69	4.22	271.5	361532	6	5	0	6.03	912	409
>sp|P09103|PDIA1_MOUSE Protein disulfide-isomerase OS=Mus musculus GN=P4hb PE=1 SV=2	5.69	5.31	245.7	336172	5	5	0	10.41	509	15379
>sp|P18760|COF1_MOUSE Cofilin-1 OS=Mus musculus GN=Cfl1 PE=1 SV=3	5.68	4.85	445.6	460596	3	3	0	21.08	166	4400
>sp|Q9CY58|PAIRB_MOUSE Plasminogen activator inhibitor 1 RNA-binding protein OS=Mus musculus GN=Serbp1 PE=1 SV=2	5.65	5.68	262.7	23211.4	1	1	0	3.93	407	15077
>sp|Q9CY58-2|PAIRB_MOUSE Isoform 2 of Plasminogen activator inhibitor 1 RNA-binding protein OS=Mus musculus GN=Serbp1
>sp|Q9CY58-3|PAIRB_MOUSE Isoform 3 of Plasminogen activator inhibitor 1 RNA-binding protein OS=Mus musculus GN=Serbp1
>sp|Q9CY58-4|PAIRB_MOUSE Isoform 4 of Plasminogen activator inhibitor 1 RNA-binding protein OS=Mus musculus GN=Serbp1
>sp|O35639|ANXA3_MOUSE Annexin A3 OS=Mus musculus GN=Anxa3 PE=1 SV=4	5.54	5.57	378.4	44287.8	1	1	0	4.64	323	1064
>sp|P12787|COX5A_MOUSE Cytochrome c oxidase subunit 5A, mitochondrial OS=Mus musculus GN=Cox5a PE=1 SV=2	5.54	5.55	254.2	11354.8	1	1	0	10.27	146	4498
>sp|P26040|EZRI_MOUSE Ezrin OS=Mus musculus GN=Ezr PE=1 SV=3	5.49	2.08	268.8	589427	7	7	1	10.24	586	6893
>sp|Q7TMM9|TBB2A_MOUSE Tubulin beta-2A chain OS=Mus musculus GN=Tubb2a PE=1 SV=1	5.41	5.45	247.5	17357.2	1	1	0	3.37	445	20906
>sp|Q9CWF2|TBB2B_MOUSE Tubulin beta-2B chain OS=Mus musculus GN=Tubb2b PE=1 SV=1
>sp|Q9ERD7|TBB3_MOUSE Tubulin beta-3 chain OS=Mus musculus GN=Tubb3 PE=1 SV=1
>sp|P99024|TBB5_MOUSE Tubulin beta-5 chain OS=Mus musculus GN=Tubb5 PE=1 SV=1
>sp|P19221|THRB_MOUSE Prothrombin OS=Mus musculus GN=F2 PE=1 SV=1	5.33	2.69	264.2	605547	5	5	0	7.28	618	21342
>sp|Q02257|PLAK_MOUSE Junction plakoglobin OS=Mus musculus GN=Jup PE=1 SV=3	5.28	2.95	277.6	382668	5	5	0	6.31	745	15915
>sp|Q99JY0|ECHB_MOUSE Trifunctional enzyme subunit beta, mitochondrial OS=Mus musculus GN=Hadhb PE=1 SV=1	5.28	4.28	262.8	141906	2	2	0	5.05	475	6295
>sp|P09671|SODM_MOUSE Superoxide dismutase [Mn], mitochondrial OS=Mus musculus GN=Sod2 PE=1 SV=3	5.25	5.26	259.1	49293.8	1	1	0	6.31	222	19778
>sp|Q8K0C4|CP51A_MOUSE Lanosterol 14-alpha demethylase OS=Mus musculus GN=Cyp51a1 PE=2 SV=1	5.23	2.72	193.9	74526.1	3	3	0	6.36	503	4603
>sp|P19783|COX41_MOUSE Cytochrome c oxidase subunit 4 isoform 1, mitochondrial OS=Mus musculus GN=Cox4i1 PE=1 SV=2	5.22	3.14	273.8	144486	2	2	0	11.83	169	4496
>sp|P17742|PPIA_MOUSE Peptidyl-prolyl cis-trans isomerase A OS=Mus musculus GN=Ppia PE=1 SV=2	5.19	4.17	286.2	231054	5	2	0	14.02	164	16262
>sp|Q8CI43|MYL6B_MOUSE Myosin light chain 6B OS=Mus musculus GN=Myl6b PE=2 SV=1	5.17	4.71	268.6	129647	3	3	1	16.43	207	13461
>sp|Q9WU79|PROD_MOUSE Proline dehydrogenase 1, mitochondrial OS=Mus musculus GN=Prodh PE=2 SV=2	5.14	2.73	247.9	160672	5	5	2	4.84	599	16488
>sp|O55137|ACOT1_MOUSE Acyl-coenzyme A thioesterase 1 OS=Mus musculus GN=Acot1 PE=1 SV=1	5.12	4.68	295.2	65130.2	2	2	0	5.49	419	351
>sp|P61979-2|HNRPK_MOUSE Isoform 2 of Heterogeneous nuclear ribonucleoprotein K OS=Mus musculus GN=Hnrnpk	5.03	3.09	335.6	129250	3	3	0	5.17	464	9386
>sp|P97501|FMO3_MOUSE Dimethylaniline monooxygenase [N-oxide-forming] 3 OS=Mus musculus GN=Fmo3 PE=1 SV=1	4.96	5	327.1	110808	2	2	0	4.12	534	7691
>sp|Q9CQS8|SC61B_MOUSE Protein transport protein Sec61 subunit beta OS=Mus musculus GN=Sec61b PE=1 SV=3	4.95	4.96	233.3	66771.7	1	1	0	15.62	96	18767
>sp|Q5I1X5|IASPP_MOUSE RelA-associated inhibitor OS=Mus musculus GN=Ppp1r13l PE=1 SV=1	4.91	4.96	394.7	199699	2	1	0	1.58	824	9725
>sp|Q8VD31|TPSNR_MOUSE Tapasin-related protein OS=Mus musculus GN=Tapbpl PE=2 SV=2	4.89	4.91	351.5	111230	2	1	0	2.44	451	22041
>sp|O35405|PLD3_MOUSE Phospholipase D3 OS=Mus musculus GN=Pld3 PE=2 SV=1	4.88	3.25	260	137794	2	2	0	4.3	488	15966
>sp|O54782|MA2B2_MOUSE Epididymis-specific alpha-mannosidase OS=Mus musculus GN=Man2b2 PE=2 SV=2	4.84	4.93	329.9	39544.2	1	1	0	1.18	1018	12187
>sp|A2ATU0|DHTK1_MOUSE Probable 2-oxoglutarate dehydrogenase E1 component DHKTD1, mitochondrial OS=Mus musculus GN=Dhtkd1 PE=2 SV=1	4.81	2.47	161.9	187143	3	3	0	3.8	921	5647
>sp|Q9CW42|MOSC1_MOUSE MOSC domain-containing protein 1, mitochondrial OS=Mus musculus GN=Marc1 PE=1 SV=2	4.8	4.83	408.5	62025.3	1	1	0	3.53	340	13042
>sp|P70290|EM55_MOUSE 55 kDa erythrocyte membrane protein OS=Mus musculus GN=Mpp1 PE=1 SV=1	4.8	4.83	262.7	20138.8	1	1	0	2.58	466	6533
>sp|Q8JZR0|ACSL5_MOUSE Long-chain-fatty-acid--CoA ligase 5 OS=Mus musculus GN=Acsl5 PE=2 SV=1	4.79	4.78	280.2	113042	2	2	1	3.81	683	383
>sp|Q9WUM5|SUCA_MOUSE Succinyl-CoA ligase [ADP/GDP-forming] subunit alpha, mitochondrial OS=Mus musculus GN=Suclg1 PE=1 SV=4	4.79	4.82	227.8	22775.6	1	1	0	4.62	346	20451
>sp|Q60649|CLPB_MOUSE Caseinolytic peptidase B protein homolog OS=Mus musculus GN=Clpb PE=1 SV=1	4.78	2.44	289.3	73077.6	2	2	0	3.4	677	4104
>sp|Q8CIM7|CP2DQ_MOUSE Cytochrome P450 2D26 OS=Mus musculus GN=Cyp2d26 PE=1 SV=1	4.77	4.75	260.2	72817.2	3	2	0	4.8	500	4579
>sp|P56135|ATPK_MOUSE ATP synthase subunit f, mitochondrial OS=Mus musculus GN=Atp5j2 PE=1 SV=3	4.74	4.75	260.6	37745.2	1	1	0	13.64	88	1677
>sp|P17897|LYZ1_MOUSE Lysozyme C-1 OS=Mus musculus GN=Lyz1 PE=1 SV=1	4.71	4.72	358.6	54741.6	1	1	0	8.11	148	12119
>sp|P09411|PGK1_MOUSE Phosphoglycerate kinase 1 OS=Mus musculus GN=Pgk1 PE=1 SV=4	4.69	2.57	221.4	230974	2	2	0	5.76	417	15558
>sp|P09041|PGK2_MOUSE Phosphoglycerate kinase 2 OS=Mus musculus GN=Pgk2 PE=1 SV=4
>sp|Q9CQH3|NDUB5_MOUSE NADH dehydrogenase [ubiquinone] 1 beta subcomplex subunit 5, mitochondrial OS=Mus musculus GN=Ndufb5 PE=1 SV=1	4.69	4.7	370.8	48518.5	1	1	0	5.82	189	13812
>sp|Q9DD20|MET7B_MOUSE Methyltransferase-like protein 7B OS=Mus musculus GN=Mettl7b PE=2 SV=2	4.69	4.71	284.4	44736.8	1	1	0	4.92	244	12651
>sp|Q9D880|TIM50_MOUSE Mitochondrial import inner membrane translocase subunit TIM50 OS=Mus musculus GN=Timm50 PE=1 SV=1	4.65	4.68	285.8	61664	1	1	0	3.12	353	21402
>sp|P97351|RS3A_MOUSE 40S ribosomal protein S3a OS=Mus musculus GN=Rps3a PE=1 SV=3	4.63	3.22	313.7	230404	3	3	1	10.61	264	18186
>sp|Q9Z0M5|LICH_MOUSE Lysosomal acid lipase/cholesteryl ester hydrolase OS=Mus musculus GN=Lipa PE=2 SV=2	4.61	4.62	272.4	175930	2	1	0	2.77	397	11635
>sp|Q9CZY3|UB2V1_MOUSE Ubiquitin-conjugating enzyme E2 variant 1 OS=Mus musculus GN=Ube2v1 PE=1 SV=1	4.54	3.69	348.7	154464	2	2	0	14.97	147	22651
>sp|Q9CZY3-2|UB2V1_MOUSE Isoform 2 of Ubiquitin-conjugating enzyme E2 variant 1 OS=Mus musculus GN=Ube2v1
>sp|Q60930|VDAC2_MOUSE Voltage-dependent anion-selective channel protein 2 OS=Mus musculus GN=Vdac2 PE=1 SV=2	4.53	4.29	305.8	90856.6	2	2	0	6.1	295	23093
>sp|O09159|MA2B1_MOUSE Lysosomal alpha-mannosidase OS=Mus musculus GN=Man2b1 PE=2 SV=4	4.46	4.49	269.7	96947.6	3	2	1	1.78	1013	12186
>sp|Q61425|HCDH_MOUSE Hydroxyacyl-coenzyme A dehydrogenase, mitochondrial OS=Mus musculus GN=Hadh PE=1 SV=2	4.44	4.47	251.6	36578.7	1	1	0	3.18	314	9109
>sp|Q6IFZ6|K2C1B_MOUSE Keratin, type II cytoskeletal 1b OS=Mus musculus GN=Krt77 PE=1 SV=1	4.44	4.47	376.6	252048	2	1	0	1.57	572	10700
>sp|P50247|SAHH_MOUSE Adenosylhomocysteinase OS=Mus musculus GN=Ahcy PE=1 SV=3	4.4	4.43	256.3	323160	3	3	1	6.71	432	18666
>sp|P99027|RLA2_MOUSE 60S acidic ribosomal protein P2 OS=Mus musculus GN=Rplp2 PE=1 SV=3	4.35	4.31	371.6	125315	2	2	0	42.61	115	17753
>sp|P50580|PA2G4_MOUSE Proliferation-associated protein 2G4 OS=Mus musculus GN=Pa2g4 PE=1 SV=3	4.25	4.28	269.1	173667	2	2	0	4.82	394	15029
>sp|Q8BHN3|GANAB_MOUSE Neutral alpha-glucosidase AB OS=Mus musculus GN=Ganab PE=1 SV=1	4.21	3.81	240.8	172820	2	2	0	1.91	944	8060
>sp|Q8BHN3-2|GANAB_MOUSE Isoform 2 of Neutral alpha-glucosidase AB OS=Mus musculus GN=Ganab
>sp|Q8BHN3-3|GANAB_MOUSE Isoform 3 of Neutral alpha-glucosidase AB OS=Mus musculus GN=Ganab
>sp|O08756|HCD2_MOUSE 3-hydroxyacyl-CoA dehydrogenase type-2 OS=Mus musculus GN=Hsd17b10 PE=1 SV=4	4.19	3.76	201.5	74602.5	2	2	0	9.2	261	9108
>sp|Q3UV17|K22O_MOUSE Keratin, type II cytoskeletal 2 oral OS=Mus musculus GN=Krt76 PE=2 SV=1	4.18	4.2	350.3	1152283	2	1	0	1.85	594	10699
>sp|P17182|ENOA_MOUSE Alpha-enolase OS=Mus musculus GN=Eno1 PE=1 SV=3	4.17	3.37	276.3	326422	2	2	0	4.61	434	6588
>sp|P14733|LMNB1_MOUSE Lamin-B1 OS=Mus musculus GN=Lmnb1 PE=1 SV=3	4.15	4.2	285.6	70504.7	1	1	0	1.7	588	11753
>sp|P26231|CTNA1_MOUSE Catenin alpha-1 OS=Mus musculus GN=Ctnna1 PE=1 SV=1	4.14	2.19	202.7	176853	3	3	0	4.53	906	5026
>sp|O35728|CP4AE_MOUSE Cytochrome P450 4A14 OS=Mus musculus GN=Cyp4a14 PE=2 SV=1	4.13	4.15	247.6	45424.1	2	1	0	2.17	507	4597
>sp|Q8JZZ0|UD3A2_MOUSE UDP-glucuronosyltransferase 3A2 OS=Mus musculus GN=Ugt3a2 PE=2 SV=2	4.12	4.17	398.2	128917	1	1	0	1.72	523	22853
>sp|P26350|PTMA_MOUSE Prothymosin alpha OS=Mus musculus GN=Ptma PE=1 SV=2	4	4.01	229.5	24354.3	1	1	0	15.32	111	16736
>sp|P24456|CP2DA_MOUSE Cytochrome P450 2D10 OS=Mus musculus GN=Cyp2d10 PE=2 SV=2	3.92	3.95	238.5	77344.8	2	1	0	2.18	504	4577
>sp|O54734|OST48_MOUSE Dolichyl-diphosphooligosaccharide--protein glycosyltransferase 48 kDa subunit OS=Mus musculus GN=Ddost PE=1 SV=2	3.91	3.86	261.1	149456	3	3	0	5.44	441	14863
>sp|P62259|1433E_MOUSE 14-3-3 protein epsilon OS=Mus musculus GN=Ywhae PE=1 SV=1	3.87	3.73	272.9	115550	3	2	1	9.02	255	3
>sp|P14602|HSPB1_MOUSE Heat shock protein beta-1 OS=Mus musculus GN=Hspb1 PE=1 SV=3	3.83	3.85	350.3	134018	1	1	0	4.78	209	9501
>sp|P14602-2|HSPB1_MOUSE Isoform B of Heat shock protein beta-1 OS=Mus musculus GN=Hspb1
>sp|P14602-3|HSPB1_MOUSE Isoform C of Heat shock protein beta-1 OS=Mus musculus GN=Hspb1
>sp|P97371|PSME1_MOUSE Proteasome activator complex subunit 1 OS=Mus musculus GN=Psme1 PE=2 SV=2	3.82	3.81	223.2	144110	3	2	1	8.84	249	16669
>sp|Q61656|DDX5_MOUSE Probable ATP-dependent RNA helicase DDX5 OS=Mus musculus GN=Ddx5 PE=1 SV=2	3.8	3.84	262.9	103106	3	2	0	3.42	614	5468
>sp|P60766|CDC42_MOUSE Cell division control protein 42 homolog OS=Mus musculus GN=Cdc42 PE=1 SV=2	3.76	2.18	181.3	396977	4	3	1	6.81	191	3248
>sp|P60766-1|CDC42_MOUSE Isoform 1 of Cell division control protein 42 homolog OS=Mus musculus GN=Cdc42
>sp|P97872|FMO5_MOUSE Dimethylaniline monooxygenase [N-oxide-forming] 5 OS=Mus musculus GN=Fmo5 PE=2 SV=4	3.71	3.75	279.6	55002.5	1	1	0	1.69	533	7693
>sp|P63017|HSP7C_MOUSE Heat shock cognate 71 kDa protein OS=Mus musculus GN=Hspa8 PE=1 SV=1	3.67	2.41	186.1	488849	4	3	0	6.04	646	9498
>sp|P11499|HS90B_MOUSE Heat shock protein HSP 90-beta OS=Mus musculus GN=Hsp90ab1 PE=1 SV=3	3.65	3.12	117.4	90252.7	2	2	0	5.66	724	9476
>sp|Q9DBJ1|PGAM1_MOUSE Phosphoglycerate mutase 1 OS=Mus musculus GN=Pgam1 PE=1 SV=3	3.55	3.56	329.8	197655	3	3	1	9.84	254	15533
>sp|P58871|TB182_MOUSE 182 kDa tankyrase-1-binding protein OS=Mus musculus GN=Tnks1bp1 PE=1 SV=2	3.54	3.66	184.1	54327.5	3	2	1	1.16	1720	20895
>sp|Q8BJ64|CHDH_MOUSE Choline dehydrogenase, mitochondrial OS=Mus musculus GN=Chdh PE=1 SV=1	3.52	2.75	261.8	95827.7	2	2	0	3.52	596	3672
>sp|P52480|KPYM_MOUSE Pyruvate kinase isozymes M1/M2 OS=Mus musculus GN=Pkm2 PE=1 SV=4	3.51	3.55	277.4	57395.2	1	1	0	2.07	531	11244
>sp|P52480-2|KPYM_MOUSE Isoform M1 of Pyruvate kinase isozymes M1/M2 OS=Mus musculus GN=Pkm2
>sp|P53657|KPYR_MOUSE Pyruvate kinase isozymes R/L OS=Mus musculus GN=Pklr PE=2 SV=1
>sp|Q99J39|DCMC_MOUSE Malonyl-CoA decarboxylase, mitochondrial OS=Mus musculus GN=Mlycd PE=2 SV=1	3.51	3.55	266.8	54639.4	1	1	0	2.24	492	5374
>sp|Q99J39-2|DCMC_MOUSE Isoform Cytoplasmic+peroxisomal of Malonyl-CoA decarboxylase, mitochondrial OS=Mus musculus GN=Mlycd
>sp|P58710|GGLO_MOUSE L-gulonolactone oxidase OS=Mus musculus GN=Gulo PE=1 SV=3	3.47	1.86	271.3	162919	3	3	1	6.59	440	8278
>sp|P70296|PEBP1_MOUSE Phosphatidylethanolamine-binding protein 1 OS=Mus musculus GN=Pebp1 PE=1 SV=3	3.44	3.45	151.4	15276.5	1	1	0	7.49	187	15445
>sp|P49312|ROA1_MOUSE Heterogeneous nuclear ribonucleoprotein A1 OS=Mus musculus GN=Hnrnpa1 PE=1 SV=2	3.43	3.4	271.8	155746	2	2	0	6.25	320	17974
>sp|P49312-2|ROA1_MOUSE Isoform Short of Heterogeneous nuclear ribonucleoprotein A1 OS=Mus musculus GN=Hnrnpa1
>sp|P01867|IGG2B_MOUSE Ig gamma-2B chain C region OS=Mus musculus GN=Igh-3 PE=1 SV=3	3.4	1.38	240	227239	4	4	0	10.64	404	9911
>sp|P01867-2|IGG2B_MOUSE Isoform 2 of Ig gamma-2B chain C region OS=Mus musculus GN=Igh-3
>sp|Q9DBH5|LMAN2_MOUSE Vesicular integral-membrane protein VIP36 OS=Mus musculus GN=Lman2 PE=2 SV=2	3.4	3.43	232.4	36333.5	1	1	0	3.07	358	11723
>sp|P53395|ODB2_MOUSE Lipoamide acyltransferase component of branched-chain alpha-keto acid dehydrogenase complex, mitochondrial OS=Mus musculus GN=Dbt PE=2 SV=2	3.37	3.37	331.4	142469	2	2	1	4.15	482	14650
>sp|Q9DCN1-2|NUD12_MOUSE Isoform 2 of Peroxisomal NADH pyrophosphatase NUDT12 OS=Mus musculus GN=Nudt12	3.34	3.37	257.3	121902	1	1	0	2.72	367	14523
>sp|Q9D3R5|F187A_MOUSE Ig-like V-type domain-containing protein FAM187A OS=Mus musculus GN=Fam187a PE=2 SV=1	3.3	3.29	288.7	232459	3	1	0	1.44	417	7066
>sp|Q91VS7|MGST1_MOUSE Microsomal glutathione S-transferase 1 OS=Mus musculus GN=Mgst1 PE=1 SV=3	3.3	3.31	222.3	54968.6	1	1	0	8.39	155	12748
>sp|P00184|CP1A1_MOUSE Cytochrome P450 1A1 OS=Mus musculus GN=Cyp1a1 PE=1 SV=2	3.26	3.3	136.5	16719.6	1	1	0	3.05	524	4551
>sp|Q91ZJ5|UGPA_MOUSE UTP--glucose-1-phosphate uridylyltransferase OS=Mus musculus GN=Ugp2 PE=2 SV=3	3.24	3.28	270.8	75877.6	1	1	0	1.77	508	22874
>sp|Q91ZJ5-2|UGPA_MOUSE Isoform 2 of UTP--glucose-1-phosphate uridylyltransferase OS=Mus musculus GN=Ugp2
>sp|Q62393|TPD52_MOUSE Tumor protein D52 OS=Mus musculus GN=Tpd52 PE=1 SV=2	3.23	3.23	228.2	89996.6	2	1	0	4.91	224	21996
>sp|Q62393-2|TPD52_MOUSE Isoform 2 of Tumor protein D52 OS=Mus musculus GN=Tpd52
>sp|Q62393-3|TPD52_MOUSE Isoform 3 of Tumor protein D52 OS=Mus musculus GN=Tpd52
>sp|ALBU_HUMAN|(Common contaminant protein)	3.19	3.14	296.7	199474	2	2	0	3.78	609	24194
>sp|P62242|RS8_MOUSE 40S ribosomal protein S8 OS=Mus musculus GN=Rps8 PE=1 SV=2	3.19	3.2	226.3	54741.4	1	1	0	6.25	208	18192
>Reverse >sp|P14873|MAP1B_MOUSE Microtubule-associated protein 1B OS=Mus musculus GN=Map1b PE=1 SV=2	3.1	3.01	297.9	241848	3	3	2	2.03	2464	36511
>sp|Q9DCW4|ETFB_MOUSE Electron transfer flavoprotein subunit beta OS=Mus musculus GN=Etfb PE=1 SV=3	3.1	2.71	226.5	71380.1	2	2	0	7.84	255	6820
>sp|Q3UFQ8|LR16B_MOUSE Leucine-rich repeat-containing protein 16B OS=Mus musculus GN=Lrrc16b PE=2 SV=2	3.02	3.11	295.5	448373	4	3	1	1.89	1375	11846
>sp|Q6PDM2|SRSF1_MOUSE Serine/arginine-rich splicing factor 1 OS=Mus musculus GN=Srsf1 PE=1 SV=3	3.01	3.03	221.7	40076	1	1	0	4.03	248	20190
>sp|Q91YT0|NDUV1_MOUSE NADH dehydrogenase [ubiquinone] flavoprotein 1, mitochondrial OS=Mus musculus GN=Ndufv1 PE=1 SV=1	3	2.89	278.2	252508	3	2	0	4.31	464	13831
>sp|Q9DCF1|TMM25_MOUSE Transmembrane protein 25 OS=Mus musculus GN=Tmem25 PE=2 SV=1	2.97	3	306.2	55557.3	1	1	0	2.47	365	21733
>sp|Q9DCF1-2|TMM25_MOUSE Isoform 2 of Transmembrane protein 25 OS=Mus musculus GN=Tmem25
>sp|Q60759|GCDH_MOUSE Glutaryl-CoA dehydrogenase, mitochondrial OS=Mus musculus GN=Gcdh PE=2 SV=2	2.96	2.6	242.8	349949	4	4	0	7.99	438	8163
>sp|Q99J99|THTM_MOUSE 3-mercaptopyruvate sulfurtransferase OS=Mus musculus GN=Mpst PE=1 SV=3	2.87	2.67	92.2	128705	2	2	0	10.1	297	21349
>sp|Q8R164|BPHL_MOUSE Valacyclovir hydrolase OS=Mus musculus GN=Bphl PE=2 SV=1	2.83	2.83	164	29953.5	2	1	0	4.47	291	2117
>sp|Q80XN0|BDH_MOUSE D-beta-hydroxybutyrate dehydrogenase, mitochondrial OS=Mus musculus GN=Bdh1 PE=1 SV=2	2.79	2.75	192.2	54569	2	2	1	6.71	343	1962
>sp|O08605|MKNK1_MOUSE MAP kinase-interacting serine/threonine-protein kinase 1 OS=Mus musculus GN=Mknk1 PE=1 SV=2	2.75	2.79	43.9	11920.4	1	1	1	4.68	427	12879
>sp|Q6IFX2|K1C42_MOUSE Keratin, type I cytoskeletal 42 OS=Mus musculus GN=Krt42 PE=1 SV=1	2.7	2.7	225.9	130362	2	2	0	3.98	452	10682
>sp|Q60597-2|ODO1_MOUSE Isoform 2 of 2-oxoglutarate dehydrogenase, mitochondrial OS=Mus musculus GN=Ogdh	2.7	1.41	196.1	284829	4	4	0	3.85	1013	14671
>sp|P55096|ABCD3_MOUSE ATP-binding cassette sub-family D member 3 OS=Mus musculus GN=Abcd3 PE=1 SV=2	2.68	2.69	157.4	216892	3	2	1	3.34	659	179
>sp|P63085|MK01_MOUSE Mitogen-activated protein kinase 1 OS=Mus musculus GN=Mapk1 PE=1 SV=3	2.63	2.66	234.5	62472.9	1	1	0	2.51	358	12848
>sp|Q8C5H8|NAKD1_MOUSE NAD kinase domain-containing protein 1 OS=Mus musculus GN=Nadkd1 PE=1 SV=2	2.62	2.65	140.3	55093.7	1	1	0	3.1	452	13605
>sp|Q8C5H8-2|NAKD1_MOUSE Isoform 2 of NAD kinase domain-containing protein 1 OS=Mus musculus GN=Nadkd1
>sp|Q8C5H8-3|NAKD1_MOUSE Isoform 3 of NAD kinase domain-containing protein 1 OS=Mus musculus GN=Nadkd1
>sp|Q8C5H8-4|NAKD1_MOUSE Isoform 4 of NAD kinase domain-containing protein 1 OS=Mus musculus GN=Nadkd1
>sp|O35459|ECH1_MOUSE Delta(3,5)-Delta(2,4)-dienoyl-CoA isomerase, mitochondrial OS=Mus musculus GN=Ech1 PE=2 SV=1	2.58	2.56	283.3	246025	3	1	0	2.75	327	6293
>sp|Q7TPD7|F211B_MOUSE Leucine-rich repeat-containing protein FAM211B OS=Mus musculus GN=Fam211b PE=2 SV=1	2.55	2.57	318.7	125709	1	1	0	2.29	306	7117
>sp|Q9CQV8|1433B_MOUSE 14-3-3 protein beta/alpha OS=Mus musculus GN=Ywhab PE=1 SV=3	2.53	1.32	246	143202	3	3	0	10.57	246	1
>sp|Q9DC53|CPNE8_MOUSE Copine-8 OS=Mus musculus GN=Cpne8 PE=2 SV=2	2.51	2.56	301.7	89972.2	1	1	0	1.42	564	4632
>sp|Q8K370|ACD10_MOUSE Acyl-CoA dehydrogenase family member 10 OS=Mus musculus GN=Acad10 PE=2 SV=1	2.49	1.21	131.6	73710.9	4	3	0	3.18	1069	284
>sp|Q99LJ1|FUCO_MOUSE Tissue alpha-L-fucosidase OS=Mus musculus GN=Fuca1 PE=2 SV=1	2.49	1.62	212.9	172980	3	3	0	5.75	452	7906
>sp|O55125|NIPS1_MOUSE Protein NipSnap homolog 1 OS=Mus musculus GN=Nipsnap1 PE=1 SV=1	2.48	2.49	263.3	169902	3	2	0	5.63	284	14065
>sp|P62900|RL31_MOUSE 60S ribosomal protein L31 OS=Mus musculus GN=Rpl31 PE=2 SV=1	2.43	1.18	232.5	252336	3	3	0	24.8	125	17726
>sp|Q9CQR2|RS21_MOUSE 40S ribosomal protein S21 OS=Mus musculus GN=Rps21 PE=2 SV=1	2.43	2.44	231.7	80353.9	1	1	0	12.05	83	18172
>sp|Q921H8|THIKA_MOUSE 3-ketoacyl-CoA thiolase A, peroxisomal OS=Mus musculus GN=Acaa1a PE=2 SV=1	2.41	2.45	100.4	9571.8	1	1	0	3.07	424	21317
>sp|Q8VCH0|THIKB_MOUSE 3-ketoacyl-CoA thiolase B, peroxisomal OS=Mus musculus GN=Acaa1b PE=2 SV=1
>sp|Q60936|ADCK3_MOUSE Chaperone activity of bc1 complex-like, mitochondrial OS=Mus musculus GN=Adck3 PE=2 SV=2	2.4	2.46	235.7	48474.3	1	1	0	1.55	645	505
>sp|Q60936-2|ADCK3_MOUSE Isoform 2 of Chaperone activity of bc1 complex-like, mitochondrial OS=Mus musculus GN=Adck3
>sp|O70305|ATX2_MOUSE Ataxin-2 OS=Mus musculus GN=Atxn2 PE=1 SV=1	2.4	2.51	241.7	104869	1	1	0	0.93	1285	1714
>sp|Q02248|CTNB1_MOUSE Catenin beta-1 OS=Mus musculus GN=Ctnnb1 PE=1 SV=1	2.39	1.61	280.5	237812	3	2	0	2.69	781	5031
>sp|Q6GSS7|H2A2A_MOUSE Histone H2A type 2-A OS=Mus musculus GN=Hist2h2aa1 PE=1 SV=3	2.37	2.36	244.2	166207	2	1	0	8.46	130	8961
>sp|Q64523|H2A2C_MOUSE Histone H2A type 2-C OS=Mus musculus GN=Hist2h2ac PE=1 SV=3
>sp|Q62167|DDX3X_MOUSE ATP-dependent RNA helicase DDX3X OS=Mus musculus GN=Ddx3x PE=1 SV=3	2.36	2.39	172.6	89564.1	2	2	0	3.17	662	5446
>sp|Q02819|NUCB1_MOUSE Nucleobindin-1 OS=Mus musculus GN=Nucb1 PE=1 SV=2	2.33	1.53	237.3	107329	2	2	0	4.79	459	14515
>sp|Q80TE0|RPAP1_MOUSE RNA polymerase II-associated protein 1 OS=Mus musculus GN=Rpap1 PE=1 SV=2	2.27	2.39	244	66329.6	1	1	0	0.71	1409	18033
>sp|Q9QYA2|TOM40_MOUSE Mitochondrial import receptor subunit TOM40 homolog OS=Mus musculus GN=Tomm40 PE=1 SV=3	2.26	2.29	261.8	50446.1	1	1	0	3.05	361	21939
>Reverse >sp|O35551|RABE1_MOUSE Rab GTPase-binding effector protein 1 OS=Mus musculus GN=Rabep1 PE=1 SV=2	2.25	2.26	281.6	375400	3	3	1	2.2	862	41226
>Reverse >sp|O35551-2|RABE1_MOUSE Isoform 2 of Rab GTPase-binding effector protein 1 OS=Mus musculus GN=Rabep1
>Reverse >sp|O35551-3|RABE1_MOUSE Isoform 3 of Rab GTPase-binding effector protein 1 OS=Mus musculus GN=Rabep1
>Reverse >sp|O35551-6|RABE1_MOUSE Isoform 6 of Rab GTPase-binding effector protein 1 OS=Mus musculus GN=Rabep1
>sp|Q571E4|GALNS_MOUSE N-acetylgalactosamine-6-sulfatase OS=Mus musculus GN=Galns PE=2 SV=2	2.25	1.46	240.1	138891	2	2	0	3.27	520	8041
>Reverse >sp|O54826|AF10_MOUSE Protein AF-10 OS=Mus musculus GN=Mllt10 PE=1 SV=2	2.23	2.32	276.2	164372	1	1	0	0.84	1068	24809
>sp|Q9CQF9|PCYOX_MOUSE Prenylcysteine oxidase OS=Mus musculus GN=Pcyox1 PE=1 SV=1	2.21	0.88	166.5	258377	3	3	1	8.91	505	15316
>sp|Q60605|MYL6_MOUSE Myosin light polypeptide 6 OS=Mus musculus GN=Myl6 PE=1 SV=3	2.14	2.16	280.3	108382	1	1	0	4.64	151	13462
>sp|Q60605-2|MYL6_MOUSE Isoform Smooth muscle of Myosin light polypeptide 6 OS=Mus musculus GN=Myl6
>sp|Q9JMH6|TRXR1_MOUSE Thioredoxin reductase 1, cytoplasmic OS=Mus musculus GN=Txnrd1 PE=1 SV=3	2.13	2.18	188.8	30012.1	1	1	0	2.45	613	22298
>sp|Q9EP75|CP4FE_MOUSE Leukotriene-B4 omega-hydroxylase 3 OS=Mus musculus GN=Cyp4f14 PE=2 SV=1	2.13	1.49	286.4	304473	4	4	1	8.59	524	4601
>sp|P63028|TCTP_MOUSE Translationally-controlled tumor protein OS=Mus musculus GN=Tpt1 PE=1 SV=1	2.09	2.1	365.2	191349	1	1	0	4.07	172	21058
>sp|Q99MZ7|PECR_MOUSE Peroxisomal trans-2-enoyl-CoA reductase OS=Mus musculus GN=Pecr PE=2 SV=1	2.05	2.08	165	38151.8	1	1	0	4.95	303	15453
>sp|Q61171|PRDX2_MOUSE Peroxiredoxin-2 OS=Mus musculus GN=Prdx2 PE=1 SV=3	2.05	2.06	223.9	80363.2	1	1	0	5.56	198	16429
>sp|P17095|HMGA1_MOUSE High mobility group protein HMG-I/HMG-Y OS=Mus musculus GN=Hmga1 PE=1 SV=4	2.05	2.05	118	66210.2	1	1	0	17.76	107	9324
>sp|P17095-1|HMGA1_MOUSE Isoform HMG-Y of High mobility group protein HMG-I/HMG-Y OS=Mus musculus GN=Hmga1
>sp|Q99P30|NUDT7_MOUSE Peroxisomal coenzyme A diphosphatase NUDT7 OS=Mus musculus GN=Nudt7 PE=1 SV=2	2.04	2.06	159.4	15569.4	1	1	0	4.24	236	14546
>sp|Q99P30-2|NUDT7_MOUSE Isoform 2 of Peroxisomal coenzyme A diphosphatase NUDT7 OS=Mus musculus GN=Nudt7
>sp|Q99P30-3|NUDT7_MOUSE Isoform 3 of Peroxisomal coenzyme A diphosphatase NUDT7 OS=Mus musculus GN=Nudt7
>sp|Q99P30-5|NUDT7_MOUSE Isoform 5 of Peroxisomal coenzyme A diphosphatase NUDT7 OS=Mus musculus GN=Nudt7
>sp|P21550|ENOB_MOUSE Beta-enolase OS=Mus musculus GN=Eno3 PE=1 SV=3	2.04	2.08	311.5	58203.4	1	1	0	1.61	434	6589
>Reverse >sp|Q9D964|GATM_MOUSE Glycine amidinotransferase, mitochondrial OS=Mus musculus GN=Gatm PE=1 SV=1	2.04	2.05	70.8	45669.9	2	1	1	4.26	423	32323
>Reverse >sp|Q8BU03|PWP2_MOUSE Periodic tryptophan protein 2 homolog OS=Mus musculus GN=Pwp2 PE=1 SV=1	1.99	2.07	300.4	188633	1	1	1	0.98	919	41080
>Reverse >sp|P50446|K2C6A_MOUSE Keratin, type II cytoskeletal 6A OS=Mus musculus GN=Krt6a PE=2 SV=3	1.98	2.01	150.5	92143.3	2	2	0	3.25	553	34922
>Reverse >sp|Q9Z331|K2C6B_MOUSE Keratin, type II cytoskeletal 6B OS=Mus musculus GN=Krt6b PE=1 SV=3
>sp|Q9QXZ0|MACF1_MOUSE Microtubule-actin cross-linking factor 1 OS=Mus musculus GN=Macf1 PE=1 SV=2	1.96	1.82	239.8	153354	3	3	0	0.42	7354	12202
>sp|Q9QXZ0-2|MACF1_MOUSE Isoform 2 of Microtubule-actin cross-linking factor 1 OS=Mus musculus GN=Macf1
>sp|Q9QXZ0-3|MACF1_MOUSE Isoform 3 of Microtubule-actin cross-linking factor 1 OS=Mus musculus GN=Macf1
>sp|Q9QXZ0-4|MACF1_MOUSE Isoform 4 of Microtubule-actin cross-linking factor 1 OS=Mus musculus GN=Macf1
>sp|Q62452|UD19_MOUSE UDP-glucuronosyltransferase 1-9 OS=Mus musculus GN=Ugt1a9 PE=1 SV=3	1.92	1.96	248.6	70512.9	1	1	0	1.52	528	22848
>Reverse >sp|O08648|M3K4_MOUSE Mitogen-activated protein kinase kinase kinase 4 OS=Mus musculus GN=Map3k4 PE=1 SV=2	1.91	1.47	375.7	1.47416e+06	30	1	0	0.44	1597	36369
>sp|Q920P3|DBC1_MOUSE Deleted in bladder cancer protein 1 homolog OS=Mus musculus GN=Dbc1 PE=2 SV=1	1.91	1.97	308	162487	1	1	0	1.05	760	5303
>sp|Q8CJ40|CROCC_MOUSE Rootletin OS=Mus musculus GN=Crocc PE=1 SV=2	1.91	2.08	268.8	117911	2	2	1	0.95	2009	4806
>sp|Q8CJ40-2|CROCC_MOUSE Isoform 2 of Rootletin OS=Mus musculus GN=Crocc
>sp|Q8CJ40-3|CROCC_MOUSE Isoform 3 of Rootletin OS=Mus musculus GN=Crocc
>sp|Q3UMY5|EMAL4_MOUSE Echinoderm microtubule-associated protein-like 4 OS=Mus musculus GN=Eml4 PE=1 SV=1	1.9	1.98	199.7	45103.7	1	1	0	1.21	988	6540
>sp|Q3UMY5-2|EMAL4_MOUSE Isoform 2 of Echinoderm microtubule-associated protein-like 4 OS=Mus musculus GN=Eml4
>sp|Q3UMY5-3|EMAL4_MOUSE Isoform 3 of Echinoderm microtubule-associated protein-like 4 OS=Mus musculus GN=Eml4
>sp|Q3UMY5-4|EMAL4_MOUSE Isoform 4 of Echinoderm microtubule-associated protein-like 4 OS=Mus musculus GN=Eml4
>sp|Q8CGK3|LONM_MOUSE Lon protease homolog, mitochondrial OS=Mus musculus GN=Lonp1 PE=1 SV=2	1.85	1.09	243.2	145970	3	3	1	2.85	949	11779
>Reverse >sp|Q91ZX7|LRP1_MOUSE Prolow-density lipoprotein receptor-related protein 1 OS=Mus musculus GN=Lrp1 PE=1 SV=1	1.82	2.17	284.9	194490	2	2	1	0.81	4545	36172
>sp|Q62059|CSPG2_MOUSE Versican core protein OS=Mus musculus GN=Vcan PE=1 SV=2	1.81	0.85	238.6	225418	4	4	0	1.13	3357	4918
>sp|Q62059-2|CSPG2_MOUSE Isoform V1 of Versican core protein OS=Mus musculus GN=Vcan
>sp|Q9D6P8|CALL3_MOUSE Calmodulin-like protein 3 OS=Mus musculus GN=Calml3 PE=2 SV=1	1.8	1.81	167.7	176798	1	1	0	10.74	149	2524
>sp|Q8CC88|K0564_MOUSE Uncharacterized protein KIAA0564 homolog OS=Mus musculus GN=Kiaa0564 PE=2 SV=2	1.79	1.45	289.4	197563	2	2	0	0.94	1905	10530
>Reverse >sp|P26039|TLN1_MOUSE Talin-1 OS=Mus musculus GN=Tln1 PE=1 SV=2	1.78	1.96	250.9	228432	3	3	2	1.1	2541	45685
>sp|Q8VCR2|DHB13_MOUSE 17-beta-hydroxysteroid dehydrogenase 13 OS=Mus musculus GN=Hsd17b13 PE=1 SV=1	1.62	1.65	112.3	15823.3	1	1	0	3.95	304	5613
>sp|Q8VCR2-2|DHB13_MOUSE Isoform 2 of 17-beta-hydroxysteroid dehydrogenase 13 OS=Mus musculus GN=Hsd17b13
>sp|Q9DAI4|ZBT43_MOUSE Zinc finger and BTB domain-containing protein 43 OS=Mus musculus GN=Zbtb43 PE=2 SV=2	1.62	1.64	275.5	232095	2	1	0	1.71	467	23682
>Reverse >sp|O08789|MNT_MOUSE Max-binding protein MNT OS=Mus musculus GN=Mnt PE=2 SV=2	1.56	1.57	297.1	416581	3	2	0	2.71	591	37191
>Reverse >sp|P59242|CING_MOUSE Cingulin OS=Mus musculus GN=Cgn PE=1 SV=1	1.56	1.66	234.1	105020	1	1	0	0.76	1191	28012
>Reverse >sp|P59242-2|CING_MOUSE Isoform 2 of Cingulin OS=Mus musculus GN=Cgn
>sp|P62281|RS11_MOUSE 40S ribosomal protein S11 OS=Mus musculus GN=Rps11 PE=2 SV=3	1.55	1.57	284.1	111966	1	1	0	4.43	158	18161
>sp|P40124|CAP1_MOUSE Adenylyl cyclase-associated protein 1 OS=Mus musculus GN=Cap1 PE=1 SV=4	1.54	0.73	211.8	269895	4	4	0	7.81	474	2571
>sp|P50172|DHI1_MOUSE Corticosteroid 11-beta-dehydrogenase isozyme 1 OS=Mus musculus GN=Hsd11b1 PE=1 SV=3	1.54	1.56	165.2	42461.5	1	1	0	4.45	292	5630
>sp|P23780|BGAL_MOUSE Beta-galactosidase OS=Mus musculus GN=Glb1 PE=2 SV=1	1.52	1.05	212	238512	5	4	0	6.34	647	1997
>sp|Q8BH59|CMC1_MOUSE Calcium-binding mitochondrial carrier protein Aralar1 OS=Mus musculus GN=Slc25a12 PE=1 SV=1	1.51	1.56	137.5	37033.7	1	1	0	1.92	677	4134
>sp|P14152|MDHC_MOUSE Malate dehydrogenase, cytoplasmic OS=Mus musculus GN=Mdh1 PE=1 SV=3	1.49	1.52	201.1	24634.9	1	1	0	3.59	334	12515
>Reverse >sp|Q6P1D5|SE6L1_MOUSE Seizure 6-like protein OS=Mus musculus GN=Sez6l PE=2 SV=1	1.48	1.54	222.3	258206	2	1	0	1.04	963	43147
>Reverse >sp|Q6P1D5-2|SE6L1_MOUSE Isoform 2 of Seizure 6-like protein OS=Mus musculus GN=Sez6l
>Reverse >sp|Q9D416|AR13A_MOUSE ADP-ribosylation factor-like protein 13A OS=Mus musculus GN=Arl13a PE=2 SV=1	1.44	1.45	276.5	369776	2	1	0	1.88	372	25425
>sp|P47962|RL5_MOUSE 60S ribosomal protein L5 OS=Mus musculus GN=Rpl5 PE=1 SV=3	1.44	1.46	140.3	76689.4	2	2	1	7.07	297	17744
>sp|Q9CZ44|NSF1C_MOUSE NSFL1 cofactor p47 OS=Mus musculus GN=Nsfl1c PE=1 SV=1	1.41	1.42	58	32474.9	2	1	0	4.05	370	14417
>sp|Q9CZ44-2|NSF1C_MOUSE Isoform 2 of NSFL1 cofactor p47 OS=Mus musculus GN=Nsfl1c
>sp|Q9CZ44-3|NSF1C_MOUSE Isoform 3 of NSFL1 cofactor p47 OS=Mus musculus GN=Nsfl1c
>sp|A2AJN7|S4A11_MOUSE Sodium bicarbonate transporter-like protein 11 OS=Mus musculus GN=Slc4a11 PE=2 SV=1	1.41	1.37	247.6	680962	5	4	3	3.83	862	18606
>sp|Q8BYK5|PHAR3_MOUSE Phosphatase and actin regulator 3 OS=Mus musculus GN=Phactr3 PE=1 SV=2	1.38	1.43	231.5	73196.3	1	1	0	1.25	558	15588
>sp|Q8BYK5-2|PHAR3_MOUSE Isoform 2 of Phosphatase and actin regulator 3 OS=Mus musculus GN=Phactr3
>sp|Q8BYK5-3|PHAR3_MOUSE Isoform 3 of Phosphatase and actin regulator 3 OS=Mus musculus GN=Phactr3
>sp|Q8BYK5-4|PHAR3_MOUSE Isoform 4 of Phosphatase and actin regulator 3 OS=Mus musculus GN=Phactr3
>sp|O88569|ROA2_MOUSE Heterogeneous nuclear ribonucleoproteins A2/B1 OS=Mus musculus GN=Hnrnpa2b1 PE=1 SV=2	1.38	1.34	207.3	106153	2	2	0	7.37	353	17976
>sp|O88569-2|ROA2_MOUSE Isoform 2 of Heterogeneous nuclear ribonucleoproteins A2/B1 OS=Mus musculus GN=Hnrnpa2b1
>sp|O88569-3|ROA2_MOUSE Isoform 3 of Heterogeneous nuclear ribonucleoproteins A2/B1 OS=Mus musculus GN=Hnrnpa2b1
>sp|Q64152|BTF3_MOUSE Transcription factor BTF3 OS=Mus musculus GN=Btf3 PE=2 SV=3	1.38	1.4	241	62371.4	1	1	0	3.92	204	2225
>sp|Q64152-2|BTF3_MOUSE Isoform 2 of Transcription factor BTF3 OS=Mus musculus GN=Btf3
>sp|P56959|FUS_MOUSE RNA-binding protein FUS OS=Mus musculus GN=Fus PE=2 SV=1	1.35	1.4	118.9	28543.4	1	1	0	2.7	518	7913
>sp|Q9CY50|SSRA_MOUSE Translocon-associated protein subunit alpha OS=Mus musculus GN=Ssr1 PE=1 SV=1	1.32	1.34	218.7	46998.9	1	1	0	3.85	286	20239
>sp|O35084|CP27B_MOUSE 25-hydroxyvitamin D-1 alpha hydroxylase, mitochondrial OS=Mus musculus GN=Cyp27b1 PE=2 SV=2	1.31	1.35	188.4	53143.2	1	1	0	1.38	507	4567
>sp|P28843|DPP4_MOUSE Dipeptidyl peptidase 4 OS=Mus musculus GN=Dpp4 PE=1 SV=3	1.31	0.83	201.5	95610	2	2	0	2.63	760	6016
>Reverse >sp|Q07968|F13B_MOUSE Coagulation factor XIII B chain OS=Mus musculus GN=F13b PE=1 SV=1	1.28	1.34	248.4	248270	1	1	0	1.2	668	31193
>sp|Q9JLV5|CUL3_MOUSE Cullin-3 OS=Mus musculus GN=Cul3 PE=1 SV=1	1.25	0.83	303.5	245396	2	2	0	1.04	768	5087
>sp|Q8BMS1|ECHA_MOUSE Trifunctional enzyme subunit alpha, mitochondrial OS=Mus musculus GN=Hadha PE=1 SV=1	1.25	0.82	201.3	131941	2	2	0	3.01	763	6294
>sp|P08003|PDIA4_MOUSE Protein disulfide-isomerase A4 OS=Mus musculus GN=Pdia4 PE=1 SV=3	1.25	1.3	192.1	60248.6	1	1	0	1.72	638	15383
>sp|Q9JHW9|AL1A3_MOUSE Aldehyde dehydrogenase family 1 member A3 OS=Mus musculus GN=Aldh1a3 PE=2 SV=1	1.24	0.84	224.5	387834	3	3	1	6.05	512	752
>sp|Q64481|CP3AG_MOUSE Cytochrome P450 3A16 OS=Mus musculus GN=Cyp3a16 PE=2 SV=2	1.23	1.24	219	145008	2	2	1	1.59	504	4593
>sp|P34884|MIF_MOUSE Macrophage migration inhibitory factor OS=Mus musculus GN=Mif PE=1 SV=2	1.21	1.2	253.4	142155	2	1	0	9.57	115	12803
>sp|P11881|ITPR1_MOUSE Inositol 1,4,5-trisphosphate receptor type 1 OS=Mus musculus GN=Itpr1 PE=1 SV=2	1.19	1.39	153.6	150565	2	2	1	1.82	2749	10405
>sp|P11881-2|ITPR1_MOUSE Isoform 2 of Inositol 1,4,5-trisphosphate receptor type 1 OS=Mus musculus GN=Itpr1
>sp|P11881-3|ITPR1_MOUSE Isoform 3 of Inositol 1,4,5-trisphosphate receptor type 1 OS=Mus musculus GN=Itpr1
>sp|P11881-4|ITPR1_MOUSE Isoform 4 of Inositol 1,4,5-trisphosphate receptor type 1 OS=Mus musculus GN=Itpr1
>sp|P11881-5|ITPR1_MOUSE Isoform 5 of Inositol 1,4,5-trisphosphate receptor type 1 OS=Mus musculus GN=Itpr1
>sp|P11881-6|ITPR1_MOUSE Isoform 6 of Inositol 1,4,5-trisphosphate receptor type 1 OS=Mus musculus GN=Itpr1
>sp|P11881-7|ITPR1_MOUSE Isoform 7 of Inositol 1,4,5-trisphosphate receptor type 1 OS=Mus musculus GN=Itpr1
>sp|P11881-8|ITPR1_MOUSE Isoform 8 of Inositol 1,4,5-trisphosphate receptor type 1 OS=Mus musculus GN=Itpr1
>sp|Q8BVD5|MPP7_MOUSE MAGUK p55 subfamily member 7 OS=Mus musculus GN=Mpp7 PE=2 SV=2	1.19	1.24	126.4	67991.4	1	1	1	2.08	576	13104
>sp|Q8BVD5-2|MPP7_MOUSE Isoform 2 of MAGUK p55 subfamily member 7 OS=Mus musculus GN=Mpp7
>sp|Q8BVD5-3|MPP7_MOUSE Isoform 3 of MAGUK p55 subfamily member 7 OS=Mus musculus GN=Mpp7
>sp|Q8BVD5-4|MPP7_MOUSE Isoform 4 of MAGUK p55 subfamily member 7 OS=Mus musculus GN=Mpp7
>sp|Q8BVD5-5|MPP7_MOUSE Isoform 5 of MAGUK p55 subfamily member 7 OS=Mus musculus GN=Mpp7
>sp|Q9CQX2|CYB5B_MOUSE Cytochrome b5 type B OS=Mus musculus GN=Cyb5b PE=1 SV=1	1.15	1.14	192.4	81677.7	2	1	0	8.22	146	5200
>sp|O88451|RDH7_MOUSE Retinol dehydrogenase 7 OS=Mus musculus GN=Rdh7 PE=2 SV=1	1.15	1.11	234.4	172127	3	3	0	8.86	316	17297
>Reverse >sp|Q9D7V9|NAAA_MOUSE N-acylethanolamine-hydrolyzing acid amidase OS=Mus musculus GN=Naaa PE=2 SV=2	1.13	1.16	260.8	108207	1	1	0	2.21	362	37799
>Reverse >sp|Q497N7|CF201_MOUSE Uncharacterized protein C6orf201 homolog OS=Mus musculus PE=2 SV=1	1.13	1.1	237.2	444537	3	2	2	7.49	227	27771
>sp|P16332|MUTA_MOUSE Methylmalonyl-CoA mutase, mitochondrial OS=Mus musculus GN=Mut PE=2 SV=2	1.12	1.18	210.6	47093.6	1	1	0	1.74	748	13389
>sp|CAS2_BOVIN|(Common contaminant protein)	1.09	1.11	231.6	33523.1	1	1	0	3.6	222	24212
>sp|Q9JJ59|ABCB9_MOUSE ATP-binding cassette sub-family B member 9 OS=Mus musculus GN=Abcb9 PE=2 SV=1	1.09	1.15	359.1	98695.7	1	1	0	0.92	762	170
>sp|Q9JJ59-2|ABCB9_MOUSE Isoform 2 of ATP-binding cassette sub-family B member 9 OS=Mus musculus GN=Abcb9
>sp|Q8BHN1|TXLNG_MOUSE Gamma-taxilin OS=Mus musculus GN=Txlng PE=1 SV=1	1.08	1.11	252.1	1.4873e+06	2	1	0	1.72	524	22562
>sp|Q8BHN1-2|TXLNG_MOUSE Isoform 2 of Gamma-taxilin OS=Mus musculus GN=Txlng
>sp|Q8BHN1-3|TXLNG_MOUSE Isoform 3 of Gamma-taxilin OS=Mus musculus GN=Txlng
>Reverse >sp|Q8K1S1|LGI4_MOUSE Leucine-rich repeat LGI family member 4 OS=Mus musculus GN=Lgi4 PE=1 SV=1	1.08	1.13	236.4	230330	1	1	0	1.86	537	35825
>sp|Q99MV5-2|M10L1_MOUSE Isoform 2 of Putative helicase Mov10l1 OS=Mus musculus GN=Mov10l1	1.08	1.11	245.3	262346	2	1	0	1.27	550	12132
>Reverse >sp|Q62504|MINT_MOUSE Msx2-interacting protein OS=Mus musculus GN=Spen PE=1 SV=2	1.08	1.38	236.9	154004	2	2	0	0.77	3644	37036
>Reverse >sp|Q62504-2|MINT_MOUSE Isoform 2 of Msx2-interacting protein OS=Mus musculus GN=Spen
>Reverse >sp|Q62504-3|MINT_MOUSE Isoform 3 of Msx2-interacting protein OS=Mus musculus GN=Spen
>Reverse >sp|Q9Z1B3|PLCB1_MOUSE 1-phosphatidylinositol-4,5-bisphosphate phosphodiesterase beta-1 OS=Mus musculus GN=Plcb1 PE=1 SV=2	1.06	1.16	276.6	68079.2	1	1	0	0.66	1216	40143
>Reverse >sp|Q9Z1B3-2|PLCB1_MOUSE Isoform B of 1-phosphatidylinositol-4,5-bisphosphate phosphodiesterase beta-1 OS=Mus musculus GN=Plcb1
>Reverse >sp|Q9Z1B3-3|PLCB1_MOUSE Isoform C of 1-phosphatidylinositol-4,5-bisphosphate phosphodiesterase beta-1 OS=Mus musculus GN=Plcb1
>sp|Q9DBE0|CSAD_MOUSE Cysteine sulfinic acid decarboxylase OS=Mus musculus GN=Csad PE=2 SV=1	1.05	0.85	180.5	231934	3	2	0	4.46	493	4871
>sp|Q505F1|NR2C1_MOUSE Nuclear receptor subfamily 2 group C member 1 OS=Mus musculus GN=Nr2c1 PE=1 SV=3	1.04	1.09	271.1	50164	1	1	0	1.36	590	14321
>sp|Q505F1-2|NR2C1_MOUSE Isoform 2 of Nuclear receptor subfamily 2 group C member 1 OS=Mus musculus GN=Nr2c1
>Reverse >sp|Q9D2X5|SCC4_MOUSE MAU2 chromatid cohesion factor homolog OS=Mus musculus GN=Mau2 PE=2 SV=3	1.03	1.08	256.5	136967	1	1	0	1.29	619	43015

## Sheet: Spot 4
Description	|Log Prob|	Best |Log Prob|	Best score	Total Intensity	# of spectra	# of unique peptides	# of mod peptides	Coverage %	# AA's in protein	Protein DB number
>sp|Q03265|ATPA_MOUSE ATP synthase subunit alpha, mitochondrial OS=Mus musculus GN=Atp5a1 PE=1 SV=1	194.17	8.74	682.9	5.83844e+07	205	63	22	56.06	553	1671
>sp|Q9EQ20|MMSA_MOUSE Methylmalonate-semialdehyde dehydrogenase [acylating], mitochondrial OS=Mus musculus GN=Aldh6a1 PE=1 SV=1	168.06	11.12	701.1	27187078	176	54	22	52.34	535	12968
>sp|Q8C196|CPSM_MOUSE Carbamoyl-phosphate synthase [ammonia], mitochondrial OS=Mus musculus GN=Cps1 PE=1 SV=2	155.74	5.75	522.2	5.79989e+06	77	61	16	31.33	1500	4652
>sp|P26443|DHE3_MOUSE Glutamate dehydrogenase 1, mitochondrial OS=Mus musculus GN=Glud1 PE=1 SV=1	134.76	10.35	713.2	15543734	106	43	12	47.13	558	5628
>sp|P47738|ALDH2_MOUSE Aldehyde dehydrogenase, mitochondrial OS=Mus musculus GN=Aldh2 PE=1 SV=1	128.71	8.23	626.9	162186048	474	43	10	50.29	519	776
>sp|P24270|CATA_MOUSE Catalase OS=Mus musculus GN=Cat PE=1 SV=4	128.43	8.37	648.4	1.20727e+07	92	45	10	55.6	527	2638
>sp|Q9CZS1|AL1B1_MOUSE Aldehyde dehydrogenase X, mitochondrial OS=Mus musculus GN=Aldh1b1 PE=2 SV=1	117.92	8.26	637.1	3.2449e+07	108	40	13	43.55	519	754
>sp|Q9CPY7|AMPL_MOUSE Cytosol aminopeptidase OS=Mus musculus GN=Lap3 PE=1 SV=3	108.19	10.74	731.9	3.93313e+06	56	38	12	47.59	519	857
>sp|Q9JLJ2|AL9A1_MOUSE 4-trimethylaminobutyraldehyde dehydrogenase OS=Mus musculus GN=Aldh9a1 PE=1 SV=1	95.61	6.59	601.1	3.49415e+06	37	31	11	44.94	494	770
>sp|O08749|DLDH_MOUSE Dihydrolipoyl dehydrogenase, mitochondrial OS=Mus musculus GN=Dld PE=1 SV=2	75.17	5.85	507.4	1.793e+07	76	31	10	35.17	509	5743
>sp|Q99LB7|SARDH_MOUSE Sarcosine dehydrogenase, mitochondrial OS=Mus musculus GN=Sardh PE=1 SV=1	74.61	5.22	482.1	4.83994e+06	48	25	6	20.89	919	18698
>sp|Q8BWF0|SSDH_MOUSE Succinate-semialdehyde dehydrogenase, mitochondrial OS=Mus musculus GN=Aldh5a1 PE=1 SV=1	70.91	5.38	555.4	2.61715e+06	31	24	5	37.67	523	20216
>sp|Q9DBF1|AL7A1_MOUSE Alpha-aminoadipic semialdehyde dehydrogenase OS=Mus musculus GN=Aldh7a1 PE=1 SV=4	68.62	9.74	683.4	2.68471e+06	28	18	6	26.35	539	767
>sp|K22E_HUMAN|(Common contaminant protein)	64.13	5.49	508.9	1764926	29	24	2	36.12	645	24164
>sp|Q8VCT4|CES3_MOUSE Carboxylesterase 3 OS=Mus musculus GN=Ces3 PE=1 SV=1	63.08	4.94	566.3	2.67359e+06	31	21	6	29.56	565	3521
>sp|Q921I1|TRFE_MOUSE Serotransferrin OS=Mus musculus GN=Tf PE=1 SV=1	62.93	5.37	506.3	1.18633e+06	27	21	1	30.13	697	22124
>sp|P50544|ACADV_MOUSE Very long-chain specific acyl-CoA dehydrogenase, mitochondrial OS=Mus musculus GN=Acadvl PE=1 SV=3	62.46	4.51	417.5	1.89819e+06	23	22	6	28.96	656	261
>sp|P54869|HMCS2_MOUSE Hydroxymethylglutaryl-CoA synthase, mitochondrial OS=Mus musculus GN=Hmgcs2 PE=1 SV=2	61.61	5.95	555.1	3.52228e+06	29	21	5	28.35	508	9320
>sp|Q99MN9|PCCB_MOUSE Propionyl-CoA carboxylase beta chain, mitochondrial OS=Mus musculus GN=Pccb PE=1 SV=2	58.71	5.2	480.5	1.38794e+06	26	21	3	37.15	541	15240
>sp|Q3ULD5|MCCB_MOUSE Methylcrotonoyl-CoA carboxylase beta chain, mitochondrial OS=Mus musculus GN=Mccc2 PE=2 SV=1	51.69	5.34	386.3	1.18508e+06	19	18	5	31.26	563	12446
>sp|Q9JJL8|SYSM_MOUSE Serine--tRNA ligase, mitochondrial OS=Mus musculus GN=Sars2 PE=2 SV=2	51.34	5.93	520.9	1.79917e+06	31	18	4	36.49	518	20631
>sp|Q8BGT5|ALAT2_MOUSE Alanine aminotransferase 2 OS=Mus musculus GN=Gpt2 PE=2 SV=1	50.18	5.19	556.3	1.62071e+06	26	23	8	30.65	522	772
>sp|Q8K2B3|DHSA_MOUSE Succinate dehydrogenase [ubiquinone] flavoprotein subunit, mitochondrial OS=Mus musculus GN=Sdha PE=1 SV=1	49.52	5.37	562.2	2266131	22	18	3	23.8	664	5643
>sp|Q8CHT0|AL4A1_MOUSE Delta-1-pyrroline-5-carboxylate dehydrogenase, mitochondrial OS=Mus musculus GN=Aldh4a1 PE=1 SV=3	49.49	5.53	532.1	4.12627e+06	34	25	5	30.07	562	765
>sp|Q9CQN1|TRAP1_MOUSE Heat shock protein 75 kDa, mitochondrial OS=Mus musculus GN=Trap1 PE=1 SV=1	47.55	5.31	440.1	978179	18	18	1	26.2	706	22105
>sp|Q05920|PYC_MOUSE Pyruvate carboxylase, mitochondrial OS=Mus musculus GN=Pc PE=1 SV=1	44.83	3.96	453.4	1.79945e+06	25	22	4	17.49	1178	16878
>sp|P20060|HEXB_MOUSE Beta-hexosaminidase subunit beta OS=Mus musculus GN=Hexb PE=2 SV=2	43.79	4.37	465.7	2.01407e+06	28	21	6	25.37	536	9225
>sp|Q8VCW8|ACSF2_MOUSE Acyl-CoA synthetase family member 2, mitochondrial OS=Mus musculus GN=Acsf2 PE=2 SV=1	43.18	5.62	433.5	1053367	18	16	4	23.09	615	373
>sp|Q9Z0X1|AIFM1_MOUSE Apoptosis-inducing factor 1, mitochondrial OS=Mus musculus GN=Aifm1 PE=1 SV=1	41.13	6.31	524.1	908103	20	16	3	25.16	612	672
>sp|P00687|AMY1_MOUSE Alpha-amylase 1 OS=Mus musculus GN=Amy1 PE=1 SV=2	38.2	8.74	643.8	1.46509e+06	19	16	4	28.38	511	875
>sp|Q921G7|ETFD_MOUSE Electron transfer flavoprotein-ubiquinone oxidoreductase, mitochondrial OS=Mus musculus GN=Etfdh PE=1 SV=1	38.08	4.96	430.7	1394336	19	17	4	21.27	616	6821
>sp|Q99MR8|MCCA_MOUSE Methylcrotonoyl-CoA carboxylase subunit alpha, mitochondrial OS=Mus musculus GN=Mccc1 PE=2 SV=2	38.06	5.09	363.4	996713	21	17	2	25.38	717	12445
>sp|P61922|GABT_MOUSE 4-aminobutyrate aminotransferase, mitochondrial OS=Mus musculus GN=Abat PE=1 SV=1	36.98	5.5	543	1.27799e+06	16	13	3	25.4	500	8029
>sp|Q3UEG6|AGT2_MOUSE Alanine--glyoxylate aminotransferase 2, mitochondrial OS=Mus musculus GN=Agxt2 PE=2 SV=1	36.42	5.78	469	1.45068e+06	18	15	5	25.73	513	650
>sp|Q8BGH2|SAM50_MOUSE Sorting and assembly machinery component 50 homolog OS=Mus musculus GN=Samm50 PE=1 SV=1	36.2	4.94	570.7	1.92488e+06	24	19	4	34.54	469	18678
>sp|P11725|OTC_MOUSE Ornithine carbamoyltransferase, mitochondrial OS=Mus musculus GN=Otc PE=1 SV=1	35.74	4.1	348	717994	13	12	3	27.68	354	14875
>sp|P51174|ACADL_MOUSE Long-chain specific acyl-CoA dehydrogenase, mitochondrial OS=Mus musculus GN=Acadl PE=2 SV=2	35.63	5.48	433.2	906493	18	14	7	26.05	430	258
>sp|Q99KI0|ACON_MOUSE Aconitate hydratase, mitochondrial OS=Mus musculus GN=Aco2 PE=1 SV=1	35.51	7.09	548.1	1.03267e+06	17	14	1	18.33	780	350
>sp|P27773|PDIA3_MOUSE Protein disulfide-isomerase A3 OS=Mus musculus GN=Pdia3 PE=1 SV=2	35.45	4.27	394.5	877697	19	16	1	28.12	505	15382
>sp|K2C1_HUMAN|(Common contaminant protein)	34.69	4.53	387.4	1.87657e+06	27	23	4	30.64	643	24165
>sp|K1C10_HUMAN|(Common contaminant protein)	34.57	4.76	468.9	2.66975e+06	23	20	4	20.4	593	24150
>sp|Q9R0H0|ACOX1_MOUSE Peroxisomal acyl-coenzyme A oxidase 1 OS=Mus musculus GN=Acox1 PE=1 SV=5	33.25	4.54	427.1	1.33283e+06	20	13	2	19.67	661	361
>sp|Q9DBT9|M2GD_MOUSE Dimethylglycine dehydrogenase, mitochondrial OS=Mus musculus GN=Dmgdh PE=1 SV=1	31.01	4.93	457.2	672002	15	14	1	16.57	869	12140
>sp|Q99K67|AASS_MOUSE Alpha-aminoadipic semialdehyde synthase, mitochondrial OS=Mus musculus GN=Aass PE=2 SV=1	30.64	4.51	523.7	1.23706e+06	16	9	1	11.23	926	142
>sp|P47791|GSHR_MOUSE Glutathione reductase, mitochondrial OS=Mus musculus GN=Gsr PE=2 SV=3	29.46	5.29	389.4	595454	11	8	1	14.6	500	8846
>sp|P50285|FMO1_MOUSE Dimethylaniline monooxygenase [N-oxide-forming] 1 OS=Mus musculus GN=Fmo1 PE=1 SV=1	29.41	4.74	383.7	708588	14	14	2	21.99	532	7689
>sp|Q01339|APOH_MOUSE Beta-2-glycoprotein 1 OS=Mus musculus GN=Apoh PE=1 SV=1	29.36	4.91	416	972570	15	12	0	34.78	345	1178
>sp|Q8BMS1|ECHA_MOUSE Trifunctional enzyme subunit alpha, mitochondrial OS=Mus musculus GN=Hadha PE=1 SV=1	28.95	5.71	348.6	661996	12	12	1	15.6	763	6294
>sp|Q64435|UD16_MOUSE UDP-glucuronosyltransferase 1-6 OS=Mus musculus GN=Ugt1a6 PE=1 SV=1	28.52	4.51	462.3	1.2671e+06	17	12	3	13.75	531	22846
>sp|Q9DC50|OCTC_MOUSE Peroxisomal carnitine O-octanoyltransferase OS=Mus musculus GN=Crot PE=1 SV=1	27.32	5.4	342.8	673551	10	9	1	13.56	612	14646
>sp|P45952|ACADM_MOUSE Medium-chain specific acyl-CoA dehydrogenase, mitochondrial OS=Mus musculus GN=Acadm PE=1 SV=1	27.17	4.41	325.3	628739	11	11	1	26.13	421	259
>sp|Q9QXX4|CMC2_MOUSE Calcium-binding mitochondrial carrier protein Aralar2 OS=Mus musculus GN=Slc25a13 PE=1 SV=1	27.02	4.62	420.2	1.10749e+06	19	14	2	19.82	676	4135
>sp|P32020|NLTP_MOUSE Non-specific lipid-transfer protein OS=Mus musculus GN=Scp2 PE=1 SV=3	26.84	4.45	347.7	1.10274e+06	19	17	5	23.03	547	14127
>sp|Q8C165|P20D1_MOUSE Probable carboxypeptidase PM20D1 OS=Mus musculus GN=Pm20d1 PE=2 SV=1	25.79	5.06	435.7	570755	10	9	2	20.08	503	14936
>sp|Q8BWT1|THIM_MOUSE 3-ketoacyl-CoA thiolase, mitochondrial OS=Mus musculus GN=Acaa2 PE=1 SV=3	25.5	4.1	314.9	730536	12	11	3	31.99	397	21320
>sp|Q921X9|PDIA5_MOUSE Protein disulfide-isomerase A5 OS=Mus musculus GN=Pdia5 PE=2 SV=1	24.19	4.36	397.4	655934	12	10	1	21.47	517	15384
>sp|P41216|ACSL1_MOUSE Long-chain-fatty-acid--CoA ligase 1 OS=Mus musculus GN=Acsl1 PE=1 SV=2	23.69	3.83	412.9	1.0389e+06	15	15	0	19.17	699	379
>sp|P63038|CH60_MOUSE 60 kDa heat shock protein, mitochondrial OS=Mus musculus GN=Hspd1 PE=1 SV=1	22.68	4.41	409.1	624768	10	8	0	12.91	573	3647
>sp|P97742|CPT1A_MOUSE Carnitine O-palmitoyltransferase 1, liver isoform OS=Mus musculus GN=Cpt1a PE=2 SV=4	22.08	4.67	423.7	941788	11	9	0	10.22	773	4653
>sp|Q9DCN2|NB5R3_MOUSE NADH-cytochrome b5 reductase 3 OS=Mus musculus GN=Cyb5r3 PE=1 SV=3	21.62	4.22	428.1	1.14838e+06	13	10	2	30.56	301	13683
>sp|Q9DCN2-2|NB5R3_MOUSE Isoform 2 of NADH-cytochrome b5 reductase 3 OS=Mus musculus GN=Cyb5r3
>sp|P56593|CP2AC_MOUSE Cytochrome P450 2A12 OS=Mus musculus GN=Cyp2a12 PE=1 SV=2	21.6	4.45	356.7	395277	12	10	0	21.54	492	4570
>sp|Q571F8|GLSL_MOUSE Glutaminase liver isoform, mitochondrial OS=Mus musculus GN=Gls2 PE=2 SV=2	21.3	4.45	381.4	479990	8	7	1	10.47	602	8403
>sp|Q05421|CP2E1_MOUSE Cytochrome P450 2E1 OS=Mus musculus GN=Cyp2e1 PE=1 SV=1	21.07	4.92	366	671829	11	11	2	17.44	493	4580
>sp|Q91X34|BAAT_MOUSE Bile acid-CoA:amino acid N-acyltransferase OS=Mus musculus GN=Baat PE=1 SV=1	20.9	4.44	416.9	769134	11	9	2	15.71	420	1823
>sp|O88451|RDH7_MOUSE Retinol dehydrogenase 7 OS=Mus musculus GN=Rdh7 PE=2 SV=1	20.65	4.39	518.4	664615	10	9	0	28.16	316	17297
>sp|Q8BW75|AOFB_MOUSE Amine oxidase [flavin-containing] B OS=Mus musculus GN=Maob PE=1 SV=4	20.63	7.31	573.4	628936	11	10	2	15.77	520	1076
>sp|Q91ZA3|PCCA_MOUSE Propionyl-CoA carboxylase alpha chain, mitochondrial OS=Mus musculus GN=Pcca PE=2 SV=2	20.61	4.26	340.6	370597	10	10	3	14.92	724	15239
>sp|Q60649|CLPB_MOUSE Caseinolytic peptidase B protein homolog OS=Mus musculus GN=Clpb PE=1 SV=1	20.38	4.53	325.6	486319	12	9	1	11.96	677	4104
>sp|Q71RI9|KAT3_MOUSE Kynurenine--oxoglutarate transaminase 3 OS=Mus musculus GN=Ccbl2 PE=1 SV=1	20.17	4.8	372.4	281680	9	8	2	17.58	455	10761
>sp|Q71RI9-2|KAT3_MOUSE Isoform 2 of Kynurenine--oxoglutarate transaminase 3 OS=Mus musculus GN=Ccbl2
>sp|Q9D0K2|SCOT1_MOUSE Succinyl-CoA:3-ketoacid-coenzyme A transferase 1, mitochondrial OS=Mus musculus GN=Oxct1 PE=1 SV=1	19.91	4.54	345.9	426556	10	9	1	17.88	520	18860
>sp|Q9DCN1|NUD12_MOUSE Peroxisomal NADH pyrophosphatase NUDT12 OS=Mus musculus GN=Nudt12 PE=2 SV=1	19.91	4.09	387.7	831569	11	10	2	23.16	462	14522
>sp|P52196|THTR_MOUSE Thiosulfate sulfurtransferase OS=Mus musculus GN=Tst PE=1 SV=3	19.08	4.44	308.2	511334	11	10	1	35.69	297	21351
>sp|Q9DBG1|CP27A_MOUSE Sterol 26-hydroxylase, mitochondrial OS=Mus musculus GN=Cyp27a1 PE=1 SV=1	17.93	5.89	550.2	427384	11	9	4	11.44	533	4566
>sp|Q99K23|UFSP2_MOUSE Ufm1-specific protease 2 OS=Mus musculus GN=Ufsp2 PE=1 SV=1	17.88	4.86	448.8	476636	12	9	1	20.17	461	22871
>sp|Q8QZT1|THIL_MOUSE Acetyl-CoA acetyltransferase, mitochondrial OS=Mus musculus GN=Acat1 PE=1 SV=1	17.7	5.47	328.6	275592	8	7	1	18.63	424	21319
>sp|B7ZMP1|XPP3_MOUSE Probable Xaa-Pro aminopeptidase 3 OS=Mus musculus GN=Xpnpep3 PE=2 SV=1	17.69	4.5	414.4	487198	9	7	2	11.66	506	23546
>sp|P51881|ADT2_MOUSE ADP/ATP translocase 2 OS=Mus musculus GN=Slc25a5 PE=1 SV=3	17.62	4.06	351.1	580115	8	8	0	25.17	298	570
>sp|P25688|URIC_MOUSE Uricase OS=Mus musculus GN=Uox PE=1 SV=2	16.54	4.17	473.6	638685	9	7	1	24.09	303	22959
>sp|Q91X77|CY250_MOUSE Cytochrome P450 2C50 OS=Mus musculus GN=Cyp2c50 PE=1 SV=2	16.15	4.28	403.7	538919	14	12	1	24.49	490	5194
>sp|P58252|EF2_MOUSE Elongation factor 2 OS=Mus musculus GN=Eef2 PE=1 SV=2	16.03	4.45	404.4	455739	7	7	1	7.81	858	6357
>sp|P51660|DHB4_MOUSE Peroxisomal multifunctional enzyme type 2 OS=Mus musculus GN=Hsd17b4 PE=1 SV=3	15.92	4.6	456.4	182534	5	5	0	8.3	735	5618
>sp|K1C9_HUMAN|(Common contaminant protein)	15.48	5.62	443.5	437411	9	7	1	14.77	623	24152
>sp|P38647|GRP75_MOUSE Stress-70 protein, mitochondrial OS=Mus musculus GN=Hspa9 PE=1 SV=2	15.36	3.86	422.7	268235	7	7	0	9.87	679	8805
>sp|Q8BGA8|ACSM5_MOUSE Acyl-coenzyme A synthetase ACSM5, mitochondrial OS=Mus musculus GN=Acsm5 PE=2 SV=1	15.01	5.46	330.1	200719	8	6	1	12.28	578	394
>sp|Q8K370|ACD10_MOUSE Acyl-CoA dehydrogenase family member 10 OS=Mus musculus GN=Acad10 PE=2 SV=1	14.95	5.56	293	357845	10	8	0	7.95	1069	284
>sp|Q91VA0-2|ACSM1_MOUSE Isoform 2 of Acyl-coenzyme A synthetase ACSM1, mitochondrial OS=Mus musculus GN=Acsm1	14.69	5.44	258.9	228256	6	6	1	10.07	546	387
>sp|P05202|AATM_MOUSE Aspartate aminotransferase, mitochondrial OS=Mus musculus GN=Got2 PE=1 SV=1	14.69	5.49	318.3	379319	7	7	1	15.81	430	150
>sp|TRYP_PIG|(Common contaminant protein)	14.69	4.42	444	5922848	21	4	1	16.45	231	24193
>sp|Q99LC5|ETFA_MOUSE Electron transfer flavoprotein subunit alpha, mitochondrial OS=Mus musculus GN=Etfa PE=1 SV=2	14.08	4.41	317.9	364319	8	8	0	29.13	333	6819
>sp|Q3TQB2|FXRD1_MOUSE FAD-dependent oxidoreductase domain-containing protein 1 OS=Mus musculus GN=Foxred1 PE=2 SV=1	14.03	3.32	332.6	351828	7	6	1	12.53	487	7958
>sp|Q3TQB2-2|FXRD1_MOUSE Isoform 2 of FAD-dependent oxidoreductase domain-containing protein 1 OS=Mus musculus GN=Foxred1
>sp|P38060|HMGCL_MOUSE Hydroxymethylglutaryl-CoA lyase, mitochondrial OS=Mus musculus GN=Hmgcl PE=1 SV=2	14.01	4.23	389.9	243810	5	4	0	13.85	325	9332
>sp|P56657|CP240_MOUSE Cytochrome P450 2C40 OS=Mus musculus GN=Cyp2c40 PE=2 SV=2	13.95	4.29	337.5	304889	7	6	0	13.03	491	4559
>sp|Q9CQQ7|AT5F1_MOUSE ATP synthase subunit b, mitochondrial OS=Mus musculus GN=Atp5f1 PE=1 SV=1	13.9	4.53	354.4	560455	7	6	1	17.58	256	1570
>sp|P60710|ACTB_MOUSE Actin, cytoplasmic 1 OS=Mus musculus GN=Actb PE=1 SV=1	13.69	4.47	393	249145	5	5	1	15.47	375	400
>sp|P63260|ACTG_MOUSE Actin, cytoplasmic 2 OS=Mus musculus GN=Actg1 PE=1 SV=1
>sp|Q9JLT4|TRXR2_MOUSE Thioredoxin reductase 2, mitochondrial OS=Mus musculus GN=Txnrd2 PE=1 SV=4	13.18	4.44	321.2	361402	7	6	1	13.17	524	22300
>sp|P20852|CP2A5_MOUSE Cytochrome P450 2A5 OS=Mus musculus GN=Cyp2a5 PE=2 SV=1	13.11	4.6	432.5	176361	8	7	1	14.57	494	4569
>sp|P08249|MDHM_MOUSE Malate dehydrogenase, mitochondrial OS=Mus musculus GN=Mdh2 PE=1 SV=3	13.1	4.73	328	116698	4	3	0	12.13	338	12516
>sp|P53657|KPYR_MOUSE Pyruvate kinase isozymes R/L OS=Mus musculus GN=Pklr PE=2 SV=1	12.88	5.37	346.4	386611	7	6	0	10.63	574	11246
>sp|P20108|PRDX3_MOUSE Thioredoxin-dependent peroxide reductase, mitochondrial OS=Mus musculus GN=Prdx3 PE=1 SV=1	12.62	4.24	380.5	336587	7	5	1	18.68	257	16430
>sp|P47740|AL3A2_MOUSE Fatty aldehyde dehydrogenase OS=Mus musculus GN=Aldh3a2 PE=2 SV=2	12.58	3.75	249.2	271210	7	7	0	16.32	484	763
>sp|Q8C5H8|NAKD1_MOUSE NAD kinase domain-containing protein 1 OS=Mus musculus GN=Nadkd1 PE=1 SV=2	12.57	4.15	315.1	163702	4	4	0	9.96	452	13605
>sp|Q8C5H8-2|NAKD1_MOUSE Isoform 2 of NAD kinase domain-containing protein 1 OS=Mus musculus GN=Nadkd1
>sp|Q8C5H8-3|NAKD1_MOUSE Isoform 3 of NAD kinase domain-containing protein 1 OS=Mus musculus GN=Nadkd1
>sp|Q8C5H8-4|NAKD1_MOUSE Isoform 4 of NAD kinase domain-containing protein 1 OS=Mus musculus GN=Nadkd1
>sp|Q07417|ACADS_MOUSE Short-chain specific acyl-CoA dehydrogenase, mitochondrial OS=Mus musculus GN=Acads PE=2 SV=2	12.43	4.1	362.3	130325	5	5	2	14.56	412	260
>sp|Q8VCM8|NCLN_MOUSE Nicalin OS=Mus musculus GN=Ncln PE=2 SV=2	12.35	4.37	269.1	233521	4	4	0	8.17	563	13729
>sp|K1C15_SHEEP|(Common contaminant protein)	12.33	3.55	363.6	592867	5	4	1	6.18	453	24151
>sp|P19221|THRB_MOUSE Prothrombin OS=Mus musculus GN=F2 PE=1 SV=1	11.98	3.48	281.3	569419	9	8	0	13.27	618	21342
>sp|Q9D7B6|ACAD8_MOUSE Isobutyryl-CoA dehydrogenase, mitochondrial OS=Mus musculus GN=Acad8 PE=2 SV=2	11.71	4.03	350.3	287083	7	7	3	15.98	413	256
>sp|Q922U2|K2C5_MOUSE Keratin, type II cytoskeletal 5 OS=Mus musculus GN=Krt5 PE=1 SV=1	11.59	4.41	431.2	373967	7	7	2	8.28	580	10703
>sp|P00405|COX2_MOUSE Cytochrome c oxidase subunit 2 OS=Mus musculus GN=Mtco2 PE=1 SV=1	11.52	4.51	369.9	994509	4	4	2	11.89	227	4494
>sp|O35488|S27A2_MOUSE Very long-chain acyl-CoA synthetase OS=Mus musculus GN=Slc27a2 PE=1 SV=2	11.4	5.07	222.1	119219	5	4	0	7.9	620	18495
>sp|Q9QXE0|HACL1_MOUSE 2-hydroxyacyl-CoA lyase 1 OS=Mus musculus GN=Hacl1 PE=1 SV=2	11.24	4.17	341	250251	6	6	0	9.29	581	9039
>sp|P01869|IGH1M_MOUSE Ig gamma-1 chain C region, membrane-bound form OS=Mus musculus GN=Ighg1 PE=1 SV=2	11.12	4.3	426.2	170796	3	3	0	8.4	393	9913
>sp|P01868|IGHG1_MOUSE Ig gamma-1 chain C region secreted form OS=Mus musculus GN=Ighg1 PE=1 SV=1
>sp|Q64458|CP2CT_MOUSE Cytochrome P450 2C29 OS=Mus musculus GN=Cyp2c29 PE=1 SV=2	10.97	3.66	300.3	406732	8	7	0	13.27	490	4575
>sp|Q8BG07|PLD4_MOUSE Phospholipase D4 OS=Mus musculus GN=Pld4 PE=2 SV=1	10.93	3.31	267.6	176560	5	5	1	9.94	503	15967
>sp|Q8BG07-2|PLD4_MOUSE Isoform 2 of Phospholipase D4 OS=Mus musculus GN=Pld4
>sp|Q64464|CP3AD_MOUSE Cytochrome P450 3A13 OS=Mus musculus GN=Cyp3a13 PE=2 SV=1	10.61	4.49	357	180875	4	4	1	8.35	503	4592
>sp|Q8K0E8|FIBB_MOUSE Fibrinogen beta chain OS=Mus musculus GN=Fgb PE=2 SV=1	10.35	3.8	396.8	559946	9	7	1	17.67	481	7600
>sp|Q8R123|FAD1_MOUSE FAD synthase OS=Mus musculus GN=Flad1 PE=1 SV=1	10.25	3.32	261	243932	5	5	0	10.37	492	7276
>sp|Q61425|HCDH_MOUSE Hydroxyacyl-coenzyme A dehydrogenase, mitochondrial OS=Mus musculus GN=Hadh PE=1 SV=2	10.2	2.88	306.8	506442	6	6	1	13.06	314	9109
>sp|Q9WTP6|KAD2_MOUSE Adenylate kinase 2, mitochondrial OS=Mus musculus GN=Ak2 PE=1 SV=5	10.19	4.06	331.2	294661	7	5	0	21.34	239	10724
>sp|Q9WTP6-2|KAD2_MOUSE Isoform 2 of Adenylate kinase 2, mitochondrial OS=Mus musculus GN=Ak2
>sp|Q9D880|TIM50_MOUSE Mitochondrial import inner membrane translocase subunit TIM50 OS=Mus musculus GN=Timm50 PE=1 SV=1	10.01	5.48	304	189204	4	3	0	11.05	353	21402
>sp|P50446|K2C6A_MOUSE Keratin, type II cytoskeletal 6A OS=Mus musculus GN=Krt6a PE=2 SV=3	9.84	4.35	323.9	131999	3	3	0	5.61	553	10704
>sp|Q9DCW4|ETFB_MOUSE Electron transfer flavoprotein subunit beta OS=Mus musculus GN=Etfb PE=1 SV=3	9.8	4.34	257.8	166306	5	5	0	23.14	255	6820
>sp|P97807|FUMH_MOUSE Fumarate hydratase, mitochondrial OS=Mus musculus GN=Fh PE=1 SV=3	9.6	5.84	465.1	118391	3	2	0	5.33	507	7908
>sp|P97807-2|FUMH_MOUSE Isoform Cytoplasmic of Fumarate hydratase, mitochondrial OS=Mus musculus GN=Fh
>sp|Q9EP89|LACTB_MOUSE Serine beta-lactamase-like protein LACTB, mitochondrial OS=Mus musculus GN=Lactb PE=1 SV=1	9.48	4.17	249.9	165062	5	5	0	8.89	551	11426
>sp|Q9JMA7|CP341_MOUSE Cytochrome P450 3A41 OS=Mus musculus GN=Cyp3a41a PE=2 SV=2	9.34	3.71	292.5	364402	7	5	1	9.92	504	4589
>sp|Q791V5|MTCH2_MOUSE Mitochondrial carrier homolog 2 OS=Mus musculus GN=Mtch2 PE=1 SV=1	9.32	3.57	261.8	374038	6	5	1	18.81	303	13270
>sp|P17717|UDB17_MOUSE UDP-glucuronosyltransferase 2B17 OS=Mus musculus GN=Ugt2b17 PE=2 SV=1	9.06	4.13	411.1	395631	5	5	0	8.11	530	22854
>sp|Q8BJ64|CHDH_MOUSE Choline dehydrogenase, mitochondrial OS=Mus musculus GN=Chdh PE=1 SV=1	9.02	2.35	324.9	343108	7	6	0	9.06	596	3672
>sp|O35423|SPYA_MOUSE Serine--pyruvate aminotransferase, mitochondrial OS=Mus musculus GN=Agxt PE=1 SV=2	8.97	4.46	322.6	265632	4	4	1	9.44	413	20097
>sp|O35423-2|SPYA_MOUSE Isoform Peroxisomal of Serine--pyruvate aminotransferase, mitochondrial OS=Mus musculus GN=Agxt
>sp|Q8BFR5|EFTU_MOUSE Elongation factor Tu, mitochondrial OS=Mus musculus GN=Tufm PE=1 SV=1	8.73	4.26	310	146042	3	3	0	5.31	452	6401
>sp|Q8BFR5-2|EFTU_MOUSE Isoform 2 of Elongation factor Tu, mitochondrial OS=Mus musculus GN=Tufm
>sp|Q9DB77|QCR2_MOUSE Cytochrome b-c1 complex subunit 2, mitochondrial OS=Mus musculus GN=Uqcrc2 PE=1 SV=1	8.69	4.27	318.1	253204	4	4	0	9.49	453	16899
>sp|Q8BH95|ECHM_MOUSE Enoyl-CoA hydratase, mitochondrial OS=Mus musculus GN=Echs1 PE=1 SV=1	8.64	4.19	307.6	239610	5	4	1	13.79	290	6302
>sp|Q8CC88|K0564_MOUSE Uncharacterized protein KIAA0564 homolog OS=Mus musculus GN=Kiaa0564 PE=2 SV=2	8.62	3.95	283.1	255830	7	6	1	3.31	1905	10530
>sp|Q9Z2Z6|MCAT_MOUSE Mitochondrial carnitine/acylcarnitine carrier protein OS=Mus musculus GN=Slc25a20 PE=1 SV=1	8.06	4.27	370.2	178125	4	4	0	15.28	301	12444
>sp|Q99L13|3HIDH_MOUSE 3-hydroxyisobutyrate dehydrogenase, mitochondrial OS=Mus musculus GN=Hibadh PE=2 SV=1	8	4.43	294.4	78109.8	3	3	0	9.85	335	42
>sp|P56480|ATPB_MOUSE ATP synthase subunit beta, mitochondrial OS=Mus musculus GN=Atp5b PE=1 SV=2	7.77	4.2	297.8	91377	3	3	0	7.18	529	1672
>sp|Q60936-2|ADCK3_MOUSE Isoform 2 of Chaperone activity of bc1 complex-like, mitochondrial OS=Mus musculus GN=Adck3	7.72	4.42	347.8	60625.6	2	2	0	5.42	369	506
>sp|Q91YT0|NDUV1_MOUSE NADH dehydrogenase [ubiquinone] flavoprotein 1, mitochondrial OS=Mus musculus GN=Ndufv1 PE=1 SV=1	7.53	3.55	253.3	150439	3	3	0	6.47	464	13831
>sp|Q8BH59|CMC1_MOUSE Calcium-binding mitochondrial carrier protein Aralar1 OS=Mus musculus GN=Slc25a12 PE=1 SV=1	7.39	4.08	266.8	104038	3	2	0	3.25	677	4134
>sp|P42125|ECI1_MOUSE Enoyl-CoA delta isomerase 1, mitochondrial OS=Mus musculus GN=Eci1 PE=2 SV=1	7.31	5.23	286.4	154163	3	3	0	13.49	289	6304
>sp|Q9CQ62|DECR_MOUSE 2,4-dienoyl-CoA reductase, mitochondrial OS=Mus musculus GN=Decr1 PE=1 SV=1	7.31	3.97	456.5	191658	3	2	0	6.57	335	5473
>sp|Q99JR1|SFXN1_MOUSE Sideroflexin-1 OS=Mus musculus GN=Sfxn1 PE=1 SV=3	7.28	4.4	311.9	201028	5	5	0	18.32	322	19117
>sp|P55096|ABCD3_MOUSE ATP-binding cassette sub-family D member 3 OS=Mus musculus GN=Abcd3 PE=1 SV=2	7.16	3.6	292.7	129444	3	3	1	4.7	659	179
>sp|Q9DCU9|HOGA1_MOUSE Probable 4-hydroxy-2-oxoglutarate aldolase, mitochondrial OS=Mus musculus GN=Hoga1 PE=1 SV=1	7.1	3.75	265.3	129961	3	3	0	9.97	321	9394
>sp|P11499|HS90B_MOUSE Heat shock protein HSP 90-beta OS=Mus musculus GN=Hsp90ab1 PE=1 SV=3	7.07	5.31	353.6	75155.1	2	2	0	5.66	724	9476
>sp|Q9Z2I8|SUCB2_MOUSE Succinyl-CoA ligase [GDP-forming] subunit beta, mitochondrial OS=Mus musculus GN=Suclg2 PE=2 SV=3	7	3.63	267.8	55886.4	3	3	0	8.08	433	20453
>sp|Q9Z2I8-2|SUCB2_MOUSE Isoform 2 of Succinyl-CoA ligase [GDP-forming] subunit beta, mitochondrial OS=Mus musculus GN=Suclg2
>sp|P14211|CALR_MOUSE Calreticulin OS=Mus musculus GN=Calr PE=1 SV=1	7	4.29	364.7	207799	6	5	0	13.46	416	2532
>sp|Q8VCR2|DHB13_MOUSE 17-beta-hydroxysteroid dehydrogenase 13 OS=Mus musculus GN=Hsd17b13 PE=1 SV=1	6.96	2.78	307.7	93490.3	3	3	0	10.2	304	5613
>sp|Q8VCR2-2|DHB13_MOUSE Isoform 2 of 17-beta-hydroxysteroid dehydrogenase 13 OS=Mus musculus GN=Hsd17b13
>sp|Q91VR2|ATPG_MOUSE ATP synthase subunit gamma, mitochondrial OS=Mus musculus GN=Atp5c1 PE=1 SV=1	6.59	3.87	329	194714	6	5	2	26.85	298	1676
>sp|P97501|FMO3_MOUSE Dimethylaniline monooxygenase [N-oxide-forming] 3 OS=Mus musculus GN=Fmo3 PE=1 SV=1	6.53	4.87	236.1	71167	3	2	0	4.49	534	7691
>sp|Q99MZ7|PECR_MOUSE Peroxisomal trans-2-enoyl-CoA reductase OS=Mus musculus GN=Pecr PE=2 SV=1	6.45	5.57	243.2	108444	3	3	0	10.89	303	15453
>sp|O35490|BHMT1_MOUSE Betaine--homocysteine S-methyltransferase 1 OS=Mus musculus GN=Bhmt PE=2 SV=1	6.45	3.05	372	171035	3	3	0	6.39	407	2008
>sp|Q80XN0|BDH_MOUSE D-beta-hydroxybutyrate dehydrogenase, mitochondrial OS=Mus musculus GN=Bdh1 PE=1 SV=2	6.3	4.27	306	151538	4	4	0	9.91	343	1962
>sp|Q8JZN5|ACAD9_MOUSE Acyl-CoA dehydrogenase family member 9, mitochondrial OS=Mus musculus GN=Acad9 PE=2 SV=2	6.15	3.98	268.4	130603	4	4	1	5.92	625	257
>sp|Q9D2G2|ODO2_MOUSE Dihydrolipoyllysine-residue succinyltransferase component of 2-oxoglutarate dehydrogenase complex, mitochondrial OS=Mus musculus GN=Dlst PE=1 SV=1	6.13	4.41	243	76764	3	3	0	6.39	454	14674
>sp|Q9D2G2-2|ODO2_MOUSE Isoform 2 of Dihydrolipoyllysine-residue succinyltransferase component of 2-oxoglutarate dehydrogenase complex, mitochondrial OS=Mus musculus GN=Dlst
>sp|P19783|COX41_MOUSE Cytochrome c oxidase subunit 4 isoform 1, mitochondrial OS=Mus musculus GN=Cox4i1 PE=1 SV=2	6.08	3.25	313	155403	2	2	0	12.43	169	4496
>sp|P08730|K1C13_MOUSE Keratin, type I cytoskeletal 13 OS=Mus musculus GN=Krt13 PE=1 SV=2	6.06	3.14	345.2	336181	4	3	0	6.18	437	10665
>sp|Q60759|GCDH_MOUSE Glutaryl-CoA dehydrogenase, mitochondrial OS=Mus musculus GN=Gcdh PE=2 SV=2	6.05	4.92	477.9	119803	3	2	0	5.94	438	8163
>sp|Q9ET01|PYGL_MOUSE Glycogen phosphorylase, liver form OS=Mus musculus GN=Pygl PE=1 SV=4	6.04	3.29	296.3	144307	4	4	0	4.82	850	16881
>sp|P47758|SRPRB_MOUSE Signal recognition particle receptor subunit beta OS=Mus musculus GN=Srprb PE=1 SV=1	5.99	2.7	241.2	108770	3	3	0	10.04	269	20163
>sp|Q9DD20|MET7B_MOUSE Methyltransferase-like protein 7B OS=Mus musculus GN=Mettl7b PE=2 SV=2	5.97	4.24	245	339948	6	5	1	18.44	244	12651
>sp|A2ATU0|DHTK1_MOUSE Probable 2-oxoglutarate dehydrogenase E1 component DHKTD1, mitochondrial OS=Mus musculus GN=Dhtkd1 PE=2 SV=1	5.96	5.22	249.1	186365	4	4	2	3.8	921	5647
>sp|Q60932|VDAC1_MOUSE Voltage-dependent anion-selective channel protein 1 OS=Mus musculus GN=Vdac1 PE=1 SV=3	5.9	3.98	243.8	89913.5	3	3	0	9.8	296	23091
>sp|Q60932-2|VDAC1_MOUSE Isoform Mt-VDAC1 of Voltage-dependent anion-selective channel protein 1 OS=Mus musculus GN=Vdac1
>sp|Q99J39|DCMC_MOUSE Malonyl-CoA decarboxylase, mitochondrial OS=Mus musculus GN=Mlycd PE=2 SV=1	5.82	2.97	267	137192	3	3	0	6.3	492	5374
>sp|Q99J39-2|DCMC_MOUSE Isoform Cytoplasmic+peroxisomal of Malonyl-CoA decarboxylase, mitochondrial OS=Mus musculus GN=Mlycd
>sp|Q8VEM8|MPCP_MOUSE Phosphate carrier protein, mitochondrial OS=Mus musculus GN=Slc25a3 PE=1 SV=1	5.77	3.72	336	79089.5	2	2	0	6.16	357	13081
>sp|P58710|GGLO_MOUSE L-gulonolactone oxidase OS=Mus musculus GN=Gulo PE=1 SV=3	5.76	3.9	265.7	85739.3	3	2	0	4.55	440	8278
>sp|Q9JHI5|IVD_MOUSE Isovaleryl-CoA dehydrogenase, mitochondrial OS=Mus musculus GN=Ivd PE=1 SV=1	5.64	4	254.4	146021	3	3	1	7.08	424	10421
>sp|Q91ZJ5|UGPA_MOUSE UTP--glucose-1-phosphate uridylyltransferase OS=Mus musculus GN=Ugp2 PE=2 SV=3	5.61	3.97	391.4	131593	3	3	0	5.12	508	22874
>sp|Q91ZJ5-2|UGPA_MOUSE Isoform 2 of UTP--glucose-1-phosphate uridylyltransferase OS=Mus musculus GN=Ugp2
>sp|P63101|1433Z_MOUSE 14-3-3 protein zeta/delta OS=Mus musculus GN=Ywhaz PE=1 SV=1	5.59	5.3	305.8	68960.7	2	2	0	8.57	245	9
>sp|Q8R086|SUOX_MOUSE Sulfite oxidase, mitochondrial OS=Mus musculus GN=Suox PE=1 SV=2	5.55	3.66	235.8	122303	2	2	0	3.85	546	20483
>sp|Q8QZS1|HIBCH_MOUSE 3-hydroxyisobutyryl-CoA hydrolase, mitochondrial OS=Mus musculus GN=Hibch PE=1 SV=1	5.42	2.24	227.9	132979	4	4	0	10.39	385	9252
>sp|P23780|BGAL_MOUSE Beta-galactosidase OS=Mus musculus GN=Glb1 PE=2 SV=1	5.41	3.66	297.9	119591	4	4	0	6.18	647	1997
>sp|Q99JY0|ECHB_MOUSE Trifunctional enzyme subunit beta, mitochondrial OS=Mus musculus GN=Hadhb PE=1 SV=1	5.34	4.36	361.8	55201.4	2	2	0	4.63	475	6295
>sp|Q9CZU6|CISY_MOUSE Citrate synthase, mitochondrial OS=Mus musculus GN=Cs PE=1 SV=1	5.27	2.75	223.4	96864.1	3	3	0	6.03	464	3812
>sp|Q9CW42|MOSC1_MOUSE MOSC domain-containing protein 1, mitochondrial OS=Mus musculus GN=Marc1 PE=1 SV=2	5.27	4.19	291.3	106378	3	3	0	9.12	340	13042
>sp|Q61781|K1C14_MOUSE Keratin, type I cytoskeletal 14 OS=Mus musculus GN=Krt14 PE=1 SV=2	5.23	2.87	288.8	225588	4	4	1	11.36	484	10667
>sp|O08601|MTP_MOUSE Microsomal triglyceride transfer protein large subunit OS=Mus musculus GN=Mttp PE=2 SV=2	5.19	4.03	338.2	69305.8	3	3	0	3.91	894	13326
>sp|O08601-2|MTP_MOUSE Isoform 2 of Microsomal triglyceride transfer protein large subunit OS=Mus musculus GN=Mttp
>sp|P50172|DHI1_MOUSE Corticosteroid 11-beta-dehydrogenase isozyme 1 OS=Mus musculus GN=Hsd11b1 PE=1 SV=3	5.12	2.66	248.2	119942	4	3	0	9.59	292	5630
>sp|Q60597|ODO1_MOUSE 2-oxoglutarate dehydrogenase, mitochondrial OS=Mus musculus GN=Ogdh PE=1 SV=3	5.11	2.43	254.7	100712	3	3	0	2.93	1023	14670
>sp|Q61941|NNTM_MOUSE NAD(P) transhydrogenase, mitochondrial OS=Mus musculus GN=Nnt PE=1 SV=2	5.1	2.67	203.2	257192	5	5	0	4.6	1086	14157
>sp|P10107|ANXA1_MOUSE Annexin A1 OS=Mus musculus GN=Anxa1 PE=1 SV=2	4.84	4.26	255.2	104717	3	2	0	5.49	346	1062
>sp|Q8VCC2|EST1_MOUSE Liver carboxylesterase 1 OS=Mus musculus GN=Ces1 PE=2 SV=1	4.81	3.93	270.7	80879.7	3	3	0	5.66	565	6801
>sp|Q9DBK0|ACO12_MOUSE Acyl-coenzyme A thioesterase 12 OS=Mus musculus GN=Acot12 PE=2 SV=1	4.68	3.82	250.5	133995	3	3	1	13.31	556	345
>sp|P01027|CO3_MOUSE Complement C3 OS=Mus musculus GN=C3 PE=1 SV=3	4.61	3.08	205.2	326434	6	6	0	3.85	1663	4329
>sp|Q9QXC1|FETUB_MOUSE Fetuin-B OS=Mus musculus GN=Fetub PE=1 SV=1	4.57	2.04	130.9	119921	3	3	0	10.82	388	7506
>sp|Q91W64|CP270_MOUSE Cytochrome P450 2C70 OS=Mus musculus GN=Cyp2c70 PE=2 SV=2	4.56	2.95	203.8	125861	3	3	0	6.95	489	4565
>sp|Q99LJ1|FUCO_MOUSE Tissue alpha-L-fucosidase OS=Mus musculus GN=Fuca1 PE=2 SV=1	4.54	2.44	308.8	177521	4	3	0	5.75	452	7906
>sp|Q9WU79|PROD_MOUSE Proline dehydrogenase 1, mitochondrial OS=Mus musculus GN=Prodh PE=2 SV=2	4.54	1.76	207.5	213022	7	6	1	7.01	599	16488
>sp|Q8R4H7-2|NAGS_MOUSE Isoform 2 of N-acetylglutamate synthase, mitochondrial OS=Mus musculus GN=Nags	4.5	2.6	208.1	311773	3	3	0	9.24	368	13600
>sp|Q99MD6|TRXR3_MOUSE Thioredoxin reductase 3 (Fragment) OS=Mus musculus GN=Txnrd3 PE=1 SV=2	4.49	2.23	237.8	317924	6	4	0	5.45	697	22304
>sp|P56654|CP237_MOUSE Cytochrome P450 2C37 OS=Mus musculus GN=Cyp2c37 PE=2 SV=2	4.47	2.47	234	169815	6	4	2	7.55	490	4556
>sp|P07744|K2C4_MOUSE Keratin, type II cytoskeletal 4 OS=Mus musculus GN=Krt4 PE=1 SV=2	4.44	2.73	247.2	247526	5	5	1	6.48	525	10702
>sp|Q9CY50|SSRA_MOUSE Translocon-associated protein subunit alpha OS=Mus musculus GN=Ssr1 PE=1 SV=1	4.38	4.23	308	88910.9	2	2	0	6.64	286	20239
>sp|Q91W43|GCSP_MOUSE Glycine dehydrogenase [decarboxylating], mitochondrial OS=Mus musculus GN=Gldc PE=1 SV=1	4.37	3.51	194.7	145159	4	4	1	4.39	1025	8193
>sp|Q91VS7|MGST1_MOUSE Microsomal glutathione S-transferase 1 OS=Mus musculus GN=Mgst1 PE=1 SV=3	4.27	4.28	310.8	99276.6	2	2	0	10.32	155	12748
>sp|P19536|COX5B_MOUSE Cytochrome c oxidase subunit 5B, mitochondrial OS=Mus musculus GN=Cox5b PE=1 SV=1	4.27	4.26	240.7	67297.1	2	1	0	9.37	128	4499
>sp|Q99PL5|RRBP1_MOUSE Ribosome-binding protein 1 OS=Mus musculus GN=Rrbp1 PE=2 SV=2	4.26	4.15	267.2	1.11993e+06	7	5	1	2.93	1605	18123
>sp|Q9DBM2|ECHP_MOUSE Peroxisomal bifunctional enzyme OS=Mus musculus GN=Ehhadh PE=1 SV=4	4.24	4.3	281.4	80368.7	2	2	0	2.92	718	6303
>sp|Q9DCM0|ETHE1_MOUSE Protein ETHE1, mitochondrial OS=Mus musculus GN=Ethe1 PE=1 SV=2	4.23	3.37	265.5	65294.6	2	2	0	7.48	254	6822
>sp|Q8VCZ9|PROD2_MOUSE Probable proline dehydrogenase 2 OS=Mus musculus GN=Prodh2 PE=2 SV=1	4.17	2.53	222.3	59596.2	2	2	0	4.82	456	16487
>sp|Q9R0H5|K2C71_MOUSE Keratin, type II cytoskeletal 71 OS=Mus musculus GN=Krt71 PE=1 SV=1	4.16	4.2	433.3	122355	1	1	0	1.91	524	10706
>sp|Q8JZZ0|UD3A2_MOUSE UDP-glucuronosyltransferase 3A2 OS=Mus musculus GN=Ugt3a2 PE=2 SV=2	4.15	2.91	390.5	146673	3	3	0	3.25	523	22853
>sp|O09159|MA2B1_MOUSE Lysosomal alpha-mannosidase OS=Mus musculus GN=Man2b1 PE=2 SV=4	4.14	4.22	344.7	17675.7	1	1	0	1.28	1013	12186
>sp|Q91XE0|GLYAT_MOUSE Glycine N-acyltransferase OS=Mus musculus GN=Glyat PE=1 SV=1	4.14	2.62	257.3	43275.9	2	2	0	6.08	296	8424
>sp|Q91XE0-2|GLYAT_MOUSE Isoform 2 of Glycine N-acyltransferase OS=Mus musculus GN=Glyat
>sp|Q8BH86-2|CN159_MOUSE Isoform 2 of UPF0317 protein C14orf159 homolog, mitochondrial OS=Mus musculus	4.14	3.22	204.2	50642.6	2	2	0	4.04	570	4179
>sp|O35405|PLD3_MOUSE Phospholipase D3 OS=Mus musculus GN=Pld3 PE=2 SV=1	4.11	4.15	245.1	25845.2	1	1	0	2.46	488	15966
>sp|O08756|HCD2_MOUSE 3-hydroxyacyl-CoA dehydrogenase type-2 OS=Mus musculus GN=Hsd17b10 PE=1 SV=4	4.06	3.7	152.8	43874	4	3	0	17.24	261	9108
>sp|Q8K0C4|CP51A_MOUSE Lanosterol 14-alpha demethylase OS=Mus musculus GN=Cyp51a1 PE=2 SV=1	4.06	1.85	209.6	136414	5	4	0	7.95	503	4603
>sp|Q7TNG8|LDHD_MOUSE Probable D-lactate dehydrogenase, mitochondrial OS=Mus musculus GN=Ldhd PE=1 SV=1	3.98	4.02	230.2	21520.2	1	1	0	2.48	484	11555
>sp|Q9QXD1|ACOX2_MOUSE Peroxisomal acyl-coenzyme A oxidase 2 OS=Mus musculus GN=Acox2 PE=1 SV=2	3.96	3.84	265.7	739338	2	2	0	1.91	681	362
>sp|P24549|AL1A1_MOUSE Retinal dehydrogenase 1 OS=Mus musculus GN=Aldh1a1 PE=1 SV=5	3.94	2.09	237.9	127734	3	3	1	5.79	501	750
>sp|Q9D3R5|F187A_MOUSE Ig-like V-type domain-containing protein FAM187A OS=Mus musculus GN=Fam187a PE=2 SV=1	3.86	3.84	292.9	232026	4	1	0	1.44	417	7066
>sp|Q9ESB3|HRG_MOUSE Histidine-rich glycoprotein OS=Mus musculus GN=Hrg PE=1 SV=2	3.86	3.46	232.7	110407	2	2	0	3.05	525	9448
>sp|P01864|GCAB_MOUSE Ig gamma-2A chain C region secreted form OS=Mus musculus PE=1 SV=1	3.81	3.84	176.9	6650.8	1	1	0	4.78	335	8159
>sp|P32921|SYWC_MOUSE Tryptophan--tRNA ligase, cytoplasmic OS=Mus musculus GN=Wars PE=1 SV=2	3.79	3.27	197.1	87630.6	3	2	0	5.2	481	20685
>sp|P32921-2|SYWC_MOUSE Isoform 2 of Tryptophan--tRNA ligase, cytoplasmic OS=Mus musculus GN=Wars
>sp|Q9WVD5|ORNT1_MOUSE Mitochondrial ornithine transporter 1 OS=Mus musculus GN=Slc25a15 PE=2 SV=1	3.76	3.5	250.5	97545.4	2	2	0	5.32	301	14832
>sp|Q60930|VDAC2_MOUSE Voltage-dependent anion-selective channel protein 2 OS=Mus musculus GN=Vdac2 PE=1 SV=2	3.76	3.75	242.6	61914.4	2	2	0	5.42	295	23093
>sp|P29758|OAT_MOUSE Ornithine aminotransferase, mitochondrial OS=Mus musculus GN=Oat PE=1 SV=1	3.75	2.33	159.8	34498.9	2	2	0	6.83	439	14624
>sp|Q9D7J9|ECHD3_MOUSE Enoyl-CoA hydratase domain-containing protein 3, mitochondrial OS=Mus musculus GN=Echdc3 PE=2 SV=1	3.67	3.67	315.9	215145	2	1	0	2.67	300	6301
>sp|Q9DBF1-2|AL7A1_MOUSE Isoform 2 of Alpha-aminoadipic semialdehyde dehydrogenase OS=Mus musculus GN=Aldh7a1	3.65	3.69	137	6429.1	1	1	1	3.33	511	768
>sp|Q8BHN3|GANAB_MOUSE Neutral alpha-glucosidase AB OS=Mus musculus GN=Ganab PE=1 SV=1	3.61	2.82	243.7	321805	4	3	0	2.86	944	8060
>sp|Q8BHN3-2|GANAB_MOUSE Isoform 2 of Neutral alpha-glucosidase AB OS=Mus musculus GN=Ganab
>sp|Q8BHN3-3|GANAB_MOUSE Isoform 3 of Neutral alpha-glucosidase AB OS=Mus musculus GN=Ganab
>sp|Q9D379|HYEP_MOUSE Epoxide hydrolase 1 OS=Mus musculus GN=Ephx1 PE=1 SV=2	3.56	1.14	243.3	188146	5	5	0	9.45	455	9667
>sp|Q9D0M3|CY1_MOUSE Cytochrome c1, heme protein, mitochondrial OS=Mus musculus GN=Cyc1 PE=1 SV=1	3.52	2.56	194.3	126248	4	2	0	7.69	325	5189
>sp|P52825|CPT2_MOUSE Carnitine O-palmitoyltransferase 2, mitochondrial OS=Mus musculus GN=Cpt2 PE=1 SV=2	3.52	3.56	255.4	86144.6	2	2	0	2.28	658	4656
>sp|Q9QYR7|ACOT3_MOUSE Acyl-coenzyme A thioesterase 3 OS=Mus musculus GN=Acot3 PE=2 SV=1	3.48	3.52	242.4	32153.3	1	1	0	2.78	432	353
>sp|Q9QYR7-2|ACOT3_MOUSE Isoform 2 of Acyl-coenzyme A thioesterase 3 OS=Mus musculus GN=Acot3
>sp|O70475|UGDH_MOUSE UDP-glucose 6-dehydrogenase OS=Mus musculus GN=Ugdh PE=1 SV=1	3.44	3.48	289.5	33794.9	1	1	0	2.03	493	22872
>sp|Q3URE1|ACSF3_MOUSE Acyl-CoA synthetase family member 3, mitochondrial OS=Mus musculus GN=Acsf3 PE=2 SV=2	3.4	3.02	320.4	171561	3	3	0	4.46	583	374
>sp|Q8VCH0|THIKB_MOUSE 3-ketoacyl-CoA thiolase B, peroxisomal OS=Mus musculus GN=Acaa1b PE=2 SV=1	3.33	2.6	215	85941.9	2	2	0	4.95	424	21318
>sp|Q91XE8|TM205_MOUSE Transmembrane protein 205 OS=Mus musculus GN=Tmem205 PE=1 SV=1	3.32	3.34	113.9	7111.1	1	1	0	8.99	189	21575
>sp|P53395|ODB2_MOUSE Lipoamide acyltransferase component of branched-chain alpha-keto acid dehydrogenase complex, mitochondrial OS=Mus musculus GN=Dbt PE=2 SV=2	3.32	2.45	210.6	87004.5	3	3	0	5.81	482	14650
>sp|P01867-2|IGG2B_MOUSE Isoform 2 of Ig gamma-2B chain C region OS=Mus musculus GN=Igh-3	3.32	2.98	237.3	228752	3	3	1	10.15	335	9912
>sp|Q99LP6|GRPE1_MOUSE GrpE protein homolog 1, mitochondrial OS=Mus musculus GN=Grpel1 PE=1 SV=1	3.31	3.24	272.7	148678	3	3	1	6.45	217	8807
>sp|Q922Q8|LRC59_MOUSE Leucine-rich repeat-containing protein 59 OS=Mus musculus GN=Lrrc59 PE=2 SV=1	3.3	2.9	228.3	115158	3	3	0	8.14	307	11903
>sp|Q9R092|H17B6_MOUSE 17-beta-hydroxysteroid dehydrogenase type 6 OS=Mus musculus GN=Hsd17b6 PE=2 SV=1	3.25	3.28	416.9	152080	1	1	0	2.84	317	8951
>sp|P02535|K1C10_MOUSE Keratin, type I cytoskeletal 10 OS=Mus musculus GN=Krt10 PE=1 SV=3	3.25	3.3	287.9	62616	1	1	0	1.58	570	10660
>sp|P02535-2|K1C10_MOUSE Isoform 2 of Keratin, type I cytoskeletal 10 OS=Mus musculus GN=Krt10
>sp|P02535-3|K1C10_MOUSE Isoform 3 of Keratin, type I cytoskeletal 10 OS=Mus musculus GN=Krt10
>sp|P27786|CP17A_MOUSE Steroid 17-alpha-hydroxylase/17,20 lyase OS=Mus musculus GN=Cyp17a1 PE=2 SV=1	3.22	3.26	145.4	6601.9	1	1	0	2.76	507	4549
>sp|P08003|PDIA4_MOUSE Protein disulfide-isomerase A4 OS=Mus musculus GN=Pdia4 PE=1 SV=3	3.18	1.5	240.6	136418	4	4	1	6.74	638	15383
>sp|Q64133|AOFA_MOUSE Amine oxidase [flavin-containing] A OS=Mus musculus GN=Maoa PE=1 SV=3	3.17	2.81	279.9	186306	3	3	1	4.75	526	1075
>sp|Q9EQH2|ERAP1_MOUSE Endoplasmic reticulum aminopeptidase 1 OS=Mus musculus GN=Erap1 PE=2 SV=2	3.12	2.77	236.9	150288	4	3	0	2.37	930	6697
>sp|Q9Z2L6|MINP1_MOUSE Multiple inositol polyphosphate phosphatase 1 OS=Mus musculus GN=Minpp1 PE=1 SV=3	3.12	3.16	257.4	44459.1	1	1	0	1.87	481	12817
>sp|P67778|PHB_MOUSE Prohibitin OS=Mus musculus GN=Phb PE=1 SV=1	3.11	2.93	236.6	66304.4	2	2	0	6.99	272	15597
>sp|Q9EP75|CP4FE_MOUSE Leukotriene-B4 omega-hydroxylase 3 OS=Mus musculus GN=Cyp4f14 PE=2 SV=1	3.1	1.38	291.7	69823.9	3	3	0	6.11	524	4601
>sp|Q9CQA3|DHSB_MOUSE Succinate dehydrogenase [ubiquinone] iron-sulfur subunit, mitochondrial OS=Mus musculus GN=Sdhb PE=1 SV=1	2.98	1.23	175.2	113648	3	3	0	10.28	282	5644
>sp|Q9JKR6|HYOU1_MOUSE Hypoxia up-regulated protein 1 OS=Mus musculus GN=Hyou1 PE=1 SV=1	2.93	1.9	201	59241.2	3	3	1	2.6	999	9673
>sp|O55125|NIPS1_MOUSE Protein NipSnap homolog 1 OS=Mus musculus GN=Nipsnap1 PE=1 SV=1	2.9	2.69	280.1	253580	3	2	0	5.99	284	14065
>sp|Q8BL66|EEA1_MOUSE Early endosome antigen 1 OS=Mus musculus GN=Eea1 PE=2 SV=2	2.77	2.48	240.5	262221	2	2	1	0.92	1411	6344
>sp|P62984|RL40_MOUSE Ubiquitin-60S ribosomal protein L40 OS=Mus musculus GN=Uba52 PE=1 SV=2	2.75	2.27	251.6	63817.8	2	2	0	19.53	128	17741
>sp|P62983|RS27A_MOUSE Ubiquitin-40S ribosomal protein S27a OS=Mus musculus GN=Rps27a PE=1 SV=2
>sp|P0CG49|UBB_MOUSE Polyubiquitin-B OS=Mus musculus GN=Ubb PE=1 SV=1
>sp|P0CG50|UBC_MOUSE Polyubiquitin-C OS=Mus musculus GN=Ubc PE=1 SV=2
>sp|UBIQ_HUMAN|(Common contaminant protein)
>Reverse >sp|Q7TT37|ELP1_MOUSE Elongator complex protein 1 OS=Mus musculus GN=Ikbkap PE=2 SV=2	2.72	2.81	289.9	152302	2	1	0	0.9	1333	30743
>sp|Q8C8T7|PPR28_MOUSE Protein phosphatase 1 regulatory subunit 28 OS=Mus musculus GN=Elfn1 PE=2 SV=1	2.69	2.76	221.7	35170.5	1	1	0	1.09	828	16318
>sp|Q9DBN5|LONP2_MOUSE Lon protease homolog 2, peroxisomal OS=Mus musculus GN=Lonp2 PE=2 SV=1	2.68	2.75	103.3	7677.1	1	1	0	1.64	852	11780
>sp|Q9DBN5-2|LONP2_MOUSE Isoform 2 of Lon protease homolog 2, peroxisomal OS=Mus musculus GN=Lonp2
>sp|Q9DBN5-3|LONP2_MOUSE Isoform 3 of Lon protease homolog 2, peroxisomal OS=Mus musculus GN=Lonp2
>sp|Q8VD31|TPSNR_MOUSE Tapasin-related protein OS=Mus musculus GN=Tapbpl PE=2 SV=2	2.67	2.7	223.2	22727	1	1	0	2.44	451	22041
>sp|A2AJN7|S4A11_MOUSE Sodium bicarbonate transporter-like protein 11 OS=Mus musculus GN=Slc4a11 PE=2 SV=1	2.58	2.65	259.5	86989.5	1	1	0	0.93	862	18606
>Reverse >sp|P26039|TLN1_MOUSE Talin-1 OS=Mus musculus GN=Tln1 PE=1 SV=2	2.57	2.75	308.5	142773	3	3	1	1.06	2541	45685
>Reverse >sp|O54826|AF10_MOUSE Protein AF-10 OS=Mus musculus GN=Mllt10 PE=1 SV=2	2.55	2.23	283.5	311112	2	2	1	0.84	1068	24809
>sp|Q0VBL1|TIGD2_MOUSE Tigger transposable element-derived protein 2 OS=Mus musculus GN=Tigd2 PE=2 SV=1	2.52	2.57	251.1	65861.1	1	1	1	1.52	525	21385
>Reverse >sp|P21271|MYO5B_MOUSE Myosin-Vb OS=Mus musculus GN=Myo5b PE=2 SV=2	2.49	2.54	252.3	106278	3	3	1	1.87	1818	37720
>Reverse >sp|P21271-3|MYO5B_MOUSE Isoform 3 of Myosin-Vb OS=Mus musculus GN=Myo5b
>sp|Q9WUM5|SUCA_MOUSE Succinyl-CoA ligase [ADP/GDP-forming] subunit alpha, mitochondrial OS=Mus musculus GN=Suclg1 PE=1 SV=4	2.48	2.51	135.3	10000.6	1	1	0	4.62	346	20451
>sp|P99029|PRDX5_MOUSE Peroxiredoxin-5, mitochondrial OS=Mus musculus GN=Prdx5 PE=1 SV=2	2.48	1.46	210.3	53508.9	2	2	0	9.05	210	16432
>sp|P99029-2|PRDX5_MOUSE Isoform Cytoplasmic+peroxisomal of Peroxiredoxin-5, mitochondrial OS=Mus musculus GN=Prdx5
>sp|Q9DCX2|ATP5H_MOUSE ATP synthase subunit d, mitochondrial OS=Mus musculus GN=Atp5h PE=1 SV=3	2.48	1.51	255.8	109201	2	2	0	12.42	161	1659
>sp|O35459|ECH1_MOUSE Delta(3,5)-Delta(2,4)-dienoyl-CoA isomerase, mitochondrial OS=Mus musculus GN=Ech1 PE=2 SV=1	2.47	2.48	198.4	25941.2	2	1	0	3.36	327	6293
>sp|P80317|TCPZ_MOUSE T-complex protein 1 subunit zeta OS=Mus musculus GN=Cct6a PE=1 SV=3	2.47	1.6	243.4	89174.1	2	2	0	3.39	531	21049
>sp|P70245|EBP_MOUSE 3-beta-hydroxysteroid-Delta(8),Delta(7)-isomerase OS=Mus musculus GN=Ebp PE=1 SV=3	2.44	2.17	170.4	31371.2	2	2	0	10.87	230	6284
>sp|P12791|CP2BA_MOUSE Cytochrome P450 2B10 OS=Mus musculus GN=Cyp2b10 PE=1 SV=1	2.44	1.29	216.9	90340.4	4	4	1	9.6	500	4572
>sp|P12791-2|CP2BA_MOUSE Isoform 2 of Cytochrome P450 2B10 OS=Mus musculus GN=Cyp2b10
>sp|Q8CIM7|CP2DQ_MOUSE Cytochrome P450 2D26 OS=Mus musculus GN=Cyp2d26 PE=1 SV=1	2.39	2.41	156.4	21952.7	2	1	0	2.4	500	4579
>sp|Q3UV55|NR1D1_MOUSE Nuclear receptor subfamily 1 group D member 1 OS=Mus musculus GN=Nr1d1 PE=1 SV=1	2.38	2.41	237.6	104396	2	1	1	1.3	615	14311
>sp|O55022|PGRC1_MOUSE Membrane-associated progesterone receptor component 1 OS=Mus musculus GN=Pgrmc1 PE=1 SV=4	2.36	1.95	183.3	160720	4	3	1	15.38	195	15569
>sp|Q9QYA2|TOM40_MOUSE Mitochondrial import receptor subunit TOM40 homolog OS=Mus musculus GN=Tomm40 PE=1 SV=3	2.36	2.38	270.2	44454.8	1	1	0	2.49	361	21939
>Reverse >sp|Q61083|M3K2_MOUSE Mitogen-activated protein kinase kinase kinase 2 OS=Mus musculus GN=Map3k2 PE=1 SV=2	2.35	2.4	278.7	90331.3	1	1	0	1.29	619	36367
>sp|Q99PG0|AAAD_MOUSE Arylacetamide deacetylase OS=Mus musculus GN=Aadac PE=1 SV=3	2.34	1.29	155.5	69235.6	3	3	0	7.54	398	123
>Reverse >sp|O08648|M3K4_MOUSE Mitogen-activated protein kinase kinase kinase 4 OS=Mus musculus GN=Map3k4 PE=1 SV=2	2.31	1.89	332.5	844813	22	2	0	1	1597	36369
>sp|P54071|IDHP_MOUSE Isocitrate dehydrogenase [NADP], mitochondrial OS=Mus musculus GN=Idh2 PE=1 SV=3	2.27	1.89	223.4	87149.3	3	3	1	5.31	452	9778
>sp|Q9CQH3|NDUB5_MOUSE NADH dehydrogenase [ubiquinone] 1 beta subcomplex subunit 5, mitochondrial OS=Mus musculus GN=Ndufb5 PE=1 SV=1	2.26	2.26	208.2	40706	2	1	0	5.82	189	13812
>sp|P17897|LYZ1_MOUSE Lysozyme C-1 OS=Mus musculus GN=Lyz1 PE=1 SV=1	2.25	2.26	205.1	13935.4	1	1	0	8.11	148	12119
>sp|Q6NXH9|K2C73_MOUSE Keratin, type II cytoskeletal 73 OS=Mus musculus GN=Krt73 PE=1 SV=1	2.17	1.98	259.7	236404	4	3	1	3.53	539	10708
>sp|P15105|GLNA_MOUSE Glutamine synthetase OS=Mus musculus GN=Glul PE=1 SV=6	2.11	1.55	156.5	34079.3	2	2	0	6.7	373	8370
>sp|P25444|RS2_MOUSE 40S ribosomal protein S2 OS=Mus musculus GN=Rps2 PE=1 SV=3	2.1	2.12	172.3	40000.4	1	1	0	3.75	293	18184
>sp|Q64459|CP3AB_MOUSE Cytochrome P450 3A11 OS=Mus musculus GN=Cyp3a11 PE=1 SV=1	2.1	1.23	294.4	98896.1	2	2	0	3.37	504	4591
>sp|Q8CDG3|VCIP1_MOUSE Deubiquitinating protein VCIP135 OS=Mus musculus GN=Vcpip1 PE=2 SV=1	2.09	2.11	226.9	90556.2	2	2	0	1.31	1220	23089
>sp|Q9R112|SQRD_MOUSE Sulfide:quinone oxidoreductase, mitochondrial OS=Mus musculus GN=Sqrdl PE=2 SV=3	2.07	2.1	60.3	7595.1	1	1	0	3.11	450	20100
>sp|Q8CAQ8-3|IMMT_MOUSE Isoform 3 of Mitochondrial inner membrane protein OS=Mus musculus GN=Immt	2.05	1.38	218.7	155250	5	4	0	4.8	709	10078
>Reverse >sp|Q9WVB3|TLE6_MOUSE Transducin-like enhancer protein 6 OS=Mus musculus GN=Tle6 PE=1 SV=1	1.97	2	260.3	78614.7	2	1	0	1.55	581	45677
>sp|Q9JLV5|CUL3_MOUSE Cullin-3 OS=Mus musculus GN=Cul3 PE=1 SV=1	1.96	2.03	255.3	107240	1	1	0	1.04	768	5087
>Reverse >sp|O54804|CHKA_MOUSE Choline kinase alpha OS=Mus musculus GN=Chka PE=1 SV=2	1.95	1.97	231.7	391842	2	1	0	1.55	453	27913
>Reverse >sp|O54804-2|CHKA_MOUSE Isoform 2 of Choline kinase alpha OS=Mus musculus GN=Chka
>sp|O35728|CP4AE_MOUSE Cytochrome P450 4A14 OS=Mus musculus GN=Cyp4a14 PE=2 SV=1	1.9	1.95	162.9	19832.8	1	1	0	2.17	507	4597
>sp|O88587|COMT_MOUSE Catechol O-methyltransferase OS=Mus musculus GN=Comt PE=1 SV=1	1.86	1.86	215.3	65254.3	2	1	0	4.91	265	4439
>sp|O88587-2|COMT_MOUSE Isoform Soluble of Catechol O-methyltransferase OS=Mus musculus GN=Comt
>sp|P97872|FMO5_MOUSE Dimethylaniline monooxygenase [N-oxide-forming] 5 OS=Mus musculus GN=Fmo5 PE=2 SV=4	1.86	1	218.6	135668	3	3	0	4.69	533	7693
>sp|Q7TSG5|SH321_MOUSE SH3 domain-containing protein 21 OS=Mus musculus GN=Sh3d21 PE=1 SV=1	1.81	1.68	255.6	1.39527e+06	11	2	0	2.37	549	19196
>sp|Q7TSG5-2|SH321_MOUSE Isoform 2 of SH3 domain-containing protein 21 OS=Mus musculus GN=Sh3d21
>sp|Q63886|UD11_MOUSE UDP-glucuronosyltransferase 1-1 OS=Mus musculus GN=Ugt1a1 PE=2 SV=2	1.81	1.36	214.5	203223	3	3	0	5.05	535	22844
>Reverse >sp|Q8BVA4|LMOD1_MOUSE Leiomodin-1 OS=Mus musculus GN=Lmod1 PE=2 SV=1	1.8	0.95	239.2	199755	2	2	0	2.86	595	35976
>sp|Q9DBL7|COASY_MOUSE Bifunctional coenzyme A synthase OS=Mus musculus GN=Coasy PE=1 SV=2	1.8	1.85	257	84136.8	1	1	0	1.6	563	4361
>Reverse >sp|P47931|FST_MOUSE Follistatin OS=Mus musculus GN=Fst PE=2 SV=1	1.79	1.82	264.7	183399	2	2	0	4.65	344	32106
>Reverse >sp|Q6P1D5|SE6L1_MOUSE Seizure 6-like protein OS=Mus musculus GN=Sez6l PE=2 SV=1	1.78	1.86	235.6	74441.7	1	1	0	1.04	963	43147
>Reverse >sp|Q6P1D5-2|SE6L1_MOUSE Isoform 2 of Seizure 6-like protein OS=Mus musculus GN=Sez6l
>sp|P09103|PDIA1_MOUSE Protein disulfide-isomerase OS=Mus musculus GN=P4hb PE=1 SV=2	1.78	0.96	217.1	253978	4	3	0	6.29	509	15379
>sp|Q9D1D4|TMEDA_MOUSE Transmembrane emp24 domain-containing protein 10 OS=Mus musculus GN=Tmed10 PE=2 SV=1	1.77	1.79	289.3	109790	2	1	0	3.2	219	21715
>sp|Q9D1D4-2|TMEDA_MOUSE Isoform 2 of Transmembrane emp24 domain-containing protein 10 OS=Mus musculus GN=Tmed10
>sp|Q9DCT2|NDUS3_MOUSE NADH dehydrogenase [ubiquinone] iron-sulfur protein 3, mitochondrial OS=Mus musculus GN=Ndufs3 PE=1 SV=2	1.76	1.78	142.7	10730.9	1	1	0	4.94	263	13825
>Reverse >sp|P98083|SHC1_MOUSE SHC-transforming protein 1 OS=Mus musculus GN=Shc1 PE=1 SV=3	1.76	1.63	322.7	335227	10	1	0	1.38	579	43453
>Reverse >sp|P98083-2|SHC1_MOUSE Isoform p52Shc of SHC-transforming protein 1 OS=Mus musculus GN=Shc1
>Reverse >sp|P98083-3|SHC1_MOUSE Isoform p47Shc of SHC-transforming protein 1 OS=Mus musculus GN=Shc1
>Reverse >sp|Q9WV68|DECR2_MOUSE Peroxisomal 2,4-dienoyl-CoA reductase OS=Mus musculus GN=Decr2 PE=1 SV=1	1.74	1.77	314.4	651345	1	1	0	2.74	292	29690
>sp|P35278|RAB5C_MOUSE Ras-related protein Rab-5C OS=Mus musculus GN=Rab5c PE=1 SV=2	1.74	0.9	127.1	59280	3	3	0	16.2	216	16996
>sp|Q6A078|CE290_MOUSE Centrosomal protein of 290 kDa OS=Mus musculus GN=Cep290 PE=1 SV=2	1.63	1.83	256.2	76360.4	1	1	0	0.28	2472	3393
>sp|Q9D8T3|REBL1_MOUSE GTPase RhebL1 OS=Mus musculus GN=Rhebl1 PE=2 SV=1	1.63	1.62	251	46328.1	2	1	0	4.89	184	17300
>sp|Q9D826|SOX_MOUSE Peroxisomal sarcosine oxidase OS=Mus musculus GN=Pipox PE=2 SV=1	1.6	1.11	248.8	136593	3	2	0	4.62	390	19831
>sp|Q9CQF9|PCYOX_MOUSE Prenylcysteine oxidase OS=Mus musculus GN=Pcyox1 PE=1 SV=1	1.6	0.99	190.3	140545	3	3	0	6.34	505	15316
>sp|Q8QZY2|GLCTK_MOUSE Glycerate kinase OS=Mus musculus GN=Glyctk PE=2 SV=1	1.58	1.62	91.5	13871.4	1	1	0	1.91	523	8352
>Reverse >sp|Q69ZA1|CDK13_MOUSE Cyclin-dependent kinase 13 OS=Mus musculus GN=Cdk13 PE=1 SV=3	1.55	1.67	227.3	48314.1	1	1	0	0.6	1511	27496
>Reverse >sp|Q69ZA1-2|CDK13_MOUSE Isoform 2 of Cyclin-dependent kinase 13 OS=Mus musculus GN=Cdk13
>Reverse >sp|A2AWL7|MGAP_MOUSE MAX gene-associated protein OS=Mus musculus GN=Mga PE=2 SV=1	1.54	1.54	235.7	2.12715e+06	4	4	0	1.33	3003	36947
>Reverse >sp|A2AWL7-3|MGAP_MOUSE Isoform 3 of MAX gene-associated protein OS=Mus musculus GN=Mga
>sp|Q922Q1|MOSC2_MOUSE MOSC domain-containing protein 2, mitochondrial OS=Mus musculus GN=Marc2 PE=1 SV=1	1.54	0.94	262.4	234097	3	3	0	6.21	338	13043
>sp|Q9R0Q1|SYTL4_MOUSE Synaptotagmin-like protein 4 OS=Mus musculus GN=Sytl4 PE=1 SV=1	1.53	1.23	360.7	1.57888e+06	14	2	2	1.49	673	20671
>sp|Q9R0Q1-2|SYTL4_MOUSE Isoform 2 of Synaptotagmin-like protein 4 OS=Mus musculus GN=Sytl4
>sp|Q9R0Q1-3|SYTL4_MOUSE Isoform 3 of Synaptotagmin-like protein 4 OS=Mus musculus GN=Sytl4
>Reverse >sp|Q7TQK5|CCD93_MOUSE Coiled-coil domain-containing protein 93 OS=Mus musculus GN=Ccdc93 PE=2 SV=1	1.52	1.32	239.4	389232	16	2	1	1.91	629	27227
>sp|Q8BGG9|ACNT2_MOUSE Acyl-coenzyme A amino acid N-acyltransferase 2 OS=Mus musculus GN=Acnat2 PE=2 SV=1	1.5	1.11	113.4	104565	3	2	0	5.24	420	341
>sp|Q8BGG9-2|ACNT2_MOUSE Isoform 2 of Acyl-coenzyme A amino acid N-acyltransferase 2 OS=Mus musculus GN=Acnat2
>sp|Q9D024|CC47_MOUSE Coiled-coil domain-containing protein 47 OS=Mus musculus GN=Ccdc47 PE=2 SV=2	1.48	1.52	120.3	12063.6	1	1	0	2.28	483	2893
>sp|Q9D024-2|CC47_MOUSE Isoform 2 of Coiled-coil domain-containing protein 47 OS=Mus musculus GN=Ccdc47
>sp|P35486|ODPA_MOUSE Pyruvate dehydrogenase E1 component subunit alpha, somatic form, mitochondrial OS=Mus musculus GN=Pdha1 PE=1 SV=1	1.48	1.51	249.4	41506.7	1	1	0	2.31	390	14678
>sp|Q8BFP9|PDK1_MOUSE [Pyruvate dehydrogenase [lipoamide]] kinase isozyme 1, mitochondrial OS=Mus musculus GN=Pdk1 PE=2 SV=2	1.46	1.5	100.9	15427.1	1	1	0	2.53	434	15390
>sp|Q91V61|SFXN3_MOUSE Sideroflexin-3 OS=Mus musculus GN=Sfxn3 PE=1 SV=1	1.44	1.47	190.7	46941.9	1	1	0	2.8	321	19119
>sp|Q91V61-2|SFXN3_MOUSE Isoform 2 of Sideroflexin-3 OS=Mus musculus GN=Sfxn3
>sp|Q8BWQ1|UD2A3_MOUSE UDP-glucuronosyltransferase 2A3 OS=Mus musculus GN=Ugt2a3 PE=2 SV=1	1.43	0.7	219.4	178126	4	3	0	5.06	534	22851
>Reverse >sp|Q8CHU3|EPN2_MOUSE Epsin-2 OS=Mus musculus GN=Epn2 PE=1 SV=1	1.43	1.48	177.3	29768.8	1	1	1	1.68	595	30900
>Reverse >sp|Q8CHU3-2|EPN2_MOUSE Isoform 2 of Epsin-2 OS=Mus musculus GN=Epn2
>sp|Q9QXZ0|MACF1_MOUSE Microtubule-actin cross-linking factor 1 OS=Mus musculus GN=Macf1 PE=1 SV=2	1.42	1.97	237.2	128149	3	3	0	0.37	7354	12202
>sp|Q8BH43|WASF2_MOUSE Wiskott-Aldrich syndrome protein family member 2 OS=Mus musculus GN=Wasf2 PE=1 SV=1	1.41	1.45	259.5	55383.1	1	1	0	1.41	497	23289
>sp|Q9WUX5|MRVI1_MOUSE Protein MRVI1 OS=Mus musculus GN=Mrvi1 PE=1 SV=2	1.37	0.76	229.2	180626	2	2	0	1.11	899	13194
>sp|Q9WUX5-2|MRVI1_MOUSE Isoform 2 of Protein MRVI1 OS=Mus musculus GN=Mrvi1
>sp|P34914|HYES_MOUSE Epoxide hydrolase 2 OS=Mus musculus GN=Ephx2 PE=1 SV=2	1.35	1.39	199	25771.6	1	1	0	2.17	554	9668
>sp|P34914-2|HYES_MOUSE Isoform 2 of Epoxide hydrolase 2 OS=Mus musculus GN=Ephx2
>sp|Q8K4E0|ALMS1_MOUSE Alstrom syndrome protein 1 homolog OS=Mus musculus GN=Alms1 PE=1 SV=2	1.35	1.23	277.6	873063	5	4	2	0.74	3251	814
>sp|Q9QYF1|RDH11_MOUSE Retinol dehydrogenase 11 OS=Mus musculus GN=Rdh11 PE=2 SV=2	1.34	1.36	190.3	190319	2	2	1	6.01	316	17293
>Reverse >sp|Q62261|SPTB2_MOUSE Spectrin beta chain, brain 1 OS=Mus musculus GN=Sptbn1 PE=1 SV=2	1.34	1.12	286	148117	3	3	0	1.06	2363	44300
>Reverse >sp|Q62261-2|SPTB2_MOUSE Isoform 2 of Spectrin beta chain, brain 1 OS=Mus musculus GN=Sptbn1
>Reverse >sp|Q6NZM9|HDAC4_MOUSE Histone deacetylase 4 OS=Mus musculus GN=Hdac4 PE=1 SV=1	1.33	1.26	222.4	130694	2	2	0	1.86	1076	33345
>Reverse >sp|Q6NZM9-2|HDAC4_MOUSE Isoform 2 of Histone deacetylase 4 OS=Mus musculus GN=Hdac4
>sp|Q9Z0M5|LICH_MOUSE Lysosomal acid lipase/cholesteryl ester hydrolase OS=Mus musculus GN=Lipa PE=2 SV=2	1.32	1.35	128.6	29006.3	1	1	0	2.77	397	11635
>Reverse >sp|Q9JIX9|FASTK_MOUSE Fas-activated serine/threonine kinase OS=Mus musculus GN=Fastk PE=2 SV=1	1.3	1.35	239.7	86075.9	1	1	0	1.76	511	31563

## Sheet: Spot 5
Description	|Log Prob|	Best |Log Prob|	Best score	Total Intensity	# of spectra	# of unique peptides	# of mod peptides	Coverage %	# AA's in protein	Protein DB number
>sp|Q9EQ20|MMSA_MOUSE Methylmalonate-semialdehyde dehydrogenase [acylating], mitochondrial OS=Mus musculus GN=Aldh6a1 PE=1 SV=1	179.67	9.04	611.6	4.8277e+07	207	49	19	52.52	535	12968
>sp|P24270|CATA_MOUSE Catalase OS=Mus musculus GN=Cat PE=1 SV=4	153.25	11.72	769.9	1.55294e+07	113	49	15	52.56	527	2638
>sp|Q03265|ATPA_MOUSE ATP synthase subunit alpha, mitochondrial OS=Mus musculus GN=Atp5a1 PE=1 SV=1	148.45	10.72	715.3	8.07142e+07	150	46	14	46.84	553	1671
>sp|Q9JLJ2|AL9A1_MOUSE 4-trimethylaminobutyraldehyde dehydrogenase OS=Mus musculus GN=Aldh9a1 PE=1 SV=1	134.78	8.49	616.9	8.49182e+06	65	37	15	44.53	494	770
>sp|P26443|DHE3_MOUSE Glutamate dehydrogenase 1, mitochondrial OS=Mus musculus GN=Glud1 PE=1 SV=1	130.23	8.69	630.7	1.53709e+07	105	42	14	45.88	558	5628
>sp|Q8C196|CPSM_MOUSE Carbamoyl-phosphate synthase [ammonia], mitochondrial OS=Mus musculus GN=Cps1 PE=1 SV=2	116.11	4.55	518.4	5.67383e+06	61	46	8	23.13	1500	4652
>sp|O08749|DLDH_MOUSE Dihydrolipoyl dehydrogenase, mitochondrial OS=Mus musculus GN=Dld PE=1 SV=2	88.6	5.34	561.2	1.8623e+07	96	30	10	30.84	509	5743
>sp|Q9CPY7|AMPL_MOUSE Cytosol aminopeptidase OS=Mus musculus GN=Lap3 PE=1 SV=3	88.34	8.72	628.3	3.24403e+06	44	30	9	46.44	519	857
>sp|P47738|ALDH2_MOUSE Aldehyde dehydrogenase, mitochondrial OS=Mus musculus GN=Aldh2 PE=1 SV=1	87.9	6.83	531.8	3.8102e+07	200	27	3	37.38	519	776
>sp|K22E_HUMAN|(Common contaminant protein)	86.2	5.76	538.1	2.4638e+06	35	28	4	35.35	645	24164
>sp|Q9CZS1|AL1B1_MOUSE Aldehyde dehydrogenase X, mitochondrial OS=Mus musculus GN=Aldh1b1 PE=2 SV=1	82.01	6.36	542.7	1.36159e+07	77	27	7	38.54	519	754
>sp|P54869|HMCS2_MOUSE Hydroxymethylglutaryl-CoA synthase, mitochondrial OS=Mus musculus GN=Hmgcs2 PE=1 SV=2	72.68	5.05	556.1	5.59485e+06	52	32	13	30.91	508	9320
>sp|Q3UEG6|AGT2_MOUSE Alanine--glyoxylate aminotransferase 2, mitochondrial OS=Mus musculus GN=Agxt2 PE=2 SV=1	71.22	5.43	567.2	5.47507e+06	44	26	9	34.31	513	650
>sp|P51174|ACADL_MOUSE Long-chain specific acyl-CoA dehydrogenase, mitochondrial OS=Mus musculus GN=Acadl PE=2 SV=2	70.46	7.77	615.4	2558144	35	20	8	34.19	430	258
>sp|Q8BWF0|SSDH_MOUSE Succinate-semialdehyde dehydrogenase, mitochondrial OS=Mus musculus GN=Aldh5a1 PE=1 SV=1	68.71	8.13	614.1	3.25832e+06	37	24	8	30.4	523	20216
>sp|Q99LB7|SARDH_MOUSE Sarcosine dehydrogenase, mitochondrial OS=Mus musculus GN=Sardh PE=1 SV=1	66.13	5.4	459.6	3.15551e+06	30	21	4	14.58	919	18698
>sp|P61922|GABT_MOUSE 4-aminobutyrate aminotransferase, mitochondrial OS=Mus musculus GN=Abat PE=1 SV=1	65.83	5.31	526.3	1.90144e+06	30	20	6	28.4	500	8029
>sp|Q921G7|ETFD_MOUSE Electron transfer flavoprotein-ubiquinone oxidoreductase, mitochondrial OS=Mus musculus GN=Etfdh PE=1 SV=1	64.89	5.44	534.9	2.42552e+06	28	22	4	28.41	616	6821
>sp|Q3ULD5|MCCB_MOUSE Methylcrotonoyl-CoA carboxylase beta chain, mitochondrial OS=Mus musculus GN=Mccc2 PE=2 SV=1	63.21	4.43	350.6	1.71248e+06	28	22	5	37.12	563	12446
>sp|Q8K2B3|DHSA_MOUSE Succinate dehydrogenase [ubiquinone] flavoprotein subunit, mitochondrial OS=Mus musculus GN=Sdha PE=1 SV=1	61.2	8.13	643.5	2.23705e+06	26	19	5	23.34	664	5643
>sp|P50544|ACADV_MOUSE Very long-chain specific acyl-CoA dehydrogenase, mitochondrial OS=Mus musculus GN=Acadvl PE=1 SV=3	59.41	4.63	466.4	2125994	24	20	6	25.76	656	261
>sp|K1C10_HUMAN|(Common contaminant protein)	58.05	5.5	483.8	2.35139e+06	23	20	3	26.31	593	24150
>sp|Q99KI0|ACON_MOUSE Aconitate hydratase, mitochondrial OS=Mus musculus GN=Aco2 PE=1 SV=1	56.58	5.43	366.7	1.17798e+06	21	17	3	19.49	780	350
>sp|Q8BGT5|ALAT2_MOUSE Alanine aminotransferase 2 OS=Mus musculus GN=Gpt2 PE=2 SV=1	56.12	7.23	502.8	1.78539e+06	23	17	6	21.07	522	772
>sp|Q05920|PYC_MOUSE Pyruvate carboxylase, mitochondrial OS=Mus musculus GN=Pc PE=1 SV=1	54.17	5.72	438.4	3.14723e+06	26	20	5	16.72	1178	16878
>sp|Q8CHT0|AL4A1_MOUSE Delta-1-pyrroline-5-carboxylate dehydrogenase, mitochondrial OS=Mus musculus GN=Aldh4a1 PE=1 SV=3	52.88	5.5	565.2	3.15321e+06	26	21	7	23.84	562	765
>sp|Q9DBF1-2|AL7A1_MOUSE Isoform 2 of Alpha-aminoadipic semialdehyde dehydrogenase OS=Mus musculus GN=Aldh7a1	47.61	7.72	592.7	1.06523e+06	18	14	3	25.44	511	768
>sp|K2C1_HUMAN|(Common contaminant protein)	46.59	4.64	495.1	1.15119e+06	25	20	4	28.46	643	24165
>sp|Q9DBT9|M2GD_MOUSE Dimethylglycine dehydrogenase, mitochondrial OS=Mus musculus GN=Dmgdh PE=1 SV=1	45.83	5.77	517.6	775071	18	17	1	17.84	869	12140
>sp|Q07417|ACADS_MOUSE Short-chain specific acyl-CoA dehydrogenase, mitochondrial OS=Mus musculus GN=Acads PE=2 SV=2	45.62	5.47	488.4	862256	22	18	9	31.8	412	260
>sp|Q9Z0X1|AIFM1_MOUSE Apoptosis-inducing factor 1, mitochondrial OS=Mus musculus GN=Aifm1 PE=1 SV=1	44.47	6.28	481.4	1.20815e+06	22	14	2	22.06	612	672
>sp|Q921I1|TRFE_MOUSE Serotransferrin OS=Mus musculus GN=Tf PE=1 SV=1	43.26	4.93	436.2	597336	17	15	0	22.53	697	22124
>sp|P11725|OTC_MOUSE Ornithine carbamoyltransferase, mitochondrial OS=Mus musculus GN=Otc PE=1 SV=1	42.81	4.35	346.1	1.00225e+06	21	16	5	32.77	354	14875
>sp|Q60649|CLPB_MOUSE Caseinolytic peptidase B protein homolog OS=Mus musculus GN=Clpb PE=1 SV=1	42.18	4.73	413.9	1.03625e+06	17	13	3	13.59	677	4104
>sp|Q8QZT1|THIL_MOUSE Acetyl-CoA acetyltransferase, mitochondrial OS=Mus musculus GN=Acat1 PE=1 SV=1	41.53	5.68	531.2	961631	17	14	3	29.25	424	21319
>sp|Q99MR8|MCCA_MOUSE Methylcrotonoyl-CoA carboxylase subunit alpha, mitochondrial OS=Mus musculus GN=Mccc1 PE=2 SV=2	40.8	5.39	577.5	908624	20	17	6	19.25	717	12445
>sp|Q9QXX4|CMC2_MOUSE Calcium-binding mitochondrial carrier protein Aralar2 OS=Mus musculus GN=Slc25a13 PE=1 SV=1	39.6	6.47	547	1.25668e+06	21	13	2	17.46	676	4135
>sp|Q921X9|PDIA5_MOUSE Protein disulfide-isomerase A5 OS=Mus musculus GN=Pdia5 PE=2 SV=1	35.25	5.32	371	1282774	14	11	1	18.18	517	15384
>sp|Q8VCT4|CES3_MOUSE Carboxylesterase 3 OS=Mus musculus GN=Ces3 PE=1 SV=1	35.21	5.45	415.8	639143	13	10	0	18.23	565	3521
>sp|Q8BWT1|THIM_MOUSE 3-ketoacyl-CoA thiolase, mitochondrial OS=Mus musculus GN=Acaa2 PE=1 SV=3	33.57	5.27	414	931358	13	11	3	30.48	397	21320
>sp|Q9DCN1|NUD12_MOUSE Peroxisomal NADH pyrophosphatase NUDT12 OS=Mus musculus GN=Nudt12 PE=2 SV=1	33.5	4.6	359.4	1.1338e+06	13	12	0	26.62	462	14522
>sp|P32020|NLTP_MOUSE Non-specific lipid-transfer protein OS=Mus musculus GN=Scp2 PE=1 SV=3	33.17	4.5	373.3	897418	18	18	3	27.61	547	14127
>sp|P20060|HEXB_MOUSE Beta-hexosaminidase subunit beta OS=Mus musculus GN=Hexb PE=2 SV=2	33.04	4.55	384.1	1.02599e+06	13	13	2	19.03	536	9225
>sp|Q8VCW8|ACSF2_MOUSE Acyl-CoA synthetase family member 2, mitochondrial OS=Mus musculus GN=Acsf2 PE=2 SV=1	32.97	5.89	493.2	581902	11	11	2	16.75	615	373
>sp|Q9R0H0|ACOX1_MOUSE Peroxisomal acyl-coenzyme A oxidase 1 OS=Mus musculus GN=Acox1 PE=1 SV=5	30.34	5.45	412.5	516055	17	11	4	16.64	661	361
>sp|Q8CC88|K0564_MOUSE Uncharacterized protein KIAA0564 homolog OS=Mus musculus GN=Kiaa0564 PE=2 SV=2	29.54	4.54	383.3	526003	14	12	0	6.46	1905	10530
>sp|Q8CC88-2|K0564_MOUSE Isoform 2 of Uncharacterized protein KIAA0564 homolog OS=Mus musculus GN=Kiaa0564
>sp|P19221|THRB_MOUSE Prothrombin OS=Mus musculus GN=F2 PE=1 SV=1	28.88	5.15	320.6	532858	11	10	2	14.4	618	21342
>sp|P51660|DHB4_MOUSE Peroxisomal multifunctional enzyme type 2 OS=Mus musculus GN=Hsd17b4 PE=1 SV=3	28.11	6.32	498.4	483046	11	8	0	13.06	735	5618
>sp|P47791-2|GSHR_MOUSE Isoform Cytoplasmic of Glutathione reductase, mitochondrial OS=Mus musculus GN=Gsr	26.18	6.05	487	1.06644e+06	11	9	0	19.62	474	8847
>sp|P25688|URIC_MOUSE Uricase OS=Mus musculus GN=Uox PE=1 SV=2	26.14	5.21	371.2	668985	14	9	2	29.7	303	22959
>sp|P45952|ACADM_MOUSE Medium-chain specific acyl-CoA dehydrogenase, mitochondrial OS=Mus musculus GN=Acadm PE=1 SV=1	25.95	4.4	470.8	660447	12	11	2	25.18	421	259
>sp|Q99LC5|ETFA_MOUSE Electron transfer flavoprotein subunit alpha, mitochondrial OS=Mus musculus GN=Etfa PE=1 SV=2	25.95	4.16	357.6	428678	14	11	2	33.63	333	6819
>sp|P53657|KPYR_MOUSE Pyruvate kinase isozymes R/L OS=Mus musculus GN=Pklr PE=2 SV=1	25.12	5.26	358.4	435228	10	10	1	18.47	574	11246
>sp|Q3TQB2|FXRD1_MOUSE FAD-dependent oxidoreductase domain-containing protein 1 OS=Mus musculus GN=Foxred1 PE=2 SV=1	24.56	4.39	437.7	664563	11	9	2	14.78	487	7958
>sp|Q3TQB2-2|FXRD1_MOUSE Isoform 2 of FAD-dependent oxidoreductase domain-containing protein 1 OS=Mus musculus GN=Foxred1
>sp|Q8K0E8|FIBB_MOUSE Fibrinogen beta chain OS=Mus musculus GN=Fgb PE=2 SV=1	24.45	4.55	332.5	790920	13	11	3	19.33	481	7600
>sp|P05202|AATM_MOUSE Aspartate aminotransferase, mitochondrial OS=Mus musculus GN=Got2 PE=1 SV=1	24.26	5.61	344.7	530977	10	9	1	16.74	430	150
>sp|Q8BMS1|ECHA_MOUSE Trifunctional enzyme subunit alpha, mitochondrial OS=Mus musculus GN=Hadha PE=1 SV=1	24.23	4.41	443.1	545695	9	8	0	9.31	763	6294
>sp|P56593|CP2AC_MOUSE Cytochrome P450 2A12 OS=Mus musculus GN=Cyp2a12 PE=1 SV=2	23.88	4.89	495.3	552692	15	12	2	20.93	492	4570
>sp|P63038|CH60_MOUSE 60 kDa heat shock protein, mitochondrial OS=Mus musculus GN=Hspd1 PE=1 SV=1	22.22	4.53	369.8	768922	9	8	0	13.09	573	3647
>sp|P00687|AMY1_MOUSE Alpha-amylase 1 OS=Mus musculus GN=Amy1 PE=1 SV=2	22.16	6.99	538.3	663182	12	12	2	20.16	511	875
>sp|K1C9_HUMAN|(Common contaminant protein)	22.09	4.2	450	1.07407e+06	14	12	5	18.14	623	24152
>sp|Q9JJL8|SYSM_MOUSE Serine--tRNA ligase, mitochondrial OS=Mus musculus GN=Sars2 PE=2 SV=2	21.76	5.67	332.6	341076	10	9	0	20.66	518	20631
>sp|Q8K370|ACD10_MOUSE Acyl-CoA dehydrogenase family member 10 OS=Mus musculus GN=Acad10 PE=2 SV=1	21.4	5.22	385.2	702974	11	10	0	8.98	1069	284
>sp|P52196|THTR_MOUSE Thiosulfate sulfurtransferase OS=Mus musculus GN=Tst PE=1 SV=3	21.13	4.43	288.2	403796	8	7	1	25.25	297	21351
>sp|P50285|FMO1_MOUSE Dimethylaniline monooxygenase [N-oxide-forming] 1 OS=Mus musculus GN=Fmo1 PE=1 SV=1	21.11	4.21	404.1	413866	10	9	0	13.35	532	7689
>sp|Q9DBG1|CP27A_MOUSE Sterol 26-hydroxylase, mitochondrial OS=Mus musculus GN=Cyp27a1 PE=1 SV=1	21.04	6.05	494.8	275129	6	6	2	10.69	533	4566
>sp|Q8BGH2|SAM50_MOUSE Sorting and assembly machinery component 50 homolog OS=Mus musculus GN=Samm50 PE=1 SV=1	21.03	4.65	400.1	1011654	13	11	3	16.84	469	18678
>sp|P41216|ACSL1_MOUSE Long-chain-fatty-acid--CoA ligase 1 OS=Mus musculus GN=Acsl1 PE=1 SV=2	20.93	5.25	398.6	463749	10	10	1	12.3	699	379
>sp|Q64435|UD16_MOUSE UDP-glucuronosyltransferase 1-6 OS=Mus musculus GN=Ugt1a6 PE=1 SV=1	20.82	4.28	438.9	875807	8	7	1	10.17	531	22846
>sp|Q99MN9|PCCB_MOUSE Propionyl-CoA carboxylase beta chain, mitochondrial OS=Mus musculus GN=Pccb PE=1 SV=2	20.65	5.06	295.8	288642	11	9	1	20.89	541	15240
>sp|Q99K67|AASS_MOUSE Alpha-aminoadipic semialdehyde synthase, mitochondrial OS=Mus musculus GN=Aass PE=2 SV=1	20.55	5.73	489.4	547141	9	7	2	6.8	926	142
>sp|Q8BFR5|EFTU_MOUSE Elongation factor Tu, mitochondrial OS=Mus musculus GN=Tufm PE=1 SV=1	20.46	4.52	363	435039	9	7	0	15.71	452	6401
>sp|Q05421|CP2E1_MOUSE Cytochrome P450 2E1 OS=Mus musculus GN=Cyp2e1 PE=1 SV=1	20.18	4.44	369	709042	12	10	2	14.81	493	4580
>sp|Q9JHI5|IVD_MOUSE Isovaleryl-CoA dehydrogenase, mitochondrial OS=Mus musculus GN=Ivd PE=1 SV=1	20.1	4.55	305	353377	9	8	1	16.27	424	10421
>sp|Q8C5H8|NAKD1_MOUSE NAD kinase domain-containing protein 1 OS=Mus musculus GN=Nadkd1 PE=1 SV=2	19.34	3.95	293.3	340626	9	8	1	17.48	452	13605
>sp|Q8C5H8-2|NAKD1_MOUSE Isoform 2 of NAD kinase domain-containing protein 1 OS=Mus musculus GN=Nadkd1
>sp|Q8C5H8-3|NAKD1_MOUSE Isoform 3 of NAD kinase domain-containing protein 1 OS=Mus musculus GN=Nadkd1
>sp|Q8C5H8-4|NAKD1_MOUSE Isoform 4 of NAD kinase domain-containing protein 1 OS=Mus musculus GN=Nadkd1
>sp|P15392|CP2A4_MOUSE Cytochrome P450 2A4 OS=Mus musculus GN=Cyp2a4 PE=2 SV=2	19.32	6.49	488	213106	7	6	0	13.56	494	4568
>sp|Q71RI9|KAT3_MOUSE Kynurenine--oxoglutarate transaminase 3 OS=Mus musculus GN=Ccbl2 PE=1 SV=1	19.05	4.28	409.3	217425	9	8	2	14.07	455	10761
>sp|Q9WU79|PROD_MOUSE Proline dehydrogenase 1, mitochondrial OS=Mus musculus GN=Prodh PE=2 SV=2	18.32	5.01	433.9	319191	10	9	2	11.35	599	16488
>sp|Q8BW75|AOFB_MOUSE Amine oxidase [flavin-containing] B OS=Mus musculus GN=Maob PE=1 SV=4	18.16	5.57	331.8	830479	11	8	1	16.73	520	1076
>sp|B7ZMP1|XPP3_MOUSE Probable Xaa-Pro aminopeptidase 3 OS=Mus musculus GN=Xpnpep3 PE=2 SV=1	17.4	6.03	556.2	363654	5	5	3	8.89	506	23546
>sp|Q99J39|DCMC_MOUSE Malonyl-CoA decarboxylase, mitochondrial OS=Mus musculus GN=Mlycd PE=2 SV=1	17.39	4.7	353.5	326393	7	6	1	11.99	492	5374
>sp|Q9QXE0|HACL1_MOUSE 2-hydroxyacyl-CoA lyase 1 OS=Mus musculus GN=Hacl1 PE=1 SV=2	17.28	4.15	440.8	523632	9	8	2	10.84	581	9039
>sp|Q9D0K2|SCOT1_MOUSE Succinyl-CoA:3-ketoacid-coenzyme A transferase 1, mitochondrial OS=Mus musculus GN=Oxct1 PE=1 SV=1	17.06	4.42	320.4	343968	9	9	2	15.38	520	18860
>sp|Q01339|APOH_MOUSE Beta-2-glycoprotein 1 OS=Mus musculus GN=Apoh PE=1 SV=1	17	4.48	340.6	391942	9	8	0	23.77	345	1178
>sp|Q9DCW4|ETFB_MOUSE Electron transfer flavoprotein subunit beta OS=Mus musculus GN=Etfb PE=1 SV=3	16.92	4.47	309.4	235592	8	6	0	25.88	255	6820
>sp|Q61941|NNTM_MOUSE NAD(P) transhydrogenase, mitochondrial OS=Mus musculus GN=Nnt PE=1 SV=2	16.72	4.06	414.7	254113	7	7	1	6.08	1086	14157
>sp|O35488|S27A2_MOUSE Very long-chain acyl-CoA synthetase OS=Mus musculus GN=Slc27a2 PE=1 SV=2	16.57	5.16	284.1	218979	8	5	1	9.19	620	18495
>sp|P56657|CP240_MOUSE Cytochrome P450 2C40 OS=Mus musculus GN=Cyp2c40 PE=2 SV=2	16.41	4.55	343.5	395973	9	7	1	12.02	491	4559
>sp|Q3URE1|ACSF3_MOUSE Acyl-CoA synthetase family member 3, mitochondrial OS=Mus musculus GN=Acsf3 PE=2 SV=2	16.25	4.3	382.9	256365	6	6	0	10.98	583	374
>sp|Q9JLT4|TRXR2_MOUSE Thioredoxin reductase 2, mitochondrial OS=Mus musculus GN=Txnrd2 PE=1 SV=4	16.11	4	393.4	601456	10	8	2	10.69	524	22300
>sp|Q9JLT4-2|TRXR2_MOUSE Isoform 2 of Thioredoxin reductase 2, mitochondrial OS=Mus musculus GN=Txnrd2
>sp|Q9JLT4-4|TRXR2_MOUSE Isoform 4 of Thioredoxin reductase 2, mitochondrial OS=Mus musculus GN=Txnrd2
>sp|Q9CQN1|TRAP1_MOUSE Heat shock protein 75 kDa, mitochondrial OS=Mus musculus GN=Trap1 PE=1 SV=1	15.99	4.39	307.8	319495	7	7	0	9.91	706	22105
>sp|P08249|MDHM_MOUSE Malate dehydrogenase, mitochondrial OS=Mus musculus GN=Mdh2 PE=1 SV=3	15.91	5.11	282.4	277024	7	7	0	20.41	338	12516
>sp|Q8BJ64|CHDH_MOUSE Choline dehydrogenase, mitochondrial OS=Mus musculus GN=Chdh PE=1 SV=1	15.7	4.36	291.5	484222	7	7	0	10.4	596	3672
>sp|P97807|FUMH_MOUSE Fumarate hydratase, mitochondrial OS=Mus musculus GN=Fh PE=1 SV=3	15.61	4.51	335.2	493519	6	5	1	6.9	507	7908
>sp|P97807-2|FUMH_MOUSE Isoform Cytoplasmic of Fumarate hydratase, mitochondrial OS=Mus musculus GN=Fh
>sp|P08003|PDIA4_MOUSE Protein disulfide-isomerase A4 OS=Mus musculus GN=Pdia4 PE=1 SV=3	15.55	4.52	347.7	145250	5	5	1	8.15	638	15383
>sp|Q9JMA7|CP341_MOUSE Cytochrome P450 3A41 OS=Mus musculus GN=Cyp3a41a PE=2 SV=2	15.46	4.13	296.3	409999	7	7	0	12.1	504	4589
>sp|Q91VA0|ACSM1_MOUSE Acyl-coenzyme A synthetase ACSM1, mitochondrial OS=Mus musculus GN=Acsm1 PE=1 SV=1	15.41	4.51	364.7	369157	6	5	0	8.73	573	386
>sp|Q91VA0-2|ACSM1_MOUSE Isoform 2 of Acyl-coenzyme A synthetase ACSM1, mitochondrial OS=Mus musculus GN=Acsm1
>sp|P27773|PDIA3_MOUSE Protein disulfide-isomerase A3 OS=Mus musculus GN=Pdia3 PE=1 SV=2	15.27	4.12	295.8	314024	9	9	3	15.45	505	15382
>sp|Q9D7B6|ACAD8_MOUSE Isobutyryl-CoA dehydrogenase, mitochondrial OS=Mus musculus GN=Acad8 PE=2 SV=2	15.16	4.96	262.9	205452	7	7	0	18.16	413	256
>sp|O35490|BHMT1_MOUSE Betaine--homocysteine S-methyltransferase 1 OS=Mus musculus GN=Bhmt PE=2 SV=1	14.86	4.41	466.9	392773	5	4	0	9.09	407	2008
>sp|P58252|EF2_MOUSE Elongation factor 2 OS=Mus musculus GN=Eef2 PE=1 SV=2	14.84	4.26	452.1	717197	11	9	1	8.62	858	6357
>sp|O08601|MTP_MOUSE Microsomal triglyceride transfer protein large subunit OS=Mus musculus GN=Mttp PE=2 SV=2	14.73	5.36	374.4	172827	6	4	1	3.91	894	13326
>sp|O08601-2|MTP_MOUSE Isoform 2 of Microsomal triglyceride transfer protein large subunit OS=Mus musculus GN=Mttp
>sp|P17717|UDB17_MOUSE UDP-glucuronosyltransferase 2B17 OS=Mus musculus GN=Ugt2b17 PE=2 SV=1	14.3	4.5	438.7	461853	6	5	0	8.87	530	22854
>sp|Q8R4H7|NAGS_MOUSE N-acetylglutamate synthase, mitochondrial OS=Mus musculus GN=Nags PE=1 SV=2	14.26	4.84	304.4	522341	6	6	0	10.82	527	13599
>sp|Q91X77|CY250_MOUSE Cytochrome P450 2C50 OS=Mus musculus GN=Cyp2c50 PE=1 SV=2	13.82	4.12	400.7	332048	9	8	2	12.45	490	5194
>sp|Q9Z2W0|DNPEP_MOUSE Aspartyl aminopeptidase OS=Mus musculus GN=Dnpep PE=2 SV=2	13.67	4.52	357.5	147236	5	4	0	9.3	473	5912
>sp|Q99MZ7|PECR_MOUSE Peroxisomal trans-2-enoyl-CoA reductase OS=Mus musculus GN=Pecr PE=2 SV=1	13.12	6.05	389	131606	3	3	0	10.56	303	15453
>sp|P97742|CPT1A_MOUSE Carnitine O-palmitoyltransferase 1, liver isoform OS=Mus musculus GN=Cpt1a PE=2 SV=4	13.06	4.33	347.4	332604	6	4	0	5.3	773	4653
>sp|Q91YI0|ARLY_MOUSE Argininosuccinate lyase OS=Mus musculus GN=Asl PE=2 SV=1	13.05	4.42	306.5	257141	7	6	1	10.56	464	1352
>sp|Q64458|CP2CT_MOUSE Cytochrome P450 2C29 OS=Mus musculus GN=Cyp2c29 PE=1 SV=2	12.95	4.26	336.8	190605	6	5	0	9.8	490	4575
>sp|Q64521|GPDM_MOUSE Glycerol-3-phosphate dehydrogenase, mitochondrial OS=Mus musculus GN=Gpd2 PE=1 SV=2	12.55	3.93	267.1	311618	6	5	0	6.19	727	8603
>sp|Q61781|K1C14_MOUSE Keratin, type I cytoskeletal 14 OS=Mus musculus GN=Krt14 PE=1 SV=2	12.33	5.34	482.7	300337	4	4	0	7.44	484	10667
>sp|Q3UNX5|ACSM3_MOUSE Acyl-coenzyme A synthetase ACSM3, mitochondrial OS=Mus musculus GN=Acsm3 PE=1 SV=2	12.32	5.05	315.6	109962	5	4	0	7.41	580	391
>sp|Q3UNX5-2|ACSM3_MOUSE Isoform 2 of Acyl-coenzyme A synthetase ACSM3, mitochondrial OS=Mus musculus GN=Acsm3
>sp|O35423|SPYA_MOUSE Serine--pyruvate aminotransferase, mitochondrial OS=Mus musculus GN=Agxt PE=1 SV=2	12.16	5.88	412.5	195770	4	4	0	9.44	413	20097
>sp|O35423-2|SPYA_MOUSE Isoform Peroxisomal of Serine--pyruvate aminotransferase, mitochondrial OS=Mus musculus GN=Agxt
>sp|Q571F8|GLSL_MOUSE Glutaminase liver isoform, mitochondrial OS=Mus musculus GN=Gls2 PE=2 SV=2	12.04	4.13	406	211999	6	6	1	8.8	602	8403
>sp|P38647|GRP75_MOUSE Stress-70 protein, mitochondrial OS=Mus musculus GN=Hspa9 PE=1 SV=2	11.84	4.47	283.3	339004	8	7	0	10.16	679	8805
>sp|Q91W43|GCSP_MOUSE Glycine dehydrogenase [decarboxylating], mitochondrial OS=Mus musculus GN=Gldc PE=1 SV=1	11.44	4.3	398.3	286436	4	4	0	3.51	1025	8193
>sp|Q8BH95|ECHM_MOUSE Enoyl-CoA hydratase, mitochondrial OS=Mus musculus GN=Echs1 PE=1 SV=1	11.32	4.47	431.1	85769.8	3	3	0	11.38	290	6302
>sp|O70475|UGDH_MOUSE UDP-glucose 6-dehydrogenase OS=Mus musculus GN=Ugdh PE=1 SV=1	11.28	3.86	294.4	210908	5	3	0	6.49	493	22872
>sp|Q8BH59|CMC1_MOUSE Calcium-binding mitochondrial carrier protein Aralar1 OS=Mus musculus GN=Slc25a12 PE=1 SV=1	11.27	4.75	274.8	176835	5	4	0	6.2	677	4134
>sp|P50431|GLYC_MOUSE Serine hydroxymethyltransferase, cytosolic OS=Mus musculus GN=Shmt1 PE=1 SV=3	11.24	4.37	357.9	181842	5	4	0	9.21	478	8426
>sp|P62737|ACTA_MOUSE Actin, aortic smooth muscle OS=Mus musculus GN=Acta2 PE=1 SV=1	11.09	4.61	329.5	138122	5	4	1	10.08	377	398
>sp|P60710|ACTB_MOUSE Actin, cytoplasmic 1 OS=Mus musculus GN=Actb PE=1 SV=1
>sp|P68033|ACTC_MOUSE Actin, alpha cardiac muscle 1 OS=Mus musculus GN=Actc1 PE=1 SV=1
>sp|P63260|ACTG_MOUSE Actin, cytoplasmic 2 OS=Mus musculus GN=Actg1 PE=1 SV=1
>sp|P63268|ACTH_MOUSE Actin, gamma-enteric smooth muscle OS=Mus musculus GN=Actg2 PE=2 SV=1
>sp|P68134|ACTS_MOUSE Actin, alpha skeletal muscle OS=Mus musculus GN=Acta1 PE=1 SV=1
>sp|Q9CQQ7|AT5F1_MOUSE ATP synthase subunit b, mitochondrial OS=Mus musculus GN=Atp5f1 PE=1 SV=1	11.03	4.22	376.1	282054	3	3	0	9.37	256	1570
>sp|Q8R1S0|COQ6_MOUSE Ubiquinone biosynthesis monooxygenase COQ6 OS=Mus musculus GN=Coq6 PE=2 SV=2	10.98	4	412.4	270826	6	6	0	12.37	469	4463
>sp|Q91YT0|NDUV1_MOUSE NADH dehydrogenase [ubiquinone] flavoprotein 1, mitochondrial OS=Mus musculus GN=Ndufv1 PE=1 SV=1	10.98	5.03	351.3	307606	6	5	0	10.56	464	13831
>sp|P47740|AL3A2_MOUSE Fatty aldehyde dehydrogenase OS=Mus musculus GN=Aldh3a2 PE=2 SV=2	10.9	2.83	278.6	607035	10	8	1	13.43	484	763
>sp|Q99KK9|SYHM_MOUSE Probable histidine--tRNA ligase, mitochondrial OS=Mus musculus GN=Hars2 PE=2 SV=1	10.85	4.83	271.3	131378	4	4	0	9.31	505	20565
>sp|P38060|HMGCL_MOUSE Hydroxymethylglutaryl-CoA lyase, mitochondrial OS=Mus musculus GN=Hmgcl PE=1 SV=2	10.78	3.66	257.3	226534	5	4	0	12.62	325	9332
>sp|Q99PL5|RRBP1_MOUSE Ribosome-binding protein 1 OS=Mus musculus GN=Rrbp1 PE=2 SV=2	10.71	4.09	299.7	209382	9	8	1	4.8	1605	18123
>sp|Q99JY0|ECHB_MOUSE Trifunctional enzyme subunit beta, mitochondrial OS=Mus musculus GN=Hadhb PE=1 SV=1	10.69	4.52	375.7	316332	8	7	2	10.32	475	6295
>sp|Q64464|CP3AD_MOUSE Cytochrome P450 3A13 OS=Mus musculus GN=Cyp3a13 PE=2 SV=1	10.46	3.71	311.6	254045	7	5	1	10.34	503	4592
>sp|Q8QZS1|HIBCH_MOUSE 3-hydroxyisobutyryl-CoA hydrolase, mitochondrial OS=Mus musculus GN=Hibch PE=1 SV=1	10.39	3.72	289.9	200521	6	6	1	15.84	385	9252
>sp|Q9DCM0|ETHE1_MOUSE Protein ETHE1, mitochondrial OS=Mus musculus GN=Ethe1 PE=1 SV=2	9.92	4.26	359.1	68479.8	3	3	0	11.81	254	6822
>sp|P54071|IDHP_MOUSE Isocitrate dehydrogenase [NADP], mitochondrial OS=Mus musculus GN=Idh2 PE=1 SV=3	9.77	4.11	344.2	452906	6	5	0	11.73	452	9778
>sp|Q8BGA8|ACSM5_MOUSE Acyl-coenzyme A synthetase ACSM5, mitochondrial OS=Mus musculus GN=Acsm5 PE=2 SV=1	9.72	4.43	403.1	387007	7	4	0	8.3	578	394
>sp|Q8JZR0|ACSL5_MOUSE Long-chain-fatty-acid--CoA ligase 5 OS=Mus musculus GN=Acsl5 PE=2 SV=1	9.6	4.12	279.8	130963	6	5	0	6.88	683	383
>sp|P56480|ATPB_MOUSE ATP synthase subunit beta, mitochondrial OS=Mus musculus GN=Atp5b PE=1 SV=2	9.47	4.5	325.8	67530.6	3	3	1	7.37	529	1672
>sp|Q9CQF9|PCYOX_MOUSE Prenylcysteine oxidase OS=Mus musculus GN=Pcyox1 PE=1 SV=1	9.29	4.32	291.4	272542	5	3	0	5.35	505	15316
>sp|Q91WN4|KMO_MOUSE Kynurenine 3-monooxygenase OS=Mus musculus GN=Kmo PE=1 SV=1	9.12	4.25	415.3	242925	3	3	0	5.85	479	11214
>sp|Q9QYR7|ACOT3_MOUSE Acyl-coenzyme A thioesterase 3 OS=Mus musculus GN=Acot3 PE=2 SV=1	8.87	4.6	372.9	274273	2	2	0	5.32	432	353
>sp|Q9QYR7-2|ACOT3_MOUSE Isoform 2 of Acyl-coenzyme A thioesterase 3 OS=Mus musculus GN=Acot3
>sp|P01869|IGH1M_MOUSE Ig gamma-1 chain C region, membrane-bound form OS=Mus musculus GN=Ighg1 PE=1 SV=2	8.76	4.47	330	124867	4	3	0	8.4	393	9913
>sp|P01868|IGHG1_MOUSE Ig gamma-1 chain C region secreted form OS=Mus musculus GN=Ighg1 PE=1 SV=1
>sp|TRYP_PIG|(Common contaminant protein)	8.74	4.36	456.1	1112601	15	3	1	7.79	231	24193
>sp|P53395|ODB2_MOUSE Lipoamide acyltransferase component of branched-chain alpha-keto acid dehydrogenase complex, mitochondrial OS=Mus musculus GN=Dbt PE=2 SV=2	8.68	4.55	333.3	161212	4	3	0	5.81	482	14650
>sp|P01027|CO3_MOUSE Complement C3 OS=Mus musculus GN=C3 PE=1 SV=3	8.63	3.36	261.2	118352	5	5	0	3.49	1663	4329
>sp|P70290|EM55_MOUSE 55 kDa erythrocyte membrane protein OS=Mus musculus GN=Mpp1 PE=1 SV=1	8.61	4.26	322	133171	4	4	0	10.09	466	6533
>sp|Q8BHN3|GANAB_MOUSE Neutral alpha-glucosidase AB OS=Mus musculus GN=Ganab PE=1 SV=1	8.4	4.15	281.3	364393	5	4	0	3.92	944	8060
>sp|Q8BHN3-2|GANAB_MOUSE Isoform 2 of Neutral alpha-glucosidase AB OS=Mus musculus GN=Ganab
>sp|Q8BHN3-3|GANAB_MOUSE Isoform 3 of Neutral alpha-glucosidase AB OS=Mus musculus GN=Ganab
>sp|P01867-2|IGG2B_MOUSE Isoform 2 of Ig gamma-2B chain C region OS=Mus musculus GN=Igh-3	8.35	4.16	271.9	184232	4	3	0	10.15	335	9912
>sp|A2ATU0|DHTK1_MOUSE Probable 2-oxoglutarate dehydrogenase E1 component DHKTD1, mitochondrial OS=Mus musculus GN=Dhtkd1 PE=2 SV=1	8.3	4.13	408.1	306286	5	4	1	4.56	921	5647
>sp|Q61176|ARGI1_MOUSE Arginase-1 OS=Mus musculus GN=Arg1 PE=1 SV=1	8.3	4.39	286.8	82897.3	3	2	0	5.88	323	1251
>sp|Q9Z0M5|LICH_MOUSE Lysosomal acid lipase/cholesteryl ester hydrolase OS=Mus musculus GN=Lipa PE=2 SV=2	8.27	4.09	268.5	369396	7	5	1	9.57	397	11635
>sp|Q9CQA3|DHSB_MOUSE Succinate dehydrogenase [ubiquinone] iron-sulfur subunit, mitochondrial OS=Mus musculus GN=Sdhb PE=1 SV=1	8.12	4.15	287	119209	4	3	1	10.64	282	5644
>sp|Q9EP89|LACTB_MOUSE Serine beta-lactamase-like protein LACTB, mitochondrial OS=Mus musculus GN=Lactb PE=1 SV=1	8.07	4.17	255.9	182077	5	4	0	6.9	551	11426
>sp|P51881|ADT2_MOUSE ADP/ATP translocase 2 OS=Mus musculus GN=Slc25a5 PE=1 SV=3	8.04	4.24	314	255030	5	5	1	14.77	298	570
>sp|Q60759|GCDH_MOUSE Glutaryl-CoA dehydrogenase, mitochondrial OS=Mus musculus GN=Gcdh PE=2 SV=2	7.87	4.44	362.8	363789	7	5	0	9.82	438	8163
>sp|Q8VEM8|MPCP_MOUSE Phosphate carrier protein, mitochondrial OS=Mus musculus GN=Slc25a3 PE=1 SV=1	7.86	3.93	270.4	186281	5	4	0	10.08	357	13081
>sp|Q99K23|UFSP2_MOUSE Ufm1-specific protease 2 OS=Mus musculus GN=Ufsp2 PE=1 SV=1	7.8	4.66	331.5	177022	4	4	1	5.86	461	22871
>sp|Q571E4|GALNS_MOUSE N-acetylgalactosamine-6-sulfatase OS=Mus musculus GN=Galns PE=2 SV=2	7.75	3.92	296.1	199381	4	3	0	5.77	520	8041
>sp|Q9DB77|QCR2_MOUSE Cytochrome b-c1 complex subunit 2, mitochondrial OS=Mus musculus GN=Uqcrc2 PE=1 SV=1	7.65	3.18	220.2	314117	8	7	2	10.15	453	16899
>sp|Q9DCU9|HOGA1_MOUSE Probable 4-hydroxy-2-oxoglutarate aldolase, mitochondrial OS=Mus musculus GN=Hoga1 PE=1 SV=1	7.64	3.83	311.7	61733.4	3	2	0	7.79	321	9394
>sp|O35459|ECH1_MOUSE Delta(3,5)-Delta(2,4)-dienoyl-CoA isomerase, mitochondrial OS=Mus musculus GN=Ech1 PE=2 SV=1	7.52	2.82	269.4	159044	5	5	0	14.98	327	6293
>sp|Q922Q1|MOSC2_MOUSE MOSC domain-containing protein 2, mitochondrial OS=Mus musculus GN=Marc2 PE=1 SV=1	7.38	3.34	258.3	241222	4	4	0	9.47	338	13043
>sp|Q7TT50|MRCKB_MOUSE Serine/threonine-protein kinase MRCK beta OS=Mus musculus GN=Cdc42bpb PE=1 SV=2	7.35	3.01	250.2	154458	5	5	0	3.04	1713	13142
>sp|Q63886|UD11_MOUSE UDP-glucuronosyltransferase 1-1 OS=Mus musculus GN=Ugt1a1 PE=2 SV=2	7.33	2.72	325.3	336455	6	5	0	6.54	535	22844
>sp|Q9QXD1|ACOX2_MOUSE Peroxisomal acyl-coenzyme A oxidase 2 OS=Mus musculus GN=Acox2 PE=1 SV=2	7.31	4.44	348.5	105227	4	2	0	3.23	681	362
>sp|P10126|EF1A1_MOUSE Elongation factor 1-alpha 1 OS=Mus musculus GN=Eef1a1 PE=1 SV=3	7.26	4.42	282.3	73461.8	2	2	0	4.76	462	6349
>sp|Q61425|HCDH_MOUSE Hydroxyacyl-coenzyme A dehydrogenase, mitochondrial OS=Mus musculus GN=Hadh PE=1 SV=2	7.24	3.27	344.9	428350	3	3	0	7.32	314	9109
>sp|Q91ZA3|PCCA_MOUSE Propionyl-CoA carboxylase alpha chain, mitochondrial OS=Mus musculus GN=Pcca PE=2 SV=2	7.11	2.75	291.9	130180	4	4	0	4.7	724	15239
>sp|Q922U2|K2C5_MOUSE Keratin, type II cytoskeletal 5 OS=Mus musculus GN=Krt5 PE=1 SV=1	6.88	4.34	401.2	84490.5	3	3	1	5.34	580	10703
>sp|Q99MD6|TRXR3_MOUSE Thioredoxin reductase 3 (Fragment) OS=Mus musculus GN=Txnrd3 PE=1 SV=2	6.68	3.01	308.4	395889	5	4	0	4.3	697	22304
>sp|Q8R086|SUOX_MOUSE Sulfite oxidase, mitochondrial OS=Mus musculus GN=Suox PE=1 SV=2	6.62	3.64	362.3	122779	3	3	0	4.58	546	20483
>sp|Q9DBM2|ECHP_MOUSE Peroxisomal bifunctional enzyme OS=Mus musculus GN=Ehhadh PE=1 SV=4	6.6	3.69	274.8	78162.8	2	2	0	2.23	718	6303
>sp|Q61495|DSG1A_MOUSE Desmoglein-1-alpha OS=Mus musculus GN=Dsg1a PE=2 SV=2	6.59	3.53	221.8	25064.2	2	2	2	2.18	1057	6074
>sp|Q7TSF1|DSG1B_MOUSE Desmoglein-1-beta OS=Mus musculus GN=Dsg1b PE=1 SV=1
>sp|P26043|RADI_MOUSE Radixin OS=Mus musculus GN=Rdx PE=1 SV=3	6.54	4.45	330.8	332609	7	7	0	11.15	583	17049
>sp|Q91YP0|L2HDH_MOUSE L-2-hydroxyglutarate dehydrogenase, mitochondrial OS=Mus musculus GN=L2hgdh PE=2 SV=1	6.48	2.66	228.3	72283.2	3	3	0	7.76	464	11419
>sp|Q99J99|THTM_MOUSE 3-mercaptopyruvate sulfurtransferase OS=Mus musculus GN=Mpst PE=1 SV=3	6.46	4.45	327	104772	2	2	0	6.73	297	21349
>sp|Q9D7J9|ECHD3_MOUSE Enoyl-CoA hydratase domain-containing protein 3, mitochondrial OS=Mus musculus GN=Echdc3 PE=2 SV=1	6.37	3.79	226.8	43256.2	3	2	0	7.33	300	6301
>sp|Q9CPQ3|TOM22_MOUSE Mitochondrial import receptor subunit TOM22 homolog OS=Mus musculus GN=Tomm22 PE=2 SV=3	6.32	4.13	272.6	17050.8	2	2	1	8.45	142	21936
>sp|P24549|AL1A1_MOUSE Retinal dehydrogenase 1 OS=Mus musculus GN=Aldh1a1 PE=1 SV=5	6.28	1.76	237.9	157919	5	5	2	9.98	501	750
>sp|Q8VCC2|EST1_MOUSE Liver carboxylesterase 1 OS=Mus musculus GN=Ces1 PE=2 SV=1	6.24	3.95	306.9	43493.8	2	2	0	3.54	565	6801
>sp|Q80XL6|ACD11_MOUSE Acyl-CoA dehydrogenase family member 11 OS=Mus musculus GN=Acad11 PE=1 SV=2	6.01	2.71	242.1	155338	5	4	0	4.75	779	285
>sp|P20108|PRDX3_MOUSE Thioredoxin-dependent peroxide reductase, mitochondrial OS=Mus musculus GN=Prdx3 PE=1 SV=1	6.01	3.04	266.2	85388.7	4	4	1	12.06	257	16430
>sp|P14211|CALR_MOUSE Calreticulin OS=Mus musculus GN=Calr PE=1 SV=1	5.92	3.76	287.5	215978	5	5	0	12.26	416	2532
>sp|P58710|GGLO_MOUSE L-gulonolactone oxidase OS=Mus musculus GN=Gulo PE=1 SV=3	5.91	1.97	371.7	182732	4	4	0	8.18	440	8278
>sp|Q91X72|HEMO_MOUSE Hemopexin OS=Mus musculus GN=Hpx PE=1 SV=2	5.81	3.98	246.7	139220	3	3	0	5.65	460	9198
>sp|Q8CAQ8-5|IMMT_MOUSE Isoform 5 of Mitochondrial inner membrane protein OS=Mus musculus GN=Immt	5.77	3.64	235.7	70839.4	3	3	0	3.8	790	10080
>sp|Q8K0C4|CP51A_MOUSE Lanosterol 14-alpha demethylase OS=Mus musculus GN=Cyp51a1 PE=2 SV=1	5.73	4.13	256.3	53171.4	3	3	0	6.76	503	4603
>sp|Q8R2E9|ERO1B_MOUSE ERO1-like protein beta OS=Mus musculus GN=Ero1lb PE=2 SV=1	5.71	2.8	191.4	118472	5	4	0	8.78	467	6753
>sp|Q9Z2L6|MINP1_MOUSE Multiple inositol polyphosphate phosphatase 1 OS=Mus musculus GN=Minpp1 PE=1 SV=3	5.65	4.37	316.3	144211	3	2	0	3.74	481	12817
>sp|Q91VR2|ATPG_MOUSE ATP synthase subunit gamma, mitochondrial OS=Mus musculus GN=Atp5c1 PE=1 SV=1	5.53	4.15	283.9	335008	4	4	1	10.74	298	1676
>sp|Q9D379|HYEP_MOUSE Epoxide hydrolase 1 OS=Mus musculus GN=Ephx1 PE=1 SV=2	5.5	2.83	233.5	170017	5	5	0	8.79	455	9667
>sp|Q9EQF5|DPYS_MOUSE Dihydropyrimidinase OS=Mus musculus GN=Dpys PE=2 SV=2	5.39	4.25	281.6	28009.2	2	2	0	5.78	519	6036
>sp|Q8BGC4|ZADH2_MOUSE Zinc-binding alcohol dehydrogenase domain-containing protein 2 OS=Mus musculus GN=Zadh2 PE=2 SV=1	5.39	3.18	269.7	50698.2	2	2	0	5.04	377	23658
>sp|O08756|HCD2_MOUSE 3-hydroxyacyl-CoA dehydrogenase type-2 OS=Mus musculus GN=Hsd17b10 PE=1 SV=4	5.35	3.14	212.4	58072.3	3	3	0	15.71	261	9108
>sp|P97872|FMO5_MOUSE Dimethylaniline monooxygenase [N-oxide-forming] 5 OS=Mus musculus GN=Fmo5 PE=2 SV=4	5.34	4.54	329	118314	3	2	0	3.38	533	7693
>sp|Q3UHB1|NT5D3_MOUSE 5'-nucleotidase domain-containing protein 3 OS=Mus musculus GN=Nt5dc3 PE=2 SV=1	5.32	3.96	244.8	92959.8	3	2	0	3.48	546	14448
>sp|Q3ULF4|SPG7_MOUSE Paraplegin OS=Mus musculus GN=Spg7 PE=1 SV=1	5.27	2.66	256.2	110320	3	3	0	3.59	781	19966
>sp|Q9CW42|MOSC1_MOUSE MOSC domain-containing protein 1, mitochondrial OS=Mus musculus GN=Marc1 PE=1 SV=2	5.27	4.57	342.7	93701.5	3	3	1	7.65	340	13042
>sp|P68369|TBA1A_MOUSE Tubulin alpha-1A chain OS=Mus musculus GN=Tuba1a PE=1 SV=1	5.18	3.68	103.2	9718.4	2	2	0	7.76	451	20898
>sp|P05213|TBA1B_MOUSE Tubulin alpha-1B chain OS=Mus musculus GN=Tuba1b PE=1 SV=2
>sp|P68373|TBA1C_MOUSE Tubulin alpha-1C chain OS=Mus musculus GN=Tuba1c PE=1 SV=1
>sp|Q8VCM8|NCLN_MOUSE Nicalin OS=Mus musculus GN=Ncln PE=2 SV=2	5.17	2.8	280.2	146056	4	4	1	6.93	563	13729
>sp|Q91VS7|MGST1_MOUSE Microsomal glutathione S-transferase 1 OS=Mus musculus GN=Mgst1 PE=1 SV=3	5.16	5.17	244.5	14294	1	1	0	8.39	155	12748
>sp|P42125|ECI1_MOUSE Enoyl-CoA delta isomerase 1, mitochondrial OS=Mus musculus GN=Eci1 PE=2 SV=1	5.14	4.66	328.9	95999.3	2	2	0	7.96	289	6304
>sp|Q9WTP6|KAD2_MOUSE Adenylate kinase 2, mitochondrial OS=Mus musculus GN=Ak2 PE=1 SV=5	5.14	4.23	318.6	137259	4	3	0	13.39	239	10724
>sp|Q9WTP6-2|KAD2_MOUSE Isoform 2 of Adenylate kinase 2, mitochondrial OS=Mus musculus GN=Ak2
>sp|Q9ESB3|HRG_MOUSE Histidine-rich glycoprotein OS=Mus musculus GN=Hrg PE=1 SV=2	5.08	2.87	219.9	123479	3	3	0	5.33	525	9448
>sp|Q9D0M3|CY1_MOUSE Cytochrome c1, heme protein, mitochondrial OS=Mus musculus GN=Cyc1 PE=1 SV=1	4.95	2.5	286.2	55412.4	2	2	0	6.15	325	5189
>sp|Q9D0M3-2|CY1_MOUSE Isoform 2 of Cytochrome c1, heme protein, mitochondrial OS=Mus musculus GN=Cyc1
>sp|Q9DC50|OCTC_MOUSE Peroxisomal carnitine O-octanoyltransferase OS=Mus musculus GN=Crot PE=1 SV=1	4.93	3.89	353	217330	3	3	0	3.76	612	14646
>sp|P55096|ABCD3_MOUSE ATP-binding cassette sub-family D member 3 OS=Mus musculus GN=Abcd3 PE=1 SV=2	4.93	4.98	224.2	20490.4	1	1	1	2.28	659	179
>sp|Q02257|PLAK_MOUSE Junction plakoglobin OS=Mus musculus GN=Jup PE=1 SV=3	4.9	4.18	260.5	111254	4	2	0	2.68	745	15915
>sp|Q9ET01|PYGL_MOUSE Glycogen phosphorylase, liver form OS=Mus musculus GN=Pygl PE=1 SV=4	4.75	2.35	244.1	220756	6	6	0	6.12	850	16881
>sp|Q6GQS1|SCMC3_MOUSE Calcium-binding mitochondrial carrier protein SCaMC-3 OS=Mus musculus GN=Slc25a23 PE=2 SV=1	4.74	2.53	247.3	132217	3	2	0	3.64	467	18825
>sp|Q8JZN5|ACAD9_MOUSE Acyl-CoA dehydrogenase family member 9, mitochondrial OS=Mus musculus GN=Acad9 PE=2 SV=2	4.73	2.85	224.6	50417.3	2	2	0	3.04	625	257
>sp|Q8BH86|CN159_MOUSE UPF0317 protein C14orf159 homolog, mitochondrial OS=Mus musculus PE=2 SV=1	4.58	2.34	167.3	40530	2	2	0	3.4	617	4178
>sp|Q8BH86-2|CN159_MOUSE Isoform 2 of UPF0317 protein C14orf159 homolog, mitochondrial OS=Mus musculus
>sp|Q9D172|ES1_MOUSE ES1 protein homolog, mitochondrial OS=Mus musculus GN=D10Jhu81e PE=1 SV=1	4.53	2.91	332.5	104620	2	2	0	6.77	266	6762
>sp|Q9D1G1|RAB1B_MOUSE Ras-related protein Rab-1B OS=Mus musculus GN=Rab1b PE=1 SV=1	4.53	4.5	318.2	59242	2	2	0	9.95	201	16967
>sp|P35279|RAB6A_MOUSE Ras-related protein Rab-6A OS=Mus musculus GN=Rab6a PE=1 SV=4	4.48	4.5	318.2	28483	1	1	0	5.29	208	16997
>sp|P35279-2|RAB6A_MOUSE Isoform 2 of Ras-related protein Rab-6A OS=Mus musculus GN=Rab6a
>sp|P61294|RAB6B_MOUSE Ras-related protein Rab-6B OS=Mus musculus GN=Rab6b PE=1 SV=1
>sp|Q8BHD0|RB39A_MOUSE Ras-related protein Rab-39A OS=Mus musculus GN=Rab39a PE=2 SV=1
>sp|Q8K386|RAB15_MOUSE Ras-related protein Rab-15 OS=Mus musculus GN=Rab15 PE=1 SV=1	4.48	4.5	318.2	28483	1	1	0	5.19	212	16962
>sp|Q9D826|SOX_MOUSE Peroxisomal sarcosine oxidase OS=Mus musculus GN=Pipox PE=2 SV=1	4.48	2.93	330.5	324932	3	3	0	6.41	390	19831
>sp|Q8JZZ0|UD3A2_MOUSE UDP-glucuronosyltransferase 3A2 OS=Mus musculus GN=Ugt3a2 PE=2 SV=2	4.46	4.44	435.4	111132	2	2	0	3.06	523	22853
>sp|P09103|PDIA1_MOUSE Protein disulfide-isomerase OS=Mus musculus GN=P4hb PE=1 SV=2	4.45	2.12	191.2	118543	4	3	0	6.29	509	15379
>sp|Q9CQR4|ACO13_MOUSE Acyl-coenzyme A thioesterase 13 OS=Mus musculus GN=Acot13 PE=1 SV=1	4.43	4.44	373.8	50503.1	1	1	0	7.14	140	346
>sp|Q9QYA2|TOM40_MOUSE Mitochondrial import receptor subunit TOM40 homolog OS=Mus musculus GN=Tomm40 PE=1 SV=3	4.4	4.43	327.3	73543	1	1	0	2.49	361	21939
>sp|O88451|RDH7_MOUSE Retinol dehydrogenase 7 OS=Mus musculus GN=Rdh7 PE=2 SV=1	4.4	3.1	280.4	112198	3	3	0	10.13	316	17297
>sp|Q9D880|TIM50_MOUSE Mitochondrial import inner membrane translocase subunit TIM50 OS=Mus musculus GN=Timm50 PE=1 SV=1	4.38	4.41	358.4	54506.8	1	1	0	3.12	353	21402
>sp|Q60930|VDAC2_MOUSE Voltage-dependent anion-selective channel protein 2 OS=Mus musculus GN=Vdac2 PE=1 SV=2	4.38	3.88	225.8	82570.3	2	2	0	6.78	295	23093
>sp|P50136|ODBA_MOUSE 2-oxoisovalerate dehydrogenase subunit alpha, mitochondrial OS=Mus musculus GN=Bckdha PE=1 SV=1	4.36	4.39	344.7	55999.4	1	1	0	2.04	442	14651
>sp|Q8BWQ1|UD2A3_MOUSE UDP-glucuronosyltransferase 2A3 OS=Mus musculus GN=Ugt2a3 PE=2 SV=1	4.34	3.54	287.6	251450	5	3	0	5.06	534	22851
>sp|Q9QWL7|K1C17_MOUSE Keratin, type I cytoskeletal 17 OS=Mus musculus GN=Krt17 PE=1 SV=3	4.32	2.43	180	59384.5	3	2	1	4.39	433	10670
>sp|Q9CQ62|DECR_MOUSE 2,4-dienoyl-CoA reductase, mitochondrial OS=Mus musculus GN=Decr1 PE=1 SV=1	4.31	4.32	352.6	106250	2	1	0	2.69	335	5473
>sp|Q6IFZ6|K2C1B_MOUSE Keratin, type II cytoskeletal 1b OS=Mus musculus GN=Krt77 PE=1 SV=1	4.3	4.34	326.7	71027.4	1	1	0	1.57	572	10700
>sp|Q8BL66|EEA1_MOUSE Early endosome antigen 1 OS=Mus musculus GN=Eea1 PE=2 SV=2	4.27	3.27	269.4	400061	4	4	2	1.63	1411	6344
>sp|Q14DH7|ACSS3_MOUSE Acyl-CoA synthetase short-chain family member 3, mitochondrial OS=Mus musculus GN=Acss3 PE=2 SV=2	4.21	4.24	291.5	54733.4	2	1	0	1.47	682	396
>sp|Q14DH7-2|ACSS3_MOUSE Isoform 2 of Acyl-CoA synthetase short-chain family member 3, mitochondrial OS=Mus musculus GN=Acss3
>sp|Q99JT1|GATB_MOUSE Glutamyl-tRNA(Gln) amidotransferase subunit B, mitochondrial OS=Mus musculus GN=Pet112 PE=2 SV=1	4.2	2.46	257.8	71232.8	3	2	0	3.41	557	8099
>sp|Q8BWN8|ACOT4_MOUSE Acyl-coenzyme A thioesterase 4 OS=Mus musculus GN=Acot4 PE=2 SV=1	4.11	4.15	275.1	32092	1	1	0	2.61	421	355
>sp|Q8BLF1|ADCL1_MOUSE Neutral cholesterol ester hydrolase 1 OS=Mus musculus GN=Nceh1 PE=1 SV=1	4.11	4.14	266.4	22564.4	1	1	0	2.94	408	510
>sp|Q8R164|BPHL_MOUSE Valacyclovir hydrolase OS=Mus musculus GN=Bphl PE=2 SV=1	4.09	4.11	281.9	31184.8	1	1	0	4.12	291	2117
>sp|Q8CFX1|G6PE_MOUSE GDH/6PGL endoplasmic bifunctional protein OS=Mus musculus GN=H6pd PE=2 SV=2	4.07	3.27	282.5	191083	4	3	0	3.42	789	8005
>sp|Q9DD20|MET7B_MOUSE Methyltransferase-like protein 7B OS=Mus musculus GN=Mettl7b PE=2 SV=2	3.95	3.97	237.2	24270.4	1	1	0	4.92	244	12651
>sp|P52480|KPYM_MOUSE Pyruvate kinase isozymes M1/M2 OS=Mus musculus GN=Pkm2 PE=1 SV=4	3.95	3.99	259.7	23270.3	1	1	0	1.88	531	11244
>sp|P52480-2|KPYM_MOUSE Isoform M1 of Pyruvate kinase isozymes M1/M2 OS=Mus musculus GN=Pkm2
>sp|Q9CQH3|NDUB5_MOUSE NADH dehydrogenase [ubiquinone] 1 beta subcomplex subunit 5, mitochondrial OS=Mus musculus GN=Ndufb5 PE=1 SV=1	3.94	3.96	224.7	21369.5	1	1	0	5.82	189	13812
>Reverse >sp|Q6P9R4|ARHGI_MOUSE Rho guanine nucleotide exchange factor 18 OS=Mus musculus GN=Arhgef18 PE=2 SV=2	3.93	3.67	291.4	411110	4	3	2	1.47	1021	25520
>Reverse >sp|Q6P9R4-2|ARHGI_MOUSE Isoform 2 of Rho guanine nucleotide exchange factor 18 OS=Mus musculus GN=Arhgef18
>sp|Q8VCU1|ES31L_MOUSE Liver carboxylesterase 31-like OS=Mus musculus GN=Gm4738 PE=2 SV=1	3.88	3.92	236	15297.9	1	1	0	2.11	568	6763
>sp|Q8VCU1-2|ES31L_MOUSE Isoform 2 of Liver carboxylesterase 31-like OS=Mus musculus GN=Gm4738
>sp|P12791|CP2BA_MOUSE Cytochrome P450 2B10 OS=Mus musculus GN=Cyp2b10 PE=1 SV=1	3.85	3.75	246	95084.9	2	2	0	3.6	500	4572
>sp|P12791-2|CP2BA_MOUSE Isoform 2 of Cytochrome P450 2B10 OS=Mus musculus GN=Cyp2b10
>sp|P23589|CAH5A_MOUSE Carbonic anhydrase 5A, mitochondrial OS=Mus musculus GN=Ca5a PE=1 SV=2	3.83	3.86	254.8	26464.4	1	1	0	3.01	299	2507
>sp|Q99JR1|SFXN1_MOUSE Sideroflexin-1 OS=Mus musculus GN=Sfxn1 PE=1 SV=3	3.82	3.85	237.6	15211.1	1	1	0	4.04	322	19117
>sp|O09173|HGD_MOUSE Homogentisate 1,2-dioxygenase OS=Mus musculus GN=Hgd PE=1 SV=2	3.77	3.8	187.8	12294.9	1	1	0	3.37	445	9236
>sp|P19783|COX41_MOUSE Cytochrome c oxidase subunit 4 isoform 1, mitochondrial OS=Mus musculus GN=Cox4i1 PE=1 SV=2	3.77	3.78	331.2	78703.1	1	1	0	4.73	169	4496
>sp|P01864|GCAB_MOUSE Ig gamma-2A chain C region secreted form OS=Mus musculus PE=1 SV=1	3.77	2.6	160.7	121964	3	3	1	7.16	335	8159
>sp|P50446|K2C6A_MOUSE Keratin, type II cytoskeletal 6A OS=Mus musculus GN=Krt6a PE=2 SV=3	3.76	3.81	239.4	33665.2	1	1	0	1.99	553	10704
>sp|Q9CZU6|CISY_MOUSE Citrate synthase, mitochondrial OS=Mus musculus GN=Cs PE=1 SV=1	3.74	3.74	269.2	318367	3	2	1	3.66	464	3812
>sp|P17439|GLCM_MOUSE Glucosylceramidase OS=Mus musculus GN=Gba PE=1 SV=1	3.73	3.77	216.2	13274.3	1	1	0	2.52	515	8350
>sp|P29758|OAT_MOUSE Ornithine aminotransferase, mitochondrial OS=Mus musculus GN=Oat PE=1 SV=1	3.69	3.73	212.5	19201.6	1	1	0	3.19	439	14624
>sp|P80315|TCPD_MOUSE T-complex protein 1 subunit delta OS=Mus musculus GN=Cct4 PE=1 SV=3	3.67	3.71	143	13446	1	1	0	2.6	539	21041
>sp|Q8VCZ9|PROD2_MOUSE Probable proline dehydrogenase 2 OS=Mus musculus GN=Prodh2 PE=2 SV=1	3.66	3.67	138.8	25818.8	2	1	0	2.85	456	16487
>sp|Q5BL07|PEX1_MOUSE Peroxisome biogenesis factor 1 OS=Mus musculus GN=Pex1 PE=1 SV=2	3.61	2.65	186.7	54635.5	3	2	0	1.79	1284	15499
>sp|Q5BL07-2|PEX1_MOUSE Isoform 2 of Peroxisome biogenesis factor 1 OS=Mus musculus GN=Pex1
>sp|Q3UV17|K22O_MOUSE Keratin, type II cytoskeletal 2 oral OS=Mus musculus GN=Krt76 PE=2 SV=1	3.61	2.01	209	197993	4	3	1	3.54	594	10699
>sp|Q99KQ4|NAMPT_MOUSE Nicotinamide phosphoribosyltransferase OS=Mus musculus GN=Nampt PE=1 SV=1	3.47	3.51	223.4	24507.8	1	1	0	2.44	491	13639
>sp|Q3U186|SYRM_MOUSE Probable arginine--tRNA ligase, mitochondrial OS=Mus musculus GN=Rars2 PE=2 SV=1	3.45	2.88	207.6	122496	3	3	0	4.67	578	20628
>sp|P16330|CN37_MOUSE 2',3'-cyclic-nucleotide 3'-phosphodiesterase OS=Mus musculus GN=Cnp PE=1 SV=3	3.41	3.04	112.6	11964.1	2	2	0	7.62	420	4184
>Reverse >sp|Q80YR4-2|ZN598_MOUSE Isoform 2 of Zinc finger protein 598 OS=Mus musculus GN=Znf598	3.38	3.45	238.3	164497	1	1	0	1.36	880	48210
>Reverse >sp|Q80YR4-3|ZN598_MOUSE Isoform 3 of Zinc finger protein 598 OS=Mus musculus GN=Znf598
>sp|P11352|GPX1_MOUSE Glutathione peroxidase 1 OS=Mus musculus GN=Gpx1 PE=1 SV=2	3.38	3.4	231.4	18769.2	1	1	0	4.48	201	8696
>sp|P97501|FMO3_MOUSE Dimethylaniline monooxygenase [N-oxide-forming] 3 OS=Mus musculus GN=Fmo3 PE=1 SV=1	3.36	2.62	219.9	103576	2	2	0	4.12	534	7691
>sp|Q60597|ODO1_MOUSE 2-oxoglutarate dehydrogenase, mitochondrial OS=Mus musculus GN=Ogdh PE=1 SV=3	3.28	3.33	359.8	89659	2	2	0	1.76	1023	14670
>sp|Q60597-2|ODO1_MOUSE Isoform 2 of 2-oxoglutarate dehydrogenase, mitochondrial OS=Mus musculus GN=Ogdh
>sp|Q60597-3|ODO1_MOUSE Isoform 3 of 2-oxoglutarate dehydrogenase, mitochondrial OS=Mus musculus GN=Ogdh
>sp|Q60597-4|ODO1_MOUSE Isoform 4 of 2-oxoglutarate dehydrogenase, mitochondrial OS=Mus musculus GN=Ogdh
>sp|Q8C1B7|SEP11_MOUSE Septin-11 OS=Mus musculus GN=Sept11 PE=1 SV=4	3.27	2.51	225.6	70592.3	2	2	0	4.18	431	19002
>sp|Q8C1B7-2|SEP11_MOUSE Isoform 2 of Septin-11 OS=Mus musculus GN=Sept11
>sp|Q8C1B7-3|SEP11_MOUSE Isoform 3 of Septin-11 OS=Mus musculus GN=Sept11
>sp|Q9DBL7|COASY_MOUSE Bifunctional coenzyme A synthase OS=Mus musculus GN=Coasy PE=1 SV=2	3.2	3.24	308.8	54839.9	1	1	0	1.6	563	4361
>sp|Q99L13|3HIDH_MOUSE 3-hydroxyisobutyrate dehydrogenase, mitochondrial OS=Mus musculus GN=Hibadh PE=2 SV=1	3.11	3.14	133	9266.1	1	1	0	4.78	335	42
>sp|P49182|HEP2_MOUSE Heparin cofactor 2 OS=Mus musculus GN=Serpind1 PE=1 SV=1	3.06	1.6	181	74345	3	3	0	4.81	478	9203
>sp|Q6XVG2|CP254_MOUSE Cytochrome P450 2C54 OS=Mus musculus GN=Cyp2c54 PE=2 SV=1	3.04	3.08	392.2	113821	1	1	0	1.84	490	4562
>sp|Q8K1C0|ANGE2_MOUSE Protein angel homolog 2 OS=Mus musculus GN=Angel2 PE=2 SV=1	3.04	2.29	191.3	84605.7	2	2	0	3.86	544	909
>sp|Q8K1C0-2|ANGE2_MOUSE Isoform 2 of Protein angel homolog 2 OS=Mus musculus GN=Angel2
>sp|Q8K1C0-3|ANGE2_MOUSE Isoform 3 of Protein angel homolog 2 OS=Mus musculus GN=Angel2
>sp|Q9Z2I8|SUCB2_MOUSE Succinyl-CoA ligase [GDP-forming] subunit beta, mitochondrial OS=Mus musculus GN=Suclg2 PE=2 SV=3	2.98	2.02	200.7	40358.5	2	2	0	4.62	433	20453
>sp|Q9Z2I8-2|SUCB2_MOUSE Isoform 2 of Succinyl-CoA ligase [GDP-forming] subunit beta, mitochondrial OS=Mus musculus GN=Suclg2
>sp|Q9D2G2|ODO2_MOUSE Dihydrolipoyllysine-residue succinyltransferase component of 2-oxoglutarate dehydrogenase complex, mitochondrial OS=Mus musculus GN=Dlst PE=1 SV=1	2.98	2.86	219.5	54007.6	2	2	0	3.52	454	14674
>sp|Q9QXC1|FETUB_MOUSE Fetuin-B OS=Mus musculus GN=Fetub PE=1 SV=1	2.92	2.95	66.8	9759.9	1	1	0	3.61	388	7506
>sp|Q9DCN2|NB5R3_MOUSE NADH-cytochrome b5 reductase 3 OS=Mus musculus GN=Cyb5r3 PE=1 SV=3	2.89	2.91	308.1	66597	1	1	0	2.66	301	13683
>sp|Q9DCN2-2|NB5R3_MOUSE Isoform 2 of NADH-cytochrome b5 reductase 3 OS=Mus musculus GN=Cyb5r3
>sp|O55125|NIPS1_MOUSE Protein NipSnap homolog 1 OS=Mus musculus GN=Nipsnap1 PE=1 SV=1	2.84	1.74	255	133089	2	2	0	5.28	284	14065
>sp|Q64133|AOFA_MOUSE Amine oxidase [flavin-containing] A OS=Mus musculus GN=Maoa PE=1 SV=3	2.84	2.88	167.2	14545.2	1	1	0	2.09	526	1075
>sp|Q99PG0|AAAD_MOUSE Arylacetamide deacetylase OS=Mus musculus GN=Aadac PE=1 SV=3	2.82	2.01	184.2	67467.1	2	2	0	5.03	398	123
>sp|Q9CY62|RN181_MOUSE E3 ubiquitin-protein ligase RNF181 OS=Mus musculus GN=Rnf181 PE=2 SV=1	2.82	2.79	284.6	236238	3	1	0	4.85	165	17871
>sp|Q9CY62-2|RN181_MOUSE Isoform 2 of E3 ubiquitin-protein ligase RNF181 OS=Mus musculus GN=Rnf181
>sp|P20852|CP2A5_MOUSE Cytochrome P450 2A5 OS=Mus musculus GN=Cyp2a5 PE=2 SV=1	2.77	2.8	170.5	16366	1	1	0	2.23	494	4569
>Reverse >sp|Q9CZW6|RN146_MOUSE E3 ubiquitin-protein ligase RNF146 OS=Mus musculus GN=Rnf146 PE=1 SV=2	2.76	2.79	283.1	99792.1	2	2	0	4.74	359	42067
>sp|Q64459|CP3AB_MOUSE Cytochrome P450 3A11 OS=Mus musculus GN=Cyp3a11 PE=1 SV=1	2.76	2.8	176.3	21705.3	1	1	0	1.98	504	4591
>sp|P17897|LYZ1_MOUSE Lysozyme C-1 OS=Mus musculus GN=Lyz1 PE=1 SV=1	2.75	2.76	159.8	11306.2	1	1	0	8.11	148	12119
>Reverse >sp|Q8K1S1|LGI4_MOUSE Leucine-rich repeat LGI family member 4 OS=Mus musculus GN=Lgi4 PE=1 SV=1	2.72	2.76	257.9	50204.2	1	1	0	1.86	537	35825
>sp|Q91WL5|CP4CA_MOUSE Cytochrome P450 4A12A OS=Mus musculus GN=Cyp4a12a PE=2 SV=2	2.71	2.75	212.7	26208.1	1	1	0	2.36	508	4599
>sp|P50172|DHI1_MOUSE Corticosteroid 11-beta-dehydrogenase isozyme 1 OS=Mus musculus GN=Hsd11b1 PE=1 SV=3	2.7	2.19	217.2	230567	5	3	0	8.56	292	5630
>sp|A2AJN7|S4A11_MOUSE Sodium bicarbonate transporter-like protein 11 OS=Mus musculus GN=Slc4a11 PE=2 SV=1	2.66	2.72	271.9	81703.4	1	1	0	0.93	862	18606
>sp|Q91X34|BAAT_MOUSE Bile acid-CoA:amino acid N-acyltransferase OS=Mus musculus GN=Baat PE=1 SV=1	2.65	1.69	198.4	100075	3	3	0	4.52	420	1823
>sp|Q9CQX2|CYB5B_MOUSE Cytochrome b5 type B OS=Mus musculus GN=Cyb5b PE=1 SV=1	2.64	2.65	166.1	18511.5	1	1	0	8.22	146	5200
>sp|Q60932|VDAC1_MOUSE Voltage-dependent anion-selective channel protein 1 OS=Mus musculus GN=Vdac1 PE=1 SV=3	2.63	1.8	178.7	40595.9	2	2	0	7.09	296	23091
>sp|Q60932-2|VDAC1_MOUSE Isoform Mt-VDAC1 of Voltage-dependent anion-selective channel protein 1 OS=Mus musculus GN=Vdac1
>sp|P07356|ANXA2_MOUSE Annexin A2 OS=Mus musculus GN=Anxa2 PE=1 SV=2	2.57	2.6	120.7	13512.7	1	1	0	2.95	339	1063
>sp|P80313|TCPH_MOUSE T-complex protein 1 subunit eta OS=Mus musculus GN=Cct7 PE=1 SV=1	2.57	2.61	256.6	28342.4	1	1	0	1.29	544	21044
>Reverse >sp|Q8BX51|SGCZ_MOUSE Zeta-sarcoglycan OS=Mus musculus GN=Sgcz PE=2 SV=1	2.56	2.59	337.5	32543.6	1	1	0	3.22	311	43357
>Reverse >sp|Q8BX51-2|SGCZ_MOUSE Isoform 2 of Zeta-sarcoglycan OS=Mus musculus GN=Sgcz
>sp|Q6ZQJ5|DNA2L_MOUSE DNA2-like helicase OS=Mus musculus GN=Dna2 PE=2 SV=2	2.56	2.62	330.6	108900	2	2	0	1.41	1062	5852
>sp|Q6ZQJ5-2|DNA2L_MOUSE Isoform 2 of DNA2-like helicase OS=Mus musculus GN=Dna2
>sp|Q9CZ13|QCR1_MOUSE Cytochrome b-c1 complex subunit 1, mitochondrial OS=Mus musculus GN=Uqcrc1 PE=1 SV=2	2.51	2.09	212.1	134247	3	3	0	5.21	480	16898
>sp|Q3ULZ2|FHDC1_MOUSE FH2 domain-containing protein 1 OS=Mus musculus GN=Fhdc1 PE=2 SV=3	2.48	2.52	134	58437.9	2	2	1	1.83	1149	7587
>sp|Q8BP40|PPA6_MOUSE Lysophosphatidic acid phosphatase type 6 OS=Mus musculus GN=Acp6 PE=2 SV=1	2.44	2.47	247.6	40412.8	1	1	0	2.39	418	16227
>Reverse >sp|Q7TT37|ELP1_MOUSE Elongator complex protein 1 OS=Mus musculus GN=Ikbkap PE=2 SV=2	2.41	2.51	226	38175.5	1	1	0	0.9	1333	30743
>sp|Q9DCY0|KEG1_MOUSE Glycine N-acyltransferase-like protein Keg1 OS=Mus musculus GN=Keg1 PE=1 SV=1	2.38	2.38	201	90043.7	2	2	0	7.46	295	11014
>sp|Q922Q8|LRC59_MOUSE Leucine-rich repeat-containing protein 59 OS=Mus musculus GN=Lrrc59 PE=2 SV=1	2.33	2.33	176.2	48031.7	2	1	0	2.93	307	11903
>sp|P62984|RL40_MOUSE Ubiquitin-60S ribosomal protein L40 OS=Mus musculus GN=Uba52 PE=1 SV=2	2.3	2.31	89.6	9559.5	1	1	0	12.5	128	17741
>sp|P62983|RS27A_MOUSE Ubiquitin-40S ribosomal protein S27a OS=Mus musculus GN=Rps27a PE=1 SV=2
>sp|P0CG49|UBB_MOUSE Polyubiquitin-B OS=Mus musculus GN=Ubb PE=1 SV=1
>sp|P0CG50|UBC_MOUSE Polyubiquitin-C OS=Mus musculus GN=Ubc PE=1 SV=2
>sp|UBIQ_HUMAN|(Common contaminant protein)
>sp|Q99LP6|GRPE1_MOUSE GrpE protein homolog 1, mitochondrial OS=Mus musculus GN=Grpel1 PE=1 SV=1	2.3	2.29	221.1	60186.5	2	1	0	4.15	217	8807
>sp|P16277|BLK_MOUSE Tyrosine-protein kinase Blk OS=Mus musculus GN=Blk PE=1 SV=4	2.29	2.31	189	30778.1	2	1	1	2.4	499	2052
>sp|P25911|LYN_MOUSE Tyrosine-protein kinase Lyn OS=Mus musculus GN=Lyn PE=1 SV=4
>sp|P25911-2|LYN_MOUSE Isoform 2 of Tyrosine-protein kinase Lyn OS=Mus musculus GN=Lyn
>sp|Q9DB20|ATPO_MOUSE ATP synthase subunit O, mitochondrial OS=Mus musculus GN=Atp5o PE=1 SV=1	2.27	2.29	207.2	27931.3	1	1	0	5.16	213	1678
>Reverse >sp|P11531|DMD_MOUSE Dystrophin OS=Mus musculus GN=Dmd PE=1 SV=3	2.27	2.55	221.9	78556.9	2	2	1	0.49	3678	30034
>sp|P58281|OPA1_MOUSE Dynamin-like 120 kDa protein, mitochondrial OS=Mus musculus GN=Opa1 PE=1 SV=1	2.26	2.33	213.2	41448.3	1	1	0	1.15	960	14792
>sp|P58281-2|OPA1_MOUSE Isoform 2 of Dynamin-like 120 kDa protein, mitochondrial OS=Mus musculus GN=Opa1
>sp|O54749|CP2J5_MOUSE Cytochrome P450 2J5 OS=Mus musculus GN=Cyp2j5 PE=2 SV=1	2.26	2.29	226.8	38419.3	1	1	0	2.2	501	4582
>sp|P59672|ANS1A_MOUSE Ankyrin repeat and SAM domain-containing protein 1A OS=Mus musculus GN=Anks1a PE=1 SV=3	2.24	2.33	113.6	9049.3	1	1	1	1.13	1150	1046
>sp|P59672-2|ANS1A_MOUSE Isoform 2 of Ankyrin repeat and SAM domain-containing protein 1A OS=Mus musculus GN=Anks1a
>Reverse >sp|Q62261|SPTB2_MOUSE Spectrin beta chain, brain 1 OS=Mus musculus GN=Sptbn1 PE=1 SV=2	2.16	2	318.8	155543	3	3	0	1.27	2363	44300
>Reverse >sp|Q62261-2|SPTB2_MOUSE Isoform 2 of Spectrin beta chain, brain 1 OS=Mus musculus GN=Sptbn1
>sp|O35945|AL1A7_MOUSE Aldehyde dehydrogenase, cytosolic 1 OS=Mus musculus GN=Aldh1a7 PE=2 SV=1	2.15	2.19	214	24498	1	1	0	1.8	501	753
>sp|Q99KB8|GLO2_MOUSE Hydroxyacylglutathione hydrolase, mitochondrial OS=Mus musculus GN=Hagh PE=2 SV=2	2.14	2.14	205.2	42868.1	2	1	0	3.88	309	8371
>sp|Q99KB8-2|GLO2_MOUSE Isoform 2 of Hydroxyacylglutathione hydrolase, mitochondrial OS=Mus musculus GN=Hagh
>sp|O35226|PSMD4_MOUSE 26S proteasome non-ATPase regulatory subunit 4 OS=Mus musculus GN=Psmd4 PE=1 SV=1	2.14	2.16	266.4	41560.5	1	1	0	2.93	376	16660
>sp|O35226-2|PSMD4_MOUSE Isoform Rpn10B of 26S proteasome non-ATPase regulatory subunit 4 OS=Mus musculus GN=Psmd4
>sp|O35226-3|PSMD4_MOUSE Isoform Rpn10C of 26S proteasome non-ATPase regulatory subunit 4 OS=Mus musculus GN=Psmd4
>sp|O35226-4|PSMD4_MOUSE Isoform Rpn10D of 26S proteasome non-ATPase regulatory subunit 4 OS=Mus musculus GN=Psmd4
>sp|O35226-5|PSMD4_MOUSE Isoform Rpn10E of 26S proteasome non-ATPase regulatory subunit 4 OS=Mus musculus GN=Psmd4
>sp|Q91WT9|CBS_MOUSE Cystathionine beta-synthase OS=Mus musculus GN=Cbs PE=2 SV=3	1.99	2.04	158.7	25556	1	1	0	1.96	561	2775
>sp|Q91WT9-2|CBS_MOUSE Isoform 2 of Cystathionine beta-synthase OS=Mus musculus GN=Cbs
>sp|Q8BH00|AL8A1_MOUSE Aldehyde dehydrogenase family 8 member A1 OS=Mus musculus GN=Aldh8a1 PE=1 SV=1	1.99	0.82	172.6	76786.7	4	4	1	5.95	487	769
>sp|Q9Z2Z6|MCAT_MOUSE Mitochondrial carnitine/acylcarnitine carrier protein OS=Mus musculus GN=Slc25a20 PE=1 SV=1	1.98	0.84	211.7	155299	4	3	0	9.97	301	12444
>Reverse >sp|P97433|RGNEF_MOUSE Rho-guanine nucleotide exchange factor OS=Mus musculus GN=Rgnef PE=1 SV=1	1.97	2.08	309.9	347912	2	1	0	0.47	1693	41690
>Reverse >sp|P97433-2|RGNEF_MOUSE Isoform 2 of Rho-guanine nucleotide exchange factor OS=Mus musculus GN=Rgnef
>sp|Q8VDD5|MYH9_MOUSE Myosin-9 OS=Mus musculus GN=Myh9 PE=1 SV=4	1.96	2.11	219.7	46971.7	2	2	0	1.07	1960	13453
>sp|Q9EQH2|ERAP1_MOUSE Endoplasmic reticulum aminopeptidase 1 OS=Mus musculus GN=Erap1 PE=2 SV=2	1.9	1.13	217.7	44278.7	2	2	0	2.37	930	6697
>Reverse >sp|Q8BU03|PWP2_MOUSE Periodic tryptophan protein 2 homolog OS=Mus musculus GN=Pwp2 PE=1 SV=1	1.82	1.89	275.5	106495	1	1	1	0.98	919	41080
>sp|Q9DBW0|CP4V2_MOUSE Cytochrome P450 4V2 OS=Mus musculus GN=Cyp4v2 PE=1 SV=1	1.81	1.85	42.4	7232.5	1	1	0	2.67	525	4602
>sp|Q9DBG6|RPN2_MOUSE Dolichyl-diphosphooligosaccharide--protein glycosyltransferase subunit 2 OS=Mus musculus GN=Rpn2 PE=2 SV=1	1.81	1.85	55.2	13653.3	2	2	1	3.17	631	18093
>sp|Q5FW57|GLYAL_MOUSE Glycine N-acyltransferase-like protein OS=Mus musculus GN=Gm4952 PE=1 SV=2	1.78	1.61	225.1	166644	2	2	0	5.41	296	8423
>sp|Q9D240|PKHJ1_MOUSE Pleckstrin homology domain-containing family J member 1 OS=Mus musculus GN=Plekhj1 PE=2 SV=1	1.7	1.69	214.9	96181.9	2	1	0	4.27	164	15876
>sp|P11714|CP2D9_MOUSE Cytochrome P450 2D9 OS=Mus musculus GN=Cyp2d9 PE=1 SV=2	1.68	1.72	226.1	18319.8	1	1	0	1.59	504	4576
>sp|P24456|CP2DA_MOUSE Cytochrome P450 2D10 OS=Mus musculus GN=Cyp2d10 PE=2 SV=2
>sp|P33267|CP2F2_MOUSE Cytochrome P450 2F2 OS=Mus musculus GN=Cyp2f2 PE=2 SV=1	1.67	1.34	268.8	75026.1	2	2	0	3.46	491	4581
>sp|P11276|FINC_MOUSE Fibronectin OS=Mus musculus GN=Fn1 PE=1 SV=3	1.66	1.85	45.4	9456.3	1	1	0	0.52	2477	7619
>Reverse >sp|Q9DBS5|KLC4_MOUSE Kinesin light chain 4 OS=Mus musculus GN=Klc4 PE=1 SV=1	1.61	1.66	263.4	40282.3	1	1	0	1.78	619	35335
>Reverse >sp|Q60673|PTPRN_MOUSE Receptor-type tyrosine-protein phosphatase-like N OS=Mus musculus GN=Ptprn PE=2 SV=2	1.6	1.01	272.5	110063	2	2	0	2.25	979	41007
>sp|Q6IFX2|K1C42_MOUSE Keratin, type I cytoskeletal 42 OS=Mus musculus GN=Krt42 PE=1 SV=1	1.57	1.6	153.3	24412.2	1	1	0	1.99	452	10682
>sp|Q6ZPZ3|ZC3H4_MOUSE Zinc finger CCCH domain-containing protein 4 OS=Mus musculus GN=Zc3h4 PE=1 SV=2	1.57	1.67	266.2	75123.3	1	1	0	0.61	1304	23708
>sp|Q6ZPZ3-2|ZC3H4_MOUSE Isoform 2 of Zinc finger CCCH domain-containing protein 4 OS=Mus musculus GN=Zc3h4
>Reverse >sp|P98083|SHC1_MOUSE SHC-transforming protein 1 OS=Mus musculus GN=Shc1 PE=1 SV=3	1.56	1.48	418.4	313298	8	1	0	1.38	579	43453
>Reverse >sp|P98083-2|SHC1_MOUSE Isoform p52Shc of SHC-transforming protein 1 OS=Mus musculus GN=Shc1
>Reverse >sp|P98083-3|SHC1_MOUSE Isoform p47Shc of SHC-transforming protein 1 OS=Mus musculus GN=Shc1
>Reverse >sp|Q7M761|OVCH2_MOUSE Ovochymase-2 OS=Mus musculus GN=Ovch2 PE=2 SV=1	1.56	1.6	130.4	20023	1	1	0	1.97	609	39123
>Reverse >sp|Q7M761-2|OVCH2_MOUSE Isoform 2 of Ovochymase-2 OS=Mus musculus GN=Ovch2
>Reverse >sp|O08648|M3K4_MOUSE Mitogen-activated protein kinase kinase kinase 4 OS=Mus musculus GN=Map3k4 PE=1 SV=2	1.52	1.46	281.3	496883	10	2	0	1	1597	36369
>Reverse >sp|O08648-2|M3K4_MOUSE Isoform B of Mitogen-activated protein kinase kinase kinase 4 OS=Mus musculus GN=Map3k4
>sp|Q9D1D4|TMEDA_MOUSE Transmembrane emp24 domain-containing protein 10 OS=Mus musculus GN=Tmed10 PE=2 SV=1	1.47	1.47	228.4	87428.8	2	1	0	3.2	219	21715
>sp|Q9D1D4-2|TMEDA_MOUSE Isoform 2 of Transmembrane emp24 domain-containing protein 10 OS=Mus musculus GN=Tmed10
>Reverse >sp|Q5XJE5|LEO1_MOUSE RNA polymerase-associated protein LEO1 OS=Mus musculus GN=Leo1 PE=1 SV=2	1.47	1.47	228.4	192768	4	3	2	12.59	667	35803
>Reverse >sp|Q8BL66|EEA1_MOUSE Early endosome antigen 1 OS=Mus musculus GN=Eea1 PE=2 SV=2	1.46	1.55	211	138698	3	3	0	1.49	1411	30562
>sp|Q80VW7|AKNA_MOUSE AT-hook-containing transcription factor OS=Mus musculus GN=Akna PE=2 SV=1	1.45	1.53	206.1	135300	2	2	0	1.21	1404	739
>sp|Q80VW7-3|AKNA_MOUSE Isoform 3 of AT-hook-containing transcription factor OS=Mus musculus GN=Akna
>sp|Q80VW7-4|AKNA_MOUSE Isoform 4 of AT-hook-containing transcription factor OS=Mus musculus GN=Akna
>sp|Q9EQ06|DHB11_MOUSE Estradiol 17-beta-dehydrogenase 11 OS=Mus musculus GN=Hsd17b11 PE=2 SV=1	1.42	1.4	237.3	120575	3	2	0	5.37	298	5609
>sp|Q9EQ06-2|DHB11_MOUSE Isoform 2 of Estradiol 17-beta-dehydrogenase 11 OS=Mus musculus GN=Hsd17b11
>sp|Q8VCR2|DHB13_MOUSE 17-beta-hydroxysteroid dehydrogenase 13 OS=Mus musculus GN=Hsd17b13 PE=1 SV=1
>sp|Q8VCR2-2|DHB13_MOUSE Isoform 2 of 17-beta-hydroxysteroid dehydrogenase 13 OS=Mus musculus GN=Hsd17b13
>sp|P70696|H2B1A_MOUSE Histone H2B type 1-A OS=Mus musculus GN=Hist1h2ba PE=2 SV=3	1.39	1.4	233	36316.9	1	1	0	7.09	127	8972
>sp|Q64475|H2B1B_MOUSE Histone H2B type 1-B OS=Mus musculus GN=Hist1h2bb PE=1 SV=3
>sp|Q6ZWY9|H2B1C_MOUSE Histone H2B type 1-C/E/G OS=Mus musculus GN=Hist1h2bc PE=1 SV=3
>sp|P10853|H2B1F_MOUSE Histone H2B type 1-F/J/L OS=Mus musculus GN=Hist1h2bf PE=1 SV=2
>sp|Q64478|H2B1H_MOUSE Histone H2B type 1-H OS=Mus musculus GN=Hist1h2bh PE=1 SV=3
>sp|Q8CGP1|H2B1K_MOUSE Histone H2B type 1-K OS=Mus musculus GN=Hist1h2bk PE=1 SV=3
>sp|P10854|H2B1M_MOUSE Histone H2B type 1-M OS=Mus musculus GN=Hist1h2bm PE=1 SV=2
>sp|Q8CGP2|H2B1P_MOUSE Histone H2B type 1-P OS=Mus musculus GN=Hist1h2bp PE=1 SV=3
>sp|Q8CGP2-2|H2B1P_MOUSE Isoform 2 of Histone H2B type 1-P OS=Mus musculus GN=Hist1h2bp
>sp|Q64525|H2B2B_MOUSE Histone H2B type 2-B OS=Mus musculus GN=Hist2h2bb PE=1 SV=3
>sp|Q64524|H2B2E_MOUSE Histone H2B type 2-E OS=Mus musculus GN=Hist2h2be PE=1 SV=3
>sp|Q9D2U9|H2B3A_MOUSE Histone H2B type 3-A OS=Mus musculus GN=Hist3h2ba PE=1 SV=3
>sp|Q8CGP0|H2B3B_MOUSE Histone H2B type 3-B OS=Mus musculus GN=Hist3h2bb PE=1 SV=3
>sp|Q64481|CP3AG_MOUSE Cytochrome P450 3A16 OS=Mus musculus GN=Cyp3a16 PE=2 SV=2	1.36	1.39	110.6	51374.2	2	2	2	3.77	504	4593
>sp|P01899|HA11_MOUSE H-2 class I histocompatibility antigen, D-B alpha chain OS=Mus musculus GN=H2-D1 PE=1 SV=2	1.35	1.37	169.9	40104.8	1	1	0	2.49	362	8997
>sp|P01900|HA12_MOUSE H-2 class I histocompatibility antigen, D-D alpha chain OS=Mus musculus GN=H2-D1 PE=1 SV=1
>sp|P14426|HA13_MOUSE H-2 class I histocompatibility antigen, D-K alpha chain OS=Mus musculus GN=H2-D1 PE=1 SV=1
>sp|P14427|HA14_MOUSE H-2 class I histocompatibility antigen, D-P alpha chain OS=Mus musculus GN=H2-D1 PE=2 SV=1
>sp|P06339|HA15_MOUSE H-2 class I histocompatibility antigen, D-37 alpha chain OS=Mus musculus GN=H2-T23 PE=1 SV=1
>sp|P14429|HA17_MOUSE H-2 class I histocompatibility antigen, Q7 alpha chain OS=Mus musculus GN=H2-Q7 PE=1 SV=1
>sp|P14430|HA18_MOUSE H-2 class I histocompatibility antigen, Q8 alpha chain OS=Mus musculus GN=H2-Q8 PE=2 SV=1
>sp|P14431|HA19_MOUSE H-2 class I histocompatibility antigen, Q9 alpha chain (Fragment) OS=Mus musculus GN=H2-Q9 PE=2 SV=1
>sp|P01901|HA1B_MOUSE H-2 class I histocompatibility antigen, K-B alpha chain OS=Mus musculus GN=H2-K1 PE=1 SV=1
>sp|P04223|HA1K_MOUSE H-2 class I histocompatibility antigen, K-K alpha chain OS=Mus musculus GN=H2-K1 PE=1 SV=1
>sp|P04223-2|HA1K_MOUSE Isoform 2 of H-2 class I histocompatibility antigen, K-K alpha chain OS=Mus musculus GN=H2-K1
>sp|P01897|HA1L_MOUSE H-2 class I histocompatibility antigen, L-D alpha chain OS=Mus musculus GN=H2-L PE=1 SV=2
>sp|P14428|HA1Q_MOUSE H-2 class I histocompatibility antigen, K-Q alpha chain (Fragment) OS=Mus musculus GN=H2-K1 PE=2 SV=1
>sp|P03991|HA1W_MOUSE H-2 class I histocompatibility antigen, K-W28 alpha chain OS=Mus musculus GN=H2-K1 PE=1 SV=2
>sp|Q9WUR2|ECI2_MOUSE Enoyl-CoA delta isomerase 2, mitochondrial OS=Mus musculus GN=Eci2 PE=1 SV=2	1.31	1.34	161.9	11900.2	1	1	0	2.3	391	6305
>sp|Q9WUR2-2|ECI2_MOUSE Isoform 2 of Enoyl-CoA delta isomerase 2, mitochondrial OS=Mus musculus GN=Eci2
>sp|P32921|SYWC_MOUSE Tryptophan--tRNA ligase, cytoplasmic OS=Mus musculus GN=Wars PE=1 SV=2	1.31	0.88	150.4	37262.7	2	2	0	5.2	481	20685
>sp|P32921-2|SYWC_MOUSE Isoform 2 of Tryptophan--tRNA ligase, cytoplasmic OS=Mus musculus GN=Wars
>sp|Q5DU56-4|NLRC3_MOUSE Isoform 4 of Protein NLRC3 OS=Mus musculus GN=Nlrc3	1.29	0.66	134.3	46743.4	2	2	1	4.81	312	14122
>sp|P23780|BGAL_MOUSE Beta-galactosidase OS=Mus musculus GN=Glb1 PE=2 SV=1	1.29	1.34	136.9	18921.8	1	1	0	1.85	647	1997
>sp|Q810A7|DDX42_MOUSE ATP-dependent RNA helicase DDX42 OS=Mus musculus GN=Ddx42 PE=1 SV=3	1.27	1.34	187.5	37543.6	1	1	0	1.08	929	5449
>sp|Q810A7-2|DDX42_MOUSE Isoform 2 of ATP-dependent RNA helicase DDX42 OS=Mus musculus GN=Ddx42
>sp|Q8VIM9|IRGQ_MOUSE Immunity-related GTPase family Q protein OS=Mus musculus GN=Irgq PE=2 SV=1	1.27	1.31	205	55684.3	1	1	1	1.54	583	10276
>sp|P36552|HEM6_MOUSE Coproporphyrinogen-III oxidase, mitochondrial OS=Mus musculus GN=Cpox PE=1 SV=2	1.27	1.3	205.6	15482.8	1	1	0	2.03	443	9194
>sp|Q9D3R5|F187A_MOUSE Ig-like V-type domain-containing protein FAM187A OS=Mus musculus GN=Fam187a PE=2 SV=1	1.23	1.24	177.7	56900.6	2	1	0	1.44	417	7066
>Reverse >sp|Q9CXF4|TBC15_MOUSE TBC1 domain family member 15 OS=Mus musculus GN=Tbc1d15 PE=1 SV=1	1.22	1.27	268	120978	1	1	0	1.19	671	45134
>sp|O88986|KBL_MOUSE 2-amino-3-ketobutyrate coenzyme A ligase, mitochondrial OS=Mus musculus GN=Gcat PE=1 SV=2	1.21	1.24	112.6	57068.1	1	1	0	3.37	416	10787
>Reverse >sp|Q6ZQ73|CAND2_MOUSE Cullin-associated NEDD8-dissociated protein 2 OS=Mus musculus GN=Cand2 PE=1 SV=2	1.2	1.3	218.6	23253.5	1	1	0	0.73	1235	26785
>Reverse >sp|Q9ER41|TOR1B_MOUSE Torsin-1B OS=Mus musculus GN=Tor1b PE=2 SV=2	1.2	1.23	299.5	212281	1	1	0	2.38	336	46177

## Sheet: Consolidated Data
Description	UniProt ID	Total spectral counts	# AA's in protein	Normalized spectral abundance factor
>sp|P47738|ALDH2_MOUSE Aldehyde dehydrogenase, mitochondrial OS=Mus musculus GN=Aldh2 PE=1 SV=1	P47738	1801	519	3.47013
>sp|Q9EQ20|MMSA_MOUSE Methylmalonate-semialdehyde dehydrogenase [acylating], mitochondrial OS=Mus musculus GN=Aldh6a1 PE=1 SV=1	Q9EQ20	733	535	1.37009
>sp|Q03265|ATPA_MOUSE ATP synthase subunit alpha, mitochondrial OS=Mus musculus GN=Atp5a1 PE=1 SV=1	Q03265	725	553	1.31103
>sp|P26443|DHE3_MOUSE Glutamate dehydrogenase 1, mitochondrial OS=Mus musculus GN=Glud1 PE=1 SV=1	P26443	463	558	0.829749
>sp|Q9CZS1|AL1B1_MOUSE Aldehyde dehydrogenase X, mitochondrial OS=Mus musculus GN=Aldh1b1 PE=2 SV=1	Q9CZS1	428	519	0.824663
>sp|P24270|CATA_MOUSE Catalase OS=Mus musculus GN=Cat PE=1 SV=4	P24270	368	527	0.698292
>sp|O08749|DLDH_MOUSE Dihydrolipoyl dehydrogenase, mitochondrial OS=Mus musculus GN=Dld PE=1 SV=2	O08749	305	509	0.599214
>sp|Q9CPY7|AMPL_MOUSE Cytosol aminopeptidase OS=Mus musculus GN=Lap3 PE=1 SV=3	Q9CPY7	221	519	0.425819
>sp|Q9JLJ2|AL9A1_MOUSE 4-trimethylaminobutyraldehyde dehydrogenase OS=Mus musculus GN=Aldh9a1 PE=1 SV=1	Q9JLJ2	209	494	0.423077
>sp|TRYP_PIG|(Common contaminant protein)	TRYP_PIG	88	231	0.380952
>sp|K2C1_HUMAN|(Common contaminant protein)	K2C1_HUMAN	190	643	0.29549
>sp|P54869|HMCS2_MOUSE Hydroxymethylglutaryl-CoA synthase, mitochondrial OS=Mus musculus GN=Hmgcs2 PE=1 SV=2	P54869	143	508	0.281496
>sp|Q8C196|CPSM_MOUSE Carbamoyl-phosphate synthase [ammonia], mitochondrial OS=Mus musculus GN=Cps1 PE=1 SV=2	Q8C196	420	1500	0.28
>sp|Q8CHT0|AL4A1_MOUSE Delta-1-pyrroline-5-carboxylate dehydrogenase, mitochondrial OS=Mus musculus GN=Aldh4a1 PE=1 SV=3	Q8CHT0	148	562	0.263345
>sp|Q8BWF0|SSDH_MOUSE Succinate-semialdehyde dehydrogenase, mitochondrial OS=Mus musculus GN=Aldh5a1 PE=1 SV=1	Q8BWF0	135	523	0.258126
>sp|P11725|OTC_MOUSE Ornithine carbamoyltransferase, mitochondrial OS=Mus musculus GN=Otc PE=1 SV=1	P11725	78	354	0.220339
>sp|Q8VCT4|CES3_MOUSE Carboxylesterase 3 OS=Mus musculus GN=Ces3 PE=1 SV=1	Q8VCT4	123	565	0.217699
>sp|Q99LB7|SARDH_MOUSE Sarcosine dehydrogenase, mitochondrial OS=Mus musculus GN=Sardh PE=1 SV=1	Q99LB7	194	919	0.211099
>sp|P50544|ACADV_MOUSE Very long-chain specific acyl-CoA dehydrogenase, mitochondrial OS=Mus musculus GN=Acadvl PE=1 SV=3	P50544	138	656	0.210366
>sp|K1C10_HUMAN|(Common contaminant protein)	K1C10_HUMAN	124	593	0.209106
>sp|P27773|PDIA3_MOUSE Protein disulfide-isomerase A3 OS=Mus musculus GN=Pdia3 PE=1 SV=2	P27773	102	505	0.20198
>sp|K22E_HUMAN|(Common contaminant protein)	K22E_HUMAN	129	645	0.2
>sp|Q99MN9|PCCB_MOUSE Propionyl-CoA carboxylase beta chain, mitochondrial OS=Mus musculus GN=Pccb PE=1 SV=2	Q99MN9	103	541	0.190388
>sp|Q01339|APOH_MOUSE Beta-2-glycoprotein 1 OS=Mus musculus GN=Apoh PE=1 SV=1	Q01339	62	345	0.17971
>sp|P51174|ACADL_MOUSE Long-chain specific acyl-CoA dehydrogenase, mitochondrial OS=Mus musculus GN=Acadl PE=2 SV=2	P51174	76	430	0.176744
>sp|Q8BGH2|SAM50_MOUSE Sorting and assembly machinery component 50 homolog OS=Mus musculus GN=Samm50 PE=1 SV=1	Q8BGH2	80	469	0.170576
>sp|Q8BGT5|ALAT2_MOUSE Alanine aminotransferase 2 OS=Mus musculus GN=Gpt2 PE=2 SV=1	Q8BGT5	88	522	0.168582
>sp|K1C9_HUMAN|(Common contaminant protein)	K1C9_HUMAN	105	623	0.168539
>sp|Q8K2B3|DHSA_MOUSE Succinate dehydrogenase [ubiquinone] flavoprotein subunit, mitochondrial OS=Mus musculus GN=Sdha PE=1 SV=1	Q8K2B3	110	664	0.165663
>sp|P20060|HEXB_MOUSE Beta-hexosaminidase subunit beta OS=Mus musculus GN=Hexb PE=2 SV=2	P20060	86	536	0.160448
>sp|Q3ULD5|MCCB_MOUSE Methylcrotonoyl-CoA carboxylase beta chain, mitochondrial OS=Mus musculus GN=Mccc2 PE=2 SV=1	Q3ULD5	89	563	0.158082
>sp|Q3UEG6|AGT2_MOUSE Alanine--glyoxylate aminotransferase 2, mitochondrial OS=Mus musculus GN=Agxt2 PE=2 SV=1	Q3UEG6	80	513	0.155945
>sp|Q9JJL8|SYSM_MOUSE Serine--tRNA ligase, mitochondrial OS=Mus musculus GN=Sars2 PE=2 SV=2	Q9JJL8	80	518	0.15444
>sp|P32020|NLTP_MOUSE Non-specific lipid-transfer protein OS=Mus musculus GN=Scp2 PE=1 SV=3	P32020	83	547	0.151737
>sp|P61922|GABT_MOUSE 4-aminobutyrate aminotransferase, mitochondrial OS=Mus musculus GN=Abat PE=1 SV=1	P61922	75	500	0.15
>sp|Q05421|CP2E1_MOUSE Cytochrome P450 2E1 OS=Mus musculus GN=Cyp2e1 PE=1 SV=1	Q05421	69	493	0.139959
>sp|Q921G7|ETFD_MOUSE Electron transfer flavoprotein-ubiquinone oxidoreductase, mitochondrial OS=Mus musculus GN=Etfdh PE=1 SV=1	Q921G7	86	616	0.13961
>sp|Q9Z0X1|AIFM1_MOUSE Apoptosis-inducing factor 1, mitochondrial OS=Mus musculus GN=Aifm1 PE=1 SV=1	Q9Z0X1	85	612	0.138889
>sp|P25688|URIC_MOUSE Uricase OS=Mus musculus GN=Uox PE=1 SV=2	P25688	41	303	0.135314
>sp|P52196|THTR_MOUSE Thiosulfate sulfurtransferase OS=Mus musculus GN=Tst PE=1 SV=3	P52196	39	297	0.131313
>sp|Q8BWT1|THIM_MOUSE 3-ketoacyl-CoA thiolase, mitochondrial OS=Mus musculus GN=Acaa2 PE=1 SV=3	Q8BWT1	52	397	0.130982
>sp|P56593|CP2AC_MOUSE Cytochrome P450 2A12 OS=Mus musculus GN=Cyp2a12 PE=1 SV=2	P56593	61	492	0.123984
>sp|P50285|FMO1_MOUSE Dimethylaniline monooxygenase [N-oxide-forming] 1 OS=Mus musculus GN=Fmo1 PE=1 SV=1	P50285	65	532	0.12218
>sp|Q921I1|TRFE_MOUSE Serotransferrin OS=Mus musculus GN=Tf PE=1 SV=1	Q921I1	85	697	0.121951
>sp|Q99LC5|ETFA_MOUSE Electron transfer flavoprotein subunit alpha, mitochondrial OS=Mus musculus GN=Etfa PE=1 SV=2	Q99LC5	39	333	0.117117
>sp|Q9QXX4|CMC2_MOUSE Calcium-binding mitochondrial carrier protein Aralar2 OS=Mus musculus GN=Slc25a13 PE=1 SV=1	Q9QXX4	76	676	0.112426
>sp|P41216|ACSL1_MOUSE Long-chain-fatty-acid--CoA ligase 1 OS=Mus musculus GN=Acsl1 PE=1 SV=2	P41216	78	699	0.111588
>sp|P45952|ACADM_MOUSE Medium-chain specific acyl-CoA dehydrogenase, mitochondrial OS=Mus musculus GN=Acadm PE=1 SV=1	P45952	46	421	0.109264
>sp|Q64435|UD16_MOUSE UDP-glucuronosyltransferase 1-6 OS=Mus musculus GN=Ugt1a6 PE=1 SV=1	Q64435	58	531	0.109228
>sp|Q8QZT1|THIL_MOUSE Acetyl-CoA acetyltransferase, mitochondrial OS=Mus musculus GN=Acat1 PE=1 SV=1	Q8QZT1	46	424	0.108491
>sp|Q8VCW8|ACSF2_MOUSE Acyl-CoA synthetase family member 2, mitochondrial OS=Mus musculus GN=Acsf2 PE=2 SV=1	Q8VCW8	65	615	0.105691
>sp|P38647|GRP75_MOUSE Stress-70 protein, mitochondrial OS=Mus musculus GN=Hspa9 PE=1 SV=2	P38647	71	679	0.104566
>sp|Q8K0E8|FIBB_MOUSE Fibrinogen beta chain OS=Mus musculus GN=Fgb PE=2 SV=1	Q8K0E8	50	481	0.10395
>sp|P63038|CH60_MOUSE 60 kDa heat shock protein, mitochondrial OS=Mus musculus GN=Hspd1 PE=1 SV=1	P63038	59	573	0.102967
>sp|Q91X77|CY250_MOUSE Cytochrome P450 2C50 OS=Mus musculus GN=Cyp2c50 PE=1 SV=2	Q91X77	50	490	0.102041
>sp|Q61781|K1C14_MOUSE Keratin, type I cytoskeletal 14 OS=Mus musculus GN=Krt14 PE=1 SV=2	Q61781	48	484	0.0991736
>sp|Q9CQN1|TRAP1_MOUSE Heat shock protein 75 kDa, mitochondrial OS=Mus musculus GN=Trap1 PE=1 SV=1	Q9CQN1	70	706	0.0991501
>sp|Q921X9|PDIA5_MOUSE Protein disulfide-isomerase A5 OS=Mus musculus GN=Pdia5 PE=2 SV=1	Q921X9	51	517	0.098646
>sp|Q9DCW4|ETFB_MOUSE Electron transfer flavoprotein subunit beta OS=Mus musculus GN=Etfb PE=1 SV=3	Q9DCW4	25	255	0.0980392
>sp|P47740|AL3A2_MOUSE Fatty aldehyde dehydrogenase OS=Mus musculus GN=Aldh3a2 PE=2 SV=2	P47740	47	484	0.0971074
>sp|Q9R0H0|ACOX1_MOUSE Peroxisomal acyl-coenzyme A oxidase 1 OS=Mus musculus GN=Acox1 PE=1 SV=5	Q9R0H0	64	661	0.096823
>sp|Q9QXE0|HACL1_MOUSE 2-hydroxyacyl-CoA lyase 1 OS=Mus musculus GN=Hacl1 PE=1 SV=2	Q9QXE0	56	581	0.0963855
>sp|Q8BGA8|ACSM5_MOUSE Acyl-coenzyme A synthetase ACSM5, mitochondrial OS=Mus musculus GN=Acsm5 PE=2 SV=1	Q8BGA8	55	578	0.0951557
>sp|Q05920|PYC_MOUSE Pyruvate carboxylase, mitochondrial OS=Mus musculus GN=Pc PE=1 SV=1	Q05920	112	1178	0.0950764
>sp|Q99KI0|ACON_MOUSE Aconitate hydratase, mitochondrial OS=Mus musculus GN=Aco2 PE=1 SV=1	Q99KI0	73	780	0.0935897
>sp|P20108|PRDX3_MOUSE Thioredoxin-dependent peroxide reductase, mitochondrial OS=Mus musculus GN=Prdx3 PE=1 SV=1	P20108	24	257	0.0933852
>sp|Q71RI9|KAT3_MOUSE Kynurenine--oxoglutarate transaminase 3 OS=Mus musculus GN=Ccbl2 PE=1 SV=1	Q71RI9	42	455	0.0923077
>sp|Q07417|ACADS_MOUSE Short-chain specific acyl-CoA dehydrogenase, mitochondrial OS=Mus musculus GN=Acads PE=2 SV=2	Q07417	38	412	0.092233
>sp|Q8BW75|AOFB_MOUSE Amine oxidase [flavin-containing] B OS=Mus musculus GN=Maob PE=1 SV=4	Q8BW75	47	520	0.0903846
>sp|Q63886|UD11_MOUSE UDP-glucuronosyltransferase 1-1 OS=Mus musculus GN=Ugt1a1 PE=2 SV=2	Q63886	48	535	0.0897196
>sp|P08249|MDHM_MOUSE Malate dehydrogenase, mitochondrial OS=Mus musculus GN=Mdh2 PE=1 SV=3	P08249	29	338	0.0857988
>sp|Q99K67|AASS_MOUSE Alpha-aminoadipic semialdehyde synthase, mitochondrial OS=Mus musculus GN=Aass PE=2 SV=1	Q99K67	79	926	0.0853132
>sp|P05202|AATM_MOUSE Aspartate aminotransferase, mitochondrial OS=Mus musculus GN=Got2 PE=1 SV=1	P05202	36	430	0.0837209
>sp|Q99MR8|MCCA_MOUSE Methylcrotonoyl-CoA carboxylase subunit alpha, mitochondrial OS=Mus musculus GN=Mccc1 PE=2 SV=2	Q99MR8	60	717	0.083682
>sp|Q64458|CP2CT_MOUSE Cytochrome P450 2C29 OS=Mus musculus GN=Cyp2c29 PE=1 SV=2	Q64458	41	490	0.0836735
>sp|Q91X34|BAAT_MOUSE Bile acid-CoA:amino acid N-acyltransferase OS=Mus musculus GN=Baat PE=1 SV=1	Q91X34	35	420	0.0833333
>sp|Q91ZA3|PCCA_MOUSE Propionyl-CoA carboxylase alpha chain, mitochondrial OS=Mus musculus GN=Pcca PE=2 SV=2	Q91ZA3	59	724	0.0814917
>sp|Q9DBT9|M2GD_MOUSE Dimethylglycine dehydrogenase, mitochondrial OS=Mus musculus GN=Dmgdh PE=1 SV=1	Q9DBT9	70	869	0.0805524
>sp|P51881|ADT2_MOUSE ADP/ATP translocase 2 OS=Mus musculus GN=Slc25a5 PE=1 SV=3	P51881	24	298	0.0805369
>sp|Q922Q1|MOSC2_MOUSE MOSC domain-containing protein 2, mitochondrial OS=Mus musculus GN=Marc2 PE=1 SV=1	Q922Q1	26	338	0.0769231
>sp|P56657|CP240_MOUSE Cytochrome P450 2C40 OS=Mus musculus GN=Cyp2c40 PE=2 SV=2	P56657	36	491	0.0733198
>sp|O88451|RDH7_MOUSE Retinol dehydrogenase 7 OS=Mus musculus GN=Rdh7 PE=2 SV=1	O88451	23	316	0.0727848
>sp|P00687|AMY1_MOUSE Alpha-amylase 1 OS=Mus musculus GN=Amy1 PE=1 SV=2	P00687	37	511	0.072407
>sp|P14211|CALR_MOUSE Calreticulin OS=Mus musculus GN=Calr PE=1 SV=1	P14211	29	416	0.0697115
>sp|B7ZMP1|XPP3_MOUSE Probable Xaa-Pro aminopeptidase 3 OS=Mus musculus GN=Xpnpep3 PE=2 SV=1	B7ZMP1	35	506	0.06917
>sp|Q571F8|GLSL_MOUSE Glutaminase liver isoform, mitochondrial OS=Mus musculus GN=Gls2 PE=2 SV=2	Q571F8	41	602	0.0681063
>sp|Q9JLT4|TRXR2_MOUSE Thioredoxin reductase 2, mitochondrial OS=Mus musculus GN=Txnrd2 PE=1 SV=4	Q9JLT4	35	524	0.0667939
>sp|P17717|UDB17_MOUSE UDP-glucuronosyltransferase 2B17 OS=Mus musculus GN=Ugt2b17 PE=2 SV=1	P17717	35	530	0.0660377
>sp|Q9JMA7|CP341_MOUSE Cytochrome P450 3A41 OS=Mus musculus GN=Cyp3a41a PE=2 SV=2	Q9JMA7	33	504	0.0654762
>sp|Q9QXC1|FETUB_MOUSE Fetuin-B OS=Mus musculus GN=Fetub PE=1 SV=1	Q9QXC1	25	388	0.064433
>sp|Q9JHI5|IVD_MOUSE Isovaleryl-CoA dehydrogenase, mitochondrial OS=Mus musculus GN=Ivd PE=1 SV=1	Q9JHI5	26	424	0.0613208
>sp|Q9DBG1|CP27A_MOUSE Sterol 26-hydroxylase, mitochondrial OS=Mus musculus GN=Cyp27a1 PE=1 SV=1	Q9DBG1	31	533	0.0581614
>sp|Q922U2|K2C5_MOUSE Keratin, type II cytoskeletal 5 OS=Mus musculus GN=Krt5 PE=1 SV=1	Q922U2	33	580	0.0568966
>sp|Q8VCM8|NCLN_MOUSE Nicalin OS=Mus musculus GN=Ncln PE=2 SV=2	Q8VCM8	32	563	0.0568384
>sp|Q9WU79|PROD_MOUSE Proline dehydrogenase 1, mitochondrial OS=Mus musculus GN=Prodh PE=2 SV=2	Q9WU79	33	599	0.0550918
>sp|P97742|CPT1A_MOUSE Carnitine O-palmitoyltransferase 1, liver isoform OS=Mus musculus GN=Cpt1a PE=2 SV=4	P97742	42	773	0.0543338
>sp|Q9DD20|MET7B_MOUSE Methyltransferase-like protein 7B OS=Mus musculus GN=Mettl7b PE=2 SV=2	Q9DD20	13	244	0.0532787
>sp|Q60649|CLPB_MOUSE Caseinolytic peptidase B protein homolog OS=Mus musculus GN=Clpb PE=1 SV=1	Q60649	36	677	0.0531758
>sp|Q8BFR5|EFTU_MOUSE Elongation factor Tu, mitochondrial OS=Mus musculus GN=Tufm PE=1 SV=1	Q8BFR5	24	452	0.0530973
>sp|Q8JZN5|ACAD9_MOUSE Acyl-CoA dehydrogenase family member 9, mitochondrial OS=Mus musculus GN=Acad9 PE=2 SV=2	Q8JZN5	32	625	0.0512
>sp|Q61425|HCDH_MOUSE Hydroxyacyl-coenzyme A dehydrogenase, mitochondrial OS=Mus musculus GN=Hadh PE=1 SV=2	Q61425	16	314	0.0509554
>sp|P54071|IDHP_MOUSE Isocitrate dehydrogenase [NADP], mitochondrial OS=Mus musculus GN=Idh2 PE=1 SV=3	P54071	23	452	0.050885
>sp|Q64464|CP3AD_MOUSE Cytochrome P450 3A13 OS=Mus musculus GN=Cyp3a13 PE=2 SV=1	Q64464	25	503	0.0497018
>sp|Q8BWQ1|UD2A3_MOUSE UDP-glucuronosyltransferase 2A3 OS=Mus musculus GN=Ugt2a3 PE=2 SV=1	Q8BWQ1	26	534	0.0486891
>sp|Q99L13|3HIDH_MOUSE 3-hydroxyisobutyrate dehydrogenase, mitochondrial OS=Mus musculus GN=Hibadh PE=2 SV=1	Q99L13	16	335	0.0477612
>sp|Q60930|VDAC2_MOUSE Voltage-dependent anion-selective channel protein 2 OS=Mus musculus GN=Vdac2 PE=1 SV=2	Q60930	14	295	0.0474576
>sp|P19221|THRB_MOUSE Prothrombin OS=Mus musculus GN=F2 PE=1 SV=1	P19221	29	618	0.0469256
>sp|Q9Z2I8|SUCB2_MOUSE Succinyl-CoA ligase [GDP-forming] subunit beta, mitochondrial OS=Mus musculus GN=Suclg2 PE=2 SV=3	Q9Z2I8	20	433	0.0461894
>sp|Q9DC50|OCTC_MOUSE Peroxisomal carnitine O-octanoyltransferase OS=Mus musculus GN=Crot PE=1 SV=1	Q9DC50	28	612	0.0457516
>sp|Q60759|GCDH_MOUSE Glutaryl-CoA dehydrogenase, mitochondrial OS=Mus musculus GN=Gcdh PE=2 SV=2	Q60759	20	438	0.0456621
>sp|Q9DB77|QCR2_MOUSE Cytochrome b-c1 complex subunit 2, mitochondrial OS=Mus musculus GN=Uqcrc2 PE=1 SV=1	Q9DB77	20	453	0.0441501
>sp|P53395|ODB2_MOUSE Lipoamide acyltransferase component of branched-chain alpha-keto acid dehydrogenase complex, mitochondrial OS=Mus musculus GN=Dbt PE=2 SV=2	P53395	21	482	0.0435685
>sp|P09103|PDIA1_MOUSE Protein disulfide-isomerase OS=Mus musculus GN=P4hb PE=1 SV=2	P09103	22	509	0.043222
>sp|P56480|ATPB_MOUSE ATP synthase subunit beta, mitochondrial OS=Mus musculus GN=Atp5b PE=1 SV=2	P56480	22	529	0.0415879
>sp|P58710|GGLO_MOUSE L-gulonolactone oxidase OS=Mus musculus GN=Gulo PE=1 SV=3	P58710	18	440	0.0409091
>sp|P51660|DHB4_MOUSE Peroxisomal multifunctional enzyme type 2 OS=Mus musculus GN=Hsd17b4 PE=1 SV=3	P51660	29	735	0.0394558
>sp|O55125|NIPS1_MOUSE Protein NipSnap homolog 1 OS=Mus musculus GN=Nipsnap1 PE=1 SV=1	O55125	11	284	0.0387324
>sp|P29758|OAT_MOUSE Ornithine aminotransferase, mitochondrial OS=Mus musculus GN=Oat PE=1 SV=1	P29758	17	439	0.0387244
>sp|Q8BMS1|ECHA_MOUSE Trifunctional enzyme subunit alpha, mitochondrial OS=Mus musculus GN=Hadha PE=1 SV=1	Q8BMS1	29	763	0.0380079
>sp|P97501|FMO3_MOUSE Dimethylaniline monooxygenase [N-oxide-forming] 3 OS=Mus musculus GN=Fmo3 PE=1 SV=1	P97501	20	534	0.0374532
>sp|Q9DCU9|HOGA1_MOUSE Probable 4-hydroxy-2-oxoglutarate aldolase, mitochondrial OS=Mus musculus GN=Hoga1 PE=1 SV=1	Q9DCU9	12	321	0.0373832
>sp|Q9D0M3|CY1_MOUSE Cytochrome c1, heme protein, mitochondrial OS=Mus musculus GN=Cyc1 PE=1 SV=1	Q9D0M3	12	325	0.0369231
>sp|Q8BJ64|CHDH_MOUSE Choline dehydrogenase, mitochondrial OS=Mus musculus GN=Chdh PE=1 SV=1	Q8BJ64	22	596	0.0369128
>sp|O35423|SPYA_MOUSE Serine--pyruvate aminotransferase, mitochondrial OS=Mus musculus GN=Agxt PE=1 SV=2	O35423	15	413	0.0363196
>sp|P58252|EF2_MOUSE Elongation factor 2 OS=Mus musculus GN=Eef2 PE=1 SV=2	P58252	31	858	0.0361305
>sp|Q8VCC2|EST1_MOUSE Liver carboxylesterase 1 OS=Mus musculus GN=Ces1 PE=2 SV=1	Q8VCC2	19	565	0.0336283
>sp|Q9CZU6|CISY_MOUSE Citrate synthase, mitochondrial OS=Mus musculus GN=Cs PE=1 SV=1	Q9CZU6	15	464	0.0323276
>sp|O35490|BHMT1_MOUSE Betaine--homocysteine S-methyltransferase 1 OS=Mus musculus GN=Bhmt PE=2 SV=1	O35490	13	407	0.031941
>sp|Q9CQH3|NDUB5_MOUSE NADH dehydrogenase [ubiquinone] 1 beta subcomplex subunit 5, mitochondrial OS=Mus musculus GN=Ndufb5 PE=1 SV=1	Q9CQH3	6	189	0.031746
>sp|Q9D3R5|F187A_MOUSE Ig-like V-type domain-containing protein FAM187A OS=Mus musculus GN=Fam187a PE=2 SV=1	Q9D3R5	13	417	0.0311751
>sp|P01869|IGH1M_MOUSE Ig gamma-1 chain C region, membrane-bound form OS=Mus musculus GN=Ighg1 PE=1 SV=2	P01869	12	393	0.0305344
>sp|Q9CW42|MOSC1_MOUSE MOSC domain-containing protein 1, mitochondrial OS=Mus musculus GN=Marc1 PE=1 SV=2	Q9CW42	9	340	0.0264706
>sp|Q8K370|ACD10_MOUSE Acyl-CoA dehydrogenase family member 10 OS=Mus musculus GN=Acad10 PE=2 SV=1	Q8K370	28	1069	0.0261927
>sp|Q8JZZ0|UD3A2_MOUSE UDP-glucuronosyltransferase 3A2 OS=Mus musculus GN=Ugt3a2 PE=2 SV=2	Q8JZZ0	13	523	0.0248566
>sp|Q8CC88|K0564_MOUSE Uncharacterized protein KIAA0564 homolog OS=Mus musculus GN=Kiaa0564 PE=2 SV=2	Q8CC88	44	1905	0.0230971
>sp|Q99PL5|RRBP1_MOUSE Ribosome-binding protein 1 OS=Mus musculus GN=Rrbp1 PE=2 SV=2	Q99PL5	34	1605	0.0211838
>sp|Q8BH59|CMC1_MOUSE Calcium-binding mitochondrial carrier protein Aralar1 OS=Mus musculus GN=Slc25a12 PE=1 SV=1	Q8BH59	14	677	0.0206795
>sp|P55096|ABCD3_MOUSE ATP-binding cassette sub-family D member 3 OS=Mus musculus GN=Abcd3 PE=1 SV=2	P55096	11	659	0.016692
