# Supplementary material for: Targeting colorectal cancer with small-molecule inhibitors of ALDH1B1
Source: Springer Nature journal article supplement (doi:10.1038/s41589-022-01048-w), 2022-07-04
Supplement: MOESM8 [file 41589_2022_1048_MOESM8_ESM.xlsx]

## Sheet: Fig. 1g
Activities of imidazoliums 1-3 against ALDH isoforms (DMSO control = 1)
ALDH isoform	10 µM Imidazolium 1				50 µM Imidazolium 1				10 µM Imidazolium 2		50 µM Imidazolium 2		10 µM Imidazolium 3				50 µM Imidazolium 3
1A1	0.834737	0.932402	0.958634	0.920742	0.76144	0.715632	0.857887	0.796155	0.251245	0.259407	0.141166	0.109777	1.01094	1.01976	0.892139	1.12849	0.815298	0.775613	0.85559	0.754238
1A2	1.15829	1.2173	1.24085	1.18563	1.15064	1.01086	1.13037	1.2219	0.858795	0.882841	0.623446	0.624541	0.830362	0.880806	0.917919	0.980446	0.660669	0.661484	0.651928	0.710437
1A3	0.859444	1.00194	0.865966	0.937834	0.722485	0.736513	0.686227	0.669335	0.464056	0.466525	0.331252	0.355391	0.921988	0.963219	0.975591	0.956226	0.685133	0.696474	0.69058	0.768408
1B1	0.53497	0.656064	0.679957	0.692406	0.467285	0.482248	0.524327	0.538984	0.0498387	0.0463258	0.029754	0.0353649	0.561926	0.569118	0.553549	0.563086	0.367853	0.372397	0.310951	0.339678
2	1.0512	1.01984	0.720282	0.839864	1.0569	1.08546	0.864253	0.792577	1.01443	0.972039	1.01985	0.966647	0.917115	0.936223	0.95499	0.975684	0.648377	0.723149	0.800127	0.83067
3A1	0.397965	0.524306	0.788004	0.817901	0.305805	0.336981	0.559819	0.59561	1.23446	1.23136	2.03806	2.13879	1.15853	1.09144	0.951585	1.00179	1.45684	1.5913	1.20612	1.18182
3A2	1.379	1.40354	1.3407	1.32864	2.04391	2.06787	1.83357	1.8851	1.66336	1.66152	2.24594	2.41879	0.893906	0.926685	0.933578	0.929657	0.448725	0.432823	0.570348	0.559814
4A1	0.701943	0.684369	1.0392	1.12109	0.631746	0.734763	1.0475	1.03588	1.13257	1.09446	1.2327	1.13477	1.11336	1.16272	0.983882	1.25418	1.26913	1.10487	1.12906	1.08081
5	1.03945	1.00212	1.099	1.06001	1.09022	1.04176	1.09366	1.19232	1.30916	1.14822	1.25503	1.26477	1.03825	1.08303	0.988554	0.93532	0.863594	0.945945	0.853324	0.842795
7A1	1.07506	1.10927	0.816313	0.858643	1.03666	1.05354	0.850807	0.827353	1.08004	1.07089	1.08195	1.06018	1.06096	1.08557	1.12158	1.1157	1.06792	1.04478	1.02019	1.02114

## Sheet: Fig. 1h
Dose response of Imidazolium 2 against ALDH1A1, ALDH1A3 and ALDH1B1
Raw ALDH activities (DNADH fluorescence/second)
[Imidazolium 2] (nM)	ALDH1A1			ALDH1A3			ALDH1B1
0	0.151177	0.154629	0.15523	0.0539649	0.0527387	0.0542072	0.23088	0.252033	0.220305
50	0.153821	0.168179	0.160093	0.0522602	0.0583131	0.0527266	0.241125	0.268846	0.242471
100	0.155687	0.16364	0.164834	0.0518389	0.0608759	0.0553546	0.276929	0.273295	0.249005
500	0.149586	0.158504	0.160878	0.0525071	0.0589706	0.0519476	0.0562432	0.0688839	0.0569734
1000	0.151691	0.149671	0.163361	0.0504525	0.0547395	0.0544959	0.0235902	0.0311967	0.0257572
5000	0.101738	0.0867045	0.10747	0.0310238	0.0339176	0.0306601	0.00944763	0.0121733	0.00508027
10000	0.0808486	0.0562743	0.0773831	0.0243492	0.0244605	0.0226825	0.00678549	0.0074157	0.00699791
Normalized ALDH activities (0 nM = 1)
[Imidazolium 2] (nM)	ALDH1A1			ALDH1A3			ALDH1B1
0	0.983722	1.00619	1.01009	1.00611	0.983253	1.01063	0.984958	1.0752	0.939844
50	1.00093	1.09435	1.04174	0.974332	1.08718	0.983028	1.02866	1.14693	1.03441
100	1.01307	1.06482	1.07259	0.966478	1.13496	1.03202	1.18141	1.1659	1.06228
500	0.973365	1.0314	1.04684	0.978936	1.09944	0.968504	0.239939	0.293866	0.243055
1000	0.987064	0.97392	1.063	0.940631	1.02056	1.01601	0.100638	0.133089	0.109883
5000	0.662018	0.564193	0.699314	0.578404	0.632355	0.571624	0.0403046	0.0519326	0.021673
10000	0.526088	0.366181	0.503537	0.453964	0.456039	0.422889	0.0289476	0.0316362	0.0298538
