# Supplementary material for: Targeting colorectal cancer with small-molecule inhibitors of ALDH1B1
Source: Springer Nature journal article supplement (doi:10.1038/s41589-022-01048-w), 2022-07-04
Supplement: MOESM23 [file 41589_2022_1048_MOESM23_ESM.xlsx]

## Sheet: Extended Data Fig. 7b
Quantification of SW480 spheroid sizes
Spheroid area (µm2)
DMSO	2 µM IGUANA-3
511.169	503.54
534.058	507.355
549.316	507.355
587.463	511.169
606.537	514.984
606.537	518.799
610.352	530.243
644.684	530.243
659.943	541.687
686.646	556.946
690.46	556.946
698.09	560.76
705.719	572.205
720.978	572.205
728.607	576.019
736.237	579.834
751.495	602.722
774.384	606.537
789.642	610.352
801.086	617.981
808.716	617.981
812.531	621.796
892.639	625.61
896.454	640.869
900.269	648.499
900.269	675.201
904.083	682.831
907.898	701.904
911.713	709.534
926.971	720.978
957.489	728.607
980.377	743.866
980.377	774.384
1022.34	782.013
1029.97	797.272
1117.71	801.086
1129.15	816.345
1140.59	865.936
1152.04	892.639
1155.85	911.713
1174.93	915.527
1216.89	946.045
1235.96	1010.89
1239.78	1060.49
1247.41	1094.82
1270.29	1102.45
1277.92	1129.15
1293.18	1132.97
1300.81	1132.97
1342.77	1171.11
1354.22	1186.37
1373.29	1201.63
1388.55	1251.22
1392.36	1258.85
1411.44	1285.55
1415.25	1373.29
1457.21	1399.99
1464.84	1403.81
1480.1	1453.4
1487.73	1457.21
1502.99	1464.84
1537.32	1476.29
1544.95	1617.43
1560.21	1632.69
1575.47	1670.84
1575.47	1697.54
1609.8	1728.06
1621.25	1819.61
1667.02	1865.39
1678.47	1884.46
1686.1	1888.28
1697.54	1903.53
1720.43	1903.53
1724.24	1903.53
1739.5	1911.16
1750.95	2094.27
1762.39	2155.3
1766.2	2281.19
1785.28	3208.16
1792.91	3215.79
1823.43	3295.9
1823.43	3307.34
1838.68	3349.3
1857.76	3368.38
1869.2	3692.63
1876.83	3715.52
1892.09	5058.29
1899.72	5306.24
1907.35	5374.91
1930.24
1941.68
1956.94
1995.09
1995.09
2044.68
2056.12
2059.94
2079.01
2105.71
2113.34
2120.97
2204.9
2300.26
2334.59
2399.44
2407.07
2437.59
2502.44
2525.33
2620.7
2670.29
2735.14
2738.95
2758.03
2799.99
2811.43
2826.69
2975.46
2994.54
2998.35
3051.76
3108.98
3128.05
3158.57
3170.01
3276.82
3303.53
3387.45
3433.23
3452.3
3555.3
3582
3593.44
3601.07
3631.59
3669.74
3730.77
3776.55
3780.36
3799.44
3852.84
3871.92
3883.36
3921.51
3940.58
3955.84
3955.84
3974.91
3990.17
4016.88
4043.58
4165.65
4173.28
4188.54
4207.61
4291.53
4375.46
4486.08
4489.9
4516.6
4570.01
4589.08
4726.41
4825.59
4920.96
4997.25
5077.36
5111.69
5126.95
5146.03
5271.91
5496.98
5645.75
5653.38
5691.53
5912.78
6427.76
6645.2
6874.08
7385.25
7423.4
7446.29
7530.21
7694.24
7720.95
7785.8
7930.76
7953.64
8377.08
8525.85
8956.91
9052.28
9181.98
9216.31
9704.59
9975.43
10364.5
12050.6
13355.3
13763.4
13877.9
